# Supplementary material for: The relationship between radiomics and pathomics in Glioblastoma patients: Preliminary results from a cross-scale association study
Source: PubMed Central journal article supplement (PMC9582951; doi:10.3389/fonc.2022.1005805), 2022-10-06
Supplement: DataSheet_1.pdf [file DataSheet_1.pdf]

# The relationship between radiomics and pathomics in Glioblastoma patients: preliminary results from a cross-scale association study

Valentina Brancato<sup>1</sup>, Carlo Cavaliere<sup>1,\*</sup>, Nunzia Garbino<sup>1</sup>, Francesco Isgrò<sup>2</sup>, Marco Salvatore<sup>1</sup>, Marco Aiello<sup>1</sup>

<sup>1</sup>IRCCS Synlab SDN, via E.Gianturco 113, 80143, Naples, Italy.

<sup>2</sup> Department of Electrical Engineering and Information Technologies, University of Napoli Federico II, Napoli, Italy

## Supplementary Material

### 1 Features extracted

**Table S1. Extracted radiomics features.** The extracted radiomic features from ADC and T1+C images: First-order features including 18 intensity statistics; 73 multi-dimensional texture features including 23 Gray Level Co-occurrence Matrix (GLCM), 16 Gray Level Size Zone Matrix (GLSZM), 16 Gray Level Run Length Matrix (GLRLM), 14 Gray Level Dependence Matrix (GLDM) and 5 Neighboring Gray Tone Difference Matrix (NGTDM) Features.

| Feature group               | Feature name                  |
|-----------------------------|-------------------------------|
| <i>First order (n = 18)</i> | firstorder InterquartileRange |
|                             | firstorder Median             |
|                             | firstorder Uniformity         |
|                             | firstorder Range              |
|                             | firstorder Entropy            |
|                             | firstorder Minimum            |
|                             | firstorder Kurtosis           |
|                             | firstorder RootMeanSquared    |
|                             | firstorder 90Percentile       |
|                             | firstorder Energy             |
|                             | firstorder Skewness           |
|                             | firstorder Mean               |
|                             | firstorder Variance           |

| Feature group                        | Feature name                           |
|--------------------------------------|----------------------------------------|
|                                      | firstorder RobustMeanAbsoluteDeviation |
|                                      | firstorder MeanAbsoluteDeviation       |
|                                      | firstorder Maximum                     |
|                                      | firstorder 10Percentile                |
| <i>Second order texture (n = 73)</i> | glrlm RunLengthNonUniformity           |
|                                      | glrlm GrayLevelNonUniformityNormalized |
|                                      | glrlm LongRunLowGrayLevelEmphasis      |
|                                      | glrlm HighGrayLevelRunEmphasis         |
|                                      | glrlm RunVariance                      |
|                                      | glrlm RunLengthNonUniformityNormalized |
|                                      | glrlm ShortRunEmphasis                 |
|                                      | glrlm LongRunEmphasis                  |
|                                      | glrlm LongRunHighGrayLevelEmphasis     |
|                                      | glrlm GrayLevelNonUniformity           |
|                                      | glrlm ShortRunHighGrayLevelEmphasis    |
|                                      | glrlm ShortRunLowGrayLevelEmphasis     |
|                                      | glrlm RunPercentage                    |
|                                      | glrlm GrayLevelVariance                |
|                                      | glrlm RunEntropy                       |
|                                      | glrlm LowGrayLevelRunEmphasis          |
|                                      | ngtdm Coarseness                       |
|                                      | ngtdm Complexity                       |
|                                      | ngtdm Busyness                         |
|                                      | ngtdm Strength                         |
|                                      | ngtdm Contrast                         |
|                                      | glcm JointEntropy                      |
|                                      | glcm ClusterShade                      |
|                                      | glcm ClusterProminence                 |
|                                      | glcm Autocorrelation                   |
|                                      | glcm SumSquares                        |
| glcm SumEntropy                      |                                        |

| Feature group | Feature name                              |
|---------------|-------------------------------------------|
|               | glcm DifferenceVariance                   |
|               | glcm Idmn                                 |
|               | glcm Imc2                                 |
|               | glcm Imc1                                 |
|               | glcm DifferenceAverage                    |
|               | glcm JointAverage                         |
|               | glcm InverseVariance                      |
|               | glcm DifferenceEntropy                    |
|               | glcm Idm                                  |
|               | glcm Idn                                  |
|               | glcm Correlation                          |
|               | glcm MCC                                  |
|               | glcm ClusterTendency                      |
|               | glcm Contrast                             |
|               | glcm Id                                   |
|               | glcm MaximumProbability                   |
|               | glcm JointEnergy                          |
|               | gldm SmallDependenceHighGrayLevelEmphasis |
|               | gldm LargeDependenceLowGrayLevelEmphasis  |
|               | gldm DependenceNonUniformity              |
|               | gldm LargeDependenceHighGrayLevelEmphasis |
|               | gldm DependenceNonUniformityNormalized    |
|               | gldm LowGrayLevelEmphasis                 |
|               | gldm LargeDependenceEmphasis              |
|               | gldm SmallDependenceEmphasis              |
|               | gldm DependenceEntropy                    |
|               | gldm DependenceVariance                   |
|               | gldm SmallDependenceLowGrayLevelEmphasis  |
|               | gldm GrayLevelNonUniformity               |
|               | gldm HighGrayLevelEmphasis                |
|               | gldm GrayLevelVariance                    |
|               | glszm GrayLevelNonUniformityNormalized    |
|               | glszm SmallAreaHighGrayLevelEmphasis      |

| Feature group | Feature name                          |
|---------------|---------------------------------------|
|               | glszm GrayLevelVariance               |
|               | glszm LargeAreaEmphasis               |
|               | glszm SizeZoneNonUniformity           |
|               | glszm LargeAreaLowGrayLevelEmphasis   |
|               | glszm HighGrayLevelZoneEmphasis       |
|               | glszm ZonePercentage                  |
|               | glszm ZoneVariance                    |
|               | glszm GrayLevelNonUniformity          |
|               | glszm LargeAreaHighGrayLevelEmphasis  |
|               | glszm SizeZoneNonUniformityNormalized |
|               | glszm SmallAreaEmphasis               |
|               | glszm ZoneEntropy                     |
|               | glszm SmallAreaLowGrayLevelEmphasis   |
|               | glszm LowGrayLevelZoneEmphasis        |

**Table S2. Extracted pathomic features.** The extracted pathomic features from detection measurements (shape characteristics, intranuclear Haralick texture features, Delaunay triangulation) and cell-density maps features including 18 firstorder intensity statistics and 73 multi-dimensional texture features including 23 Gray Level Co-occurrence Matrix (GLCM), 16 Gray Level Size Zone Matrix (GLSZM), 16 Gray Level Run Length Matrix (GLRLM), 14 Gray Level Dependence Matrix (GLDM) and 5 Neighboring Gray Tone Difference Matrix (NGTDM) Features.

| Feature group                 | Feature name                     |
|-------------------------------|----------------------------------|
| <i>Detection measurements</i> | MEAN Nucleus Area                |
|                               | MEAN Nucleus Perimeter           |
|                               | MEAN Nucleus Circularity         |
|                               | MEAN Nucleus MaxCaliper          |
|                               | MEAN Nucleus MinCaliper          |
|                               | MEAN Nucleus Eccentricity        |
|                               | MEAN Nucleus HematoxylinODMean   |
|                               | MEAN Nucleus HematoxylinODSum    |
|                               | MEAN Nucleus HematoxylinODStdDev |
|                               | MEAN Nucleus HematoxylinODMax    |

| Feature group | Feature name                       |
|---------------|------------------------------------|
|               | MEAN Nucleus HematoxylinODMin      |
|               | MEAN Nucleus HematoxylinODRange    |
|               | MEAN Nucleus EosinODMean           |
|               | MEAN Nucleus EosinODSum            |
|               | MEAN Nucleus EosinODStdDev         |
|               | MEAN Nucleus EosinODMax            |
|               | MEAN Nucleus EosinODMin            |
|               | MEAN Nucleus EosinODRange          |
|               | MEAN Cell Area                     |
|               | MEAN Cell Perimeter                |
|               | MEAN Cell Circularity              |
|               | MEAN Cell MaxCaliper               |
|               | MEAN Cell MinCaliper               |
|               | MEAN Cell Eccentricity             |
|               | MEAN Cell HematoxylinODMean        |
|               | MEAN Cell HematoxylinODStdDev      |
|               | MEAN Cell HematoxylinODMax         |
|               | MEAN Cell HematoxylinODMin         |
|               | MEAN Cell EosinODMean              |
|               | MEAN Cell EosinODStdDev            |
|               | MEAN Cell EosinODMax               |
|               | MEAN Cell EosinODMin               |
|               | MEAN Cytoplasm HematoxylinODMean   |
|               | MEAN Cytoplasm HematoxylinODStdDev |
|               | MEAN Cytoplasm HematoxylinODMax    |
|               | MEAN Cytoplasm HematoxylinODMin    |
|               | MEAN Cytoplasm EosinODMean         |
|               | MEAN Cytoplasm EosinODStdDev       |
|               | MEAN Cytoplasm EosinODMax          |
|               | MEAN Cytoplasm EosinODMin          |
|               | MEAN Nucleus CellAreaRatio         |
|               | MEAN Delaunay MeanDistance         |
|               | MEAN Delaunay MedianDistance       |

| Feature group                               | Feature name                                             |
|---------------------------------------------|----------------------------------------------------------|
|                                             | MEAN Delaunay MaxDistance                                |
|                                             | MEAN Delaunay MinDistance                                |
|                                             | MEAN Delaunay MeanTriangleArea                           |
|                                             | MEAN Delaunay MaxTriangleArea                            |
|                                             | MEAN ODSum Mean                                          |
|                                             | MEAN ODSum Std dev                                       |
|                                             | MEAN ODSum Min                                           |
|                                             | MEAN ODSum Max                                           |
|                                             | MEAN ODSum Median                                        |
|                                             | MEAN ODSum HaralickAngularSecondMoment F0                |
|                                             | MEAN ODSum HaralickContrast F1                           |
|                                             | MEAN ODSum HaralickCorrelation F2                        |
|                                             | MEAN ODSum HaralickSumOfSquares F3                       |
|                                             | MEAN ODSum HaralickInverseDifferenceMomen                |
|                                             | MEAN ODSum HaralickSumAverage F5                         |
|                                             | MEAN ODSum HaralickSumVariance F6                        |
|                                             | MEAN ODSum HaralickSumEntropy F7                         |
|                                             | MEAN ODSum HaralickEntropy F8                            |
|                                             | MEAN ODSum HaralickDifferenceVariance F9                 |
|                                             | MEAN ODSum HaralickDifferenceEntropy F10                 |
|                                             | MEAN ODSum HaralickInformationMeasureOfCorrelation 1 F11 |
|                                             | MEAN ODSum HaralickInformationMeasureOfCorrelation 2 F12 |
| <i>Cell-density map-based (first-order)</i> | firstorder InterquartileRange                            |
|                                             | firstorder Median                                        |
|                                             | firstorder Uniformity                                    |
|                                             | firstorder Range                                         |
|                                             | firstorder Entropy                                       |
|                                             | firstorder Minimum                                       |
|                                             | firstorder Kurtosis                                      |
|                                             | firstorder RootMeanSquared                               |

| Feature group | Feature name                           |
|---------------|----------------------------------------|
|               | firstorder 90Percentile                |
|               | firstorder Energy                      |
|               | firstorder Skewness                    |
|               | firstorder Mean                        |
|               | firstorder Variance                    |
|               | firstorder RobustMeanAbsoluteDeviation |
|               | firstorder MeanAbsoluteDeviation       |
|               | firstorder Maximum                     |
|               | firstorder 10Percentile                |
|               | glrlm RunLengthNonUniformity           |
|               | glrlm GrayLevelNonUniformityNormalized |
|               | glrlm LongRunLowGrayLevelEmphasis      |
|               | glrlm HighGrayLevelRunEmphasis         |
|               | glrlm RunVariance                      |
|               | glrlm RunLengthNonUniformityNormalized |
|               | glrlm ShortRunEmphasis                 |
|               | glrlm LongRunEmphasis                  |
|               | glrlm LongRunHighGrayLevelEmphasis     |
|               | glrlm GrayLevelNonUniformity           |
|               | glrlm ShortRunHighGrayLevelEmphasis    |
|               | glrlm ShortRunLowGrayLevelEmphasis     |
|               | glrlm RunPercentage                    |
|               | glrlm GrayLevelVariance                |
|               | glrlm RunEntropy                       |
|               | glrlm LowGrayLevelRunEmphasis          |
|               | ngtdm Coarseness                       |
|               | ngtdm Complexity                       |
|               | ngtdm Busyness                         |
|               | ngtdm Strength                         |
|               | ngtdm Contrast                         |
|               | glcm JointEntropy                      |
|               | glcm ClusterShade                      |
|               | glcm ClusterProminence                 |

| Feature group | Feature name                              |
|---------------|-------------------------------------------|
|               | glcm Autocorrelation                      |
|               | glcm SumSquares                           |
|               | glcm SumEntropy                           |
|               | glcm DifferenceVariance                   |
|               | glcm Idmn                                 |
|               | glcm Imc2                                 |
|               | glcm Imc1                                 |
|               | glcm DifferenceAverage                    |
|               | glcm JointAverage                         |
|               | glcm InverseVariance                      |
|               | glcm DifferenceEntropy                    |
|               | glcm Idm                                  |
|               | glcm Idn                                  |
|               | glcm Correlation                          |
|               | glcm MCC                                  |
|               | glcm ClusterTendency                      |
|               | glcm Contrast                             |
|               | glcm Id                                   |
|               | glcm MaximumProbability                   |
|               | glcm JointEnergy                          |
|               | gldm SmallDependenceHighGrayLevelEmphasis |
|               | gldm LargeDependenceLowGrayLevelEmphasis  |
|               | gldm DependenceNonUniformity              |
|               | gldm LargeDependenceHighGrayLevelEmphasis |
|               | gldm DependenceNonUniformityNormalized    |
|               | gldm LowGrayLevelEmphasis                 |
|               | gldm LargeDependenceEmphasis              |
|               | gldm SmallDependenceEmphasis              |
|               | gldm DependenceEntropy                    |
|               | gldm DependenceVariance                   |



| Feature group | Feature name                             |
|---------------|------------------------------------------|
|               | gldm SmallDependenceLowGrayLevelEmphasis |
|               | gldm GrayLevelNonUniformity              |
|               | gldm HighGrayLevelEmphasis               |
|               | gldm GrayLevelVariance                   |
|               | glszm GrayLevelNonUniformityNormalized   |
|               | glszm SmallAreaHighGrayLevelEmphasis     |
|               | glszm GrayLevelVariance                  |
|               | glszm LargeAreaEmphasis                  |
|               | glszm SizeZoneNonUniformity              |
|               | glszm LargeAreaLowGrayLevelEmphasis      |
|               | glszm HighGrayLevelZoneEmphasis          |
|               | glszm ZonePercentage                     |
|               | glszm ZoneVariance                       |
|               | glszm GrayLevelNonUniformity             |
|               | glszm LargeAreaHighGrayLevelEmphasis     |
|               | glszm SizeZoneNonUniformityNormalized    |
|               | glszm SmallAreaEmphasis                  |
|               | glszm ZoneEntropy                        |
|               | glszm SmallAreaLowGrayLevelEmphasis      |
|               | glszm LowGrayLevelZoneEmphasis           |

## 2 Summary of the significantly moderately correlated radiomic-pathomic features

**Table S3** Summary of the significantly moderately correlated radiomic-pathomic features, with radiomic features extracted from ADC. Abbreviations: CD = Cellular Density; ADC = Apparent Diffusion Coefficient; LALGLE = Large Area Low Gray Level Emphasis; IMOC = Information Measure Of Correlation; ASM = Angular Second Moment; LDLGLE = Large Dependence Low Gray Level Emphasis; LDHGLE = Large Dependence High Gray Level Emphasis; SDLGLE = Small Dependence Low Gray Level Emphasis; LALGLE = Large Area Low Gray Level Emphasis; GLNUN = Gray level non uniformity normalized; glcm = gray level co-occurrence matrix; gldm = Gray Level Dependence Matrix; glszm = Gray Level Size Zone Matrix; ngtdm = Neighbouring Gray Tone Difference Matrix; glrlm = Gray Level Run Length Matrix.

| Radiomic ADC feature name | Pathomic feature name               | $\rho$ | Q-value               | BF                 |
|---------------------------|-------------------------------------|--------|-----------------------|--------------------|
| ADC glcm ClusterShade     | MEAN Haralick ASM F0                | 0.589  | $1.66 \times 10^{-3}$ | $1.73 \times 10^3$ |
| ADC glcm Imc2             | CD100 $\mu$ m glrlm LongRunEmphasis | -0.589 | $1.67 \times 10^{-3}$ | $1.68 \times 10^3$ |
| ADC firstorder Maximum    | CD200 $\mu$ m ngtdm Strength        | 0.588  | $1.71 \times 10^{-3}$ | $1.62 \times 10^3$ |

| Radiomic ADC feature name   | Pathomic feature name                | $\rho$ | Q-value               | BF                 |
|-----------------------------|--------------------------------------|--------|-----------------------|--------------------|
| ADC firstorder 90Percentile | MEAN Haralick IMOC F12               | -0.586 | $1.83 \times 10^{-3}$ | $1.49 \times 10^3$ |
| ADC glcm DifferenceAverage  | MEAN Haralick ASM F0                 | 0.585  | $1.84 \times 10^{-3}$ | $1.46 \times 10^3$ |
| ADC glcm DifferenceVariance | CD100 $\mu$ m ngtdm Strength         | 0.584  | $1.88 \times 10^{-3}$ | $1.40 \times 10^3$ |
| ADC glcm InverseVariance    | CD150 $\mu$ m glszm LALGLE           | 0.582  | $1.99 \times 10^{-3}$ | $1.31 \times 10^3$ |
| ADC firstorder 90Percentile | CD100 $\mu$ m ngtdm Strength         | 0.579  | $2.26 \times 10^{-3}$ | $1.14 \times 10^3$ |
| ADC gldm DependenceVariance | CD100 $\mu$ m glrlm LongRunEmphasis  | 0.578  | $2.34 \times 10^{-3}$ | $1.09 \times 10^3$ |
| ADC gldm SDLGLE             | MEAN Haralick IMOC F12               | -0.577 | $2.42 \times 10^{-3}$ | $1.04 \times 10^3$ |
| ADC glcm ClusterProminence  | CD200 $\mu$ m ngtdm Strength         | 0.573  | $2.72 \times 10^{-3}$ | $9.15 \times 10^2$ |
| ADC ngtdm Complexity        | CD150 $\mu$ m glcm Contrast          | 0.573  | $2.76 \times 10^{-3}$ | $8.89 \times 10^2$ |
| ADC ngtdm Complexity        | CD50 $\mu$ m glcm DifferenceVariance | 0.572  | $2.82 \times 10^{-3}$ | $8.56 \times 10^2$ |
| ADC gldm SDLGLE             | CD200 $\mu$ m ngtdm Strength         | 0.57   | $2.91 \times 10^{-3}$ | $8.19 \times 10^2$ |
| ADC firstorder TotalEnergy  | CD50 $\mu$ m glcm DifferenceVariance | 0.564  | $3.67 \times 10^{-3}$ | $6.50 \times 10^2$ |
| ADC glrlm RunVariance       | CD100 $\mu$ m glrlm LongRunEmphasis  | 0.563  | $3.73 \times 10^{-3}$ | $6.30 \times 10^2$ |
| ADC firstorder 10Percentile | CD150 $\mu$ m ngtdm Strength         | 0.558  | $4.55 \times 10^{-3}$ | $5.15 \times 10^2$ |
| ADC glcm ClusterProminence  | CD50 $\mu$ m glcm DifferenceVariance | 0.546  | $7.04 \times 10^{-3}$ | $3.37 \times 10^2$ |
| ADC ngtdm Strength          | MEAN Haralick ASM F0                 | 0.543  | $7.74 \times 10^{-3}$ | $3.01 \times 10^2$ |
| ADC firstorder Median       | CD150 $\mu$ m ngtdm Strength         | 0.543  | $7.74 \times 10^{-3}$ | $3.00 \times 10^2$ |
| ADC firstorder Minimum      | CD150 $\mu$ m ngtdm Strength         | 0.542  | $7.88 \times 10^{-3}$ | $2.92 \times 10^2$ |
| ADC glszm GLNUN             | CD100 $\mu$ m glrlm LongRunEmphasis  | 0.541  | $7.93 \times 10^{-3}$ | $2.83 \times 10^2$ |
| ADC firstorder TotalEnergy  | CD150 $\mu$ m glcm Contrast          | 0.541  | $7.93 \times 10^{-3}$ | $2.82 \times 10^2$ |
| ADC glcm InverseVariance    | CD100 $\mu$ m glrlm LongRunEmphasis  | 0.539  | $8.34 \times 10^{-3}$ | $2.66 \times 10^2$ |
| ADC ngtdm Complexity        | CD50 $\mu$ m ngtdm Complexity        | 0.539  | $8.45 \times 10^{-3}$ | $2.59 \times 10^2$ |
| ADC firstorder Mean         | CD150 $\mu$ m ngtdm Strength         | 0.535  | $9.40 \times 10^{-3}$ | $2.32 \times 10^2$ |
| ADC glcm ClusterTendency    | CD50 $\mu$ m ngtdm Complexity        | 0.531  | $1.07 \times 10^{-2}$ | $2.02 \times 10^2$ |
| ADC glcm ClusterProminence  | CD50 $\mu$ m glcm Contrast           | 0.531  | $1.07 \times 10^{-2}$ | $2.00 \times 10^2$ |
| ADC firstorder Range        | CD50 $\mu$ m ngtdm Complexity        | 0.53   | $1.09 \times 10^{-2}$ | $1.95 \times 10^2$ |
| ADC firstorder TotalEnergy  | CD50 $\mu$ m glcm DifferenceAverage  | 0.53   | $1.09 \times 10^{-2}$ | $1.92 \times 10^2$ |

| <b>Radiomic ADC feature name</b>     | <b>Pathomic feature name</b>         | <b><math>\rho</math></b> | <b>Q-value</b>        | <b>BF</b>          |
|--------------------------------------|--------------------------------------|--------------------------|-----------------------|--------------------|
| ADC firstorder Maximum               | MEAN Haralick IMOC2 F12              | -0.525                   | $1.27 \times 10^{-2}$ | $1.65 \times 10^2$ |
| ADC glcm DifferenceAverage           | CD200 $\mu$ m ngtdm Strength         | 0.524                    | $1.28 \times 10^{-2}$ | $1.61 \times 10^2$ |
| ADC glcm ClusterTendency             | CD50 $\mu$ m glcm Contrast           | 0.524                    | $1.30 \times 10^{-2}$ | $1.57 \times 10^2$ |
| ADC glcm ClusterTendency             | CD50 $\mu$ m glcm DifferenceVariance | 0.523                    | $1.32 \times 10^{-2}$ | $1.53 \times 10^2$ |
| ADC glcm ClusterProminence           | MEAN Haralick IMOC2 F12              | -0.522                   | $1.35 \times 10^{-2}$ | $1.48 \times 10^2$ |
| ADC glcm ClusterTendency             | MEAN Haralick ASM F0                 | 0.521                    | $1.37 \times 10^{-2}$ | $1.45 \times 10^2$ |
| ADC glcm ClusterShade                | CD200 $\mu$ m ngtdm Strength         | 0.519                    | $1.44 \times 10^{-2}$ | $1.37 \times 10^2$ |
| ADC ngtdm Contrast                   | MEAN HaralickDifferenceVariance F9   | 0.519                    | $1.46 \times 10^{-2}$ | $1.34 \times 10^2$ |
| ADC glcm ClusterProminence           | CD100 $\mu$ m ngtdm Strength         | 0.518                    | $1.46 \times 10^{-2}$ | $1.32 \times 10^2$ |
| ADC ngtdm Strength                   | CD50 $\mu$ m ngtdm Complexity        | 0.518                    | $1.48 \times 10^{-2}$ | $1.29 \times 10^2$ |
| ADC ngtdm Complexity                 | CD50 $\mu$ m glcm DifferenceAverage  | 0.517                    | $1.49 \times 10^{-2}$ | $1.28 \times 10^2$ |
| ADC firstorder Maximum               | CD100 $\mu$ m ngtdm Strength         | 0.516                    | $1.52 \times 10^{-2}$ | $1.23 \times 10^2$ |
| ADC glcm MaximumProbability          | CD150 $\mu$ m glszm LALGLE           | 0.516                    | $1.52 \times 10^{-2}$ | $1.22 \times 10^2$ |
| ADC glcm MaximumProbability          | CD100 $\mu$ m glrlm RunVariance      | 0.515                    | $1.53 \times 10^{-2}$ | $1.20 \times 10^2$ |
| ADC firstorder MeanAbsoluteDeviation | CD50 $\mu$ m ngtdm Complexity        | 0.515                    | $1.53 \times 10^{-2}$ | $1.19 \times 10^2$ |
| ADC firstorder InterquartileRange    | CD50 $\mu$ m ngtdm Complexity        | 0.515                    | $1.53 \times 10^{-2}$ | $1.18 \times 10^2$ |
| ADC glcm ClusterShade                | MEAN Haralick IMOC2 F12              | -0.514                   | $1.57 \times 10^{-2}$ | $1.14 \times 10^2$ |
| ADC ngtdm Coarseness                 | CD200 $\mu$ m glcm JointEnergy       | 0.512                    | $1.62 \times 10^{-2}$ | $1.10 \times 10^2$ |
| ADC firstorder Range                 | CD50 $\mu$ m glcm Contrast           | 0.511                    | $1.66 \times 10^{-2}$ | $1.07 \times 10^2$ |
| ADC ngtdm Complexity                 | CD100 $\mu$ m glcm Contrast          | 0.51                     | $1.70 \times 10^{-2}$ | $1.03 \times 10^2$ |
| ADC firstorder TotalEnergy           | CD100 $\mu$ m glcm Contrast          | 0.51                     | $1.70 \times 10^{-2}$ | $1.02 \times 10^2$ |
| ADC firstorder Minimum               | MEAN HaralickDifferenceVariance F9   | 0.51                     | $1.71 \times 10^{-2}$ | $1.01 \times 10^2$ |
| ADC glcm DifferenceVariance          | MEAN HaralickDifferenceVariance F9   | 0.509                    | $1.73 \times 10^{-2}$ | $9.89 \times 10^1$ |
| ADC glcm DifferenceAverage           | MEAN Haralick IMOC2 F12              | -0.508                   | $1.73 \times 10^{-2}$ | $9.72 \times 10^1$ |
| ADC gldm SDLGLE                      | MEAN Haralick ASM F0                 | 0.508                    | $1.73 \times 10^{-2}$ | $9.71 \times 10^1$ |
| ADC firstorder MeanAbsoluteDeviation | MEAN Haralick ASM F0                 | 0.508                    | $1.75 \times 10^{-2}$ | $9.50 \times 10^1$ |
| ADC glcm ClusterShade                | CD50 $\mu$ m glcm DifferenceVariance | 0.507                    | $1.76 \times 10^{-2}$ | $9.30 \times 10^1$ |
| ADC firstorder 90Percentile          | CD150 $\mu$ m ngtdm Strength         | 0.507                    | $1.76 \times 10^{-2}$ | $9.28 \times 10^1$ |
| ADC ngtdm Contrast                   | CD150 $\mu$ m ngtdm Strength         | 0.507                    | $1.77 \times 10^{-2}$ | $9.17 \times 10^1$ |

| Radiomic ADC feature name         | Pathomic feature name                 | $\rho$ | Q-value               | BF                 |
|-----------------------------------|---------------------------------------|--------|-----------------------|--------------------|
| ADC ngtdm Complexity              | CD150 $\mu$ m glcm DifferenceAverage  | 0.502  | $2.02 \times 10^{-2}$ | $8.05 \times 10^1$ |
| ADC firstorder Maximum            | CD50 $\mu$ m glcm DifferenceVariance  | 0.501  | $2.06 \times 10^{-2}$ | $7.84 \times 10^1$ |
| ADC glszm ZoneVariance            | CD200 $\mu$ m glrlm RunVariance       | 0.5    | $2.13 \times 10^{-2}$ | $7.54 \times 10^1$ |
| ADC firstorder 10Percentile       | MEAN HaralickDifferenceVariance F9    | 0.5    | $2.13 \times 10^{-2}$ | $7.47 \times 10^1$ |
| ADC ngtdm Contrast                | CD200 $\mu$ m glcm ClusterShade       | 0.498  | $2.23 \times 10^{-2}$ | $7.09 \times 10^1$ |
| ADC gldm LDLGLE                   | CD200 $\mu$ m glrlm RunVariance       | 0.497  | $2.25 \times 10^{-2}$ | $6.94 \times 10^1$ |
| ADC firstorder Minimum            | MEAN HaralickEntropy F8               | -0.497 | $2.25 \times 10^{-2}$ | $6.90 \times 10^1$ |
| ADC firstorder 10Percentile       | MEAN HaralickEntropy F8               | -0.497 | $2.25 \times 10^{-2}$ | $6.84 \times 10^1$ |
| ADC glszm LALGLE                  | CD200 $\mu$ m glrlm RunVariance       | 0.497  | $2.25 \times 10^{-2}$ | $6.81 \times 10^1$ |
| ADC firstorder Median             | MEAN HaralickEntropy F8               | -0.497 | $2.25 \times 10^{-2}$ | $6.76 \times 10^1$ |
| ADC ngtdm Busyness                | CD200 $\mu$ m glrlm RunVariance       | 0.496  | $2.29 \times 10^{-2}$ | $6.59 \times 10^1$ |
| ADC glcm ClusterShade             | CD50 $\mu$ m ngtdm Complexity         | 0.495  | $2.31 \times 10^{-2}$ | $6.50 \times 10^1$ |
| ADC glcm ClusterShade             | CD50 $\mu$ m glcm Contrast            | 0.494  | $2.38 \times 10^{-2}$ | $6.28 \times 10^1$ |
| ADC glcm DifferenceVariance       | CD150 $\mu$ m ngtdm Strength          | 0.494  | $2.38 \times 10^{-2}$ | $6.22 \times 10^1$ |
| ADC glcm ClusterProminence        | CD150 $\mu$ m glcm DifferenceVariance | 0.492  | $2.49 \times 10^{-2}$ | $5.92 \times 10^1$ |
| ADC firstorder Mean               | MEAN HaralickEntropy F8               | -0.492 | $2.50 \times 10^{-2}$ | $5.85 \times 10^1$ |
| ADC glcm DifferenceVariance       | MEAN HaralickEntropy F8               | -0.491 | $2.55 \times 10^{-2}$ | $5.71 \times 10^1$ |
| ADC glcm ClusterProminence        | CD150 $\mu$ m glcm Contrast           | 0.49   | $2.56 \times 10^{-2}$ | $5.64 \times 10^1$ |
| ADC firstorder Median             | MEAN HaralickDifferenceVariance F9    | 0.49   | $2.57 \times 10^{-2}$ | $5.59 \times 10^1$ |
| ADC firstorder TotalEnergy        | CD150 $\mu$ m glcm DifferenceAverage  | 0.489  | $2.64 \times 10^{-2}$ | $5.40 \times 10^1$ |
| ADC ngtdm Coarseness              | CD150 $\mu$ m glcm JointEnergy        | 0.488  | $2.67 \times 10^{-2}$ | $5.31 \times 10^1$ |
| ADC firstorder Mean               | MEAN HaralickDifferenceVariance F9    | 0.488  | $2.69 \times 10^{-2}$ | $5.25 \times 10^1$ |
| ADC firstorder InterquartileRange | CD50 $\mu$ m glcm Contrast            | 0.487  | $2.71 \times 10^{-2}$ | $5.12 \times 10^1$ |
| ADC gldm DependenceVariance       | CD200 $\mu$ m glrlm RunVariance       | 0.487  | $2.71 \times 10^{-2}$ | $5.10 \times 10^1$ |
| ADC firstorder Maximum            | CD50 $\mu$ m glcm Contrast            | 0.487  | $2.71 \times 10^{-2}$ | $5.10 \times 10^1$ |
| ADC glcm ClusterProminence        | MEAN HaralickEntropy F8               | -0.486 | $2.73 \times 10^{-2}$ | $5.03 \times 10^1$ |
| ADC glcm DifferenceVariance       | CD200 $\mu$ m glcm ClusterShade       | 0.486  | $2.76 \times 10^{-2}$ | $4.95 \times 10^1$ |

| <b>Radiomic ADC feature name</b>     | <b>Pathomic feature name</b>          | <b><math>\rho</math></b> | <b>Q-value</b>        | <b>BF</b>          |
|--------------------------------------|---------------------------------------|--------------------------|-----------------------|--------------------|
| ADC firstorder Range                 | CD50 $\mu$ m glcm DifferenceVariance  | 0.485                    | 2.80 $\times 10^{-2}$ | 4.84 $\times 10^1$ |
| ADC firstorder InterquartileRange    | CD50 $\mu$ m glcm DifferenceVariance  | 0.484                    | 2.83 $\times 10^{-2}$ | 4.76 $\times 10^1$ |
| ADC ngtdm Complexity                 | CD100 $\mu$ m glcm DifferenceVariance | 0.484                    | 2.85 $\times 10^{-2}$ | 4.70 $\times 10^1$ |
| ADC firstorder TotalEnergy           | CD50 $\mu$ m ngtdm Complexity         | 0.482                    | 3.03 $\times 10^{-2}$ | 4.42 $\times 10^1$ |
| ADC glcm ClusterProminence           | CD150 $\mu$ m ngtdm Strength          | 0.481                    | 3.08 $\times 10^{-2}$ | 4.29 $\times 10^1$ |
| ADC glcm Imc2                        | CD200 $\mu$ m glrlm RunVariance       | -0.481                   | 3.08 $\times 10^{-2}$ | 4.29 $\times 10^1$ |
| ADC firstorder InterquartileRange    | MEAN Haralick ASM F0                  | 0.48                     | 3.11 $\times 10^{-2}$ | 4.22 $\times 10^1$ |
| ADC firstorder MeanAbsoluteDeviation | CD50 $\mu$ m glcm DifferenceVariance  | 0.48                     | 3.12 $\times 10^{-2}$ | 4.19 $\times 10^1$ |
| ADC firstorder MeanAbsoluteDeviation | CD50 $\mu$ m glcm Contrast            | 0.479                    | 3.16 $\times 10^{-2}$ | 4.11 $\times 10^1$ |
| ADC firstorder 90Percentile          | MEAN HaralickEntropy F8               | -0.478                   | 3.25 $\times 10^{-2}$ | 3.98 $\times 10^1$ |
| ADC firstorder 90Percentile          | CD50 $\mu$ m glcm DifferenceVariance  | 0.475                    | 3.54 $\times 10^{-2}$ | 3.66 $\times 10^1$ |
| ADC firstorder 90Percentile          | MEAN HaralickDifferenceVariance F9    | 0.475                    | 3.55 $\times 10^{-2}$ | 3.62 $\times 10^1$ |
| ADC firstorder Median                | CD50 $\mu$ m glcm DifferenceVariance  | 0.474                    | 3.60 $\times 10^{-2}$ | 3.56 $\times 10^1$ |
| ADC firstorder TotalEnergy           | CD100 $\mu$ m glcm DifferenceVariance | 0.474                    | 3.62 $\times 10^{-2}$ | 3.51 $\times 10^1$ |
| ADC gldm LDHGLE                      | CD50 $\mu$ m glcm Contrast            | 0.473                    | 3.65 $\times 10^{-2}$ | 3.47 $\times 10^1$ |
| ADC firstorder Mean                  | CD50 $\mu$ m glcm DifferenceVariance  | 0.472                    | 3.81 $\times 10^{-2}$ | 3.31 $\times 10^1$ |
| ADC firstorder 10Percentile          | CD200 $\mu$ m glcm ClusterShade       | 0.47                     | 3.94 $\times 10^{-2}$ | 3.19 $\times 10^1$ |
| ADC ngtdm Contrast                   | MEAN HaralickEntropy F8               | -0.47                    | 3.97 $\times 10^{-2}$ | 3.15 $\times 10^1$ |
| ADC ngtdm Complexity                 | CD150 $\mu$ m glcm DifferenceVariance | 0.468                    | 4.09 $\times 10^{-2}$ | 3.05 $\times 10^1$ |
| ADC glcm DifferenceAverage           | CD50 $\mu$ m glcm DifferenceVariance  | 0.468                    | 4.12 $\times 10^{-2}$ | 3.01 $\times 10^1$ |
| ADC ngtdm Strength                   | MEAN Haralick IMOC2 F12               | -0.467                   | 4.15 $\times 10^{-2}$ | 2.95 $\times 10^1$ |
| ADC glcm ClusterProminence           | CD50 $\mu$ m ngtdm Complexity         | 0.467                    | 4.15 $\times 10^{-2}$ | 2.95 $\times 10^1$ |
| ADC firstorder 10Percentile          | CD50 $\mu$ m ngtdm Strength           | 0.467                    | 4.15 $\times 10^{-2}$ | 2.93 $\times 10^1$ |
| ADC glcm ClusterShade                | CD100 $\mu$ m ngtdm Strength          | 0.467                    | 4.15 $\times 10^{-2}$ | 2.92 $\times 10^1$ |
| ADC gldm LDHGLE                      | CD200 $\mu$ m ngtdm Strength          | 0.466                    | 4.24 $\times 10^{-2}$ | 2.85 $\times 10^1$ |
| ADC firstorder Mean                  | CD200 $\mu$ m glcm ClusterShade       | 0.465                    | 4.35 $\times 10^{-2}$ | 2.75 $\times 10^1$ |
| ADC glcm DifferenceAverage           | CD50 $\mu$ m ngtdm Complexity         | 0.465                    | 4.35 $\times 10^{-2}$ | 2.75 $\times 10^1$ |
| ADC glcm ClusterProminence           | CD100 $\mu$ m glcm DifferenceVariance | 0.464                    | 4.35 $\times 10^{-2}$ | 2.73 $\times 10^1$ |
| ADC firstorder Range                 | CD50 $\mu$ m glcm DifferenceAverage   | 0.463                    | 4.44 $\times 10^{-2}$ | 2.65 $\times 10^1$ |

| Radiomic ADC feature name   | Pathomic feature name                | $\rho$ | Q-value               | BF                 |
|-----------------------------|--------------------------------------|--------|-----------------------|--------------------|
| ADC glrlm RunVariance       | CD200 $\mu$ m glrlm RunVariance      | 0.463  | $4.44 \times 10^{-2}$ | $2.65 \times 10^1$ |
| ADC gldm LDHGLE             | MEAN Haralick ASM F0                 | 0.463  | $4.44 \times 10^{-2}$ | $2.63 \times 10^1$ |
| ADC firstorder 90Percentile | CD200 $\mu$ m glcm ClusterShade      | 0.463  | $4.44 \times 10^{-2}$ | $2.62 \times 10^1$ |
| ADC firstorder Median       | CD200 $\mu$ m glcm ClusterShade      | 0.463  | $4.45 \times 10^{-2}$ | $2.60 \times 10^1$ |
| ADC firstorder TotalEnergy  | CD100 $\mu$ m glcm DifferenceAverage | 0.462  | $4.56 \times 10^{-2}$ | $2.53 \times 10^1$ |
| ADC glcm DifferenceAverage  | CD100 $\mu$ m ngtdm Strength         | 0.461  | $4.67 \times 10^{-2}$ | $2.46 \times 10^1$ |
| ADC ngtdm Coarseness        | CD50 $\mu$ m glcm Idmn               | -0.459 | $4.78 \times 10^{-2}$ | $2.39 \times 10^1$ |
| ADC glcm JointAverage       | CD50 $\mu$ m glcm Contrast           | 0.459  | $4.78 \times 10^{-2}$ | $2.36 \times 10^1$ |
| ADC ngtdm Complexity        | MEAN Cytoplasm EosinODMin            | 0.459  | $4.78 \times 10^{-2}$ | $2.36 \times 10^1$ |
| ADC firstorder 10Percentile | MEAN HaralickSumEntropy F7           | -0.458 | $4.78 \times 10^{-2}$ | $2.33 \times 10^1$ |
| ADC glcm ClusterShade       | MEAN HaralickEntropy F8              | -0.458 | $4.78 \times 10^{-2}$ | $2.33 \times 10^1$ |
| ADC glcm MaximumProbability | MEAN Haralick IMOC2 F12              | -0.458 | $4.78 \times 10^{-2}$ | $2.33 \times 10^1$ |
| ADC firstorder Median       | MEAN HaralickSumEntropy F7           | -0.458 | $4.78 \times 10^{-2}$ | $2.32 \times 10^1$ |
| ADC glcm SumEntropy         | MEAN Haralick IMOC2 F12              | 0.458  | $4.78 \times 10^{-2}$ | $2.31 \times 10^1$ |
| ADC firstorder Minimum      | MEAN HaralickSumEntropy F7           | -0.458 | $4.79 \times 10^{-2}$ | $2.29 \times 10^1$ |
| ADC firstorder Maximum      | CD150 $\mu$ m ngtdm Strength         | 0.457  | $4.81 \times 10^{-2}$ | $2.27 \times 10^1$ |
| ADC firstorder Minimum      | CD50 $\mu$ m ngtdm Strength          | 0.457  | $4.81 \times 10^{-2}$ | $2.27 \times 10^1$ |
| ADC glcm DifferenceAverage  | CD50 $\mu$ m glcm Contrast           | 0.457  | $4.85 \times 10^{-2}$ | $2.24 \times 10^1$ |
| ADC glcm ClusterProminence  | MEAN HaralickDifferenceVariance F9   | 0.456  | $4.94 \times 10^{-2}$ | $2.17 \times 10^1$ |
| ADC firstorder Maximum      | CD50 $\mu$ m ngtdm Complexity        | 0.456  | $4.94 \times 10^{-2}$ | $2.17 \times 10^1$ |
| ADC glcm ClusterShade       | MEAN HaralickDifferenceVariance F9   | 0.456  | $4.94 \times 10^{-2}$ | $2.17 \times 10^1$ |

**Table S4** Summary of the significantly moderately correlated radiomic-pathomic features, with radiomic features extracted from T1C. Abbreviations: DNU = Dependence non uniformity; GLNU = gray-level non-uniformity; IMOC = Information Measure Of Correlation; ASM = Angular Second Moment; SRLGLE = Short Run Low Gray Level Emphasis; SDLGLE = Small Dependence Low Gray Level Emphasis; T1C = post-contrast T1; SALGLE = Small Area Low Gray Level Emphasis; LALGLE = Large Area Low Gray Level Emphasis; glcm = gray level co-occurrence matrix; gldm = Gray Level Dependence Matrix; glszm = Gray Level Size Zone Matrix; ngtdm = Neighbouring Gray Tone Difference Matrix; glrlm = Gray Level Run Length Matrix.

| <b>Radiomic T1C feature name</b> | <b>Pathomic feature name</b>         | <b><math>\rho</math></b> | <b>FDR q-value</b>    | <b>BF</b>          |
|----------------------------------|--------------------------------------|--------------------------|-----------------------|--------------------|
| T1C glszm SALGLE                 | CD200 $\mu$ m ngtdm Strength         | 0.599                    | 4.44 $\times 10^{-3}$ | 2.59 $\times 10^3$ |
| T1C glcm JointEnergy             | MEAN Haralick ASM F0                 | 0.597                    | 4.66 $\times 10^{-3}$ | 2.33 $\times 10^3$ |
| T1C firstorder RootMeanSquared   | CD150 $\mu$ m gldm DNU               | -0.594                   | 4.91 $\times 10^{-3}$ | 2.11 $\times 10^3$ |
| T1C glszm SALGLE                 | MEAN Haralick IMOC2 F12              | -0.591                   | 5.27 $\times 10^{-3}$ | 1.86 $\times 10^3$ |
| T1C glcm MaximumProbability      | MEAN Haralick IMOC2 F12              | -0.59                    | 5.27 $\times 10^{-3}$ | 1.78 $\times 10^3$ |
| T1C glszm SALGLE                 | MEAN Haralick ASM F0                 | 0.586                    | 5.63 $\times 10^{-3}$ | 1.54 $\times 10^3$ |
| T1C firstorder 10Percentile      | CD150 $\mu$ m gldm DNU               | -0.586                   | 5.63 $\times 10^{-3}$ | 1.53 $\times 10^3$ |
| T1C firstorder 90Percentile      | CD150 $\mu$ m glcm Imc2              | 0.578                    | 7.49 $\times 10^{-3}$ | 1.11 $\times 10^3$ |
| T1C firstorder 10Percentile      | CD200 $\mu$ m glcm Imc2              | 0.577                    | 7.49 $\times 10^{-3}$ | 1.05 $\times 10^3$ |
| T1C gldm SDLGLE                  | MEAN Haralick IMOC2 F12              | -0.576                   | 7.49 $\times 10^{-3}$ | 1.03 $\times 10^3$ |
| T1C gldm SDLGLE                  | MEAN Haralick ASM F0                 | 0.576                    | 7.49 $\times 10^{-3}$ | 9.98 $\times 10^2$ |
| T1C glcm MaximumProbability      | CD200 $\mu$ m ngtdm Strength         | 0.572                    | 8.45 $\times 10^{-3}$ | 8.59 $\times 10^2$ |
| T1C glrlm SRLGLE                 | CD200 $\mu$ m ngtdm Strength         | 0.57                     | 8.52 $\times 10^{-3}$ | 8.15 $\times 10^2$ |
| T1C firstorder 10Percentile      | CD100 $\mu$ m ngtdm Busyness         | -0.57                    | 8.52 $\times 10^{-3}$ | 7.97 $\times 10^2$ |
| T1C firstorder RootMeanSquared   | CD100 $\mu$ m ngtdm Busyness         | -0.569                   | 8.56 $\times 10^{-3}$ | 7.69 $\times 10^2$ |
| T1C firstorder 10Percentile      | CD150 $\mu$ m glcm Imc2              | 0.562                    | 1.01 $\times 10^{-2}$ | 6.00 $\times 10^2$ |
| T1C firstorder 90Percentile      | CD150 $\mu$ m gldm DNU               | -0.562                   | 1.01 $\times 10^{-2}$ | 5.96 $\times 10^2$ |
| T1C glrlm SRLGLE                 | MEAN Haralick IMOC2 F12              | -0.561                   | 1.01 $\times 10^{-2}$ | 5.78 $\times 10^2$ |
| T1C firstorder 10Percentile      | CD200 $\mu$ m ngtdm Strength         | 0.561                    | 1.01 $\times 10^{-2}$ | 5.78 $\times 10^2$ |
| T1C firstorder Minimum           | CD200 $\mu$ m ngtdm Strength         | 0.561                    | 1.01 $\times 10^{-2}$ | 5.70 $\times 10^2$ |
| T1C glrlm SRLGLE                 | MEAN Haralick ASM F0                 | 0.554                    | 1.26 $\times 10^{-2}$ | 4.49 $\times 10^2$ |
| T1C glcm MaximumProbability      | MEAN Haralick ASM F0                 | 0.545                    | 1.76 $\times 10^{-2}$ | 3.20 $\times 10^2$ |
| T1C firstorder Kurtosis          | CD150 $\mu$ m gldm DNU               | 0.539                    | 2.09 $\times 10^{-2}$ | 2.66 $\times 10^2$ |
| T1C ngtdm Coarseness             | CD100 $\mu$ m ngtdm Strength         | 0.537                    | 2.21 $\times 10^{-2}$ | 2.42 $\times 10^2$ |
| T1C glcm Idn                     | CD200 $\mu$ m ngtdm Strength         | -0.536                   | 2.21 $\times 10^{-2}$ | 2.40 $\times 10^2$ |
| T1C firstorder RootMeanSquared   | CD200 $\mu$ m firstorder TotalEnergy | -0.533                   | 2.40 $\times 10^{-2}$ | 2.14 $\times 10^2$ |
| T1C firstorder 10Percentile      | CD200 $\mu$ m firstorder TotalEnergy | -0.533                   | 2.40 $\times 10^{-2}$ | 2.13 $\times 10^2$ |
| T1C glszm SALGLE                 | CD100 $\mu$ m ngtdm Strength         | 0.531                    | 2.50 $\times 10^{-2}$ | 2.00 $\times 10^2$ |
| T1C gldm SDLGLE                  | CD100 $\mu$ m ngtdm Strength         | 0.529                    | 2.62 $\times 10^{-2}$ | 1.87 $\times 10^2$ |

| Radiomic TIC feature name   | Pathomic feature name        | $\rho$ | FDR q-value           | BF                 |
|-----------------------------|------------------------------|--------|-----------------------|--------------------|
| T1C glszm LALGLE            | CD200 $\mu$ m glcm Imc2      | -0.525 | $2.91 \times 10^{-2}$ | $1.67 \times 10^2$ |
| T1C firstorder 90Percentile | CD100 $\mu$ m ngtdm Busyness | -0.523 | $3.09 \times 10^{-2}$ | $1.54 \times 10^2$ |
| T1C glcm InverseVariance    | CD150 $\mu$ m glszm GLNU     | 0.522  | $3.10 \times 10^{-2}$ | $1.48 \times 10^2$ |
| T1C glcm InverseVariance    | CD200 $\mu$ m glcm Imc2      | -0.522 | $3.10 \times 10^{-2}$ | $1.48 \times 10^2$ |
| T1C firstorder Kurtosis     | CD150 $\mu$ m glszm GLNU     | 0.516  | $3.64 \times 10^{-2}$ | $1.25 \times 10^2$ |
| T1C glcm JointEnergy        | CD100 $\mu$ m ngtdm Strength | 0.514  | $3.87 \times 10^{-2}$ | $1.16 \times 10^2$ |
| T1C glcm InverseVariance    | CD50 $\mu$ m ngtdm Busyness  | 0.51   | $4.32 \times 10^{-2}$ | $1.03 \times 10^2$ |
| T1C glszm LALGLE            | CD150 $\mu$ m glcm Imc2      | -0.508 | $4.59 \times 10^{-2}$ | $9.51 \times 10^1$ |
| T1C gldm DependenceVariance | CD150 $\mu$ m glszm GLNU     | 0.506  | $4.70 \times 10^{-2}$ | $9.13 \times 10^1$ |

### 3 Factor analysis

**Table S5** ADC factor loadings for the five ADC factors. A darker grey in the column cell correspond to a higher loadings measuring the association between features and factors. Abbreviations: ADC = Apparent Diffusion Coefficient; LALGLE = Large Area Low Gray Level Emphasis; LDLGLE = Large Dependence Low Gray Level Emphasis; LDHGLE = Large Dependence High Gray Level Emphasis; SDLGLE = Small Dependence Low Gray Level Emphasis; LALGLE = Large Area Low Gray Level Emphasis; GLNUN = Gray level non uniformity normalized; SZNU = Size Zone Non-Uniformity; glcm = gray level co-occurrence matrix; gldm = Gray Level Dependence Matrix; glszm = Gray Level Size Zone Matrix; ngtdm = Neighbouring Gray Tone Difference Matrix; glrlm = Gray Level Run Length Matrix; F = Factor.

| Radiomic ADC feature                 | ADC_F1 | ADC_F2 | ADC_F3 | ADC_F4 | ADC_F5 |
|--------------------------------------|--------|--------|--------|--------|--------|
| ADC firstorder MeanAbsoluteDeviation | 0.857  | -0.106 | -0.114 | 0.241  | -0.016 |
| ADC firstorder Maximum               | 0.902  | -0.088 | -0.029 | -0.004 | 0.002  |
| ADC firstorder Minimum               | 0.814  | -0.03  | -0.137 | -0.309 | -0.068 |
| ADC firstorder Kurtosis              | -0.027 | -0.006 | 0.48   | -0.09  | 0.057  |
| ADC firstorder 10Percentile          | 0.86   | -0.057 | -0.065 | -0.251 | -0.051 |
| ADC firstorder InterquartileRange    | 0.836  | -0.112 | -0.144 | 0.286  | 0.013  |
| ADC firstorder Median                | 0.876  | -0.068 | -0.076 | -0.184 | -0.027 |
| ADC firstorder 90Percentile          | 0.892  | -0.076 | -0.085 | -0.102 | -0.046 |
| ADC firstorder Skewness              | 0.121  | 0.09   | 0.243  | 0.141  | -0.116 |



| <i>Radiomic ADC feature</i>      | <i>ADC_F1</i> | <i>ADC_F2</i> | <i>ADC_F3</i> | <i>ADC_F4</i> | <i>ADC_F5</i> |
|----------------------------------|---------------|---------------|---------------|---------------|---------------|
| ADC firstorder Range             | 0.82          | -0.13         | 0.083         | 0.307         | 0.073         |
| ADC firstorder Mean              | 0.881         | -0.069        | -0.076        | -0.17         | -0.035        |
| ADC firstorder TotalEnergy       | 0.554         | -0.042        | 0.194         | 0.331         | 0.491         |
| ADC gldm LDLGLE                  | -0.002        | 0.898         | -0.099        | -0.012        | -0.034        |
| ADC gldm DependenceEntropy       | -0.008        | -0.217        | 0.49          | 0.721         | 0.068         |
| ADC gldm GLNU                    | -0.148        | 0.637         | 0.559         | -0.135        | -0.024        |
| ADC gldm LDHGLE                  | 0.814         | -0.066        | 0.089         | 0.131         | 0.103         |
| ADC gldm DependenceVariance      | -0.16         | 0.867         | 0.11          | -0.079        | -0.006        |
| ADC gldm SDLGLE                  | 0.501         | 0.202         | -0.497        | -0.424        | -0.16         |
| ADC ngtdm Busyness               | -0.043        | 0.899         | -0.054        | -0.033        | -0.027        |
| ADC ngtdm Strength               | 0.845         | -0.068        | -0.184        | 0.161         | 0.015         |
| ADC ngtdm Coarseness             | -0.263        | -0.027        | -0.677        | -0.292        | 0.157         |
| ADC ngtdm Complexity             | 0.588         | -0.022        | -0.034        | 0.393         | 0.559         |
| ADC ngtdm Contrast               | 0.777         | -0.007        | -0.087        | -0.369        | -0.273        |
| ADC glrlm RunLengthNonUniformity | -0.038        | -0.025        | 0.835         | 0.178         | -0.058        |
| ADC glrlm RunVariance            | -0.206        | 0.853         | 0.107         | -0.135        | 0.025         |
| ADC glcm Imc2                    | 0.041         | -0.901        | -0.021        | 0.028         | 0.017         |
| ADC glcm DifferenceVariance      | 0.873         | -0.019        | -0.109        | -0.184        | -0.113        |
| ADC glcm InverseVariance         | -0.324        | 0.783         | 0.031         | -0.269        | 0.083         |
| ADC glcm Imc1                    | -0.382        | 0.346         | 0.678         | -0.236        | 0.03          |
| ADC glcm JointEntropy            | -0.198        | -0.2          | 0.774         | 0.355         | 0.029         |
| ADC glcm ClusterShade            | 0.874         | -0.014        | -0.074        | 0.039         | 0.138         |
| ADC glcm Correlation             | -0.402        | 0.056         | 0.327         | 0.297         | 0.089         |
| ADC glcm DifferenceEntropy       | 0.136         | -0.451        | 0.198         | 0.729         | 0.068         |
| ADC glcm SumEntropy              | -0.084        | -0.338        | 0.491         | 0.65          | 0.066         |
| ADC glcm ClusterTendency         | 0.859         | -0.038        | -0.104        | 0.192         | 0.165         |
| ADC glcm JointAverage            | 0.71          | -0.157        | 0.112         | 0.326         | 0.088         |
| ADC glcm MaximumProbability      | 0.25          | 0.629         | -0.453        | -0.344        | -0.081        |
| ADC glcm ClusterProminence       | 0.878         | -0.009        | -0.089        | -0.03         | 0.2           |
| ADC glcm Idn                     | -0.241        | -0.016        | 0.757         | 0.106         | 0.078         |
| ADC glcm DifferenceAverage       | 0.882         | -0.092        | -0.145        | 0.095         | -0.049        |
| ADC glcm Idmn                    | -0.387        | -0.01         | 0.71          | 0.128         | 0.161         |
| ADC glszm ZoneVariance           | -0.061        | 0.905         | -0.006        | -0.014        | -0.019        |

| <i>Radiomic ADC feature</i> | <i>ADC_F1</i> | <i>ADC_F2</i> | <i>ADC_F3</i> | <i>ADC_F4</i> | <i>ADC_F5</i> |
|-----------------------------|---------------|---------------|---------------|---------------|---------------|
| ADC glszm ZoneEntropy       | 0.038         | -0.302        | 0.413         | 0.74          | 0.067         |
| ADC glszm LALGLE            | -0.006        | 0.899         | -0.092        | -0.005        | -0.033        |
| ADC glszm GLNUN             | -0.046        | 0.806         | -0.161        | -0.364        | 0.027         |
| ADC glszm SZNU              | 0.015         | -0.116        | 0.774         | 0.294         | -0.048        |

**Table S6** TIC factor loadings for the 8 TIC factors. A darker grey in the column cell correspond to a higher loading measuring the association between features and factors. Abbreviations: TIC = post-contrast T1; F = Factor; glcm = gray level co-occurrence matrix; gldm = Gray Level Dependence Matrix; glszm = Gray Level Size Zone Matrix; ngtdm = Neighbouring Gray Tone Difference Matrix; glrlm = Gray Level Run Length Matrix.

| <i>Radiomic TIC feature</i>                   | <i>TIC_F1</i> | <i>TIC_F2</i> | <i>TIC_F3</i> | <i>TIC_F4</i> | <i>TIC_F5</i> | <i>TIC_F6</i> | <i>TIC_F7</i> | <i>TIC_F8</i> |
|-----------------------------------------------|---------------|---------------|---------------|---------------|---------------|---------------|---------------|---------------|
| TIC glrlm RunPercentage                       | 0.432         | -0.104        | -0.241        | -0.747        | 0.158         | -0.166        | -0.251        | -0.069        |
| TIC glrlm GrayLevelNonUniformity              | -0.25         | 0.226         | 0.746         | 0.481         | -0.093        | 0.071         | -0.06         | 0.056         |
| TIC glrlm RunLengthNonUniformity              | 0.044         | 0.29          | 0.897         | 0.204         | -0.045        | 0.004         | -0.004        | 0.053         |
| TIC glrlm RunEntropy                          | 0.776         | 0.522         | 0.079         | -0.166        | 0.015         | -0.148        | -0.01         | -0.009        |
| TIC glrlm ShortRunLowGrayLevelEmphasis        | -0.171        | -0.856        | -0.291        | 0.026         | 0.061         | -0.148        | 0.11          | -0.184        |
| TIC gldm SmallDependenceLowGrayLevelEmphasis  | -0.102        | -0.87         | -0.287        | -0.07         | 0.073         | -0.17         | 0.028         | -0.13         |
| TIC gldm DependenceEntropy                    | 0.327         | 0.704         | 0.416         | 0.275         | -0.094        | 0.002         | 0.262         | 0.041         |
| TIC gldm SmallDependenceHighGrayLevelEmphasis | 0.825         | 0.19          | 0.157         | -0.239        | 0.145         | 0.073         | -0.085        | 0.264         |
| TIC gldm DependenceNonUniformity              | 0.278         | 0.289         | 0.875         | -0.088        | -0.004        | 0.044         | -0.045        | 0.011         |
| TIC gldm LargeDependenceLowGrayLevelEmphasis  | -0.322        | -0.356        | -0.138        | 0.673         | -0.134        | 0.045         | 0.269         | -0.268        |
| TIC gldm LargeDependenceHighGrayLevelEmphasis | 0.285         | 0.354         | 0.544         | 0.185         | 0.028         | -0.087        | 0.156         | 0.588         |
| TIC gldm DependenceVariance                   | -0.385        | 0.087         | 0.183         | 0.781         | -0.154        | 0.208         | 0.215         | 0.055         |
| TIC glcm SumSquares                           | 0.936         | 0.156         | -0.09         | -0.118        | 0.049         | -0.045        | 0.046         | -0.009        |
| TIC glcm JointAverage                         | 0.675         | 0.336         | 0.296         | -0.254        | 0.122         | -0.067        | -0.079        | 0.43          |
| TIC glcm Idn                                  | -0.044        | 0.569         | 0.454         | 0.248         | -0.203        | 0.434         | 0.206         | 0.149         |
| TIC glcm Imc2                                 | 0.402         | -0.166        | -0.673        | -0.376        | 0.077         | -0.044        | -0.027        | -0.071        |
| TIC glcm ClusterShade                         | 0.551         | 0.03          | 0.033         | -0.056        | -0.031        | 0.497         | -0.04         | -0.044        |
| TIC glcm Correlation                          | 0.081         | 0.495         | 0.173         | 0.336         | -0.202        | -0.005        | 0.456         | 0.021         |
| TIC glcm Imc1                                 | -0.251        | 0.479         | 0.684         | 0.213         | -0.055        | 0.113         | 0.257         | 0.061         |
| TIC glcm ClusterTendency                      | 0.917         | 0.172         | -0.053        | -0.078        | 0.034         | -0.061        | 0.152         | 0             |

| <i>Radiomic TIC feature</i>                | <i>TIC_F1</i> | <i>TIC_F2</i> | <i>TIC_F3</i> | <i>TIC_F4</i> | <i>TIC_F5</i> | <i>TIC_F6</i> | <i>TIC_F7</i> | <i>TIC_F8</i> |
|--------------------------------------------|---------------|---------------|---------------|---------------|---------------|---------------|---------------|---------------|
| T1C glcm InverseVariance                   | -0.599        | -0.04         | 0.147         | 0.57          | -0.182        | 0.275         | 0.32          | 0.041         |
| T1C glcm SumEntropy                        | 0.649         | 0.655         | 0.191         | -0.122        | -0.018        | -0.103        | 0.13          | -0.033        |
| T1C glcm ClusterProminence                 | 0.902         | 0.063         | 0.022         | 0.009         | 0.066         | 0.155         | 0.163         | 0.039         |
| T1C glcm MaximumProbability                | -0.299        | -0.858        | -0.253        | 0.136         | 0.025         | 0.047         | -0.022        | 0.067         |
| T1C glcm DifferenceVariance                | 0.87          | 0.114         | -0.118        | -0.17         | 0.035         | 0.083         | -0.166        | -0.02         |
| T1C glcm JointEnergy                       | -0.207        | -0.912        | -0.181        | 0.06          | 0.076         | 0.005         | -0.025        | 0.055         |
| T1C glcm DifferenceEntropy                 | 0.745         | 0.37          | -0.035        | -0.391        | 0.105         | -0.147        | -0.193        | -0.039        |
| T1C glcm JointEntropy                      | 0.385         | 0.657         | 0.542         | -0.058        | 0.001         | -0.045        | 0.179         | 0.024         |
| T1C firstorder RootMeanSquared             | 0.428         | -0.048        | 0.021         | -0.282        | 0.797         | -0.19         | -0.045        | 0.091         |
| T1C firstorder Kurtosis                    | -0.128        | 0.091         | 0.148         | 0.131         | -0.161        | 0.793         | 0.013         | 0.131         |
| T1C firstorder Maximum                     | 0.757         | 0.163         | 0.143         | -0.282        | 0.419         | 0.169         | -0.08         | -0.017        |
| T1C firstorder 10Percentile                | 0.111         | -0.151        | 0.081         | -0.234        | 0.902         | -0.105        | -0.065        | 0.11          |
| T1C firstorder Skewness                    | 0.186         | 0.16          | -0.098        | 0.12          | -0.231        | 0.689         | 0.015         | -0.212        |
| T1C firstorder Range                       | 0.784         | 0.331         | 0.247         | -0.224        | 0.01          | 0.257         | -0.087        | 0.106         |
| T1C firstorder InterquartileRange          | 0.84          | 0.235         | -0.163        | -0.201        | 0.022         | -0.289        | 0.059         | -0.018        |
| T1C firstorder 90Percentile                | 0.61          | 0.024         | -0.018        | -0.288        | 0.663         | -0.205        | -0.044        | 0.056         |
| T1C firstorder Minimum                     | -0.117        | -0.354        | -0.223        | -0.093        | 0.799         | -0.188        | 0.022         | -0.253        |
| T1C firstorder TotalEnergy                 | 0.169         | 0.299         | 0.855         | 0.101         | 0.201         | -0.03         | 0.069         | 0.11          |
| T1C ngtdm Complexity                       | 0.879         | 0.137         | 0.142         | -0.122        | 0.07          | 0.212         | -0.03         | 0.044         |
| T1C ngtdm Strength                         | 0.551         | -0.223        | -0.598        | -0.167        | -0.055        | 0.014         | -0.171        | 0.04          |
| T1C ngtdm Coarseness                       | -0.095        | -0.899        | -0.282        | -0.06         | 0.075         | -0.115        | 0.002         | 0.046         |
| T1C ngtdm Busyness                         | -0.445        | 0.195         | 0.539         | 0.535         | -0.088        | -0.012        | 0.019         | -0.231        |
| T1C ngtdm Contrast                         | 0.555         | -0.193        | -0.511        | -0.228        | 0.092         | -0.314        | -0.262        | -0.069        |
| T1C glszm ZoneVariance                     | -0.173        | 0.057         | 0.141         | 0.889         | -0.153        | 0.017         | -0.17         | 0.007         |
| T1C glszm SizeZoneNonUniformity            | 0.323         | 0.28          | 0.845         | -0.175        | 0.007         | 0.049         | -0.045        | 0.002         |
| T1C glszm SmallAreaLowGrayLevelEmphasis    | -0.134        | -0.879        | -0.258        | -0.022        | 0.05          | -0.152        | 0.071         | -0.116        |
| T1C glszm ZoneEntropy                      | 0.407         | 0.715         | 0.397         | 0.218         | -0.088        | -0.01         | 0.176         | 0.053         |
| T1C glszm LargeAreaLowGrayLevelEmphasis    | -0.252        | -0.181        | -0.008        | 0.852         | -0.172        | 0.046         | -0.003        | -0.122        |
| T1C glszm GrayLevelNonUniformityNormalized | -0.691        | -0.566        | -0.008        | 0.237         | -0.009        | 0.214         | 0.133         | 0.022         |
| T1C glszm LargeAreaHighGrayLevelEmphasis   | 0.012         | 0.215         | 0.397         | 0.759         | -0.065        | -0.063        | -0.104        | 0.3           |
| T1C glszm GrayLevelVariance                | 0.939         | 0.178         | -0.052        | -0.11         | 0.065         | -0.016        | 0.021         | 0.032         |
| T1C glszm GrayLevelNonUniformity           | -0.149        | 0.276         | 0.899         | 0.1           | -0.066        | 0.066         | -0.024        | 0.031         |
| T1C glszm SizeZoneNonUniformityNormalized  | 0.507         | -0.177        | -0.325        | -0.552        | 0.17          | -0.095        | -0.404        | -0.116        |

**Table S7** Factor loadings for the 19 pathomic factors. A darker grey in the column cell correspond to a higher loadings measuring the association between features and factors. Abbreviations: P = Pathomic; F = Factor; CD = Cellular Density; OD = Optical Density; glcm = gray level co-occurrence matrix; gldm = Gray Level Dependence Matrix; glszm = Gray Level Size Zone Matrix; ngtdm = Neighbouring Gray Tone Difference Matrix; glrlm = Gray Level Run Length Matrix.

| <i>Pathomic feature name</i>     | <i>P_F1</i> | <i>P_F2</i> | <i>P_F3</i> | <i>P_F4</i> | <i>P_F5</i> | <i>P_F6</i> | <i>P_F7</i> | <i>P_F8</i> | <i>P_F9</i> | <i>P_F10</i> | <i>P_F11</i> | <i>P_F12</i> | <i>P_F13</i> | <i>P_F14</i> | <i>P_F15</i> | <i>P_F16</i> | <i>P_F17</i> | <i>P_F18</i> | <i>P_F19</i> |
|----------------------------------|-------------|-------------|-------------|-------------|-------------|-------------|-------------|-------------|-------------|--------------|--------------|--------------|--------------|--------------|--------------|--------------|--------------|--------------|--------------|
| MEAN Nucleus Area                | 0.205       | -0.136      | 0.007       | -0.001      | -0.036      | 0.13        | 0.013       | 0.096       | -0.846      | -0.077       | -0.071       | 0.029        | -0.024       | -0.027       | 0.027        | 0.039        | 0.003        | -0.012       | -0.011       |
| MEAN Nucleus Perimeter           | 0.266       | -0.053      | 0.052       | 0.055       | 0.02        | 0.118       | -0.04       | 0.064       | -0.814      | -0.116       | -0.044       | -0.004       | -0.008       | 0.196        | 0.004        | 0.058        | 0.017        | 0.005        | 0.005        |
| MEAN Nucleus Circularity         | -0.246      | -0.258      | -0.096      | -0.112      | -0.197      | -0.032      | 0.029       | 0.063       | 0.226       | 0.173        | -0.105       | 0.136        | -0.006       | -0.684       | 0.06         | -0.039       | -0.044       | -0.009       | -0.015       |
| MEAN Nucleus MaxCaliper          | 0.312       | -0.035      | 0.108       | 0.02        | 0.07        | 0.085       | -0.051      | 0.057       | -0.758      | -0.143       | -0.08        | -0.005       | -0.01        | 0.276        | 0.004        | 0.097        | -0.015       | 0.02         | 0.005        |
| MEAN Nucleus MinCaliper          | 0.093       | -0.159      | -0.092      | 0.058       | -0.098      | 0.139       | -0.005      | 0.105       | -0.822      | -0.033       | -0.001       | 0.048        | -0.005       | -0.171       | 0.034        | -0.042       | 0.054        | -0.016       | -0.019       |
| MEAN Nucleus Eccentricity        | 0.353       | 0.274       | 0.149       | 0.044       | 0.289       | -0.047      | -0.013      | -0.053      | -0.06       | -0.334       | -0.091       | -0.093       | -0.041       | 0.555        | -0.088       | 0.092        | -0.114       | -0.016       | -0.012       |
| MEAN Nucleus HematoxylinODMean   | 0.274       | 0.07        | 0.131       | -0.007      | 0.419       | 0.003       | 0.738       | 0.024       | 0.084       | -0.033       | 0.004        | -0.049       | -0.013       | -0.065       | 0.014        | 0.017        | -0.002       | -0.035       | -0.009       |
| MEAN Nucleus HematoxylinODSum    | 0.328       | -0.042      | 0.125       | -0.024      | 0.393       | 0.102       | 0.674       | 0.072       | -0.249      | -0.023       | 0.001        | -0.054       | -0.039       | -0.057       | 0.009        | 0.019        | 0.002        | 0.001        | 0.004        |
| MEAN Nucleus HematoxylinODStdDev | 0.15        | 0.011       | 0.069       | -0.056      | 0.5         | -0.039      | 0.646       | 0.017       | 0.229       | -0.108       | -0.031       | -0.063       | 0.013        | 0.124        | -0.015       | 0.01         | 0.017        | -0.033       | -0.098       |
| MEAN Nucleus HematoxylinODMin    | 0.337       | 0.117       | 0.17        | 0.017       | 0.266       | 0.031       | 0.717       | 0.021       | -0.023      | 0.042        | 0.025        | -0.022       | -0.005       | -0.194       | 0.051        | 0.035        | -0.058       | -0.051       | 0.094        |
| MEAN Nucleus HematoxylinODRange  | 0.18        | -0.016      | 0.049       | -0.003      | 0.503       | -0.036      | 0.645       | 0.051       | 0.169       | -0.113       | -0.024       | -0.075       | 0.017        | 0.136        | -0.034       | 0.003        | 0.047        | 0.023        | -0.112       |
| MEAN Nucleus EosinODMean         | 0.015       | 0.104       | -0.01       | 0.001       | 0.281       | 0.836       | -0.116      | 0.07        | 0.012       | -0.025       | 0.001        | 0.052        | 0.018        | -0.043       | 0.014        | -0.017       | 0.031        | 0.01         | 0.07         |
| MEAN Nucleus EosinODSum          | 0.102       | -0.025      | -0.011      | 0.011       | 0.272       | 0.771       | -0.083      | 0.093       | -0.32       | -0.032       | -0.01        | 0.026        | -0.009       | -0.052       | 0.002        | -0.026       | 0.035        | -0.016       | 0.043        |
| MEAN Nucleus EosinODStdDev       | -0.182      | 0.071       | -0.087      | -0.11       | 0.728       | 0.108       | 0.09        | 0.051       | 0.354       | 0.091        | 0.046        | 0.021        | -0.072       | 0.059        | 0.098        | -0.013       | 0.142        | -0.037       | -0.067       |
| MEAN Nucleus EosinODMin          | 0.079       | 0.084       | 0.039       | 0.041       | -0.036      | 0.866       | -0.155      | 0.05        | -0.092      | -0.044       | -0.038       | 0.048        | 0.052        | -0.049       | -0.034       | -0.015       | -0.034       | 0.005        | 0.093        |
| MEAN Nucleus EosinODRange        | -0.103      | 0.072       | -0.095      | -0.051      | 0.762       | 0.184       | 0.163       | 0.074       | 0.257       | 0.037        | 0.063        | 0.011        | -0.08        | 0.091        | 0.085        | -0.01        | 0.16         | 0.025        | -0.095       |
| MEAN Cell Perimeter              | -0.319      | -0.378      | -0.079      | -0.684      | 0.001       | -0.034      | -0.058      | 0.011       | -0.299      | -0.017       | -0.062       | -0.045       | -0.063       | 0.039        | -0.013       | 0.051        | 0.032        | -0.012       | -0.03        |
| MEAN Cell Circularity            | -0.489      | -0.351      | -0.101      | -0.507      | -0.084      | -0.125      | -0.004      | -0.047      | 0.292       | 0.214        | 0.007        | -0.069       | -0.002       | -0.181       | -0.016       | -0.03        | 0.033        | 0.019        | -0.001       |
| MEAN Cell MaxCaliper             | -0.229      | -0.34       | -0.051      | -0.669      | 0.022       | -0.01       | -0.076      | 0.026       | -0.401      | -0.09        | -0.092       | -0.03        | -0.072       | 0.098        | -0.009       | 0.08         | 0.019        | -0.007       | -0.033       |
| MEAN Cell Eccentricity           | 0.48        | 0.366       | 0.086       | 0.355       | 0.12        | 0.108       | -0.028      | 0.037       | -0.288      | -0.389       | -0.07        | 0.062        | -0.02        | 0.216        | 0.013        | 0.045        | -0.06        | 0.012        | 0.003        |
| MEAN Cell HematoxylinODMean      | 0.42        | 0.169       | 0.202       | 0.201       | 0.195       | 0.021       | 0.663       | 0.049       | -0.099      | 0.04         | 0.059        | -0.019       | 0.043        | -0.078       | -0.014       | 0.018        | -0.02        | 0.052        | 0.109        |
| MEAN Cell HematoxylinODStdDev    | 0.268       | 0.058       | 0.106       | 0.075       | 0.503       | 0.102       | 0.662       | 0.032       | 0.082       | -0.064       | -0.023       | -0.018       | -0.025       | 0.017        | 0.018        | 0.004        | 0.007        | -0.04        | -0.095       |
| MEAN Cell HematoxylinODMax       | 0.244       | 0.034       | 0.092       | 0.002       | 0.457       | -0.017      | 0.721       | 0.043       | 0.119       | -0.068       | -0.007       | -0.062       | 0.008        | 0.038        | -0.008       | 0.013        | 0.016        | -0.002       | -0.053       |

| <i>Pathomic feature name</i>           | <i>P_F1</i> | <i>P_F2</i> | <i>P_F3</i> | <i>P_F4</i> | <i>P_F5</i> | <i>P_F6</i> | <i>P_F7</i> | <i>P_F8</i> | <i>P_F9</i> | <i>P_F10</i> | <i>P_F11</i> | <i>P_F12</i> | <i>P_F13</i> | <i>P_F14</i> | <i>P_F15</i> | <i>P_F16</i> | <i>P_F17</i> | <i>P_F18</i> | <i>P_F19</i> |
|----------------------------------------|-------------|-------------|-------------|-------------|-------------|-------------|-------------|-------------|-------------|--------------|--------------|--------------|--------------|--------------|--------------|--------------|--------------|--------------|--------------|
| MEAN Cell EosinODMean                  | 0.147       | 0.113       | 0.05        | 0.035       | 0.113       | 0.878       | 0.023       | 0.055       | -0.046      | -0.045       | 0.003        | 0.044        | 0.003        | 0.015        | 0.039        | 0.01         | -0.009       | -0.001       | -0.008       |
| MEAN Cell EosinODStdDev                | -0.172      | 0.15        | -0.13       | 0.005       | 0.679       | 0.381       | -0.151      | -0.005      | 0.103       | 0.053        | 0.157        | 0.026        | -0.057       | 0.231        | 0.083        | 0.016        | 0.047        | -0.034       | -0.033       |
| MEAN Cell EosinODMax                   | 0.003       | 0.097       | -0.021      | 0.009       | 0.394       | 0.793       | 0.016       | 0.052       | 0.08        | -0.003       | 0.038        | 0.036        | -0.029       | 0.098        | 0.047        | 0.002        | 0.062        | 0.006        | -0.072       |
| MEAN Cell EosinODMin                   | 0.213       | 0.085       | 0.11        | 0.03        | -0.148      | 0.83        | 0.007       | 0.099       | -0.068      | -0.008       | -0.077       | 0.054        | 0.076        | -0.084       | -0.067       | -0.028       | -0.022       | -0.028       | 0.012        |
| MEAN Cytoplasm HematoxylinODMean       | 0.393       | 0.202       | 0.2         | 0.156       | 0.027       | -0.032      | 0.613       | 0.037       | -0.118      | 0.078        | 0.11         | -0.049       | 0.069        | -0.076       | -0.02        | 0.021        | -0.022       | 0.084        | 0.186        |
| MEAN Cytoplasm HematoxylinODStdDev     | 0.275       | 0.145       | 0.104       | 0.274       | 0.395       | 0.361       | 0.514       | 0.019       | -0.035      | -0.006       | 0.059        | -0.01        | 0.034        | 0.236        | 0.029        | -0.027       | -0.029       | 0.04         | -0.071       |
| MEAN Cytoplasm HematoxylinODMax        | 0.292       | 0.125       | 0.13        | 0.127       | 0.397       | 0.052       | 0.714       | 0.032       | -0.004      | -0.032       | 0.047        | -0.052       | 0.032        | 0.086        | -0.06        | -0.014       | 0.017        | 0.036        | -0.01        |
| MEAN Cytoplasm HematoxylinODMin        | 0.144       | 0.097       | 0.144       | -0.067      | -0.161      | -0.642      | 0.31        | -0.024      | -0.064      | 0.056        | -0.029       | -0.037       | 0.062        | -0.311       | -0.117       | 0.012        | -0.016       | -0.023       | 0.239        |
| MEAN Cytoplasm EosinODMean             | 0.154       | 0.105       | 0.07        | 0.017       | 0.069       | 0.879       | 0.061       | 0.051       | -0.04       | -0.046       | 0.004        | 0.043        | 0.003        | 0.032        | 0.045        | 0.018        | -0.022       | -0.001       | -0.026       |
| MEAN Cytoplasm EosinODStdDev           | -0.073      | 0.191       | -0.096      | -0.003      | 0.536       | 0.522       | -0.029      | -0.026      | 0.022       | 0.028        | 0.193        | 0.021        | -0.046       | 0.324        | 0.119        | 0.057        | -0.043       | -0.025       | -0.035       |
| MEAN Cytoplasm EosinODMax              | 0.05        | 0.121       | 0.006       | 0.002       | 0.302       | 0.827       | 0.033       | 0.039       | 0.029       | -0.01        | 0.054        | 0.04         | -0.027       | 0.13         | 0.067        | 0.027        | 0.011        | -0.005       | -0.061       |
| MEAN Cytoplasm EosinODMin              | 0.228       | 0.092       | 0.131       | 0.018       | -0.122      | 0.821       | 0.078       | 0.104       | -0.047      | -0.016       | -0.092       | 0.047        | 0.067        | -0.081       | -0.055       | -0.029       | -0.016       | -0.039       | -0.016       |
| MEAN Nucleus CellAreaRatio             | 0.425       | 0.18        | 0.095       | 0.608       | -0.039      | 0.111       | -0.01       | 0.064       | -0.451      | -0.054       | -0.004       | 0.062        | 0.056        | -0.036       | 0.015        | -0.016       | -0.028       | 0.03         | 0.015        |
| MEAN Delaunay MinDistance              | -0.363      | -0.442      | 0.056       | -0.345      | -0.15       | -0.103      | -0.054      | -0.011      | 0.125       | 0.555        | 0.012        | -0.058       | 0.029        | -0.064       | -0.072       | 0.036        | 0.019        | -0.003       | -0.028       |
| MEAN Delaunay MeanTriangleArea         | -0.321      | -0.396      | 0.093       | -0.236      | -0.172      | -0.097      | -0.065      | -0.011      | 0.176       | 0.632        | 0.014        | -0.054       | 0.032        | -0.065       | -0.101       | 0.044        | 0.015        | -0.028       | -0.021       |
| MEAN Delaunay MaxTriangleArea          | -0.306      | -0.388      | 0.117       | -0.247      | -0.172      | -0.097      | -0.054      | 0.001       | 0.167       | 0.633        | 0.011        | -0.074       | 0.03         | -0.06        | -0.102       | 0.056        | 0.025        | -0.023       | -0.017       |
| MEAN DM Std dev                        | 0.036       | 0.054       | -0.059      | 0.086       | 0.841       | 0.103       | 0.267       | 0.03        | -0.056      | 0.006        | 0.014        | -0.058       | -0.016       | 0.013        | -0.016       | -0.048       | 0.028        | -0.054       | 0.061        |
| MEAN DM Min                            | 0.297       | 0.128       | 0.164       | 0.087       | -0.104      | 0.787       | 0.195       | 0.077       | -0.046      | -0.027       | -0.003       | 0.051        | 0.02         | -0.086       | 0.018        | 0.021        | 0            | 0.042        | 0.024        |
| MEAN DM Max                            | 0.2         | 0.09        | 0.076       | 0.049       | 0.447       | 0.67        | 0.329       | 0.078       | -0.047      | -0.024       | 0.005        | -0.004       | -0.002       | -0.069       | 0.022        | -0.007       | 0.031        | 0.021        | 0.047        |
| MEAN DM HaralickAngularSecondMoment F0 | 0.063       | 0.07        | 0.105       | 0.147       | -0.686      | -0.092      | -0.061      | -0.014      | 0.268       | 0.262        | 0.302        | -0.06        | -0.066       | -0.003       | 0.026        | -0.007       | 0.213        | -0.07        | 0.031        |
| MEAN DM HaralickContrast F1            | 0.042       | 0.121       | -0.039      | 0.147       | 0.78        | -0.006      | 0.329       | 0.049       | 0.078       | 0.056        | 0.004        | -0.026       | -0.07        | -0.012       | 0.036        | -0.049       | 0.121        | 0.02         | -0.002       |
| MEAN DM HaralickCorrelation F2         | -0.243      | -0.231      | -0.16       | -0.521      | 0.262       | -0.003      | -0.02       | 0.014       | -0.466      | -0.086       | -0.077       | -0.015       | -0.02        | -0.014       | -0.091       | -0.02        | -0.139       | -0.209       | 0.03         |
| MEAN DM HaralickSumOfSquares F3        | 0.006       | 0.068       | -0.071      | 0.018       | 0.804       | 0.029       | 0.323       | 0.046       | -0.029      | 0.045        | 0.043        | -0.065       | -0.08        | -0.004       | 0.003        | -0.06        | 0.087        | -0.045       | 0.031        |
| MEAN DM HaralickInverseDifferenceMomen | -0.147      | -0.119      | 0.008       | -0.297      | -0.774      | -0.181      | -0.182      | -0.005      | 0.042       | 0.085        | 0.091        | -0.01        | -0.089       | -0.012       | 0.015        | 0.019        | 0.088        | -0.016       | -0.059       |
| MEAN DM HaralickSumAverage F5          | 0.284       | 0.148       | 0.119       | 0.107       | 0.159       | 0.768       | 0.263       | 0.064       | -0.091      | -0.028       | 0.016        | 0.028        | 0.025        | -0.034       | 0.03         | 0.015        | -0.016       | 0.021        | 0.04         |
| MEAN DM HaralickSumEntropy F7          | -0.125      | -0.192      | -0.122      | -0.324      | 0.679       | 0.137       | 0.133       | 0.021       | -0.28       | -0.178       | -0.133       | -0.045       | -0.006       | -0.06        | 0.082        | -0.002       | -0.111       | -0.03        | 0.032        |
| MEAN DM HaralickEntropy F8             | -0.16       | -0.177      | -0.122      | -0.315      | 0.689       | 0.135       | 0.114       | 0.015       | -0.261      | -0.213       | -0.148       | -0.029       | 0.028        | -0.004       | 0.015        | 0.005        | -0.11        | 0.028        | 0.014        |
| MEAN DM HaralickDifferenceVariance F9  | 0.09        | 0.158       | 0.052       | 0.051       | -0.837      | -0.106      | -0.11       | -0.023      | -0.023      | 0.043        | 0.163        | 0.012        | -0.054       | 0.096        | 0.043        | 0.017        | 0.075        | -0.021       | -0.021       |
| MEAN DM HaralickInformationMeasureOfCo | -0.241      | -0.212      | -0.018      | -0.44       | -0.662      | -0.151      | -0.176      | 0           | 0.052       | 0.036        | 0.044        | -0.006       | -0.092       | -0.036       | 0.041        | 0.03         | 0.08         | 0.034        | -0.084       |
| MEAN DM HaralickInformationMeasureOf I | 0.094       | 0.045       | -0.028      | 0.22        | 0.737       | 0.119       | 0.068       | -0.002      | -0.178      | -0.134       | -0.265       | 0.041        | 0.117        | -0.014       | -0.072       | -0.022       | -0.211       | 0.034        | 0.017        |
| CD50um firstorder 10Percentile         | 0.306       | 0.195       | -0.367      | 0.744       | -0.014      | 0.017       | 0.029       | 0.053       | 0.009       | -0.027       | -0.011       | 0.004        | 0.034        | 0.004        | -0.003       | 0.013        | 0.007        | 0.037        | 0.038        |
| CD50um firstorder 90Percentile         | 0.481       | 0.441       | 0.057       | 0.594       | -0.033      | 0.075       | 0.064       | 0.012       | 0.041       | -0.072       | 0.129        | 0.098        | 0.038        | 0.038        | 0.047        | -0.027       | 0.01         | 0.038        | 0.027        |
| CD50um firstorder Entropy              | 0.606       | 0.535       | -0.013      | 0.156       | 0.005       | 0.113       | 0.065       | -0.013      | -0.028      | -0.239       | 0.158        | 0.19         | 0.004        | 0.085        | 0.07         | -0.041       | 0.016        | 0.052        | 0.024        |

| <i>Pathomic feature name</i>         | <i>P_F1</i> | <i>P_F2</i> | <i>P_F3</i> | <i>P_F4</i> | <i>P_F5</i> | <i>P_F6</i> | <i>P_F7</i> | <i>P_F8</i> | <i>P_F9</i> | <i>P_F10</i> | <i>P_F11</i> | <i>P_F12</i> | <i>P_F13</i> | <i>P_F14</i> | <i>P_F15</i> | <i>P_F16</i> | <i>P_F17</i> | <i>P_F18</i> | <i>P_F19</i> |
|--------------------------------------|-------------|-------------|-------------|-------------|-------------|-------------|-------------|-------------|-------------|--------------|--------------|--------------|--------------|--------------|--------------|--------------|--------------|--------------|--------------|
| CD50um firstorder InterquartileRange | 0.498       | 0.562       | 0.163       | 0.084       | -0.053      | 0.112       | -0.002      | -0.074      | 0.081       | -0.068       | 0.198        | 0.302        | 0.014        | 0.052        | 0.045        | -0.021       | 0.025        | 0.101        | 0.018        |
| CD50um firstorder Kurtosis           | -0.202      | -0.326      | 0.015       | -0.351      | -0.165      | -0.162      | 0.053       | -0.017      | 0.17        | 0.359        | -0.08        | -0.5         | 0.109        | 0.041        | -0.216       | 0            | -0.042       | 0.039        | 0.015        |
| CD50um firstorder Maximum            | 0.681       | 0.327       | 0.015       | 0.384       | -0.038      | 0.059       | 0.073       | 0.125       | 0.001       | -0.09        | 0.171        | 0.02         | 0.044        | 0.01         | 0.037        | 0.095        | -0.017       | 0.111        | 0.042        |
| CD50um firstorder Minimum            | -0.065      | -0.003      | -0.128      | 0.743       | 0.046       | -0.026      | -0.027      | -0.22       | -0.172      | 0.009        | 0.081        | -0.1         | -0.191       | 0.013        | 0.057        | 0.068        | 0.049        | 0.18         | -0.111       |
| CD50um firstorder Range              | 0.726       | 0.338       | 0.064       | 0.111       | -0.057      | 0.071       | 0.086       | 0.213       | 0.067       | -0.096       | 0.144        | 0.06         | 0.119        | 0.006        | 0.017        | 0.07         | -0.036       | 0.043        | 0.086        |
| CD50um firstorder RMAD               | 0.387       | 0.471       | 0.576       | 0.07        | 0.002       | 0.102       | 0.051       | -0.052      | 0.06        | -0.106       | 0.207        | 0.19         | 0.015        | 0.023        | 0.054        | -0.051       | 0.001        | 0.028        | -0.009       |
| CD50um firstorder Skewness           | -0.259      | -0.235      | -0.301      | -0.572      | -0.153      | -0.087      | -0.09       | -0.139      | 0.056       | 0.171        | 0.257        | -0.234       | -0.113       | 0.027        | -0.077       | 0.042        | 0.015        | 0.204        | -0.005       |
| CD50um firstorder Uniformity         | -0.494      | -0.488      | 0.093       | -0.156      | -0.099      | -0.111      | -0.065      | 0.008       | 0.145       | 0.47         | -0.058       | -0.157       | 0.041        | -0.078       | -0.091       | 0.04         | -0.004       | -0.042       | -0.008       |
| CD50um glcm JointAverage             | 0.558       | 0.432       | 0.076       | 0.404       | -0.03       | 0.081       | 0.105       | 0.184       | 0.129       | -0.069       | -0.025       | 0.145        | 0.175        | 0.007        | -0.008       | -0.061       | -0.049       | -0.088       | 0.087        |
| CD50um glcm ClusterProminence        | 0.154       | 0.258       | 0.815       | -0.016      | -0.065      | 0.086       | 0.07        | -0.028      | 0.099       | -0.06        | 0.184        | -0.037       | 0.02         | 0.011        | 0.056        | -0.04        | 0.027        | -0.037       | 0.042        |
| CD50um glcm ClusterShade             | -0.001      | -0.069      | -0.787      | -0.169      | -0.179      | -0.036      | -0.026      | -0.041      | 0.082       | 0.021        | 0.287        | -0.022       | -0.088       | 0.034        | 0.074        | 0.045        | 0.136        | 0.088        | 0.054        |
| CD50um glcm ClusterTendency          | 0.338       | 0.381       | 0.631       | -0.021      | -0.088      | 0.09        | 0.068       | -0.051      | 0.134       | -0.043       | 0.316        | 0.096        | 0.028        | 0.037        | 0.084        | -0.056       | 0.034        | 0.031        | 0.056        |
| CD50um glcm Contrast                 | 0.205       | 0.771       | 0.029       | 0.223       | -0.016      | 0.212       | -0.002      | 0.01        | 0.078       | -0.047       | 0.013        | -0.062       | 0.041        | 0.039        | -0.04        | 0.078        | 0.128        | -0.135       | 0.107        |
| CD50um glcm Correlation              | 0.603       | 0.156       | 0.342       | -0.187      | -0.137      | -0.044      | 0.115       | -0.076      | 0.086       | 0.089        | 0.341        | 0.222        | -0.01        | 0.091        | -0.009       | -0.143       | -0.081       | 0.137        | -0.037       |
| CD50um glcm DifferenceAverage        | 0.247       | 0.744       | -0.113      | 0.261       | 0.022       | 0.197       | -0.015      | 0.027       | -0.014      | -0.167       | 0.016        | -0.033       | 0.011        | 0.068        | -0.016       | 0.074        | 0.109        | -0.138       | 0.058        |
| CD50um glcm DifferenceVariance       | 0.205       | 0.748       | 0.235       | 0.175       | -0.03       | 0.198       | 0.017       | -0.014      | 0.127       | -0.049       | 0.037        | -0.089       | 0.042        | 0.05         | -0.039       | 0.059        | 0.128        | -0.096       | 0.135        |
| CD50um glcm JointEnergy              | -0.457      | -0.338      | 0.521       | -0.103      | -0.072      | -0.071      | -0.036      | -0.001      | 0.124       | 0.415        | -0.04        | -0.094       | 0.047        | -0.097       | -0.044       | 0.001        | -0.047       | -0.025       | -0.016       |
| CD50um glcm JointEntropy             | 0.715       | 0.415       | -0.1        | 0.179       | 0.008       | 0.131       | 0.054       | 0.015       | -0.02       | -0.197       | 0.102        | 0.133        | 0.016        | 0.083        | 0.046        | 0.001        | 0.064        | 0.033        | 0.032        |
| CD50um glcm Imc2                     | -0.119      | 0.55        | 0.214       | -0.217      | -0.182      | -0.012      | 0.075       | -0.192      | 0.146       | -0.004       | 0.317        | 0.295        | 0.044        | 0.115        | 0.035        | -0.188       | -0.135       | 0.205        | -0.046       |
| CD50um glcm Idm                      | -0.284      | -0.538      | 0.416       | -0.242      | -0.044      | -0.127      | 0.006       | -0.039      | 0.153       | 0.386        | 0.012        | -0.014       | 0.038        | -0.066       | -0.041       | -0.046       | -0.08        | 0.098        | 0.039        |
| CD50um glcm Idmn                     | 0.808       | -0.127      | 0.061       | -0.108      | -0.116      | -0.118      | 0.096       | 0.119       | 0.061       | 0.092        | 0.081        | -0.015       | -0.005       | -0.028       | -0.157       | 0.034        | -0.108       | -0.02        | -0.009       |
| CD50um glcm Idn                      | 0.765       | -0.167      | 0.168       | -0.121      | -0.111      | -0.103      | 0.109       | 0.154       | 0.103       | 0.099        | 0.117        | 0.014        | 0.052        | -0.036       | -0.096       | 0.029        | -0.117       | 0.066        | 0.039        |
| CD50um glcm InverseVariance          | -0.286      | -0.649      | -0.085      | -0.299      | -0.013      | -0.198      | 0.047       | -0.059      | 0.151       | 0.271        | -0.031       | 0.014        | 0.062        | -0.07        | -0.015       | -0.052       | -0.016       | 0.181        | 0.013        |
| CD50um glcm MaximumProbability       | -0.262      | -0.15       | 0.759       | -0.073      | -0.09       | -0.044      | -0.019      | -0.021      | 0.078       | 0.321        | -0.005       | -0.098       | 0.02         | -0.069       | -0.086       | -0.02        | -0.063       | -0.066       | -0.038       |
| CD50um glcm SumEntropy               | 0.658       | 0.488       | 0.007       | 0.056       | -0.055      | 0.075       | 0.057       | -0.027      | 0.03        | -0.118       | 0.244        | 0.217        | 0.004        | 0.114        | 0.03         | -0.058       | 0.003        | 0.069        | 0.017        |
| CD50um glcm SumSquares               | 0.341       | 0.455       | 0.591       | 0.009       | -0.084      | 0.112       | 0.063       | -0.047      | 0.135       | -0.046       | 0.296        | 0.081        | 0.031        | 0.039        | 0.073        | -0.042       | 0.048        | 0.011        | 0.067        |
| CD50um glrlm RLNU                    | 0.182       | 0.654       | -0.258      | 0.197       | -0.031      | 0.107       | 0.02        | -0.031      | -0.078      | -0.289       | -0.025       | -0.075       | -0.068       | 0.035        | -0.006       | 0.031        | 0.158        | -0.076       | -0.175       |
| CD50um glrlm RunPercentage           | 0.072       | 0.36        | -0.775      | 0.097       | -0.023      | 0.027       | -0.023      | -0.008      | -0.051      | -0.196       | 0.016        | -0.003       | -0.008       | 0.041        | 0.016        | 0.04         | 0.11         | -0.024       | -0.07        |
| CD50um glrlm RunVariance             | 0.022       | 0.044       | 0.902       | 0.02        | 0.037       | 0.045       | 0.037       | -0.009      | -0.008      | -0.027       | -0.035       | -0.048       | -0.021       | -0.029       | -0.023       | -0.035       | -0.057       | -0.035       | -0.027       |
| CD50um glszm GLNU                    | -0.501      | -0.491      | 0.052       | -0.156      | -0.097      | -0.111      | -0.066      | 0.009       | 0.145       | 0.47         | -0.06        | -0.148       | 0.04         | -0.078       | -0.083       | 0.044        | -0.006       | -0.039       | -0.005       |

| <i>Pathomic feature name</i>          | <i>P_F1</i> | <i>P_F2</i> | <i>P_F3</i> | <i>P_F4</i> | <i>P_F5</i> | <i>P_F6</i> | <i>P_F7</i> | <i>P_F8</i> | <i>P_F9</i> | <i>P_F10</i> | <i>P_F11</i> | <i>P_F12</i> | <i>P_F13</i> | <i>P_F14</i> | <i>P_F15</i> | <i>P_F16</i> | <i>P_F17</i> | <i>P_F18</i> | <i>P_F19</i> |
|---------------------------------------|-------------|-------------|-------------|-------------|-------------|-------------|-------------|-------------|-------------|--------------|--------------|--------------|--------------|--------------|--------------|--------------|--------------|--------------|--------------|
| CD50um glszm SALGLE                   | -0.599      | -0.384      | 0.068       | -0.167      | -0.102      | -0.03       | -0.069      | -0.038      | 0.122       | 0.471        | 0.006        | -0.016       | 0.074        | -0.054       | 0.064        | 0.05         | 0.074        | 0.113        | 0.044        |
| CD50um gldm DependenceEntropy         | 0.701       | 0.386       | 0.022       | 0.135       | 0.012       | 0.104       | 0.078       | 0.002       | -0.007      | -0.185       | 0.169        | 0.231        | 0.014        | 0.08         | 0.092        | -0.044       | -0.004       | 0.093        | 0.075        |
| CD50um gldm DependenceVariance        | -0.01       | -0.225      | 0.858       | -0.052      | 0.02        | 0.003       | 0.038       | 0.00E+00    | 0.033       | 0.13         | -0.028       | -0.023       | -0.022       | -0.033       | -0.02        | -0.041       | -0.077       | 0.007        | 0.022        |
| CD50um gldm LDLGLE                    | -0.073      | 0.029       | 0.902       | 0.003       | 0.02        | 0.042       | 0.02        | -0.01       | 0           | 0.036        | -0.026       | -0.05        | -0.003       | -0.037       | -0.015       | -0.027       | -0.051       | -0.032       | -0.03        |
| CD50um gldm LowGrayLevelEmphasis      | -0.374      | -0.171      | 0.751       | -0.087      | -0.038      | 0.017       | -0.022      | -0.027      | 0.058       | 0.277        | -0.013       | -0.046       | 0.038        | -0.057       | 0.021        | 0.003        | -0.007       | 0.031        | -0.003       |
| CD50um ngtdm Busyness                 | 0.284       | -0.337      | -0.053      | -0.008      | 0.032       | 0.144       | 0.038       | 0.751       | -0.13       | 0.043        | -0.045       | 0.012        | 0.027        | -0.014       | 0.005        | 0.02         | 0.035        | 0.015        | 0.007        |
| CD50um ngtdm Complexity               | 0.607       | 0.437       | 0.065       | 0.152       | -0.054      | 0.195       | 0.112       | 0.258       | 0.124       | 0.021        | 0.074        | 0.021        | 0.178        | -0.003       | 0.046        | 0.036        | 0.035        | 0.032        | 0.137        |
| CD50um ngtdm Contrast                 | -0.262      | 0.642       | 0.413       | 0.113       | 0.024       | 0.13        | -0.023      | -0.177      | 0.019       | -0.144       | 0.165        | 0.156        | -0.066       | 0.05         | 0.113        | -0.049       | 0.062        | 0.001        | 0.011        |
| CD50um ngtdm Strength                 | -0.374      | 0.602       | -0.028      | -0.208      | -0.127      | -0.081      | -0.017      | -0.131      | 0.14        | 0.022        | 0.381        | -0.071       | -0.074       | 0.112        | -0.138       | -0.043       | -0.061       | -0.122       | 0.033        |
| CD100um firstorder 10Percentile       | 0.373       | 0.071       | -0.362      | 0.741       | 0.023       | 0.013       | 0.021       | 0.064       | -0.005      | -0.045       | 0.001        | -0.003       | 0.024        | -0.009       | 0.021        | 0.008        | -0.038       | 0.01         | 0.009        |
| CD100um firstorder Entropy            | 0.672       | 0.458       | 0.036       | 0.184       | 0.042       | 0.102       | 0.093       | -0.023      | -0.022      | -0.136       | 0.102        | 0.23         | 0.033        | 0.081        | 0.082        | -0.049       | -0.013       | 0.115        | -0.002       |
| CD100um firstorder InterquartileRange | 0.366       | 0.571       | 0.149       | 0.034       | -0.041      | 0.04        | 0.013       | -0.084      | 0.072       | 0.001        | 0.267        | 0.43         | 0.08         | -0.03        | 0.049        | -0.073       | -0.063       | 0.144        | 0.015        |
| CD100um firstorder Kurtosis           | 0.005       | -0.329      | 0.022       | -0.148      | -0.024      | -0.143      | 0.115       | 0.012       | 0.089       | 0.221        | 0.003        | -0.736       | 0.06         | 0.055        | -0.1         | -0.063       | 0.045        | 0.074        | -0.071       |
| CD100um firstorder Maximum            | 0.652       | 0.31        | 0.053       | 0.424       | -0.046      | 0.088       | 0.166       | 0.099       | -0.009      | -0.063       | 0.161        | -0.064       | 0.001        | 0.072        | 0.055        | -0.037       | -0.028       | 0.138        | 0.003        |
| CD100um firstorder Minimum            | -0.039      | -0.018      | -0.261      | 0.618       | -0.017      | -0.091      | 0.104       | -0.149      | -0.017      | -0.2         | 0.072        | -0.015       | -0.467       | -0.011       | -0.088       | 0.087        | -0.019       | 0.044        | -0.047       |
| CD100um firstorder Range              | 0.691       | 0.328       | 0.181       | 0.136       | -0.039      | 0.135       | 0.12        | 0.174       | -0.001      | 0.033        | 0.131        | -0.059       | 0.231        | 0.081        | 0.101        | -0.081       | -0.018       | 0.119        | 0.026        |
| CD100um firstorder RMAD               | 0.286       | 0.504       | 0.582       | 0.034       | -0.047      | 0.062       | 0.055       | -0.058      | 0.015       | -0.027       | 0.191        | 0.29         | 0.023        | -0.023       | 0.049        | -0.065       | -0.018       | 0.086        | -0.005       |
| CD100um firstorder Skewness           | -0.134      | -0.145      | -0.252      | -0.65       | -0.148      | -0.105      | -0.006      | -0.118      | 0.087       | 0.177        | 0.282        | -0.231       | -0.166       | 0.003        | -0.09        | -0.042       | -0.003       | 0.159        | -0.028       |
| CD100um firstorder Uniformity         | -0.578      | -0.457      | 0.079       | -0.154      | -0.114      | -0.095      | -0.079      | 0.024       | 0.116       | 0.388        | -0.031       | -0.194       | 0.023        | -0.099       | -0.072       | 0.041        | 0.028        | -0.072       | 0.005        |
| CD100um glcm ClusterProminence        | 0.124       | 0.207       | 0.834       | -0.01       | -0.075      | 0.078       | 0.064       | -0.023      | 0.076       | -0.075       | 0.196        | -0.042       | -0.01        | 0.005        | 0.057        | -0.039       | 0.038        | -0.036       | 0.024        |
| CD100um glcm ClusterShade             | 0.008       | -0.035      | -0.783      | -0.149      | -0.189      | -0.023      | -0.01       | -0.03       | 0.115       | 0.034        | 0.302        | -0.008       | -0.068       | 0.023        | 0.088        | 0.033        | 0.151        | 0.057        | 0.073        |
| CD100um glcm ClusterTendency          | 0.308       | 0.365       | 0.65        | -0.02       | -0.099      | 0.08        | 0.07        | -0.046      | 0.106       | -0.017       | 0.329        | 0.137        | 0.021        | 0.02         | 0.083        | -0.06        | 0.027        | 0.05         | 0.034        |
| CD100um glcm Contrast                 | 0.048       | 0.818       | 0.243       | 0.094       | 0.062       | 0.084       | 0.065       | -0.06       | 0.161       | 0.114        | 0.017        | -0.013       | 0.05         | 0.038        | -0.017       | 0.014        | 0.074        | -0.024       | 0.111        |
| CD100um glcm Correlation              | 0.63        | -0.146      | 0.236       | -0.117      | -0.212      | -0.04       | 0.042       | 0.028       | -0.056      | 0.179        | 0.343        | 0.247        | -0.058       | 0.03         | -0.082       | -0.108       | -0.082       | 0.009        | -0.111       |
| CD100um glcm DifferenceAverage        | 0.03        | 0.866       | 0.081       | 0.116       | 0.104       | 0.074       | 0.047       | -0.057      | 0.091       | -0.014       | -0.007       | 0.036        | 0.051        | 0.076        | 0.06         | 0.018        | 0.029        | -0.011       | 0.084        |
| CD100um glcm DifferenceEntropy        | 0.328       | 0.786       | 0.076       | 0.128       | 0.1         | 0.078       | 0.059       | -0.077      | 0.009       | -0.171       | -0.031       | -0.012       | 0.028        | 0.124        | 0.019        | 0.009        | 0.035        | 0.012        | 0.024        |
| CD100um glcm DifferenceVariance       | 0.098       | 0.744       | 0.392       | 0.096       | 0.02        | 0.092       | 0.079       | -0.076      | 0.172       | 0.102        | 0.064        | -0.058       | 0.049        | 0.03         | -0.048       | -0.003       | 0.104        | -0.002       | 0.101        |
| CD100um glcm JointEnergy              | -0.752      | -0.183      | 0.333       | -0.103      | -0.096      | -0.067      | -0.059      | 0.02        | 0.06        | 0.267        | 0.032        | 0.002        | 0.088        | -0.038       | 0.018        | 0.017        | 0.025        | 0.05         | 0.039        |
| CD100um glcm JointEntropy             | 0.852       | 0.021       | 0.01        | 0.167       | 0.061       | 0.098       | 0.061       | 0.078       | -0.061      | -0.117       | -0.049       | 0.111        | 0.074        | 0.033        | 0.101        | 0.012        | 0.01         | 0.07         | 0.016        |
| CD100um glcm Imc1                     | 0.537       | -0.58       | -0.043      | 0.081       | 0.097       | 0.02        | -0.007      | 0.153       | -0.102      | -0.051       | -0.278       | -0.19        | 0.043        | -0.06        | 0.025        | 0.1          | 0.035        | -0.085       | 0.022        |
| CD100um glcm Imc2                     | -0.271      | 0.48        | 0.109       | -0.071      | -0.2        | 0.023       | 0.04        | -0.419      | 0.165       | 0.008        | 0.179        | 0.285        | 0.045        | 0.141        | -0.011       | -0.151       | -0.077       | 0.225        | -0.085       |
| CD100um glcm Idm                      | -0.041      | -0.625      | 0.28        | -0.166      | -0.173      | -0.123      | -0.008      | 0.016       | 0.079       | 0.331        | 0.002        | -0.101       | -0.031       | -0.032       | -0.377       | -0.004       | 0.09         | -0.002       | -0.069       |
| CD100um glcm Idmn                     | 0.776       | -0.242      | 0.013       | -0.019      | -0.113      | -0.011      | 0.055       | 0.051       | -0.099      | 0.189        | 0.085        | -0.161       | -0.007       | -0.004       | -0.167       | -0.028       | -0.024       | -0.097       | -0.155       |

| <i>Pathomic feature name</i>             | <i>P_F1</i> | <i>P_F2</i> | <i>P_F3</i> | <i>P_F4</i> | <i>P_F5</i> | <i>P_F6</i> | <i>P_F7</i> | <i>P_F8</i> | <i>P_F9</i> | <i>P_F10</i> | <i>P_F11</i> | <i>P_F12</i> | <i>P_F13</i> | <i>P_F14</i> | <i>P_F15</i> | <i>P_F16</i> | <i>P_F17</i> | <i>P_F18</i> | <i>P_F19</i> |
|------------------------------------------|-------------|-------------|-------------|-------------|-------------|-------------|-------------|-------------|-------------|--------------|--------------|--------------|--------------|--------------|--------------|--------------|--------------|--------------|--------------|
| CD100um glcm Idn                         | 0.763       | -0.274      | 0.089       | 0.004       | -0.127      | 0.011       | 0.073       | 0.103       | -0.077      | 0.191        | 0.128        | -0.156       | 0.052        | 0.003        | -0.135       | -0.056       | 0.003        | -0.005       | -0.112       |
| CD100um glcm InverseVariance             | -0.182      | -0.714      | 0.013       | -0.076      | -0.126      | -0.063      | -0.026      | 0.055       | 0.051       | 0.415        | 0.036        | -0.113       | 0.012        | -0.16        | -0.01        | -0.05        | 0.036        | -0.02        | -0.114       |
| CD100um glcm MaximumProbability          | -0.418      | -0.046      | 0.736       | -0.135      | -0.152      | -0.05       | -0.004      | -0.028      | -0.055      | 0.135        | -0.006       | -0.004       | 0.033        | 0.079        | -0.056       | 0.065        | 0.135        | 0.00E+00     | 0.009        |
| CD100um glcm SumEntropy                  | 0.758       | 0.317       | 0.08        | 0.116       | -0.057      | 0.095       | 0.068       | -0.006      | -0.006      | -0.071       | 0.172        | 0.251        | 0.06         | 0.067        | 0.026        | -0.06        | -0.037       | 0.079        | -0.028       |
| CD100um glcm SumSquares                  | 0.284       | 0.457       | 0.622       | -0.003      | -0.079      | 0.085       | 0.073       | -0.051      | 0.12        | 0.003        | 0.298        | 0.121        | 0.027        | 0.024        | 0.072        | -0.052       | 0.036        | 0.041        | 0.049        |
| CD100um glrlm LongRunEmphasis            | 0.119       | -0.184      | 0.668       | -0.179      | -0.13       | -0.087      | 0.074       | -0.004      | -0.154      | 0.036        | -0.114       | 0.029        | -0.019       | 0.226        | -0.287       | 0.156        | 0.2          | 0.032        | 0.061        |
| CD100um glrlm RLNU                       | -0.235      | 0.495       | -0.154      | 0.141       | 0.074       | 0.176       | -0.014      | -0.012      | -0.072      | -0.142       | 0.035        | 0.072        | 0.078        | -0.044       | 0.619        | 0.01         | 0.002        | 0.01         | -0.006       |
| CD100um glrlm RunVariance                | 0.089       | -0.074      | 0.675       | -0.172      | -0.13       | -0.057      | 0.084       | -0.009      | -0.211      | 0.005        | -0.131       | 0.062        | -0.009       | 0.249        | -0.154       | 0.192        | 0.223        | 0.036        | 0.07         |
| CD100um glszm SALGLE                     | -0.8        | -0.127      | 0.02        | -0.081      | 0.018       | -0.081      | -0.02       | -0.019      | 0.144       | -0.061       | 0.098        | 0.035        | 0.12         | 0.045        | -0.075       | -0.011       | 0.014        | 0.242        | 0.061        |
| CD100um glszm ZoneEntropy                | 0.766       | 0.315       | 0.114       | 0.161       | 0.031       | 0.07        | 0.099       | 0.004       | -0.024      | -0.119       | 0.093        | 0.197        | 0.031        | 0.088        | -0.044       | -0.049       | 0            | 0.109        | 0.006        |
| CD100um gldm LDHGLE                      | 0.491       | 0.258       | 0.262       | 0.385       | 0.015       | 0.103       | 0.018       | 0.15        | 0.058       | 0.085        | -0.056       | 0.082        | 0.445        | 0.04         | 0.068        | -0.108       | -0.022       | 0.012        | 0.051        |
| CD100um gldm LDLGLE                      | -0.112      | 0.033       | 0.845       | -0.097      | -0.042      | -0.013      | 0.065       | -0.019      | -0.121      | -0.038       | -0.093       | 0.037        | 0.008        | 0.138        | -0.074       | 0.105        | 0.096        | 0.055        | 0.031        |
| CD100um gldm SmallDependenceEmphasis     | -0.224      | 0.445       | -0.376      | 0.155       | 0.095       | 0.154       | -0.033      | -0.009      | -0.03       | -0.11        | 0.044        | 0.066        | 0.064        | -0.091       | 0.582        | -0.02        | -0.062       | 0.003        | -0.02        |
| CD100um gldm SDHGLE                      | 0.46        | 0.342       | 0.273       | 0.36        | 0.016       | 0.114       | 0.01        | 0.131       | 0.063       | 0.106        | -0.068       | 0.069        | 0.444        | 0.026        | 0.087        | -0.093       | 0.01         | 0.015        | 0.037        |
| CD100um gldm SDLGLE                      | -0.801      | -0.111      | 0.118       | -0.078      | 0.025       | -0.068      | -0.01       | -0.016      | 0.121       | -0.079       | 0.086        | 0.044        | 0.12         | 0.048        | -0.041       | -0.002       | 0.019        | 0.245        | 0.076        |
| CD100um ngtdm Busyness                   | 0.144       | -0.488      | -0.08       | -0.169      | 0.049       | 0.099       | -0.004      | 0.662       | -0.082      | 0.068        | -0.085       | -0.065       | -0.098       | -0.075       | -0.054       | 0.064        | 0.072        | -0.017       | 0.078        |
| CD100um ngtdm Coarseness                 | -0.807      | 0.262       | -0.068      | -0.054      | -0.083      | -0.073      | -0.061      | -0.091      | -0.02       | -0.01        | 0.14         | 0.138        | 0.01         | 0.002        | 0.022        | -0.082       | -0.128       | 0.029        | -0.114       |
| CD100um ngtdm Complexity                 | 0.498       | 0.445       | 0.388       | 0.144       | -0.015      | 0.136       | 0.102       | 0.229       | 0.13        | 0.085        | 0.129        | 0.025        | 0.197        | 0.074        | 0.141        | -0.044       | 0.033        | 0.072        | 0.079        |
| CD100um ngtdm Contrast                   | -0.443      | 0.701       | 0.165       | -0.003      | 0.03        | -0.003      | -0.006      | -0.103      | 0.096       | -0.039       | 0.182        | 0.157        | -0.024       | 0.032        | 0.005        | -0.032       | -0.003       | 0.008        | 0.081        |
| CD100um ngtdm Strength                   | -0.224      | 0.575       | 0.113       | -0.131      | -0.226      | -0.03       | 0.033       | -0.166      | 0.104       | 0.051        | 0.504        | -0.058       | -0.115       | 0.07         | 0.005        | -0.085       | 0.035        | -0.093       | -0.045       |
| CD150um firstorder 90Percentile          | 0.519       | 0.337       | 0.081       | 0.621       | -0.01       | 0.055       | 0.07        | 0.022       | 0.033       | -0.057       | 0.111        | 0.15         | 0.049        | 0.02         | 0.038        | -0.033       | -0.011       | 0.078        | 0.011        |
| CD150um firstorder InterquartileRange    | 0.351       | 0.558       | 0.157       | 0.064       | -0.107      | 0.063       | 0.03        | -0.085      | 0.098       | 0.02         | 0.197        | 0.456        | 0.132        | -0.138       | -0.013       | -0.067       | -0.014       | 0.106        | 0.014        |
| CD150um firstorder Kurtosis              | 0.08        | -0.197      | -0.017      | -0.14       | 0.02        | -0.141      | 0.156       | 0.018       | 0.041       | 0.018        | -0.043       | -0.739       | -0.031       | -0.009       | 0.1          | -0.029       | -0.016       | 0.051        | -0.06        |
| CD150um firstorder Maximum               | 0.671       | 0.315       | 0.061       | 0.409       | -0.043      | 0.054       | 0.152       | 0.108       | 0.02        | -0.055       | 0.133        | -0.02        | 0.00E+00     | 0.012        | 0.122        | -0.042       | -0.048       | 0.127        | 0.048        |
| CD150um firstorder MeanAbsoluteDeviation | 0.384       | 0.565       | 0.396       | 0.1         | -0.103      | 0.075       | 0.07        | -0.071      | 0.082       | -0.003       | 0.25         | 0.275        | 0.09         | -0.044       | 0.002        | -0.066       | 0.01         | 0.088        | 0.012        |
| CD150um firstorder Minimum               | 0.065       | 0.024       | -0.314      | 0.629       | 0.061       | -0.088      | -0.083      | -0.121      | -0.008      | -0.125       | 0.107        | 0.099        | -0.457       | 0.062        | 0.004        | -0.074       | 0.053        | -0.02        | 0.04         |
| CD150um firstorder Range                 | 0.679       | 0.322       | 0.205       | 0.149       | -0.072      | 0.097       | 0.198       | 0.168       | 0.025       | -0.002       | 0.092        | -0.066       | 0.208        | -0.015       | 0.126        | -0.011       | -0.074       | 0.142        | 0.032        |
| CD150um firstorder Skewness              | -0.084      | -0.056      | -0.214      | -0.693      | -0.135      | -0.102      | 0.018       | -0.093      | 0.109       | 0.172        | 0.255        | -0.21        | -0.172       | -0.024       | 0.012        | -0.088       | -0.049       | 0.195        | 0.01         |
| CD150um firstorder Uniformity            | -0.796      | -0.275      | 0.053       | -0.167      | -0.019      | -0.1        | -0.073      | -0.003      | 0.114       | 0.169        | -0.033       | -0.139       | 0.009        | -0.002       | -0.028       | 0.022        | 0.007        | 0.02         | 0.053        |
| CD150um glcm JointAverage                | 0.52        | 0.275       | 0.217       | 0.476       | -0.024      | 0.12        | 0.144       | 0.144       | 0.011       | 0.001        | -0.069       | 0.029        | 0.358        | -0.025       | 0.04         | 0.027        | -0.067       | 0.048        | -0.034       |



| <i>Pathomic feature name</i>         | <i>P_F1</i> | <i>P_F2</i> | <i>P_F3</i> | <i>P_F4</i> | <i>P_F5</i> | <i>P_F6</i> | <i>P_F7</i> | <i>P_F8</i> | <i>P_F9</i> | <i>P_F10</i> | <i>P_F11</i> | <i>P_F12</i> | <i>P_F13</i> | <i>P_F14</i> | <i>P_F15</i> | <i>P_F16</i> | <i>P_F17</i> | <i>P_F18</i> | <i>P_F19</i> |
|--------------------------------------|-------------|-------------|-------------|-------------|-------------|-------------|-------------|-------------|-------------|--------------|--------------|--------------|--------------|--------------|--------------|--------------|--------------|--------------|--------------|
| CD150um glcm ClusterProminence       | 0.129       | 0.208       | 0.832       | 0.004       | -0.088      | 0.084       | 0.073       | -0.025      | 0.08        | -0.08        | 0.178        | -0.033       | 0.008        | -0.026       | 0.048        | -0.032       | 0.051        | -0.034       | 0.019        |
| CD150um glcm ClusterShade            | 0.011       | -0.045      | -0.778      | -0.149      | -0.173      | -0.027      | -0.022      | -0.019      | 0.115       | 0.041        | 0.313        | 0.009        | -0.077       | 0.037        | 0.106        | 0.033        | 0.146        | 0.053        | 0.077        |
| CD150um glcm ClusterTendency         | 0.322       | 0.362       | 0.636       | 0.004       | -0.122      | 0.079       | 0.085       | -0.044      | 0.113       | -0.023       | 0.316        | 0.162        | 0.063        | -0.033       | 0.048        | -0.056       | 0.037        | 0.054        | 0.034        |
| CD150um glcm Contrast                | 0.052       | 0.772       | 0.336       | 0.122       | -0.056      | 0.129       | 0.059       | -0.099      | 0.121       | 0.119        | -0.046       | -0.028       | 0.077        | -0.107       | 0.006        | -0.003       | 0.072        | -0.017       | 0.053        |
| CD150um glcm Correlation             | 0.642       | -0.186      | 0.168       | -0.106      | -0.175      | -0.135      | 0.077       | 0.087       | -0.03       | 0.133        | 0.319        | 0.226        | -0.028       | 0.064        | -0.218       | -0.092       | -0.008       | -0.039       | -0.09        |
| CD150um glcm DifferenceAverage       | 0.008       | 0.851       | 0.177       | 0.099       | -0.019      | 0.111       | 0.02        | -0.098      | 0.071       | 0.07         | -0.058       | 0.041        | 0.07         | -0.061       | 0.063        | 0.016        | -0.029       | -0.019       | 0.019        |
| CD150um glcm DifferenceEntropy       | 0.662       | 0.485       | 0.186       | 0.146       | 0.064       | 0.135       | 0.047       | -0.105      | 0.071       | -0.06        | -0.11        | -0.025       | 0.085        | 0.019        | 0.064        | 0.059        | 0.049        | 0.006        | 0.047        |
| CD150um glcm DifferenceVariance      | 0.132       | 0.653       | 0.487       | 0.165       | -0.08       | 0.121       | 0.073       | -0.125      | 0.125       | 0.065        | 0.034        | -0.082       | 0.063        | -0.088       | 0.014        | -0.03        | 0.148        | 0.017        | 0.048        |
| CD150um glcm JointEnergy             | -0.846      | 0.125       | 0.073       | -0.026      | -0.002      | -0.013      | -0.061      | 0.013       | -0.01       | -0.092       | 0.079        | 0.136        | 0.099        | 0.01         | 0.144        | -0.033       | -0.029       | 0.13         | 0.068        |
| CD150um glcm Imc1                    | 0.566       | -0.533      | 0.006       | 0.053       | 0.1         | 0           | 0.028       | 0.351       | -0.133      | 0.019        | -0.149       | -0.147       | 0.023        | -0.027       | -0.002       | 0.082        | 0.055        | -0.059       | 0.084        |
| CD150um glcm Imc2                    | -0.199      | 0.271       | 0.073       | -0.039      | -0.152      | -0.074      | -0.015      | -0.741      | 0.077       | 0.003        | 0.05         | 0.164        | 0.042        | 0.081        | 0.026        | -0.073       | -0.059       | 0.132        | -0.038       |
| CD150um glcm Idm                     | 0.132       | -0.704      | 0.227       | -0.064      | -0.092      | 0.025       | -0.035      | 0.022       | 0.009       | 0.171        | 0.152        | -0.109       | -0.039       | -0.017       | -0.159       | -0.055       | 0.347        | -0.003       | -0.052       |
| CD150um glcm Idmn                    | 0.784       | -0.278      | -0.005      | -0.021      | -0.024      | -0.051      | 0.127       | 0.084       | -0.033      | 0.099        | 0.079        | -0.178       | -0.016       | 0.02         | -0.145       | 0.022        | -0.003       | -0.038       | -0.019       |
| CD150um glcm Id                      | 0.111       | -0.772      | 0.163       | -0.064      | -0.083      | -0.014      | -0.011      | 0.041       | -0.008      | 0.128        | 0.13         | -0.114       | -0.047       | -0.016       | -0.149       | -0.055       | 0.291        | 0.004        | -0.042       |
| CD150um glcm Idn                     | 0.76        | -0.337      | 0.036       | 0.025       | -0.034      | -0.027      | 0.157       | 0.129       | -0.045      | 0.039        | 0.118        | -0.178       | 0.02         | 0.01         | -0.079       | -0.012       | 0.033        | 0.04         | -0.004       |
| CD150um glcm InverseVariance         | -0.06       | -0.756      | -0.052      | -0.068      | 0.024       | 0.026       | -0.069      | 0.04        | 0.137       | 0.185        | 0.065        | -0.066       | -0.029       | 0.02         | -0.16        | -0.051       | 0.226        | 0.017        | -0.055       |
| CD150um glcm MaximumProbability      | -0.48       | 0.151       | 0.677       | -0.154      | -0.076      | 0.009       | -0.034      | -0.081      | -0.077      | -0.027       | -0.025       | 0.059        | -0.013       | 0.134        | -0.052       | 0.066        | 0.116        | 0.068        | 0.047        |
| CD150um glcm SumEntropy              | 0.879       | -0.059      | 0.102       | 0.111       | -0.015      | 0.05        | 0.066       | 0.057       | -0.002      | -0.007       | 0.014        | 0.101        | 0.073        | 0.012        | -0.031       | 0.001        | 0.042        | 0.048        | 0.011        |
| CD150um glcm SumSquares              | 0.287       | 0.465       | 0.613       | 0.028       | -0.116      | 0.093       | 0.085       | -0.057      | 0.121       | 0.004        | 0.262        | 0.133        | 0.07         | -0.049       | 0.042        | -0.049       | 0.047        | 0.043        | 0.039        |
| CD150um glrlm ShortRunEmphasis       | -0.411      | 0.484       | -0.292      | -0.032      | 0.144       | -0.06       | 0.019       | -0.033      | 0.077       | -0.072       | -0.266       | 0.129        | 0.033        | 0.111        | 0.087        | 0.094        | -0.341       | 0.041        | 0.002        |
| CD150um glszm GLNU                   | 0.292       | -0.202      | -0.047      | 0.053       | 0.009       | 0.157       | 0.062       | 0.797       | -0.059      | -0.019       | -0.021       | -0.004       | 0.065        | 0.041        | 0.002        | -0.016       | -0.039       | 0.034        | -0.03        |
| CD150um glszm GLNUN                  | -0.799      | -0.274      | -0.027      | -0.165      | -0.012      | -0.102      | -0.078      | 0           | 0.121       | 0.158        | -0.024       | -0.136       | 0.015        | -0.005       | -0.029       | 0.016        | -0.003       | 0.028        | 0.055        |
| CD150um glszm LALGLE                 | -0.138      | 0.042       | 0.699       | -0.172      | -0.125      | -0.071      | 0.076       | -0.02       | -0.215      | 0.025        | -0.108       | 0.113        | -0.004       | 0.229        | -0.096       | 0.187        | 0.194        | 0.04         | 0.028        |
| CD150um glszm LGLZE                  | -0.723      | 0.061       | 0.182       | -0.123      | -0.12       | -0.171      | -0.027      | -0.023      | 0.078       | 0.09         | 0.158        | 0.092        | 0.005        | 0.043        | -0.269       | -0.049       | 0.069        | 0.043        | -0.132       |
| CD150um glszm SAHGLE                 | 0.431       | 0.267       | 0.379       | 0.414       | -0.038      | 0.122       | 0.144       | 0.137       | 0.061       | 0.039        | -0.078       | 0.013        | 0.405        | -0.021       | 0.028        | 0.009        | -0.062       | 0.052        | -0.003       |
| CD150um glszm SALGLE                 | -0.737      | 0.059       | 0.03        | -0.118      | -0.119      | -0.176      | -0.038      | -0.02       | 0.089       | 0.084        | 0.17         | 0.096        | 0.006        | 0.039        | -0.266       | -0.058       | 0.063        | 0.05         | -0.131       |
| CD150um gldm DependenceEntropy       | 0.831       | 0.06        | 0.09        | 0.217       | -0.021      | 0.123       | 0.07        | 0.076       | -0.077      | -0.033       | 0.057        | 0.138        | 0.086        | -0.043       | 0.071        | -0.034       | 0.05         | 0.052        | -0.001       |
| CD150um gldm DependenceNonUniformity | 0.317       | -0.147      | -0.038      | 0.065       | -0.018      | 0.169       | 0.062       | 0.772       | -0.036      | -0.024       | -0.008       | 0.055        | 0.107        | 0.065        | 0.025        | -0.035       | -0.065       | 0.081        | -0.051       |
| CD150um gldm DNUN                    | -0.416      | 0.462       | -0.378      | -0.012      | 0.134       | -0.045      | -0.002      | -0.031      | 0.13        | -0.056       | -0.21        | 0.118        | 0.021        | 0.061        | 0.094        | 0.056        | -0.35        | 0.029        | 0.002        |
| CD150um gldm DependenceVariance      | 0.333       | -0.313      | 0.612       | -0.053      | -0.114      | 0.029       | 0.04        | 0.016       | -0.217      | 0.024        | 0.079        | -0.077       | -0.005       | 0.041        | -0.079       | 0.025        | 0.318        | -0.001       | 0.027        |
| CD150um ngtdm Busyness               | -0.236      | -0.501      | 0.004       | -0.283      | 0.009       | 0.015       | -0.095      | 0.446       | 0.091       | 0.37         | -0.071       | -0.044       | -0.051       | -0.118       | -0.025       | 0.043        | 0.079        | -0.004       | 0.085        |
| CD150um ngtdm Coarseness             | -0.816      | 0.128       | -0.076      | -0.067      | -0.082      | -0.075      | -0.04       | -0.167      | 0.066       | 0.025        | 0.164        | 0.097        | 0.039        | 0.025        | -0.032       | -0.073       | -0.097       | 0.041        | -0.103       |
| CD150um ngtdm Complexity             | 0.473       | 0.383       | 0.489       | 0.22        | -0.049      | 0.15        | 0.08        | 0.141       | 0.091       | 0.063        | 0.004        | 0.068        | 0.254        | -0.044       | 0.091        | -0.025       | 0.008        | 0.12         | 0.041        |

| <i>Pathomic feature name</i>          | <i>P_F1</i> | <i>P_F2</i> | <i>P_F3</i> | <i>P_F4</i> | <i>P_F5</i> | <i>P_F6</i> | <i>P_F7</i> | <i>P_F8</i> | <i>P_F9</i> | <i>P_F10</i> | <i>P_F11</i> | <i>P_F12</i> | <i>P_F13</i> | <i>P_F14</i> | <i>P_F15</i> | <i>P_F16</i> | <i>P_F17</i> | <i>P_F18</i> | <i>P_F19</i> |
|---------------------------------------|-------------|-------------|-------------|-------------|-------------|-------------|-------------|-------------|-------------|--------------|--------------|--------------|--------------|--------------|--------------|--------------|--------------|--------------|--------------|
| CD150um ngtdm Contrast                | -0.43       | 0.708       | 0.096       | -0.059      | -0.018      | -0.061      | -0.037      | -0.016      | 0.027       | 0.06         | 0.229        | 0.111        | -0.094       | 0.039        | -0.019       | -0.036       | -0.067       | -0.098       | 0.028        |
| CD150um ngtdm Strength                | -0.125      | 0.613       | 0.166       | -0.029      | -0.214      | -0.036      | 0.094       | -0.264      | 0.106       | -0.004       | 0.462        | 0.009        | -0.051       | 0.017        | -0.093       | -0.091       | -0.004       | -0.03        | -0.057       |
| CD200um firstorder 10Percentile       | 0.419       | 0.037       | -0.323      | 0.697       | 0.021       | 0.032       | 0.039       | 0.126       | -0.009      | -0.048       | -0.02        | 0.044        | 0.042        | 0.045        | -0.005       | -0.153       | -0.004       | -0.03        | 0.077        |
| CD200um firstorder InterquartileRange | 0.343       | 0.536       | 0.135       | 0.137       | -0.041      | 0.078       | 0.033       | -0.118      | 0.091       | 0.024        | 0.108        | 0.502        | 0.072        | -0.147       | 0.05         | -0.052       | -0.013       | 0.156        | -0.073       |
| CD200um firstorder Kurtosis           | 0.172       | -0.207      | 0.02        | -0.122      | 0.087       | -0.1        | 0.072       | 0.133       | 0.011       | -0.027       | 0.125        | -0.744       | 0.006        | 0.008        | -0.018       | 0.039        | 0.008        | -0.023       | 0.102        |
| CD200um firstorder Maximum            | 0.649       | 0.263       | 0.087       | 0.464       | -0.047      | 0.062       | 0.159       | 0.101       | 0.008       | -0.084       | 0.163        | 0.037        | 0.003        | 0.038        | 0.087        | -0.054       | -0.048       | 0.145        | 0.049        |
| CD200um firstorder MAD                | 0.38        | 0.538       | 0.379       | 0.191       | -0.057      | 0.061       | 0.066       | -0.093      | 0.082       | -0.025       | 0.254        | 0.292        | 0.045        | -0.065       | 0.085        | 0.063        | -0.008       | 0.148        | -0.041       |
| CD200um firstorder Median             | 0.457       | 0.19        | 0.076       | 0.736       | 0.015       | 0.048       | 0.081       | 0.072       | -0.027      | -0.091       | -0.088       | 0.048        | 0.056        | 0.008        | 0.009        | -0.032       | -0.03        | -0.006       | -0.028       |
| CD200um firstorder Minimum            | 0.113       | 0.13        | -0.317      | 0.599       | -0.049      | -0.021      | 0.03        | -0.194      | -0.004      | -0.016       | 0.086        | 0.028        | -0.299       | 0.16         | -0.017       | -0.245       | -0.058       | 0.068        | 0.079        |
| CD200um firstorder Range              | 0.68        | 0.233       | 0.264       | 0.213       | -0.027      | 0.081       | 0.164       | 0.216       | 0.011       | -0.089       | 0.142        | 0.028        | 0.166        | -0.043       | 0.107        | 0.07         | -0.021       | 0.125        | 0.01         |
| CD200um firstorder RMAD               | 0.367       | 0.519       | 0.26        | 0.173       | -0.038      | 0.049       | 0.049       | -0.134      | 0.069       | -0.005       | 0.174        | 0.396        | 0.057        | -0.143       | 0.087        | 0.144        | -0.061       | 0.172        | -0.103       |
| CD200um firstorder Skewness           | -0.16       | 0.007       | -0.178      | -0.645      | -0.121      | -0.066      | 0.036       | -0.129      | 0.128       | 0.169        | 0.359        | -0.074       | -0.072       | 0.056        | -0.004       | -0.187       | -0.039       | 0.246        | 0.122        |
| CD200um firstorder TotalEnergy        | 0.32        | -0.123      | -0.018      | 0.239       | -0.046      | 0.14        | 0.052       | 0.73        | 0.016       | -0.021       | 0.001        | 0.052        | 0.114        | 0.092        | 0.011        | -0.068       | -0.095       | 0.107        | -0.049       |
| CD200um firstorder Uniformity         | -0.865      | -0.073      | 0.012       | -0.106      | -0.034      | -0.074      | -0.061      | 0.017       | 0.033       | 0.146        | 0.062        | -0.031       | 0.053        | -0.053       | 0.104        | -0.006       | -0.063       | -0.002       | 0.044        |
| CD200um firstorder Variance           | 0.331       | 0.444       | 0.576       | 0.171       | -0.066      | 0.051       | 0.087       | -0.077      | 0.111       | -0.021       | 0.267        | 0.135        | 0.038        | -0.064       | 0.078        | 0.127        | 0            | 0.114        | -0.023       |
| CD200um glcm JointAverage             | 0.528       | 0.178       | 0.239       | 0.481       | 0.042       | 0.075       | 0.08        | 0.219       | -0.008      | -0.078       | -0.07        | 0.083        | 0.286        | -0.105       | 0.029        | 0.11         | 0.018        | -0.028       | -0.077       |
| CD200um glcm ClusterProminence        | 0.142       | 0.165       | 0.778       | 0.038       | -0.127      | 0.063       | 0.088       | -0.02       | 0.083       | -0.124       | 0.259        | -0.071       | -0.01        | -0.06        | 0.085        | 0.167        | 0.033        | -0.025       | -0.022       |
| CD200um glcm ClusterShade             | -0.002      | 0.005       | -0.696      | -0.181      | -0.207      | 0.011       | -0.004      | -0.031      | 0.146       | 0.057        | 0.32         | 0.031        | -0.076       | 0.063        | 0.081        | -0.177       | 0.207        | 0.034        | 0.118        |
| CD200um glcm ClusterTendency          | 0.336       | 0.291       | 0.614       | 0.072       | -0.134      | 0.051       | 0.088       | -0.056      | 0.101       | -0.085       | 0.362        | 0.144        | 0.047        | -0.079       | 0.097        | 0.153        | 0.001        | 0.081        | -0.023       |
| CD200um glcm Contrast                 | 0.065       | 0.749       | 0.318       | 0.166       | 0.131       | 0.06        | 0.086       | -0.096      | 0.13        | 0.172        | -0.116       | 0.033        | -0.044       | -0.047       | -0.058       | 0.04         | 0.021        | 0.096        | -0.023       |
| CD200um glcm Correlation              | 0.399       | -0.46       | 0.201       | -0.087      | -0.264      | -0.117      | -0.022      | 0.134       | -0.039      | -0.005       | 0.395        | 0.296        | 0.114        | -0.053       | 0.089        | 0.009        | -0.002       | -0.046       | 0.076        |
| CD200um glcm DifferenceAverage        | 0.06        | 0.829       | 0.188       | 0.149       | 0.086       | 0.062       | 0.049       | -0.118      | 0.039       | 0.098        | -0.1         | 0.067        | -0.025       | -0.042       | -0.054       | 0.01         | 0.006        | 0.075        | -0.111       |
| CD200um glcm DifferenceEntropy        | 0.806       | 0.147       | 0.174       | 0.126       | 0.133       | 0.118       | 0.053       | -0.083      | 0.044       | -0.057       | -0.113       | -0.058       | 0.05         | 0.02         | 0.003        | 0.085        | 0.078        | 0.072        | -0.015       |
| CD200um glcm DifferenceVariance       | 0.138       | 0.647       | 0.426       | 0.202       | 0.18        | 0.048       | 0.075       | -0.106      | 0.164       | 0.149        | -0.056       | 0.011        | -0.056       | 0.019        | -0.019       | 0.067        | -0.019       | 0.125        | 0.016        |
| CD200um glcm JointEnergy              | -0.832      | 0.17        | -0.008      | -0.007      | -0.043      | -0.025      | -0.069      | 0.025       | -0.059      | -0.087       | 0.085        | 0.138        | 0.095        | -0.032       | 0.152        | -0.027       | -0.073       | 0.108        | 0.014        |
| CD200um glcm JointEntropy             | 0.762       | -0.305      | 0.053       | 0.133       | 0.062       | 0.074       | 0.055       | 0.306       | -0.105      | -0.013       | -0.055       | 0.032        | 0.076        | -0.007       | 0.058        | 0.032        | 0.037        | 0.008        | 0.067        |
| CD200um glcm Imc2                     | -0.163      | 0.228       | 0.07        | -0.014      | -0.126      | -0.104      | -0.057      | -0.801      | 0.046       | 0.007        | 0.032        | 0.137        | 0.003        | 0.06         | 0.006        | -0.029       | -0.035       | 0.083        | -0.005       |
| CD200um glcm Idm                      | -0.048      | -0.746      | 0.163       | -0.067      | -0.085      | -0.001      | -0.025      | 0.097       | 0.189       | 0.291        | 0.01         | -0.074       | -0.026       | 0.032        | 0.002        | 0.186        | -0.019       | -0.041       | 0.198        |
| CD200um glcm Idmn                     | 0.558       | -0.606      | 0.04        | -0.011      | -0.076      | -0.032      | 0.092       | 0.146       | -0.004      | -0.092       | 0.129        | -0.121       | 0.135        | -0.033       | 0.074        | 0.04         | 0.049        | -0.001       | 0.175        |
| CD200um glcm Id                       | -0.049      | -0.79       | 0.106       | -0.082      | -0.071      | -0.002      | -0.023      | 0.111       | 0.167       | 0.199        | 0.025        | -0.091       | -0.009       | 0.032        | -0.001       | 0.154        | -0.004       | -0.043       | 0.204        |

| <i>Pathomic feature name</i>         | <i>P_F1</i> | <i>P_F2</i> | <i>P_F3</i> | <i>P_F4</i> | <i>P_F5</i> | <i>P_F6</i> | <i>P_F7</i> | <i>P_F8</i> | <i>P_F9</i> | <i>P_F10</i> | <i>P_F11</i> | <i>P_F12</i> | <i>P_F13</i> | <i>P_F14</i> | <i>P_F15</i> | <i>P_F16</i> | <i>P_F17</i> | <i>P_F18</i> | <i>P_F19</i> |
|--------------------------------------|-------------|-------------|-------------|-------------|-------------|-------------|-------------|-------------|-------------|--------------|--------------|--------------|--------------|--------------|--------------|--------------|--------------|--------------|--------------|
| CD200um glcm Idn                     | 0.562       | -0.578      | 0.057       | 0.031       | -0.026      | -0.001      | 0.11        | 0.197       | 0.046       | -0.081       | 0.151        | -0.107       | 0.107        | -0.002       | 0.095        | 0.071        | 0.025        | 0.028        | 0.212        |
| CD200um glcm InverseVariance         | -0.204      | -0.651      | -0.014      | -0.066      | 0.031       | -0.107      | 0.013       | 0.083       | 0.248       | 0.359        | 0.071        | -0.059       | 0.018        | 0.015        | 0.146        | -0.023       | -0.005       | 0.02         | 0.269        |
| CD200um glcm MaximumProbability      | -0.695      | 0.131       | 0.334       | -0.105      | -0.102      | 0.026       | -0.063      | -0.043      | 0.009       | -0.044       | -0.054       | 0.051        | 0.057        | 0.028        | 0.016        | 0.338        | -0.097       | 0.051        | 0.046        |
| CD200um glcm SumEntropy              | 0.844       | -0.233      | 0.101       | 0.13        | 0.018       | 0.066       | 0.039       | 0.095       | -0.023      | -0.005       | -0.048       | 0.074        | 0.067        | -0.01        | 0.049        | 0.046        | 0.017        | 0.04         | 0.045        |
| CD200um glcm SumSquares              | 0.302       | 0.437       | 0.603       | 0.103       | -0.081      | 0.059       | 0.097       | -0.072      | 0.119       | -0.028       | 0.278        | 0.131        | 0.028        | -0.08        | 0.067        | 0.14         | 0.007        | 0.094        | -0.025       |
| CD200um glrlm RunVariance            | 0.119       | -0.261      | 0.299       | -0.038      | -0.162      | -0.013      | 0.056       | 0.08        | -0.136      | 0.04         | -0.091       | -0.003       | -0.021       | 0.074        | -0.025       | 0.724        | -0.032       | -0.013       | 0.005        |
| CD200um glszm GLNUN                  | -0.868      | -0.058      | -0.026      | -0.102      | -0.023      | -0.066      | -0.061      | 0.02        | 0.03        | 0.132        | 0.066        | -0.023       | 0.054        | -0.05        | 0.111        | -0.033       | -0.06        | 0.001        | 0.045        |
| CD200um glszm LGLZE                  | -0.783      | 0.013       | 0.156       | -0.071      | -0.036      | -0.086      | -0.065      | -0.018      | 0.132       | 0.29         | 0.124        | 0.089        | -0.017       | -0.034       | 0.176        | -0.013       | 0.018        | 0.068        | 0.021        |
| CD200um glszm SmallAreaEmphasis      | -0.267      | 0.642       | -0.277      | -0.025      | 0.133       | -0.133      | 0.052       | -0.133      | -0.009      | -0.147       | 0.029        | 0.05         | 0.081        | 0.002        | 0.134        | -0.19        | 0.015        | 0.124        | -0.061       |
| CD200um glszm SALGLE                 | -0.796      | 0.011       | 0.055       | -0.067      | -0.014      | -0.088      | -0.076      | -0.016      | 0.134       | 0.287        | 0.112        | 0.101        | -0.013       | -0.038       | 0.175        | -0.048       | 0.006        | 0.078        | 0.021        |
| CD200um glszm ZoneEntropy            | 0.851       | -0.102      | 0.118       | 0.187       | 0.014       | 0.09        | 0.048       | 0.08        | -0.026      | -0.052       | -0.033       | 0.103        | 0.047        | 0            | 0.017        | 0.037        | 0.05         | 0.089        | 0.023        |
| CD200um gldm LDHGLE                  | 0.469       | 0.101       | 0.389       | 0.425       | 0.041       | 0.085       | 0.069       | 0.258       | 0.021       | -0.062       | -0.036       | 0.063        | 0.312        | -0.108       | 0.034        | 0.117        | -0.006       | -0.018       | -0.07        |
| CD200um gldm LDLGLE                  | -0.221      | 0.015       | 0.625       | -0.056      | -0.143      | -0.066      | 0.082       | -0.014      | -0.089      | 0.074        | 0.044        | 0.004        | -0.009       | 0.057        | 0.091        | 0.522        | 0.056        | 0.024        | -0.014       |
| CD200um gldm LowGrayLevelEmphasis    | -0.726      | 0.032       | 0.336       | -0.075      | -0.071      | -0.091      | -0.024      | -0.018      | 0.076       | 0.245        | 0.124        | 0.076        | -0.018       | -0.009       | 0.184        | 0.155        | 0.036        | 0.068        | 0.015        |
| CD200um gldm SmallDependenceEmphasis | -0.256      | 0.608       | -0.321      | -0.009      | 0.152       | -0.116      | 0.036       | -0.126      | 0.015       | -0.128       | 0.052        | 0.045        | 0.077        | -0.017       | 0.123        | -0.311       | 0.028        | 0.111        | -0.056       |
| CD200um ngtdm Busyness               | -0.495      | -0.294      | -0.013      | -0.33       | 0.051       | 0           | -0.043      | 0.337       | 0.015       | 0.436        | 0.048        | -0.047       | 0.003        | -0.08        | 0.042        | -0.034       | 0.01         | 0.107        | 0.076        |
| CD200um ngtdm Coarseness             | -0.78       | -0.08       | -0.043      | -0.134      | -0.19       | -0.084      | -0.093      | -0.194      | 0.204       | 0.038        | 0.077        | 0.053        | 0.065        | 0.067        | -0.104       | -0.041       | -0.024       | 0.049        | -0.027       |
| CD200um ngtdm Complexity             | 0.487       | 0.289       | 0.538       | 0.28        | 0.05        | 0.089       | 0.052       | 0.141       | 0.06        | 0.045        | -0.028       | 0.106        | 0.161        | -0.041       | 0.098        | 0.029        | -0.014       | 0.201        | -0.033       |
| CD200um ngtdm Contrast               | -0.475      | 0.646       | -0.009      | -0.015      | 0.011       | -0.098      | -0.039      | 0.038       | -0.124      | 0.09         | 0.229        | 0.141        | -0.064       | 0.002        | -0.006       | -0.05        | -0.141       | -0.112       | -0.062       |
| CD200um ngtdm Strength               | -0.072      | 0.399       | 0.209       | 0.021       | -0.305      | -0.018      | 0.088       | -0.305      | 0.2         | -0.121       | 0.56         | 0.016        | -0.086       | -0.009       | 0.046        | 0.031        | 0.12         | 0.012        | 0.017        |

**Table S8** Summary of the significantly correlated radiomic-pathomic factors, with radiomic factors associated with ADC. Abbreviations: ADC = Apparent Diffusion Coefficient; F = Factor; FDR = False Discovery Rate; BF = Bayes Factor.

| <b>Radiomic ADC factor name</b> | <b>Pathomic factor name</b> | <b><math>\rho</math></b> | <b>FDR q-value</b>    | <b>BF</b>          |
|---------------------------------|-----------------------------|--------------------------|-----------------------|--------------------|
| ADC_F5                          | P_F11                       | -0.543                   | $6.55 \times 10^{-3}$ | $3.00 \times 10^2$ |
| ADC_F4                          | P_F11                       | -0.538                   | $6.55 \times 10^{-3}$ | $2.55 \times 10^2$ |
| ADC_F1                          | P_F5                        | -0.525                   | $6.55 \times 10^{-3}$ | $1.65 \times 10^2$ |
| ADC_F1                          | P_F17                       | 0.516                    | $6.55 \times 10^{-3}$ | $1.24 \times 10^2$ |
| ADC_F2                          | P_F14                       | 0.475                    | $1.4 \times 10^{-2}$  | $3.63 \times 10^1$ |

**Table S9** Summary of the significantly correlated radiomic-pathomic factors, with radiomic factors associated with TIC. Abbreviations: TIC = post-contrast T1; F = Factor; FDR = False Discovery Rate; BF = Bayes Factor.

| Radiomic T1C factor name | Pathomic factor name | $\rho$ | FDR q-value           | BF                 |
|--------------------------|----------------------|--------|-----------------------|--------------------|
| T1C_F2                   | P_F11                | -0.628 | $2.70 \times 10^{-4}$ | $9.14 \times 10^3$ |
| T1C_F5                   | P_F8                 | -0.537 | $6.21 \times 10^{-3}$ | $2.45 \times 10^2$ |

## 4 Radiopathomic analysis with higher-order features

### 4.1 Materials and methods

Further higher order features were explored by extracting the first and second order features following application of wavelet and local binary pattern (LBP) filters to the images. The mathematical definition of each of the radiomic features can be found within the PyRadiomics documentation (<https://pyradiomics.readthedocs.io/en/latest/features.html>). The extracted higher-order radiomic features (from ADC and T1C) included (1) 728 wavelet features in frequency channels LHL, LLH, HHH, HLH, HLL,HHL, LHH and LLL, where L and H are low- and high-pass filters, respectively; (2) 353 Local Binary Pattern (2D and 3D). The extracted higher-order pathomic features included (1) 364 2D wavelet features in frequency channels LL, LH, HL and HH; (2) 84 Local Binary Pattern (2D). A first step of feature selection was performed separately for wavelet features and LBP features by means of a correlation filter based on the absolute values of pairwise Spearman's correlation ( $\rho$ ) coefficient to reduce feature redundancy. Threshold for  $\rho$  was set to 0.9. Then, to check for redundancies among features belonging to the different groups, the same correlation filter was applied to the whole feature set passed the first step of feature selection. The second step was performed also considering original features that passed the feature selection step described in paragraph 2.6.1 in the main text. Correlation analysis and factor analysis were performed according to 2.6.1 and 2.6.2 paragraphs in the main text.

### 4.2 Results

#### 4.2.1 Correlation analysis

Concerning ADC radiomic features, the first correlation filter step reduced the feature set from 91, 728 and 353 to 46, 182 and 143, respectively for original, wavelet and LBP. The second step of correlation filter among features belonging to different groups reduced the ADC radiomic feature set to 340. Concerning T1C radiomic features, the first correlation filter step reduced the feature set from 91, 728 and 353 to 53, 202 and 135, respectively for original, wavelet and LBP. The second step of correlation filter among features belonging to different groups reduced the T1C radiomic feature set to 362. On the other hand, pathomic features were reduced from 429, 1456 and 336 to 232, 362 and 115, respectively for original, wavelet and LBP. The second step of correlation filter among features belonging to different groups reduced the pathomic feature set to 352. Radiopathomic analysis between selected ADC radiomic features and pathomic features revealed 671 significant correlations (based on adjusted p-values after FDR correction), of which 154 negative correlations ( $-0.753 < \rho < -0.501$ ,  $77.5 < \text{BF} < 1.74 \times 10^7$ ) and 517 positive correlations ( $0.501 < \rho < 0.785$ ,  $21.6563 < \text{BF} < 6.461 \times 10^5$ ). Among features constituting the ADC-radiopathomic couples showing significant cross-scale associations, ADC radiomic features included 6 firstorder

features, 9 texture features, 119 wavelet and 34 LBP features, while pathomic features included 11 features from detection measurements and 43 cell-density map features, of which 4 from 50 $\mu$ m resolution (2 texture, 2 wavelet), 10 from 100 $\mu$ m resolution (7 lbp and 3 texture), 11 from 150 $\mu$ m resolution (3 texture, 2 wavelet and 2 lbp) and 18 from 200 $\mu$ m resolution (1 firstorder, 1 texture, 13 wavelet, 3 lbp).

Concerning ADC pipeline, most of the strong relationships (250/350) involved features from cell density maps, of which 211 correspond to associations with ADC wavelet features, 8 with ADC LBP, 5 texture and 4 firstorder ADC features. The remaining strongest associations (100/350) involved intranuclear Haralick texture features (Haralick Angular Second Moment F0 and Information measure of correlation 2 F12) with ADC wavelet features (93 associations), firstorder and lbp features (3 and 1 associations, respectively).

Radiopathomic analysis between selected T1C radiomic features and pathomic features revealed 127 significant correlations (based on adjusted p-values after FDR correction), of which 54 negative correlations ( $-0.762 < \rho < -0.55$ ,  $384.99 < BF < 3.61 \times 10^7$ ) and 73 positive correlations ( $0.553 < \rho < 0.778$ ,  $422.44 < BF < 3.79 \times 10^8$ ). Among features constituting the T1C-radiopathomic couples showing significant cross-scale associations, T1C radiomic features included 3 firstorder features, 2 texture features, 11 LBP and 39 wavelet features, while pathomic features included 3 features from detection measurements and 25 cell-density map features, of which 9 from 50 $\mu$ m resolution (2 texture, 7 wavelet), 4 from 100 $\mu$ m resolution (2 texture, 2 LBP), 3 from 150 $\mu$ m resolution (2 texture, 1 wavelet) and 9 from 200 $\mu$ m resolution (1 firstorder, 2 texture, 5 wavelet, 1 LBP).

Concerning T1C pipeline, similar findings were observed, with most of the strongest associations found between cell density map features and T1C wavelet (33/57), firstorder (7/57), and LBP (3/57). The remaining three associations involving the same two intranuclear Haralick texture features observed in the ADC results and two T1C wavelet features. Similar findings, concerning both ADC and T1C radiopathomic tasks, were observed for significant moderate correlations.

Figure S1 and S2 show the resulting correlation heatmaps for the strongest radiopathomic associations ( $|\rho| \geq 0.6$ ), displaying Spearman's  $\rho$  between radiomic features (from ADC and T1C, respectively) and pathomic features.

The entire set of significant radiopathomic associations sorted by  $\rho$  strength are presented in Table S10 and S11.

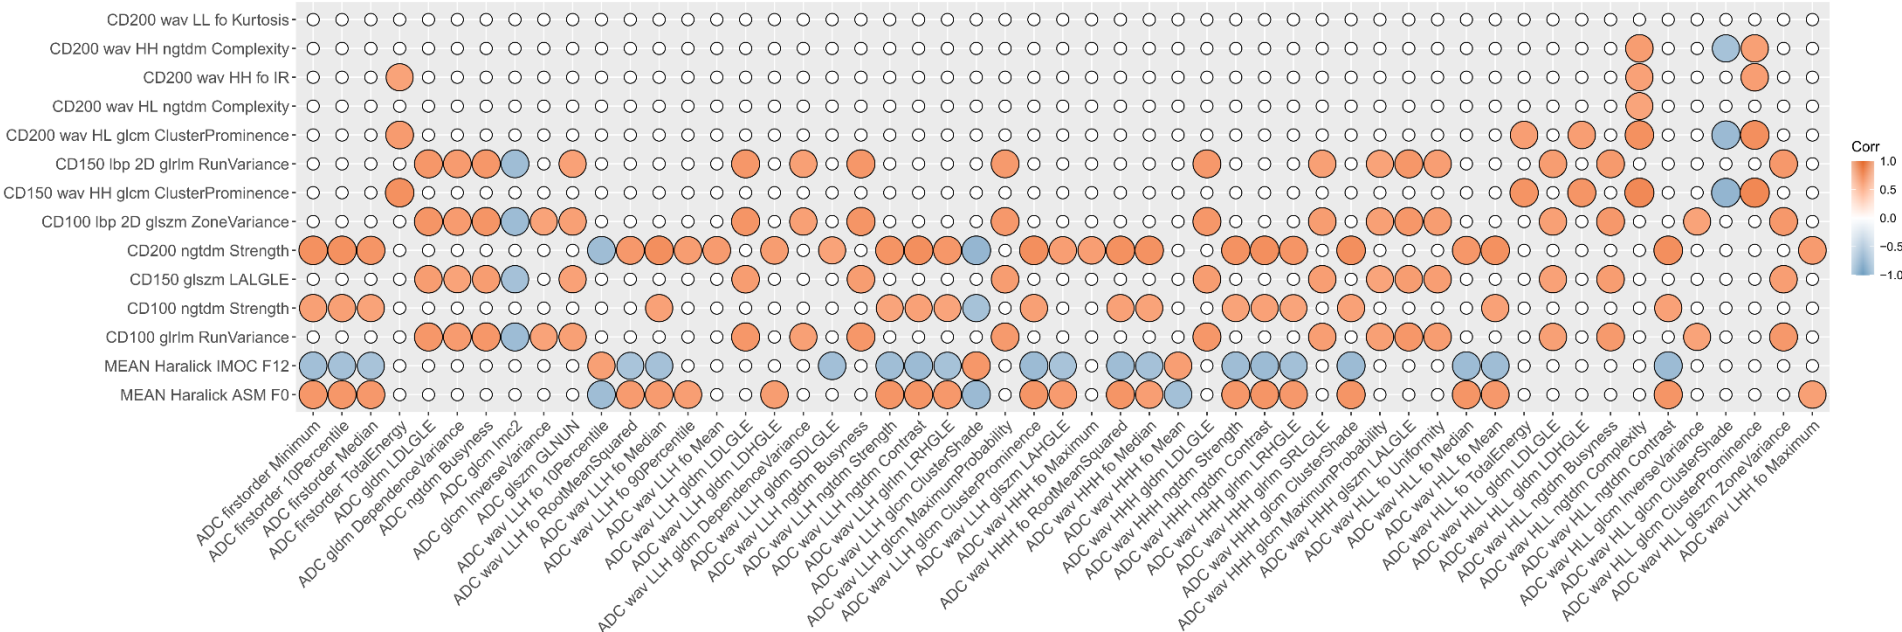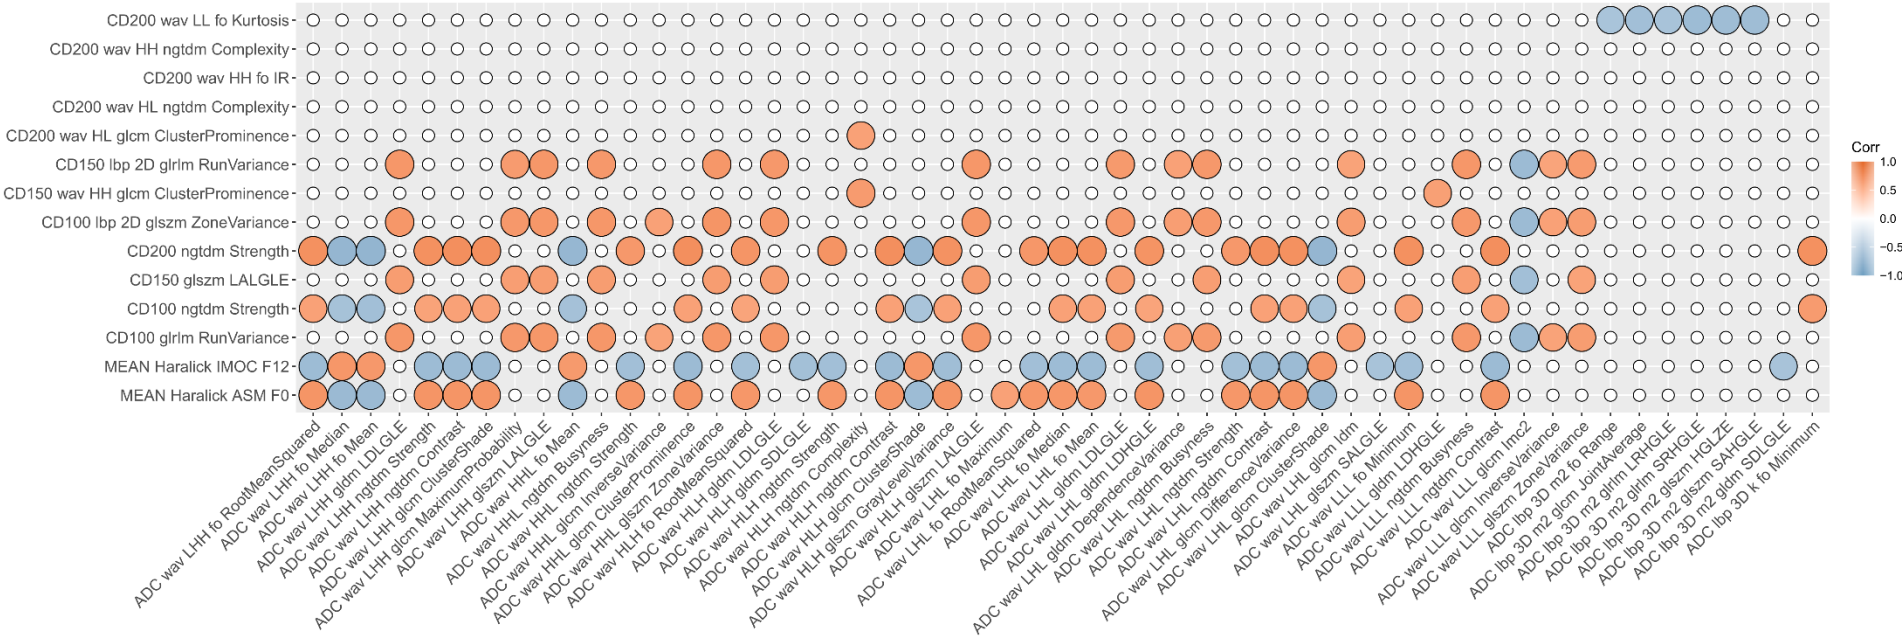

**Figure S1** Radiopathomic analysis between ADC radiomic features and pathomic features. Correlation matrix filtered from nonsignificant correlations and moderate significant correlations (rows and columns with nonsignificant and moderate significant values were deleted, while nonsignificant values surviving were set to zero). For an easier interpretation, the correlation matrix was splitted in two submatrices. Abbreviations: ADC = Apparent Diffusion Coefficient; LALGLE = Large Area Low Gray Level Emphasis; LDLGLE = Large Dependence Low Gray Level Emphasis; LDHGLE = Large Dependence High Gray Level Emphasis; SDLGLE = Small Dependence Low Gray Level Emphasis; LALGLE = Large Area Low Gray Level Emphasis; GLNUN = Gray level non uniformity normalized; SZNU = Size Zone Non-Uniformity; glcm = gray level co-occurrence matrix; gldm = Gray Level Dependence Matrix; glszm = Gray Level Size Zone Matrix; ngtdm = Neighbouring Gray Tone Difference Matrix; glrlm = Gray Level Run Length Matrix; wav = wavelet; lbp = local binary pattern; L = Low-pass filter; H = High-pass filter.

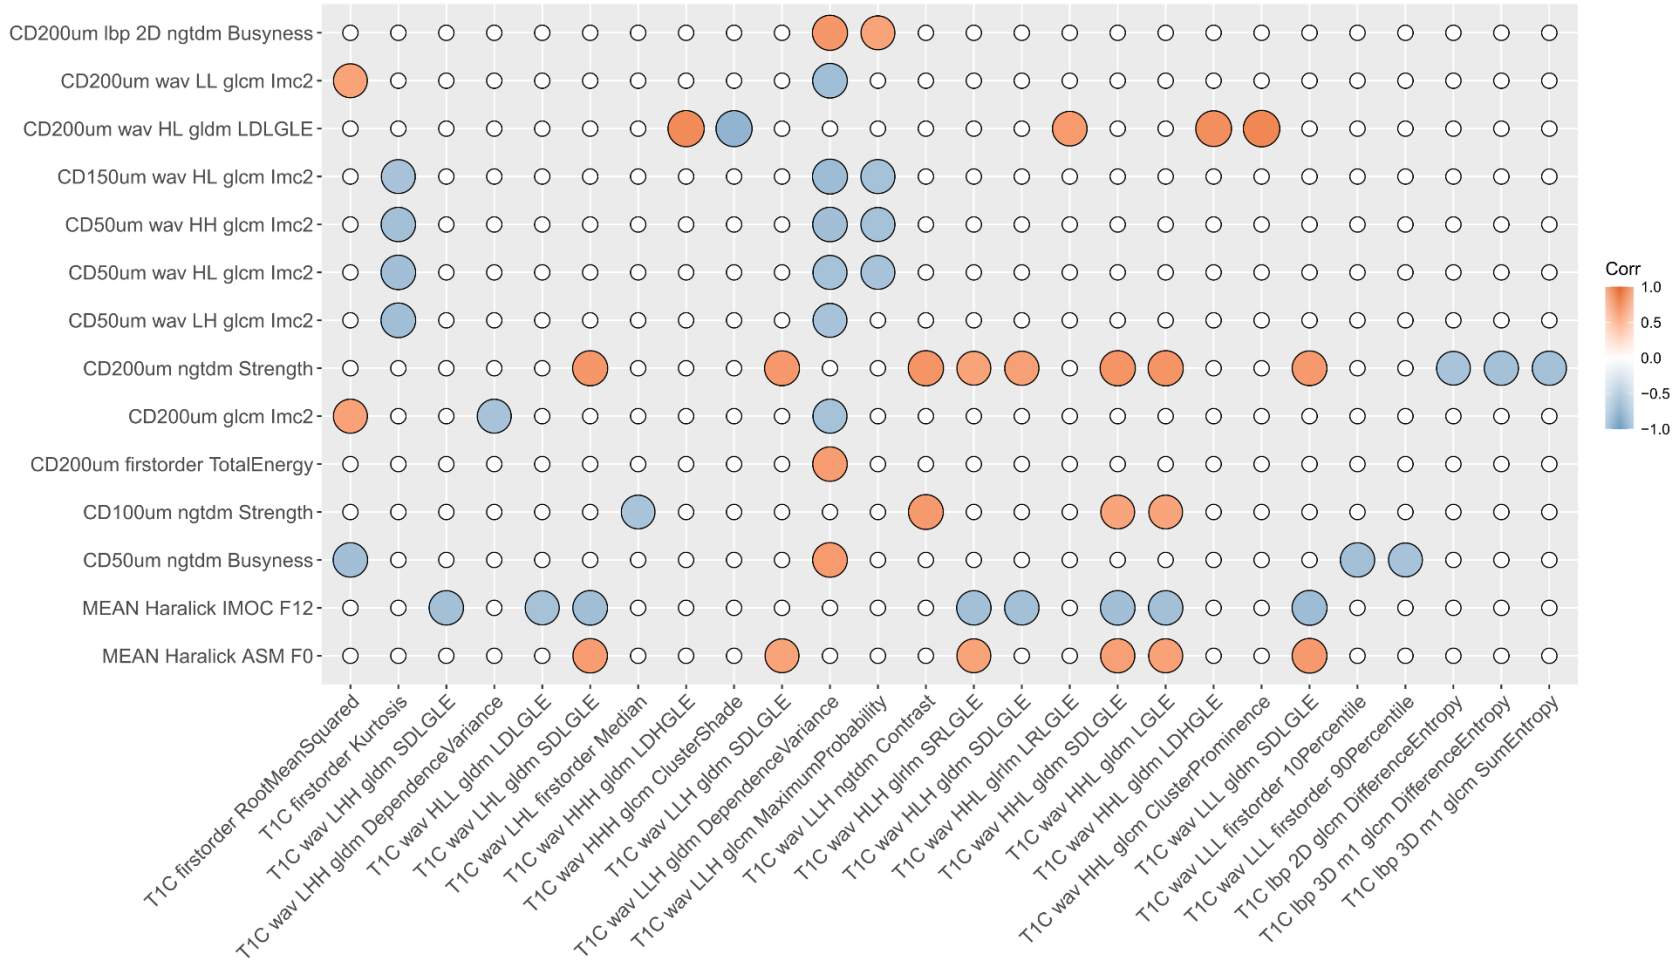

**Figure S2** Radiopathomic analysis between T1C radiomic features and pathomic features. Correlation matrix filtered from nonsignificant correlations and moderate significant correlations (rows and columns with nonsignificant and moderate significant values were deleted, while nonsignificant values surviving were set to zero). Abbreviations: T1C = post-contrast T1; LDLGLE = Large Dependence Low Gray Level Emphasis; LDHGLE = Large Dependence High Gray Level Emphasis; SDLGLE = Small Dependence Low Gray Level Emphasis; LALGLE = Large Area Low Gray Level Emphasis; GLNUN = Gray level non uniformity normalized; ASM = Angular Second Moment; IMOC = Information Measure of Correlation; glcm = gray level co-occurrence matrix; gldm = Gray Level Dependence Matrix; glszm = Gray Level Size Zone Matrix; ngtdm = Neighbouring Gray Tone Difference Matrix; glrlm = Gray Level Run Length Matrix; wav = wavelet; lbp = local binary pattern; L = Low-pass filter; H = High-pass filter.

**Table S9** Summary of the significantly correlated radiomic-pathomic features, with radiomic features extracted from ADC. Abbreviations: ADC = Apparent Diffusion Coefficient; BF = Bayes Factor; LALGLE = Large Area Low Gray Level Emphasis; LDLGLE = Large Dependence Low Gray Level Emphasis; LDHGLE = Large Dependence High Gray Level Emphasis; SDLGLE = Small Dependence Low Gray Level Emphasis; LALGLE = Large Area Low Gray Level Emphasis; GLNUN = Gray level non uniformity normalized; SZNU = Size Zone Non-Uniformity; ASM = Angular Second Moment; IMOC = Information Measure of Correlation; glcm = gray level co-occurrence matrix; gldm = Gray Level Dependence Matrix; glszm = Gray Level Size Zone Matrix; ngtdm = Neighbouring Gray Tone Difference Matrix; glrlm = Gray Level Run Length Matrix; wav = wavelet; lbp = local binary pattern; L = Low-pass filter; H = High-pass filter.

| Radiomic feature name              | Pathomic feature name                 | $\rho$                | Q-value | BF                 |
|------------------------------------|---------------------------------------|-----------------------|---------|--------------------|
| ADC wav HLL glcm ClusterProminence | CD150um wav HH glcm ClusterProminence | $3.01 \times 10^{-6}$ | 0.785   | $2.77 \times 10^8$ |
| ADC wav HLL ngtdm Complexity       | CD150um wav HH glcm ClusterProminence | $3.01 \times 10^{-6}$ | 0.782   | $2.14 \times 10^8$ |
| ADC wav LHH firstorder Mean        | CD200um ngtdm Strength                | $1.31 \times 10^{-5}$ | -0.753  | $1.74 \times 10^7$ |
| ADC wav HLL glcm ClusterShade      | CD150um wav HH glcm ClusterProminence | $1.31 \times 10^{-5}$ | -0.747  | $1.15 \times 10^7$ |
| ADC wav LHH firstorder Median      | CD200um ngtdm Strength                | $1.31 \times 10^{-5}$ | -0.742  | $7.89 \times 10^6$ |
| ADC wav HLL glcm ClusterProminence | CD200um wav HL glcm ClusterProminence | $1.31 \times 10^{-5}$ | 0.742   | $7.58 \times 10^6$ |
| ADC wav LLH glcm ClusterProminence | CD200um ngtdm Strength                | $1.31 \times 10^{-5}$ | 0.741   | $7.17 \times 10^6$ |
| ADC wav LHL glcm ClusterShade      | CD200um ngtdm Strength                | $1.31 \times 10^{-5}$ | -0.74   | $6.87 \times 10^6$ |
| ADC wav LHH ngtdm Contrast         | CD200um ngtdm Strength                | $1.31 \times 10^{-5}$ | 0.74    | $6.62 \times 10^6$ |
| ADC wav LHL ngtdm Contrast         | CD200um ngtdm Strength                | $1.31 \times 10^{-5}$ | 0.74    | $6.62 \times 10^6$ |
| ADC wav LLH ngtdm Contrast         | CD200um ngtdm Strength                | $1.31 \times 10^{-5}$ | 0.74    | $6.60 \times 10^6$ |
| ADC wav HHH ngtdm Contrast         | CD200um ngtdm Strength                | $1.31 \times 10^{-5}$ | 0.74    | $6.58 \times 10^6$ |
| ADC wav HLH ngtdm Contrast         | CD200um ngtdm Strength                | $1.31 \times 10^{-5}$ | 0.74    | $6.54 \times 10^6$ |
| ADC wav LLL ngtdm Contrast         | CD200um ngtdm Strength                | $1.31 \times 10^{-5}$ | 0.74    | $6.49 \times 10^6$ |
| ADC wav LHH glcm ClusterShade      | CD200um ngtdm Strength                | $1.31 \times 10^{-5}$ | 0.74    | $6.49 \times 10^6$ |



| Radiomic feature name                  | Pathomic feature name                 | $\rho$                | Q-value | BF                 |
|----------------------------------------|---------------------------------------|-----------------------|---------|--------------------|
| ADC wav HHH glcm ClusterShade          | CD200um ngtdm Strength                | $1.31 \times 10^{-5}$ | 0.739   | $6.32 \times 10^6$ |
| ADC wav HHL glcm ClusterProminence     | CD200um ngtdm Strength                | $1.31 \times 10^{-5}$ | 0.739   | $6.24 \times 10^6$ |
| ADC wav HLL ngtdm Contrast             | CD200um ngtdm Strength                | $1.31 \times 10^{-5}$ | 0.739   | $6.20 \times 10^6$ |
| ADC wav LLH glcm ClusterShade          | CD200um ngtdm Strength                | $1.31 \times 10^{-5}$ | -0.738  | $5.88 \times 10^6$ |
| ADC wav LLH firstorder Median          | CD200um ngtdm Strength                | $1.32 \times 10^{-5}$ | 0.737   | $5.52 \times 10^6$ |
| ADC wav HHL firstorder Mean            | CD200um ngtdm Strength                | $1.55 \times 10^{-5}$ | -0.734  | $4.40 \times 10^6$ |
| ADC wav LHL glcm DifferenceVariance    | CD200um ngtdm Strength                | $1.55 \times 10^{-5}$ | 0.734   | $4.33 \times 10^6$ |
| ADC lbp 3D k firstorder Minimum        | CD200um ngtdm Strength                | $1.68 \times 10^{-5}$ | 0.732   | $3.83 \times 10^6$ |
| ADC wav LHL firstorder Median          | CD200um ngtdm Strength                | $1.72 \times 10^{-5}$ | 0.73    | $3.36 \times 10^6$ |
| ADC wav LLL firstorder Minimum         | CD200um ngtdm Strength                | $1.72 \times 10^{-5}$ | 0.73    | $3.34 \times 10^6$ |
| ADC wav LHH firstorder RootMeanSquared | CD200um ngtdm Strength                | $1.72 \times 10^{-5}$ | 0.73    | $3.17 \times 10^6$ |
| ADC firstorder Minimum                 | CD200um ngtdm Strength                | $1.72 \times 10^{-5}$ | 0.729   | $3.15 \times 10^6$ |
| ADC wav HLL ngtdm Complexity           | CD200um wav HL glcm ClusterProminence | $1.72 \times 10^{-5}$ | 0.729   | $3.11 \times 10^6$ |
| ADC firstorder TotalEnergy             | CD150um wav HH glcm ClusterProminence | $1.78 \times 10^{-5}$ | 0.728   | $2.87 \times 10^6$ |
| ADC wav LHL firstorder Mean            | CD200um ngtdm Strength                | $1.78 \times 10^{-5}$ | 0.728   | $2.76 \times 10^6$ |
| ADC wav HLL firstorder Mean            | CD200um ngtdm Strength                | $1.78 \times 10^{-5}$ | 0.727   | $2.73 \times 10^6$ |
| ADC wav HHH firstorder RootMeanSquared | CD200um ngtdm Strength                | $1.85 \times 10^{-5}$ | 0.726   | $2.52 \times 10^6$ |
| ADC wav HLH glcm ClusterShade          | CD200um ngtdm Strength                | $1.85 \times 10^{-5}$ | -0.726  | $2.47 \times 10^6$ |
| ADC firstorder 10Percentile            | CD200um ngtdm Strength                | $1.86 \times 10^{-5}$ | 0.725   | $2.36 \times 10^6$ |
| ADC wav LHH ngtdm Strength             | CD200um ngtdm Strength                | $1.86 \times 10^{-5}$ | 0.725   | $2.32 \times 10^6$ |
| ADC wav HHH firstorder Median          | CD200um ngtdm Strength                | $2.07 \times 10^{-5}$ | 0.723   | $2.04 \times 10^6$ |
| ADC wav HLH glszm GrayLevelVariance    | CD200um ngtdm Strength                | $2.18 \times 10^{-5}$ | 0.722   | $1.85 \times 10^6$ |
| ADC wav HHH ngtdm Strength             | CD200um ngtdm Strength                | $2.18 \times 10^{-5}$ | 0.722   | $1.84 \times 10^6$ |
| ADC wav LLH ngtdm Strength             | CD200um ngtdm Strength                | $4.93 \times 10^{-5}$ | 0.709   | $8.19 \times 10^5$ |
| ADC wav LHL gldm LDHGLE                | CD200um ngtdm Strength                | $5.15 \times 10^{-5}$ | 0.708   | $7.62 \times 10^5$ |
| ADC wav HLL firstorder TotalEnergy     | CD150um wav HH glcm ClusterProminence | $5.15 \times 10^{-5}$ | 0.708   | $7.49 \times 10^5$ |
| ADC wav HLH ngtdm Strength             | CD200um ngtdm Strength                | $5.28 \times 10^{-5}$ | 0.707   | $7.15 \times 10^5$ |
| ADC wav LHH firstorder Mean            | MEAN ODSum Haralick ASM F0            | $6.09 \times 10^{-5}$ | -0.704  | $5.80 \times 10^5$ |
| ADC wav LLH glcm ClusterProminence     | MEAN ODSum Haralick ASM F0            | $6.09 \times 10^{-5}$ | 0.704   | $5.71 \times 10^5$ |
| ADC wav LHL glcm DifferenceVariance    | MEAN ODSum Haralick ASM F0            | $6.09 \times 10^{-5}$ | 0.703   | $5.27 \times 10^5$ |
| ADC wav HLL gldm LDHGLE                | CD150um wav HH glcm ClusterProminence | $6.09 \times 10^{-5}$ | 0.701   | $4.93 \times 10^5$ |

| Radiomic feature name                  | Pathomic feature name                 | $\rho$                | Q-value | BF                 |
|----------------------------------------|---------------------------------------|-----------------------|---------|--------------------|
| ADC wav HHH glrlm LRHGLE               | CD200um ngtdm Strength                | $6.09 \times 10^{-5}$ | 0.701   | $4.81 \times 10^5$ |
| ADC wav HHL glcm ClusterProminence     | MEAN ODSum Haralick ASM F0            | $6.09 \times 10^{-5}$ | 0.701   | $4.66 \times 10^5$ |
| ADC wav HLL glcm ClusterShade          | CD200um wav HL glcm ClusterProminence | $6.09 \times 10^{-5}$ | -0.7    | $4.63 \times 10^5$ |
| ADC wav LHH firstorder RootMeanSquared | MEAN ODSum Haralick ASM F0            | $6.09 \times 10^{-5}$ | 0.7     | $4.45 \times 10^5$ |
| ADC wav LHH firstorder Median          | MEAN ODSum Haralick ASM F0            | $6.09 \times 10^{-5}$ | -0.699  | $4.35 \times 10^5$ |
| ADC wav HLH glszm GrayLevelVariance    | MEAN ODSum Haralick ASM F0            | $6.09 \times 10^{-5}$ | 0.699   | $4.23 \times 10^5$ |
| ADC firstorder Median                  | CD200um ngtdm Strength                | $6.09 \times 10^{-5}$ | 0.698   | $4.06 \times 10^5$ |
| ADC wav LHL glcm ClusterShade          | MEAN ODSum Haralick ASM F0            | $6.09 \times 10^{-5}$ | -0.698  | $4.06 \times 10^5$ |
| ADC wav LHL gldm LDHGLE                | MEAN ODSum Haralick ASM F0            | $6.09 \times 10^{-5}$ | 0.698   | $4.00 \times 10^5$ |
| ADC wav HLL ngtdm Contrast             | MEAN ODSum Haralick ASM F0            | $6.09 \times 10^{-5}$ | 0.697   | $3.83 \times 10^5$ |
| ADC wav LLL firstorder Minimum         | MEAN ODSum Haralick ASM F0            | $6.09 \times 10^{-5}$ | 0.697   | $3.78 \times 10^5$ |
| ADC wav HLH ngtdm Contrast             | MEAN ODSum Haralick ASM F0            | $6.09 \times 10^{-5}$ | 0.697   | $3.76 \times 10^5$ |
| ADC wav LLL ngtdm Contrast             | MEAN ODSum Haralick ASM F0            | $6.09 \times 10^{-5}$ | 0.697   | $3.75 \times 10^5$ |
| ADC wav LLH ngtdm Contrast             | MEAN ODSum Haralick ASM F0            | $6.09 \times 10^{-5}$ | 0.697   | $3.72 \times 10^5$ |
| ADC wav HHH firstorder RootMeanSquared | MEAN ODSum Haralick ASM F0            | $6.09 \times 10^{-5}$ | 0.697   | $3.72 \times 10^5$ |
| ADC wav HHH ngtdm Contrast             | MEAN ODSum Haralick ASM F0            | $6.09 \times 10^{-5}$ | 0.697   | $3.71 \times 10^5$ |
| ADC wav LHL ngtdm Contrast             | MEAN ODSum Haralick ASM F0            | $6.09 \times 10^{-5}$ | 0.697   | $3.70 \times 10^5$ |
| ADC wav LHH ngtdm Contrast             | MEAN ODSum Haralick ASM F0            | $6.09 \times 10^{-5}$ | 0.697   | $3.70 \times 10^5$ |
| ADC gldm LDLGLE                        | CD100um lbp 2D glszm ZoneVariance     | $6.09 \times 10^{-5}$ | 0.697   | $3.67 \times 10^5$ |
| ADC wav LHH ngtdm Strength             | MEAN ODSum Haralick ASM F0            | $6.09 \times 10^{-5}$ | 0.697   | $3.67 \times 10^5$ |
| ADC wav LLH ngtdm Strength             | MEAN ODSum Haralick ASM F0            | $6.09 \times 10^{-5}$ | 0.697   | $3.64 \times 10^5$ |
| ADC wav LLH ngtdm Busyness             | CD100um lbp 2D glszm ZoneVariance     | $6.09 \times 10^{-5}$ | 0.696   | $3.61 \times 10^5$ |
| ADC wav LHH glcm ClusterShade          | MEAN ODSum Haralick ASM F0            | $6.09 \times 10^{-5}$ | 0.696   | $3.58 \times 10^5$ |
| ADC wav HLL firstorder Median          | MEAN ODSum Haralick ASM F0            | $6.09 \times 10^{-5}$ | 0.696   | $3.58 \times 10^5$ |
| ADC wav HLH firstorder RootMeanSquared | CD200um ngtdm Strength                | $6.09 \times 10^{-5}$ | 0.696   | $3.50 \times 10^5$ |
| ADC wav HHH glcm ClusterShade          | MEAN ODSum Haralick ASM F0            | $6.09 \times 10^{-5}$ | 0.696   | $3.43 \times 10^5$ |
| ADC wav LLH glcm ClusterShade          | MEAN ODSum Haralick ASM F0            | $6.09 \times 10^{-5}$ | -0.695  | $3.40 \times 10^5$ |
| ADC wav LLH gldm LDLGLE                | CD100um lbp 2D glszm ZoneVariance     | $6.09 \times 10^{-5}$ | 0.695   | $3.40 \times 10^5$ |
| ADC ngtdm Busyness                     | CD100um lbp 2D glszm ZoneVariance     | $6.09 \times 10^{-5}$ | 0.695   | $3.39 \times 10^5$ |

| Radiomic feature name          | Pathomic feature name             | p                     | Q-value | BF                   |
|--------------------------------|-----------------------------------|-----------------------|---------|----------------------|
| ADC wav HHL glszm ZoneVariance | CD100um lbp 2D glszm ZoneVariance | 6.09×10 <sup>-5</sup> | 0.695   | 3.37×10 <sup>5</sup> |
| ADC wav LHH glszm LALGLE       | CD100um lbp 2D glszm ZoneVariance | 6.09×10 <sup>-5</sup> | 0.695   | 3.29×10 <sup>5</sup> |
| ADC wav HHH glszm LALGLE       | CD100um lbp 2D glszm ZoneVariance | 6.09×10 <sup>-5</sup> | 0.695   | 3.27×10 <sup>5</sup> |
| ADC wav HLH glszm LALGLE       | CD100um lbp 2D glszm ZoneVariance | 6.09×10 <sup>-5</sup> | 0.695   | 3.26×10 <sup>5</sup> |
| ADC wav HLL firstorder Median  | CD200um ngtdm Strength            | 6.09×10 <sup>-5</sup> | 0.695   | 3.23×10 <sup>5</sup> |
| ADC firstorder Minimum         | MEAN ODSum Haralick ASM F0        | 6.09×10 <sup>-5</sup> | 0.694   | 3.16×10 <sup>5</sup> |
| ADC wav LHH gldm LDLGLE        | CD100um lbp 2D glszm ZoneVariance | 6.09×10 <sup>-5</sup> | 0.694   | 3.03×10 <sup>5</sup> |
| ADC wav LLL glcm Imc2          | CD100um lbp 2D glszm ZoneVariance | 6.09×10 <sup>-5</sup> | -0.693  | 3.00×10 <sup>5</sup> |
| ADC gldm LDLGLE                | CD100um glrlm RunVariance         | 6.09×10 <sup>-5</sup> | 0.693   | 3.00×10 <sup>5</sup> |
| ADC wav HHH gldm LDLGLE        | CD100um lbp 2D glszm ZoneVariance | 6.09×10 <sup>-5</sup> | 0.692   | 2.84×10 <sup>5</sup> |
| ADC wav HHL ngtdm Busyness     | CD100um lbp 2D glszm ZoneVariance | 6.09×10 <sup>-5</sup> | 0.692   | 2.78×10 <sup>5</sup> |
| ADC wav LLH ngtdm Busyness     | CD100um glrlm RunVariance         | 6.09×10 <sup>-5</sup> | 0.692   | 2.77×10 <sup>5</sup> |
| ADC wav HHH ngtdm Strength     | MEAN ODSum Haralick ASM F0        | 6.09×10 <sup>-5</sup> | 0.692   | 2.72×10 <sup>5</sup> |
| ADC wav HHL glszm ZoneVariance | CD100um glrlm RunVariance         | 6.09×10 <sup>-5</sup> | 0.692   | 2.71×10 <sup>5</sup> |
| ADC wav LLH gldm LDLGLE        | CD100um glrlm RunVariance         | 6.09×10 <sup>-5</sup> | 0.692   | 2.69×10 <sup>5</sup> |
| ADC wav HHH glcm ClusterShade  | MEAN ODSum Haralick IMOC2 F12     | 6.09×10 <sup>-5</sup> | -0.691  | 2.65×10 <sup>5</sup> |
| ADC gldm LDLGLE                | CD150um lbp 2D glrlm RunVariance  | 6.09×10 <sup>-5</sup> | 0.691   | 2.64×10 <sup>5</sup> |
| ADC wav LLH glrlm LRHGLE       | CD200um ngtdm Strength            | 6.09×10 <sup>-5</sup> | 0.691   | 2.63×10 <sup>5</sup> |
| ADC wav LHH glcm ClusterShade  | MEAN ODSum Haralick IMOC2 F12     | 6.09×10 <sup>-5</sup> | -0.691  | 2.62×10 <sup>5</sup> |
| ADC wav HLH gldm LDLGLE        | CD100um lbp 2D glszm ZoneVariance | 6.09×10 <sup>-5</sup> | 0.691   | 2.61×10 <sup>5</sup> |
| ADC wav LHL ngtdm Contrast     | MEAN ODSum Haralick IMOC2 F12     | 6.09×10 <sup>-5</sup> | -0.691  | 2.60×10 <sup>5</sup> |
| ADC wav LHH ngtdm Contrast     | MEAN ODSum Haralick IMOC2 F12     | 6.09×10 <sup>-5</sup> | -0.691  | 2.60×10 <sup>5</sup> |
| ADC wav HLL ngtdm Contrast     | MEAN ODSum Haralick IMOC2 F12     | 6.09×10 <sup>-5</sup> | -0.691  | 2.60×10 <sup>5</sup> |
| ADC wav LHH glszm LALGLE       | CD100um glrlm RunVariance         | 6.09×10 <sup>-5</sup> | 0.691   | 2.59×10 <sup>5</sup> |
| ADC wav LLH ngtdm Contrast     | MEAN ODSum Haralick IMOC2 F12     | 6.09×10 <sup>-5</sup> | -0.691  | 2.59×10 <sup>5</sup> |
| ADC wav LLL ngtdm Contrast     | MEAN ODSum Haralick IMOC2 F12     | 6.09×10 <sup>-5</sup> | -0.691  | 2.59×10 <sup>5</sup> |
| ADC wav HHH ngtdm Contrast     | MEAN ODSum Haralick IMOC2 F12     | 6.09×10 <sup>-5</sup> | -0.691  | 2.59×10 <sup>5</sup> |
| ADC wav HHH glszm LALGLE       | CD100um glrlm RunVariance         | 6.09×10 <sup>-5</sup> | 0.691   | 2.58×10 <sup>5</sup> |
| ADC wav LLH glcm ClusterShade  | MEAN ODSum Haralick IMOC2 F12     | 6.09×10 <sup>-5</sup> | 0.691   | 2.58×10 <sup>5</sup> |
| ADC wav HLH ngtdm Contrast     | MEAN ODSum Haralick IMOC2 F12     | 6.09×10 <sup>-5</sup> | -0.691  | 2.57×10 <sup>5</sup> |
| ADC wav HLH glszm LALGLE       | CD100um glrlm RunVariance         | 6.09×10 <sup>-5</sup> | 0.691   | 2.56×10 <sup>5</sup> |

| Radiomic feature name                  | Pathomic feature name            | $\rho$                | Q-value | BF                 |
|----------------------------------------|----------------------------------|-----------------------|---------|--------------------|
| ADC wav LHL glcm ClusterShade          | MEAN ODSum Haralick IMOC2 F12    | $6.11 \times 10^{-5}$ | 0.69    | $2.52 \times 10^5$ |
| ADC wav HLH glcm ClusterShade          | MEAN ODSum Haralick IMOC2 F12    | $6.11 \times 10^{-5}$ | 0.69    | $2.48 \times 10^5$ |
| ADC wav LHL ngtdm Strength             | MEAN ODSum Haralick ASM F0       | $6.11 \times 10^{-5}$ | 0.69    | $2.45 \times 10^5$ |
| ADC wav LLL ngtdm Busyness             | CD150um lbp 2D glrlm RunVariance | $6.11 \times 10^{-5}$ | 0.69    | $2.43 \times 10^5$ |
| ADC ngtdm Busyness                     | CD100um glrlm RunVariance        | $6.11 \times 10^{-5}$ | 0.69    | $2.42 \times 10^5$ |
| ADC wav LHH gldm LDLGLE                | CD100um glrlm RunVariance        | $6.11 \times 10^{-5}$ | 0.69    | $2.41 \times 10^5$ |
| ADC ngtdm Busyness                     | CD150um lbp 2D glrlm RunVariance | $6.11 \times 10^{-5}$ | 0.69    | $2.39 \times 10^5$ |
| ADC wav HHL glszm ZoneVariance         | CD150um lbp 2D glrlm RunVariance | $6.11 \times 10^{-5}$ | 0.689   | $2.38 \times 10^5$ |
| ADC wav LLL glcm Imc2                  | CD100um glrlm RunVariance        | $6.18 \times 10^{-5}$ | -0.689  | $2.34 \times 10^5$ |
| ADC wav HHL firstorder Mean            | MEAN ODSum Haralick ASM F0       | $6.25 \times 10^{-5}$ | -0.689  | $2.27 \times 10^5$ |
| ADC wav HHL glcm ClusterProminence     | MEAN ODSum Haralick IMOC2 F12    | $6.25 \times 10^{-5}$ | -0.689  | $2.26 \times 10^5$ |
| ADC wav HLH ngtdm Strength             | MEAN ODSum Haralick ASM F0       | $6.25 \times 10^{-5}$ | 0.688   | $2.25 \times 10^5$ |
| ADC wav HLH firstorder RootMeanSquared | MEAN ODSum Haralick ASM F0       | $6.25 \times 10^{-5}$ | 0.688   | $2.21 \times 10^5$ |
| ADC wav LHH glszm LALGLE               | CD150um lbp 2D glrlm RunVariance | $6.25 \times 10^{-5}$ | 0.688   | $2.19 \times 10^5$ |
| ADC wav LHH firstorder Median          | MEAN ODSum Haralick IMOC2 F12    | $6.25 \times 10^{-5}$ | 0.688   | $2.19 \times 10^5$ |
| ADC wav HHH glszm LALGLE               | CD150um lbp 2D glrlm RunVariance | $6.25 \times 10^{-5}$ | 0.688   | $2.18 \times 10^5$ |
| ADC wav HLH glszm LALGLE               | CD150um lbp 2D glrlm RunVariance | $6.25 \times 10^{-5}$ | 0.688   | $2.17 \times 10^5$ |
| ADC wav HHH gldm LDLGLE                | CD100um glrlm RunVariance        | $6.28 \times 10^{-5}$ | 0.688   | $2.13 \times 10^5$ |
| ADC wav LHL firstorder RootMeanSquared | MEAN ODSum Haralick ASM F0       | $6.28 \times 10^{-5}$ | 0.688   | $2.12 \times 10^5$ |
| ADC wav LHL firstorder RootMeanSquared | CD200um ngtdm Strength           | $6.28 \times 10^{-5}$ | 0.687   | $2.10 \times 10^5$ |
| ADC wav HHL ngtdm Busyness             | CD100um glrlm RunVariance        | $6.28 \times 10^{-5}$ | 0.687   | $2.09 \times 10^5$ |
| ADC wav LLL glcm Imc2                  | CD150um lbp 2D glrlm RunVariance | $6.36 \times 10^{-5}$ | -0.687  | $2.05 \times 10^5$ |
| ADC wav HLH gldm LDLGLE                | CD100um glrlm RunVariance        | $6.41 \times 10^{-5}$ | 0.687   | $2.01 \times 10^5$ |
| ADC firstorder 10Percentile            | MEAN ODSum Haralick ASM F0       | $6.41 \times 10^{-5}$ | 0.687   | $2.01 \times 10^5$ |
| ADC wav HHL ngtdm Strength             | MEAN ODSum Haralick ASM F0       | $6.47 \times 10^{-5}$ | 0.686   | $1.97 \times 10^5$ |
| ADC wav LLH gldm LDLGLE                | CD150um lbp 2D glrlm RunVariance | $6.49 \times 10^{-5}$ | 0.686   | $1.95 \times 10^5$ |
| ADC wav LHL firstorder Median          | MEAN ODSum Haralick ASM F0       | $6.49 \times 10^{-5}$ | 0.686   | $1.94 \times 10^5$ |
| ADC wav LLH ngtdm Busyness             | CD150um lbp 2D glrlm RunVariance | $6.56 \times 10^{-5}$ | 0.686   | $1.91 \times 10^5$ |
| ADC wav LHH gldm LDLGLE                | CD150um lbp 2D glrlm RunVariance | $6.57 \times 10^{-5}$ | 0.686   | $1.89 \times 10^5$ |

| Radiomic feature name                  | Pathomic feature name              | p                     | Q-value | BF                   |
|----------------------------------------|------------------------------------|-----------------------|---------|----------------------|
| ADC wav LHL glcm DifferenceVariance    | MEAN ODSum Haralick IMOC2 F12      | 6.60×10 <sup>-5</sup> | -0.685  | 1.87×10 <sup>5</sup> |
| ADC wav LLH glcm ClusterProminence     | MEAN ODSum Haralick IMOC2 F12      | 6.63×10 <sup>-5</sup> | -0.685  | 1.85×10 <sup>5</sup> |
| ADC wav LLL ngtdm Busyness             | CD100um lbp 2D glszm ZoneVariance  | 7.01×10 <sup>-5</sup> | 0.684   | 1.74×10 <sup>5</sup> |
| ADC wav HLL firstorder Median          | MEAN ODSum Haralick IMOC2 F12      | 7.11×10 <sup>-5</sup> | -0.684  | 1.70×10 <sup>5</sup> |
| ADC wav HHL ngtdm Busyness             | CD150um lbp 2D glrlm RunVariance   | 7.11×10 <sup>-5</sup> | 0.684   | 1.69×10 <sup>5</sup> |
| ADC wav LHL firstorder Median          | MEAN ODSum Haralick IMOC2 F12      | 7.38×10 <sup>-5</sup> | -0.683  | 1.61×10 <sup>5</sup> |
| ADC wav HLL glszm ZoneVariance         | CD100um lbp 2D glszm ZoneVariance  | 7.38×10 <sup>-5</sup> | 0.683   | 1.60×10 <sup>5</sup> |
| ADC wav LHL ngtdm Busyness             | CD150um lbp 2D glrlm RunVariance   | 7.38×10 <sup>-5</sup> | 0.683   | 1.59×10 <sup>5</sup> |
| ADC wav LHH firstorder Mean            | MEAN ODSum Haralick IMOC2 F12      | 7.38×10 <sup>-5</sup> | 0.683   | 1.58×10 <sup>5</sup> |
| ADC wav LLH firstorder RootMeanSquared | CD200um ngtdm Strength             | 7.38×10 <sup>-5</sup> | 0.682   | 1.56×10 <sup>5</sup> |
| ADC wav LHL firstorder Mean            | MEAN ODSum Haralick ASM F0         | 7.38×10 <sup>-5</sup> | 0.682   | 1.56×10 <sup>5</sup> |
| ADC wav HLL ngtdm Busyness             | CD100um lbp 2D glszm ZoneVariance  | 7.38×10 <sup>-5</sup> | 0.682   | 1.55×10 <sup>5</sup> |
| ADC wav HLL glszm ZoneVariance         | CD150um lbp 2D glrlm RunVariance   | 7.38×10 <sup>-5</sup> | 0.682   | 1.55×10 <sup>5</sup> |
| ADC wav LLH glrlm LRHGLE               | MEAN ODSum Haralick ASM F0         | 7.47×10 <sup>-5</sup> | 0.682   | 1.52×10 <sup>5</sup> |
| ADC wav HLH gldm LDLGLE                | CD150um lbp 2D glrlm RunVariance   | 7.50×10 <sup>-5</sup> | 0.682   | 1.50×10 <sup>5</sup> |
| ADC wav HLL glszm ZoneVariance         | CD100um glrlm RunVariance          | 7.55×10 <sup>-5</sup> | 0.681   | 1.48×10 <sup>5</sup> |
| ADC wav HHH gldm LDLGLE                | CD150um lbp 2D glrlm RunVariance   | 7.55×10 <sup>-5</sup> | 0.681   | 1.48×10 <sup>5</sup> |
| ADC wav LHL ngtdm Strength             | CD200um ngtdm Strength             | 7.60×10 <sup>-5</sup> | 0.681   | 1.46×10 <sup>5</sup> |
| ADC wav HLL firstorder Mean            | MEAN ODSum Haralick ASM F0         | 7.62×10 <sup>-5</sup> | 0.681   | 1.45×10 <sup>5</sup> |
| ADC wav LLL ngtdm Busyness             | CD100um glrlm RunVariance          | 7.65×10 <sup>-5</sup> | 0.681   | 1.43×10 <sup>5</sup> |
| ADC wav LHL gldm LDLGLE                | CD100um lbp 2D glszm ZoneVariance  | 7.80×10 <sup>-5</sup> | 0.68    | 1.40×10 <sup>5</sup> |
| ADC wav LHH firstorder RootMeanSquared | MEAN ODSum Haralick IMOC2 F12      | 7.99×10 <sup>-5</sup> | -0.68   | 1.36×10 <sup>5</sup> |
| ADC glcm Imc2                          | CD100um lbp 2D glszm ZoneVariance  | 8.02×10 <sup>-5</sup> | -0.68   | 1.34×10 <sup>5</sup> |
| ADC lbp 3D m2 glrlm SRHGLE             | CD200um wav LL firstorder Kurtosis | 8.04×10 <sup>-5</sup> | -0.679  | 1.33×10 <sup>5</sup> |
| ADC wav LLH glcm MaximumProbability    | CD100um lbp 2D glszm ZoneVariance  | 8.10×10 <sup>-5</sup> | 0.679   | 1.31×10 <sup>5</sup> |
| ADC wav HHH glrlm LRHGLE               | MEAN ODSum Haralick ASM F0         | 8.38×10 <sup>-5</sup> | 0.679   | 1.26×10 <sup>5</sup> |
| ADC wav LHH glcm MaximumProbability    | CD100um lbp 2D glszm ZoneVariance  | 8.38×10 <sup>-5</sup> | 0.678   | 1.26×10 <sup>5</sup> |
| ADC wav LHL firstorder Mean            | MEAN ODSum Haralick IMOC2 F12      | 8.58×10 <sup>-5</sup> | -0.678  | 1.22×10 <sup>5</sup> |
| ADC wav HLH glcm ClusterShade          | MEAN ODSum Haralick ASM F0         | 8.70×10 <sup>-5</sup> | -0.678  | 1.20×10 <sup>5</sup> |
| ADC wav LHL ngtdm Busyness             | CD100um lbp 2D glszm ZoneVariance  | 8.95×10 <sup>-5</sup> | 0.677   | 1.16×10 <sup>5</sup> |
| ADC wav HHL ngtdm Strength             | CD200um ngtdm Strength             | 9.36×10 <sup>-5</sup> | 0.676   | 1.10×10 <sup>5</sup> |

| Radiomic feature name                  | Pathomic feature name                 | $\rho$                | Q-value | BF                 |
|----------------------------------------|---------------------------------------|-----------------------|---------|--------------------|
| ADC firstorder Median                  | MEAN ODSum Haralick ASM F0            | $9.44 \times 10^{-5}$ | 0.676   | $1.09 \times 10^5$ |
| ADC wav LHH glcm MaximumProbability    | CD100um glrlm RunVariance             | $9.68 \times 10^{-5}$ | 0.675   | $1.05 \times 10^5$ |
| ADC glcm Imc2                          | CD100um glrlm RunVariance             | $9.68 \times 10^{-5}$ | -0.675  | $1.05 \times 10^5$ |
| ADC wav LHH ngtdm Strength             | MEAN ODSum Haralick IMOC2 F12         | $9.69 \times 10^{-5}$ | -0.675  | $1.04 \times 10^5$ |
| ADC wav LHL gldm LDLGLE                | CD100um glrlm RunVariance             | $9.90 \times 10^{-5}$ | 0.675   | $1.02 \times 10^5$ |
| ADC lbp 3D m2 glszm SAHGLE             | CD200um wav LL firstorder Kurtosis    | $1.01 \times 10^{-4}$ | -0.674  | $9.93 \times 10^4$ |
| ADC wav HHH ngtdm Strength             | MEAN ODSum Haralick IMOC2 F12         | $1.01 \times 10^{-4}$ | -0.674  | $9.89 \times 10^4$ |
| ADC wav HLL ngtdm Busyness             | CD100um glrlm RunVariance             | $1.02 \times 10^{-4}$ | 0.674   | $9.73 \times 10^4$ |
| ADC wav LLH glcm MaximumProbability    | CD100um glrlm RunVariance             | $1.02 \times 10^{-4}$ | 0.674   | $9.71 \times 10^4$ |
| ADC wav LLH firstorder 10Percentile    | CD200um ngtdm Strength                | $1.02 \times 10^{-4}$ | -0.674  | $9.64 \times 10^4$ |
| ADC wav LHL ngtdm Busyness             | CD100um glrlm RunVariance             | $1.03 \times 10^{-4}$ | 0.673   | $9.44 \times 10^4$ |
| ADC wav HHH firstorder RootMeanSquared | MEAN ODSum Haralick IMOC2 F12         | $1.04 \times 10^{-4}$ | -0.673  | $9.37 \times 10^4$ |
| ADC glcm Imc2                          | CD150um lbp 2D glrlm RunVariance      | $1.04 \times 10^{-4}$ | -0.673  | $9.28 \times 10^4$ |
| ADC wav HLL ngtdm Busyness             | CD150um lbp 2D glrlm RunVariance      | $1.04 \times 10^{-4}$ | 0.673   | $9.25 \times 10^4$ |
| ADC wav LLH glcm MaximumProbability    | CD150um lbp 2D glrlm RunVariance      | $1.11 \times 10^{-4}$ | 0.672   | $8.65 \times 10^4$ |
| ADC lbp 3D m2 glszm HGLZE              | CD200um wav LL firstorder Kurtosis    | $1.24 \times 10^{-4}$ | -0.67   | $7.71 \times 10^4$ |
| ADC wav LHL gldm LDLGLE                | CD150um lbp 2D glrlm RunVariance      | $1.25 \times 10^{-4}$ | 0.67    | $7.64 \times 10^4$ |
| ADC wav HLL firstorder Mean            | MEAN ODSum Haralick IMOC2 F12         | $1.29 \times 10^{-4}$ | -0.669  | $7.35 \times 10^4$ |
| ADC wav LLH firstorder 10Percentile    | MEAN ODSum Haralick ASM F0            | $1.38 \times 10^{-4}$ | -0.668  | $6.87 \times 10^4$ |
| ADC wav HHL firstorder Mean            | MEAN ODSum Haralick IMOC2 F12         | $1.49 \times 10^{-4}$ | 0.666   | $6.34 \times 10^4$ |
| ADC wav LLH firstorder Median          | MEAN ODSum Haralick ASM F0            | $1.63 \times 10^{-4}$ | 0.664   | $5.78 \times 10^4$ |
| ADC wav LLH firstorder RootMeanSquared | MEAN ODSum Haralick ASM F0            | $1.69 \times 10^{-4}$ | 0.664   | $5.56 \times 10^4$ |
| ADC wav HLH glszm GrayLevelVariance    | MEAN ODSum Haralick IMOC2 F12         | $1.78 \times 10^{-4}$ | -0.663  | $5.28 \times 10^4$ |
| ADC wav LLL glszm ZoneVariance         | CD150um lbp 2D glrlm RunVariance      | $1.78 \times 10^{-4}$ | 0.663   | $5.25 \times 10^4$ |
| ADC wav LLH firstorder Mean            | CD200um ngtdm Strength                | $1.86 \times 10^{-4}$ | 0.662   | $5.00 \times 10^4$ |
| ADC wav LLH glszm LAHGLE               | MEAN ODSum Haralick ASM F0            | $1.92 \times 10^{-4}$ | 0.661   | $4.82 \times 10^4$ |
| ADC gldm DependenceVariance            | CD150um lbp 2D glrlm RunVariance      | $1.92 \times 10^{-4}$ | 0.661   | $4.81 \times 10^4$ |
| ADC wav HLH ngtdm Complexity           | CD150um wav HH glcm ClusterProminence | $1.93 \times 10^{-4}$ | 0.661   | $4.77 \times 10^4$ |
| ADC firstorder TotalEnergy             | CD200um wav HL glcm ClusterProminence | $1.93 \times 10^{-4}$ | 0.661   | $4.74 \times 10^4$ |

| Radiomic feature name               | Pathomic feature name              | p                     | Q-value | BF                   |
|-------------------------------------|------------------------------------|-----------------------|---------|----------------------|
| ADC wav LHH glcm MaximumProbability | CD150um lbp 2D glrlm RunVariance   | 1.94×10 <sup>-4</sup> | 0.66    | 4.68×10 <sup>4</sup> |
| ADC wav LLH ngtdm Strength          | MEAN ODSum Haralick IMOC2 F12      | 2.06×10 <sup>-4</sup> | -0.659  | 4.40×10 <sup>4</sup> |
| ADC wav LHL gldm LDHGLE             | MEAN ODSum Haralick IMOC2 F12      | 2.12×10 <sup>-4</sup> | -0.659  | 4.26×10 <sup>4</sup> |
| ADC wav LHH firstorder Maximum      | CD200um ngtdm Strength             | 2.27×10 <sup>-4</sup> | 0.657   | 3.98×10 <sup>4</sup> |
| ADC lbp 3D k firstorder Minimum     | CD100um ngtdm Strength             | 2.50×10 <sup>-4</sup> | 0.655   | 3.61×10 <sup>4</sup> |
| ADC gldm DependenceVariance         | CD100um lbp 2D glszm ZoneVariance  | 2.50×10 <sup>-4</sup> | 0.655   | 3.60×10 <sup>4</sup> |
| ADC gldm DependenceVariance         | CD100um glrlm RunVariance          | 2.52×10 <sup>-4</sup> | 0.655   | 3.55×10 <sup>4</sup> |
| ADC wav HLH gldm LDLGLE             | CD150um glszm LALGLE               | 2.53×10 <sup>-4</sup> | 0.655   | 3.52×10 <sup>4</sup> |
| ADC wav LLH gldm LDLGLE             | CD150um glszm LALGLE               | 2.55×10 <sup>-4</sup> | 0.655   | 3.47×10 <sup>4</sup> |
| ADC wav HLH ngtdm Strength          | MEAN ODSum Haralick IMOC2 F12      | 2.66×10 <sup>-4</sup> | -0.654  | 3.32×10 <sup>4</sup> |
| ADC wav LLL glszm ZoneVariance      | CD100um lbp 2D glszm ZoneVariance  | 2.67×10 <sup>-4</sup> | 0.654   | 3.28×10 <sup>4</sup> |
| ADC wav HLL ngtdm Complexity        | CD200um wav HH ngtdm Complexity    | 2.67×10 <sup>-4</sup> | 0.654   | 3.27×10 <sup>4</sup> |
| ADC firstorder Minimum              | MEAN ODSum Haralick IMOC2 F12      | 2.67×10 <sup>-4</sup> | -0.654  | 3.27×10 <sup>4</sup> |
| ADC gldm LDLGLE                     | CD150um glszm LALGLE               | 2.76×10 <sup>-4</sup> | 0.653   | 3.14×10 <sup>4</sup> |
| ADC wav HHH gldm LDLGLE             | CD150um glszm LALGLE               | 2.76×10 <sup>-4</sup> | 0.653   | 3.13×10 <sup>4</sup> |
| ADC wav LLH firstorder 90Percentile | CD200um ngtdm Strength             | 2.77×10 <sup>-4</sup> | 0.653   | 3.11×10 <sup>4</sup> |
| ADC lbp 3D m2 glcm JointAverage     | CD200um wav LL firstorder Kurtosis | 2.77×10 <sup>-4</sup> | -0.652  | 3.10×10 <sup>4</sup> |
| ADC wav LHH gldm LDLGLE             | CD150um glszm LALGLE               | 2.78×10 <sup>-4</sup> | 0.652   | 3.07×10 <sup>4</sup> |
| ADC wav LLH ngtdm Busyness          | CD150um glszm LALGLE               | 2.83×10 <sup>-4</sup> | 0.652   | 3.00×10 <sup>4</sup> |
| ADC wav HHL glszm ZoneVariance      | CD150um glszm LALGLE               | 2.98×10 <sup>-4</sup> | 0.651   | 2.85×10 <sup>4</sup> |
| ADC wav LLH glcm MaximumProbability | CD150um glszm LALGLE               | 2.99×10 <sup>-4</sup> | 0.651   | 2.82×10 <sup>4</sup> |
| ADC wav HLH glszm LALGLE            | CD150um glszm LALGLE               | 3.00×10 <sup>-4</sup> | 0.65    | 2.80×10 <sup>4</sup> |
| ADC wav LHH glszm LALGLE            | CD150um glszm LALGLE               | 3.01×10 <sup>-4</sup> | 0.65    | 2.78×10 <sup>4</sup> |
| ADC wav HHH glszm LALGLE            | CD150um glszm LALGLE               | 3.01×10 <sup>-4</sup> | 0.65    | 2.77×10 <sup>4</sup> |
| ADC wav LLH gldm LDHGLE             | CD200um ngtdm Strength             | 3.05×10 <sup>-4</sup> | 0.65    | 2.71×10 <sup>4</sup> |
| ADC wav HHL ngtdm Strength          | MEAN ODSum Haralick IMOC2 F12      | 3.05×10 <sup>-4</sup> | -0.65   | 2.71×10 <sup>4</sup> |
| ADC wav LLH gldm SDLGLE             | MEAN ODSum Haralick IMOC2 F12      | 3.09×10 <sup>-4</sup> | -0.65   | 2.67×10 <sup>4</sup> |
| ADC wav HHH glrlm SRLGLE            | CD100um lbp 2D glszm ZoneVariance  | 3.22×10 <sup>-4</sup> | 0.649   | 2.55×10 <sup>4</sup> |
| ADC wav LLH gldm LDHGLE             | MEAN ODSum Haralick ASM F0         | 3.24×10 <sup>-4</sup> | 0.648   | 2.53×10 <sup>4</sup> |
| ADC ngtdm Busyness                  | CD150um glszm LALGLE               | 3.27×10 <sup>-4</sup> | 0.648   | 2.48×10 <sup>4</sup> |
| ADC wav HLL firstorder Uniformity   | CD100um glrlm RunVariance          | 3.27×10 <sup>-4</sup> | 0.648   | 2.48×10 <sup>4</sup> |

| Radiomic feature name                  | Pathomic feature name                 | $\rho$                | Q-value | BF                 |
|----------------------------------------|---------------------------------------|-----------------------|---------|--------------------|
| ADC wav LLL glszm ZoneVariance         | CD100um glrlm RunVariance             | $3.27 \times 10^{-4}$ | 0.648   | $2.47 \times 10^4$ |
| ADC wav LLL firstorder Minimum         | MEAN ODSum Haralick IMOC2 F12         | $3.27 \times 10^{-4}$ | -0.648  | $2.46 \times 10^4$ |
| ADC wav LHL glcm Idm                   | CD100um lbp 2D glszm ZoneVariance     | $3.27 \times 10^{-4}$ | 0.648   | $2.45 \times 10^4$ |
| ADC wav HLL firstorder Uniformity      | CD100um lbp 2D glszm ZoneVariance     | $3.27 \times 10^{-4}$ | 0.648   | $2.45 \times 10^4$ |
| ADC wav LHL gldm LDLGLE                | CD150um glszm LALGLE                  | $3.36 \times 10^{-4}$ | 0.647   | $2.37 \times 10^4$ |
| ADC wav LLL glcm Imc2                  | CD150um glszm LALGLE                  | $3.37 \times 10^{-4}$ | -0.647  | $2.35 \times 10^4$ |
| ADC wav HLL gldm LDLGLE                | CD150um lbp 2D glrlm RunVariance      | $3.55 \times 10^{-4}$ | 0.646   | $2.23 \times 10^4$ |
| ADC wav LHH firstorder Mean            | CD100um ngtdm Strength                | $3.61 \times 10^{-4}$ | -0.646  | $2.19 \times 10^4$ |
| ADC wav HLL ngtdm Busyness             | CD150um glszm LALGLE                  | $3.62 \times 10^{-4}$ | 0.645   | $2.17 \times 10^4$ |
| ADC wav LHL firstorder RootMeanSquared | MEAN ODSum Haralick IMOC2 F12         | $3.64 \times 10^{-4}$ | -0.645  | $2.15 \times 10^4$ |
| ADC wav HHL ngtdm Busyness             | CD150um glszm LALGLE                  | $3.66 \times 10^{-4}$ | 0.645   | $2.13 \times 10^4$ |
| ADC wav HLH gldm SDLGLE                | MEAN ODSum Haralick IMOC2 F12         | $3.76 \times 10^{-4}$ | -0.644  | $2.07 \times 10^4$ |
| ADC wav HHH firstorder Median          | MEAN ODSum Haralick ASM F0            | $3.91 \times 10^{-4}$ | 0.644   | $1.99 \times 10^4$ |
| ADC wav LHH glcm MaximumProbability    | CD150um glszm LALGLE                  | $3.95 \times 10^{-4}$ | 0.643   | $1.96 \times 10^4$ |
| ADC wav LHL glcm Idm                   | CD100um glrlm RunVariance             | $3.95 \times 10^{-4}$ | 0.643   | $1.95 \times 10^4$ |
| ADC wav LLH glszm LAHGLE               | CD200um ngtdm Strength                | $4.01 \times 10^{-4}$ | 0.643   | $1.92 \times 10^4$ |
| ADC wav HLL firstorder TotalEnergy     | CD200um wav HL glcm ClusterProminence | $4.15 \times 10^{-4}$ | 0.642   | $1.85 \times 10^4$ |
| ADC wav LHL ngtdm Strength             | MEAN ODSum Haralick IMOC2 F12         | $4.28 \times 10^{-4}$ | -0.642  | $1.79 \times 10^4$ |
| ADC wav HLL firstorder Uniformity      | CD150um glszm LALGLE                  | $4.44 \times 10^{-4}$ | 0.641   | $1.72 \times 10^4$ |
| ADC wav LHL ngtdm Busyness             | CD150um glszm LALGLE                  | $4.44 \times 10^{-4}$ | 0.641   | $1.71 \times 10^4$ |
| ADC wav LLL ngtdm Busyness             | CD150um glszm LALGLE                  | $4.45 \times 10^{-4}$ | 0.64    | $1.70 \times 10^4$ |
| ADC wav HHH glrlm SRLGLE               | CD100um glrlm RunVariance             | $4.45 \times 10^{-4}$ | 0.64    | $1.69 \times 10^4$ |
| ADC wav HHH firstorder Mean            | MEAN ODSum Haralick ASM F0            | $4.45 \times 10^{-4}$ | -0.64   | $1.69 \times 10^4$ |
| ADC wav HLH firstorder RootMeanSquared | MEAN ODSum Haralick IMOC2 F12         | $4.58 \times 10^{-4}$ | -0.64   | $1.64 \times 10^4$ |
| ADC wav HHH firstorder Maximum         | CD200um ngtdm Strength                | $4.60 \times 10^{-4}$ | 0.64    | $1.62 \times 10^4$ |
| ADC wav HLL gldm LDHGLE                | CD200um wav HL glcm ClusterProminence | $4.62 \times 10^{-4}$ | 0.639   | $1.61 \times 10^4$ |
| ADC wav HHH glrlm SRLGLE               | CD150um glszm LALGLE                  | $4.69 \times 10^{-4}$ | 0.639   | $1.58 \times 10^4$ |
| ADC wav HLL glszm ZoneVariance         | CD150um glszm LALGLE                  | $4.81 \times 10^{-4}$ | 0.638   | $1.54 \times 10^4$ |
| ADC wav LHL gldm DependenceVariance    | CD100um lbp 2D glszm ZoneVariance     | $4.88 \times 10^{-4}$ | 0.638   | $1.51 \times 10^4$ |



| Radiomic feature name               | Pathomic feature name                        | $\rho$                | Q-value | BF                 |
|-------------------------------------|----------------------------------------------|-----------------------|---------|--------------------|
| ADC wav LLH firstorder 90Percentile | MEAN ODSum Haralick ASM F0                   | $4.91 \times 10^{-4}$ | 0.638   | $1.50 \times 10^4$ |
| ADC wav HHH glrlm LRHGLE            | MEAN ODSum Haralick IMOC2 F12                | $5.27 \times 10^{-4}$ | -0.636  | $1.39 \times 10^4$ |
| ADC wav HHH firstorder Mean         | MEAN ODSum Haralick IMOC2 F12                | $5.44 \times 10^{-4}$ | 0.636   | $1.35 \times 10^4$ |
| ADC wav HLL glcm ClusterProminence  | CD200um wav HH firstorder InterquartileRange | $5.51 \times 10^{-4}$ | 0.635   | $1.33 \times 10^4$ |
| ADC wav HLL firstorder Uniformity   | CD150um lbp 2D glrlm RunVariance             | $5.55 \times 10^{-4}$ | 0.635   | $1.31 \times 10^4$ |
| ADC wav LLH firstorder Median       | MEAN ODSum Haralick IMOC2 F12                | $5.58 \times 10^{-4}$ | -0.635  | $1.30 \times 10^4$ |
| ADC firstorder 10Percentile         | CD100um ngtdm Strength                       | $5.72 \times 10^{-4}$ | 0.634   | $1.27 \times 10^4$ |
| ADC wav LLL gldm LDHGLE             | CD150um wav HH glcm ClusterProminence        | $5.93 \times 10^{-4}$ | 0.634   | $1.22 \times 10^4$ |
| ADC wav LLH gldm DependenceVariance | CD100um lbp 2D glszm ZoneVariance            | $6.00 \times 10^{-4}$ | 0.633   | $1.20 \times 10^4$ |
| ADC wav LHH firstorder Maximum      | MEAN ODSum Haralick ASM F0                   | $6.00 \times 10^{-4}$ | 0.633   | $1.20 \times 10^4$ |
| ADC wav HHL firstorder Mean         | CD100um ngtdm Strength                       | $6.13 \times 10^{-4}$ | -0.633  | $1.17 \times 10^4$ |
| ADC wav LHL gldm DependenceVariance | CD100um glrlm RunVariance                    | $6.85 \times 10^{-4}$ | 0.63    | $1.05 \times 10^4$ |
| ADC wav HLL gldm LDLGLE             | CD100um glrlm RunVariance                    | $6.97 \times 10^{-4}$ | 0.63    | $1.03 \times 10^4$ |
| ADC glcm Imc2                       | CD150um glszm LALGLE                         | $7.06 \times 10^{-4}$ | -0.63   | $1.01 \times 10^4$ |
| ADC wav HHH glcm MaximumProbability | CD100um glrlm RunVariance                    | $7.06 \times 10^{-4}$ | 0.63    | $1.01 \times 10^4$ |
| ADC wav LLH gldm DependenceVariance | CD150um lbp 2D glrlm RunVariance             | $7.10 \times 10^{-4}$ | 0.629   | $9.98 \times 10^3$ |
| ADC wav LLH gldm DependenceVariance | CD100um glrlm RunVariance                    | $7.11 \times 10^{-4}$ | 0.629   | $9.93 \times 10^3$ |
| ADC glszm GLNUN                     | CD100um lbp 2D glszm ZoneVariance            | $7.11 \times 10^{-4}$ | 0.629   | $9.90 \times 10^3$ |
| ADC wav HLL gldm LDLGLE             | CD100um lbp 2D glszm ZoneVariance            | $7.21 \times 10^{-4}$ | 0.629   | $9.73 \times 10^3$ |
| ADC wav HHH firstorder Median       | MEAN ODSum Haralick IMOC2 F12                | $7.24 \times 10^{-4}$ | -0.629  | $9.66 \times 10^3$ |
| ADC firstorder Minimum              | CD100um ngtdm Strength                       | $7.34 \times 10^{-4}$ | 0.628   | $9.50 \times 10^3$ |
| ADC wav HHH glcm MaximumProbability | CD100um lbp 2D glszm ZoneVariance            | $7.45 \times 10^{-4}$ | 0.628   | $9.33 \times 10^3$ |
| ADC firstorder 10Percentile         | MEAN ODSum Haralick IMOC2 F12                | $7.45 \times 10^{-4}$ | -0.628  | $9.29 \times 10^3$ |
| ADC wav HHH glrlm SRLGLE            | CD150um lbp 2D glrlm RunVariance             | $7.45 \times 10^{-4}$ | 0.628   | $9.27 \times 10^3$ |
| ADC glszm GLNUN                     | CD100um glrlm RunVariance                    | $7.58 \times 10^{-4}$ | 0.627   | $9.10 \times 10^3$ |
| ADC wav LLH glcm ClusterProminence  | CD100um ngtdm Strength                       | $7.79 \times 10^{-4}$ | 0.627   | $8.83 \times 10^3$ |
| ADC wav LLH firstorder 10Percentile | MEAN ODSum Haralick IMOC2 F12                | $8.17 \times 10^{-4}$ | 0.626   | $8.41 \times 10^3$ |
| ADC wav HLL glcm ClusterProminence  | CD200um wav HH ngtdm Complexity              | $8.34 \times 10^{-4}$ | 0.625   | $8.22 \times 10^3$ |
| ADC wav LHH firstorder Median       | CD100um ngtdm Strength                       | $8.55 \times 10^{-4}$ | -0.625  | $8.00 \times 10^3$ |
| ADC wav LLL firstorder Minimum      | CD100um ngtdm Strength                       | $8.82 \times 10^{-4}$ | 0.624   | $7.74 \times 10^3$ |
| ADC wav LLH glrlm LRHGLE            | MEAN ODSum Haralick IMOC2 F12                | $9.15 \times 10^{-4}$ | -0.623  | $7.43 \times 10^3$ |

| Radiomic feature name                  | Pathomic feature name                        | $\rho$                | Q-value | BF                 |
|----------------------------------------|----------------------------------------------|-----------------------|---------|--------------------|
| ADC wav HLH ngtdm Complexity           | CD200um wav HL glcm ClusterProminence        | $9.15 \times 10^{-4}$ | 0.623   | $7.42 \times 10^3$ |
| ADC wav HLL glcm ClusterShade          | CD200um wav HH ngtdm Complexity              | $9.17 \times 10^{-4}$ | -0.623  | $7.38 \times 10^3$ |
| ADC wav HHL glcm ClusterProminence     | CD100um ngtdm Strength                       | $9.40 \times 10^{-4}$ | 0.622   | $7.19 \times 10^3$ |
| ADC wav LLH firstorder Median          | CD100um ngtdm Strength                       | $9.41 \times 10^{-4}$ | 0.622   | $7.16 \times 10^3$ |
| ADC wav LHL glcm ClusterShade          | CD100um ngtdm Strength                       | $9.46 \times 10^{-4}$ | -0.622  | $7.10 \times 10^3$ |
| ADC glszm GLNUN                        | CD150um glszm LALGLE                         | $9.59 \times 10^{-4}$ | 0.622   | $6.98 \times 10^3$ |
| ADC wav LHL firstorder Mean            | CD100um ngtdm Strength                       | $9.87 \times 10^{-4}$ | 0.621   | $6.74 \times 10^3$ |
| ADC wav LLH ngtdm Contrast             | CD100um ngtdm Strength                       | $9.87 \times 10^{-4}$ | 0.621   | $6.69 \times 10^3$ |
| ADC wav LHH ngtdm Contrast             | CD100um ngtdm Strength                       | $9.87 \times 10^{-4}$ | 0.621   | $6.68 \times 10^3$ |
| ADC wav LHL ngtdm Contrast             | CD100um ngtdm Strength                       | $9.87 \times 10^{-4}$ | 0.621   | $6.68 \times 10^3$ |
| ADC wav HHH ngtdm Contrast             | CD100um ngtdm Strength                       | $9.87 \times 10^{-4}$ | 0.621   | $6.67 \times 10^3$ |
| ADC wav HLH ngtdm Contrast             | CD100um ngtdm Strength                       | $9.87 \times 10^{-4}$ | 0.621   | $6.66 \times 10^3$ |
| ADC wav LLL ngtdm Contrast             | CD100um ngtdm Strength                       | $9.87 \times 10^{-4}$ | 0.621   | $6.64 \times 10^3$ |
| ADC wav LHH glcm ClusterShade          | CD100um ngtdm Strength                       | $1.00 \times 10^{-3}$ | 0.62    | $6.54 \times 10^3$ |
| ADC wav HLL ngtdm Contrast             | CD100um ngtdm Strength                       | $1.01 \times 10^{-3}$ | 0.62    | $6.48 \times 10^3$ |
| ADC wav HLL ngtdm Complexity           | CD200um wav HH firstorder InterquartileRange | $1.02 \times 10^{-3}$ | 0.62    | $6.38 \times 10^3$ |
| ADC wav HHH glcm ClusterShade          | CD100um ngtdm Strength                       | $1.02 \times 10^{-3}$ | 0.62    | $6.37 \times 10^3$ |
| ADC wav LHL glcm DifferenceVariance    | CD100um ngtdm Strength                       | $1.03 \times 10^{-3}$ | 0.619   | $6.25 \times 10^3$ |
| ADC wav LLH glcm ClusterShade          | CD100um ngtdm Strength                       | $1.04 \times 10^{-3}$ | -0.619  | $6.20 \times 10^3$ |
| ADC wav LLL glcm InverseVariance       | CD100um lbp 2D glszm ZoneVariance            | $1.05 \times 10^{-3}$ | 0.619   | $6.14 \times 10^3$ |
| ADC wav LHL firstorder Median          | CD100um ngtdm Strength                       | $1.07 \times 10^{-3}$ | 0.618   | $6.01 \times 10^3$ |
| ADC wav LHL gldm DependenceVariance    | CD150um lbp 2D glrlm RunVariance             | $1.11 \times 10^{-3}$ | 0.618   | $5.79 \times 10^3$ |
| ADC glszm GLNUN                        | CD150um lbp 2D glrlm RunVariance             | $1.15 \times 10^{-3}$ | 0.617   | $5.58 \times 10^3$ |
| ADC wav HHH firstorder RootMeanSquared | CD100um ngtdm Strength                       | $1.15 \times 10^{-3}$ | 0.617   | $5.54 \times 10^3$ |
| ADC wav LHH firstorder RootMeanSquared | CD100um ngtdm Strength                       | $1.17 \times 10^{-3}$ | 0.616   | $5.43 \times 10^3$ |
| ADC wav LHL firstorder Maximum         | MEAN ODSum Haralick ASM F0                   | $1.19 \times 10^{-3}$ | 0.616   | $5.33 \times 10^3$ |
| ADC wav HLH glszm GrayLevelVariance    | CD100um ngtdm Strength                       | $1.19 \times 10^{-3}$ | 0.616   | $5.32 \times 10^3$ |
| ADC wav HHL glcm InverseVariance       | CD100um lbp 2D glszm ZoneVariance            | $1.19 \times 10^{-3}$ | 0.616   | $5.29 \times 10^3$ |
| ADC wav HLL firstorder Mean            | CD100um ngtdm Strength                       | $1.19 \times 10^{-3}$ | 0.616   | $5.28 \times 10^3$ |

| Radiomic feature name                  | Pathomic feature name                        | $\rho$                | Q-value | BF                 |
|----------------------------------------|----------------------------------------------|-----------------------|---------|--------------------|
| ADC wav HLL gldm LDLGLE                | CD150um glszm LALGLE                         | $1.19 \times 10^{-3}$ | 0.615   | $5.26 \times 10^3$ |
| ADC wav HHL glcm InverseVariance       | CD100um glrlm RunVariance                    | $1.23 \times 10^{-3}$ | 0.615   | $5.12 \times 10^3$ |
| ADC wav HHH firstorder Median          | CD100um ngtdm Strength                       | $1.26 \times 10^{-3}$ | 0.614   | $4.95 \times 10^3$ |
| ADC lbp 3D m2 glrlm LRHGLE             | CD200um wav LL firstorder Kurtosis           | $1.26 \times 10^{-3}$ | -0.614  | $4.94 \times 10^3$ |
| ADC wav HLL glcm InverseVariance       | CD100um lbp 2D glszm ZoneVariance            | $1.28 \times 10^{-3}$ | 0.614   | $4.86 \times 10^3$ |
| ADC glcm InverseVariance               | CD100um lbp 2D glszm ZoneVariance            | $1.28 \times 10^{-3}$ | 0.614   | $4.83 \times 10^3$ |
| ADC firstorder Median                  | CD100um ngtdm Strength                       | $1.28 \times 10^{-3}$ | 0.613   | $4.83 \times 10^3$ |
| ADC wav HLL glcm InverseVariance       | CD100um glrlm RunVariance                    | $1.32 \times 10^{-3}$ | 0.613   | $4.68 \times 10^3$ |
| ADC wav LHH ngtdm Strength             | CD100um ngtdm Strength                       | $1.35 \times 10^{-3}$ | 0.612   | $4.58 \times 10^3$ |
| ADC wav LLL glcm InverseVariance       | CD100um glrlm RunVariance                    | $1.43 \times 10^{-3}$ | 0.611   | $4.31 \times 10^3$ |
| ADC wav LHL glszm SALGLE               | MEAN ODSum Haralick IMOC2 F12                | $1.43 \times 10^{-3}$ | -0.611  | $4.29 \times 10^3$ |
| ADC gldm DependenceVariance            | CD150um glszm LALGLE                         | $1.49 \times 10^{-3}$ | 0.61    | $4.11 \times 10^3$ |
| ADC wav HHH glcm MaximumProbability    | CD150um lbp 2D glrlm RunVariance             | $1.52 \times 10^{-3}$ | 0.609   | $4.03 \times 10^3$ |
| ADC wav LHL glcm Idm                   | CD150um glszm LALGLE                         | $1.54 \times 10^{-3}$ | 0.609   | $3.98 \times 10^3$ |
| ADC glcm InverseVariance               | CD100um glrlm RunVariance                    | $1.55 \times 10^{-3}$ | 0.609   | $3.94 \times 10^3$ |
| ADC wav HHH ngtdm Strength             | CD100um ngtdm Strength                       | $1.57 \times 10^{-3}$ | 0.608   | $3.87 \times 10^3$ |
| ADC wav LLL glszm ZoneVariance         | CD150um glszm LALGLE                         | $1.60 \times 10^{-3}$ | 0.608   | $3.80 \times 10^3$ |
| ADC firstorder TotalEnergy             | CD200um wav HH firstorder InterquartileRange | $1.61 \times 10^{-3}$ | 0.608   | $3.76 \times 10^3$ |
| ADC lbp 3D m2 gldm SDLGLE              | MEAN ODSum Haralick IMOC2 F12                | $1.69 \times 10^{-3}$ | -0.607  | $3.59 \times 10^3$ |
| ADC wav LHL glcm Idm                   | CD150um lbp 2D glrlm RunVariance             | $1.73 \times 10^{-3}$ | 0.606   | $3.50 \times 10^3$ |
| ADC wav LLH glszm LAHGLE               | MEAN ODSum Haralick IMOC2 F12                | $1.74 \times 10^{-3}$ | -0.606  | $3.47 \times 10^3$ |
| ADC firstorder Median                  | MEAN ODSum Haralick IMOC2 F12                | $1.77 \times 10^{-3}$ | -0.606  | $3.41 \times 10^3$ |
| ADC wav LLH gldm SDLGLE                | CD200um ngtdm Strength                       | $1.80 \times 10^{-3}$ | 0.605   | $3.33 \times 10^3$ |
| ADC wav LLH firstorder RootMeanSquared | MEAN ODSum Haralick IMOC2 F12                | $1.81 \times 10^{-3}$ | -0.605  | $3.31 \times 10^3$ |
| ADC wav LLH glrlm LRHGLE               | CD100um ngtdm Strength                       | $1.85 \times 10^{-3}$ | 0.604   | $3.23 \times 10^3$ |
| ADC lbp 3D m2 firstorder Range         | CD200um wav LL firstorder Kurtosis           | $1.86 \times 10^{-3}$ | -0.604  | $3.22 \times 10^3$ |
| ADC wav LLH ngtdm Strength             | CD100um ngtdm Strength                       | $1.90 \times 10^{-3}$ | 0.604   | $3.14 \times 10^3$ |
| ADC wav HLL ngtdm Complexity           | CD200um wav HL ngtdm Complexity              | $1.93 \times 10^{-3}$ | 0.603   | $3.09 \times 10^3$ |
| ADC wav HHH glcm MaximumProbability    | CD150um glszm LALGLE                         | $1.93 \times 10^{-3}$ | 0.603   | $3.08 \times 10^3$ |
| ADC wav LHL gldm LDHGLE                | CD100um ngtdm Strength                       | $2.00 \times 10^{-3}$ | 0.602   | $2.97 \times 10^3$ |
| ADC wav LLL glcm InverseVariance       | CD150um lbp 2D glrlm RunVariance             | $2.00 \times 10^{-3}$ | 0.602   | $2.96 \times 10^3$ |

| Radiomic feature name                  | Pathomic feature name                        | $\rho$                | Q-value | BF                 |
|----------------------------------------|----------------------------------------------|-----------------------|---------|--------------------|
| ADC wav HLH glcm ClusterShade          | CD100um ngtdm Strength                       | $2.02 \times 10^{-3}$ | -0.602  | $2.93 \times 10^3$ |
| ADC wav HHH glrlm LRHGLE               | CD100um ngtdm Strength                       | $2.11 \times 10^{-3}$ | 0.601   | $2.79 \times 10^3$ |
| ADC wav HLH firstorder RootMeanSquared | CD100um ngtdm Strength                       | $2.16 \times 10^{-3}$ | 0.6     | $2.72 \times 10^3$ |
| ADC wav HLL firstorder Maximum         | CD150um wav HH glcm ClusterProminence        | $2.20 \times 10^{-3}$ | 0.6     | $2.68 \times 10^3$ |
| ADC lbp 2D glszm ZoneVariance          | MEAN Cytoplasm EosinODStdDev                 | $2.32 \times 10^{-3}$ | 0.599   | $2.53 \times 10^3$ |
| ADC wav LLL glcm InverseVariance       | CD150um glszm LALGLE                         | $2.45 \times 10^{-3}$ | 0.597   | $2.40 \times 10^3$ |
| ADC wav LHL gldm DependenceVariance    | CD150um glszm LALGLE                         | $2.46 \times 10^{-3}$ | 0.597   | $2.38 \times 10^3$ |
| ADC wav HLH ngtdm Strength             | CD100um ngtdm Strength                       | $2.58 \times 10^{-3}$ | 0.596   | $2.27 \times 10^3$ |
| ADC wav HLL glcm InverseVariance       | CD150um glszm LALGLE                         | $2.62 \times 10^{-3}$ | 0.596   | $2.23 \times 10^3$ |
| ADC wav HHH firstorder Maximum         | MEAN ODSum Haralick ASM F0                   | $2.66 \times 10^{-3}$ | 0.595   | $2.19 \times 10^3$ |
| ADC lbp 3D m2 gldm LDLGLE              | CD200um wav LL firstorder Kurtosis           | $2.91 \times 10^{-3}$ | 0.593   | $2.01 \times 10^3$ |
| ADC lbp 3D k firstorder Minimum        | MEAN ODSum Haralick IMOC2 F12                | $2.92 \times 10^{-3}$ | -0.593  | $2.00 \times 10^3$ |
| ADC lbp 3D m1 gldm SDLGLE              | MEAN ODSum Haralick IMOC2 F12                | $3.09 \times 10^{-3}$ | -0.592  | $1.89 \times 10^3$ |
| ADC wav LLH firstorder RootMeanSquared | CD100um ngtdm Strength                       | $3.14 \times 10^{-3}$ | 0.591   | $1.86 \times 10^3$ |
| ADC wav HLL glcm ClusterShade          | CD200um wav HL ngtdm Complexity              | $3.14 \times 10^{-3}$ | -0.591  | $1.85 \times 10^3$ |
| ADC wav LLL firstorder Maximum         | MEAN ODSum Haralick ASM F0                   | $3.35 \times 10^{-3}$ | 0.59    | $1.74 \times 10^3$ |
| ADC glcm ClusterShade                  | MEAN ODSum Haralick ASM F0                   | $3.36 \times 10^{-3}$ | 0.589   | $1.73 \times 10^3$ |
| ADC wav LLH gldm LDHGLE                | MEAN ODSum Haralick IMOC2 F12                | $3.37 \times 10^{-3}$ | -0.589  | $1.72 \times 10^3$ |
| ADC wav HLL firstorder TotalEnergy     | CD200um wav HH ngtdm Complexity              | $3.37 \times 10^{-3}$ | 0.589   | $1.71 \times 10^3$ |
| ADC wav LHL firstorder RootMeanSquared | CD100um ngtdm Strength                       | $3.49 \times 10^{-3}$ | 0.588   | $1.66 \times 10^3$ |
| ADC wav LHH firstorder Maximum         | MEAN ODSum Haralick IMOC2 F12                | $3.54 \times 10^{-3}$ | -0.588  | $1.63 \times 10^3$ |
| ADC glcm InverseVariance               | CD150um lbp 2D glrlm RunVariance             | $3.56 \times 10^{-3}$ | 0.588   | $1.62 \times 10^3$ |
| ADC wav LHL firstorder Maximum         | CD200um ngtdm Strength                       | $3.57 \times 10^{-3}$ | 0.588   | $1.61 \times 10^3$ |
| ADC glcm DifferenceAverage             | MEAN ODSum Haralick ASM F0                   | $3.95 \times 10^{-3}$ | 0.585   | $1.46 \times 10^3$ |
| ADC wav HHL glcm InverseVariance       | CD150um lbp 2D glrlm RunVariance             | $4.11 \times 10^{-3}$ | 0.584   | $1.40 \times 10^3$ |
| ADC lbp 3D k ngtdm Strength            | MEAN ODSum Haralick ASM F0                   | $4.13 \times 10^{-3}$ | 0.584   | $1.39 \times 10^3$ |
| ADC wav HLL glcm ClusterShade          | CD200um wav HH firstorder InterquartileRange | $4.17 \times 10^{-3}$ | -0.584  | $1.37 \times 10^3$ |
| ADC lbp 3D k ngtdm Strength            | CD200um ngtdm Strength                       | $4.25 \times 10^{-3}$ | 0.583   | $1.34 \times 10^3$ |
| ADC wav HHL glcm ClusterShade          | CD200um ngtdm Strength                       | $4.27 \times 10^{-3}$ | 0.583   | $1.34 \times 10^3$ |

| Radiomic feature name               | Pathomic feature name             | $\rho$                | Q-value | BF                 |
|-------------------------------------|-----------------------------------|-----------------------|---------|--------------------|
| ADC glcm InverseVariance            | CD150um glszm LALGLE              | $4.36 \times 10^{-3}$ | 0.582   | $1.31 \times 10^3$ |
| ADC wav HHL glcm ClusterShade       | MEAN ODSum Haralick IMOC2 F12     | $4.63 \times 10^{-3}$ | -0.581  | $1.23 \times 10^3$ |
| ADC wav LLH gldm LDHGLE             | CD100um ngtdm Strength            | $4.84 \times 10^{-3}$ | 0.58    | $1.18 \times 10^3$ |
| ADC wav LLH gldm DependenceVariance | CD150um glszm LALGLE              | $4.99 \times 10^{-3}$ | 0.579   | $1.14 \times 10^3$ |
| ADC lbp 3D k ngtdm Strength         | MEAN ODSum Haralick IMOC2 F12     | $5.01 \times 10^{-3}$ | -0.579  | $1.13 \times 10^3$ |
| ADC wav HLH glrlm SRLGLE            | CD150um glszm LALGLE              | $5.01 \times 10^{-3}$ | 0.579   | $1.13 \times 10^3$ |
| ADC wav LLH firstorder 10Percentile | CD100um ngtdm Strength            | $5.02 \times 10^{-3}$ | -0.579  | $1.13 \times 10^3$ |
| ADC wav LLH firstorder Mean         | MEAN ODSum Haralick ASM F0        | $5.12 \times 10^{-3}$ | 0.578   | $1.10 \times 10^3$ |
| ADC wav HHL glcm InverseVariance    | CD150um glszm LALGLE              | $5.24 \times 10^{-3}$ | 0.578   | $1.08 \times 10^3$ |
| ADC lbp 3D k firstorder Minimum     | MEAN ODSum Haralick ASM F0        | $5.32 \times 10^{-3}$ | 0.577   | $1.06 \times 10^3$ |
| ADC wav HLL gldm LDHGLE             | CD200um wav HH ngtdm Complexity   | $5.36 \times 10^{-3}$ | 0.577   | $1.05 \times 10^3$ |
| ADC wav LHL ngtdm Strength          | CD100um ngtdm Strength            | $5.45 \times 10^{-3}$ | 0.576   | $1.03 \times 10^3$ |
| ADC wav LLL ngtdm Strength          | CD50um ngtdm Complexity           | $5.77 \times 10^{-3}$ | 0.575   | $9.73 \times 10^2$ |
| ADC wav HLL firstorder Median       | CD100um ngtdm Strength            | $5.77 \times 10^{-3}$ | 0.575   | $9.71 \times 10^2$ |
| ADC wav LLL firstorder Maximum      | CD200um ngtdm Strength            | $5.94 \times 10^{-3}$ | 0.574   | $9.44 \times 10^2$ |
| ADC wav HLL glcm InverseVariance    | CD150um lbp 2D glrlm RunVariance  | $6.43 \times 10^{-3}$ | 0.572   | $8.74 \times 10^2$ |
| ADC wav HHL ngtdm Strength          | CD100um ngtdm Strength            | $6.50 \times 10^{-3}$ | 0.572   | $8.63 \times 10^2$ |
| ADC wav HLH firstorder Median       | CD200um ngtdm Strength            | $6.51 \times 10^{-3}$ | 0.572   | $8.58 \times 10^2$ |
| ADC wav LLH firstorder Mean         | CD100um ngtdm Strength            | $6.62 \times 10^{-3}$ | 0.571   | $8.43 \times 10^2$ |
| ADC wav HLL glcm ClusterProminence  | CD50um wav HL glcm ClusterShade   | $6.74 \times 10^{-3}$ | 0.571   | $8.27 \times 10^2$ |
| ADC wav LLH gldm SDLGLE             | MEAN ODSum Haralick ASM F0        | $7.00 \times 10^{-3}$ | 0.57    | $7.96 \times 10^2$ |
| ADC wav LLH glszm LAHGLE            | CD100um ngtdm Strength            | $7.18 \times 10^{-3}$ | 0.569   | $7.75 \times 10^2$ |
| ADC wav HHL glcm Idmn               | MEAN ODSum Haralick IMOC2 F12     | $7.24 \times 10^{-3}$ | 0.569   | $7.68 \times 10^2$ |
| ADC wav HLH firstorder Median       | MEAN ODSum Haralick IMOC2 F12     | $7.24 \times 10^{-3}$ | -0.569  | $7.66 \times 10^2$ |
| ADC wav HLL glcm ClusterProminence  | CD200um wav HL ngtdm Complexity   | $7.65 \times 10^{-3}$ | 0.567   | $7.26 \times 10^2$ |
| ADC wav LLH firstorder 90Percentile | MEAN ODSum Haralick IMOC2 F12     | $7.67 \times 10^{-3}$ | -0.567  | $7.22 \times 10^2$ |
| ADC wav LLH firstorder 90Percentile | CD100um ngtdm Strength            | $7.73 \times 10^{-3}$ | 0.567   | $7.15 \times 10^2$ |
| ADC wav HHL glszm LAHGLE            | MEAN ODSum Haralick ASM F0        | $7.84 \times 10^{-3}$ | 0.566   | $7.04 \times 10^2$ |
| ADC wav HLH gldm SDLGLE             | MEAN ODSum Haralick ASM F0        | $7.85 \times 10^{-3}$ | 0.566   | $7.01 \times 10^2$ |
| ADC lbp 2D glszm ZoneVariance       | MEAN Cell EosinODMax              | $8.58 \times 10^{-3}$ | 0.564   | $6.43 \times 10^2$ |
| ADC wav LHH glcm Idm                | CD100um lbp 2D glszm ZoneVariance | $8.92 \times 10^{-3}$ | 0.563   | $6.19 \times 10^2$ |

| Radiomic feature name              | Pathomic feature name                        | $\rho$                | Q-value | BF                 |
|------------------------------------|----------------------------------------------|-----------------------|---------|--------------------|
| ADC wav LHH firstorder Maximum     | CD100um ngtdm Strength                       | $9.06 \times 10^{-3}$ | 0.563   | $6.09 \times 10^2$ |
| ADC lbp 3D k firstorder Minimum    | CD150um ngtdm Strength                       | $9.27 \times 10^{-3}$ | 0.562   | $5.94 \times 10^2$ |
| ADC wav HLL firstorder TotalEnergy | CD200um wav HH firstorder InterquartileRange | $9.47 \times 10^{-3}$ | 0.561   | $5.81 \times 10^2$ |
| ADC wav LHH glcm Idm               | CD100um glrlm RunVariance                    | $9.53 \times 10^{-3}$ | 0.561   | $5.76 \times 10^2$ |
| ADC lbp 3D m1 glcm JointEnergy     | CD200um ngtdm Strength                       | $9.71 \times 10^{-3}$ | 0.56    | $5.65 \times 10^2$ |
| ADC wav LHH ngtdm Coarseness       | CD100um lbp 2D glcm JointEnergy              | $1.00 \times 10^{-2}$ | 0.56    | $5.48 \times 10^2$ |
| ADC lbp 3D m2 glszm LGLZE          | MEAN ODSum Haralick IMOC2 F12                | $1.03 \times 10^{-2}$ | -0.559  | $5.30 \times 10^2$ |
| ADC firstorder TotalEnergy         | CD200um wav HH ngtdm Complexity              | $1.05 \times 10^{-2}$ | 0.558   | $5.23 \times 10^2$ |
| ADC firstorder 10Percentile        | CD150um ngtdm Strength                       | $1.06 \times 10^{-2}$ | 0.558   | $5.15 \times 10^2$ |
| ADC wav LLH glcm InverseVariance   | CD100um lbp 2D glszm ZoneVariance            | $1.08 \times 10^{-2}$ | 0.558   | $5.06 \times 10^2$ |
| ADC lbp 3D k glcm Correlation      | MEAN ODSum Haralick ASM F0                   | $1.09 \times 10^{-2}$ | -0.557  | $5.00 \times 10^2$ |
| ADC wav LHH firstorder Minimum     | CD200um ngtdm Strength                       | $1.14 \times 10^{-2}$ | -0.556  | $4.77 \times 10^2$ |
| ADC lbp 2D glcm JointEnergy        | CD200um wav LL firstorder Kurtosis           | $1.14 \times 10^{-2}$ | 0.556   | $4.77 \times 10^2$ |
| ADC wav LHL glszm SALGLE           | CD200um ngtdm Strength                       | $1.17 \times 10^{-2}$ | 0.555   | $4.63 \times 10^2$ |
| ADC lbp 2D gldm LDLGLE             | CD100um lbp 2D glcm JointEnergy              | $1.25 \times 10^{-2}$ | 0.553   | $4.35 \times 10^2$ |
| ADC wav HLH gldm SDLGLE            | CD200um ngtdm Strength                       | $1.28 \times 10^{-2}$ | 0.553   | $4.24 \times 10^2$ |
| ADC wav HLH gldm SDLGLE            | CD200um lbp 2D glcm Idm                      | $1.30 \times 10^{-2}$ | 0.552   | $4.19 \times 10^2$ |
| ADC lbp 2D glszm ZoneVariance      | MEAN Cell EosinODStdDev                      | $1.30 \times 10^{-2}$ | 0.552   | $4.16 \times 10^2$ |
| ADC lbp 3D m2 glrlm SRLGLE         | MEAN ODSum Haralick IMOC2 F12                | $1.30 \times 10^{-2}$ | -0.552  | $4.16 \times 10^2$ |
| ADC wav LLH firstorder Maximum     | MEAN ODSum Haralick ASM F0                   | $1.33 \times 10^{-2}$ | 0.551   | $4.05 \times 10^2$ |
| ADC wav HHH firstorder Mean        | CD200um ngtdm Strength                       | $1.33 \times 10^{-2}$ | -0.551  | $4.05 \times 10^2$ |
| ADC wav LHH gldm LDHGLE            | CD200um ngtdm Strength                       | $1.34 \times 10^{-2}$ | 0.551   | $4.01 \times 10^2$ |
| ADC lbp 3D m2 gldm SDLGLE          | CD200um ngtdm Strength                       | $1.39 \times 10^{-2}$ | 0.55    | $3.87 \times 10^2$ |
| ADC wav HHH firstorder Maximum     | CD100um ngtdm Strength                       | $1.40 \times 10^{-2}$ | 0.55    | $3.83 \times 10^2$ |
| ADC lbp 3D m2 gldm SDHGLE          | CD200um wav LL firstorder Kurtosis           | $1.48 \times 10^{-2}$ | -0.548  | $3.64 \times 10^2$ |
| ADC wav HLL firstorder Maximum     | CD200um wav HL glcm ClusterProminence        | $1.53 \times 10^{-2}$ | 0.547   | $3.52 \times 10^2$ |
| ADC wav HHL firstorder TotalEnergy | CD150um wav HH glcm ClusterProminence        | $1.53 \times 10^{-2}$ | 0.547   | $3.50 \times 10^2$ |
| ADC wav LLL gldm LDHGLE            | CD200um wav HL glcm ClusterProminence        | $1.53 \times 10^{-2}$ | 0.547   | $3.49 \times 10^2$ |
| ADC lbp 3D m1 gldm SDLGLE          | MEAN ODSum Haralick ASM F0                   | $1.55 \times 10^{-2}$ | 0.547   | $3.46 \times 10^2$ |

| Radiomic feature name              | Pathomic feature name                        | $\rho$                | Q-value | BF                 |
|------------------------------------|----------------------------------------------|-----------------------|---------|--------------------|
| ADC wav LHH ngtdm Coarseness       | CD50um wav LL glcm Imc2                      | $1.55 \times 10^{-2}$ | -0.547  | $3.43 \times 10^2$ |
| ADC wav HLH gldm SDLGLE            | CD100um ngtdm Strength                       | $1.60 \times 10^{-2}$ | 0.546   | $3.34 \times 10^2$ |
| ADC wav HLL gldm LDHGLE            | CD200um wav HH firstorder InterquartileRange | $1.61 \times 10^{-2}$ | 0.546   | $3.30 \times 10^2$ |
| ADC wav LLH glcm InverseVariance   | CD150um glszm LALGLE                         | $1.70 \times 10^{-2}$ | 0.544   | $3.14 \times 10^2$ |
| ADC wav LLH glcm InverseVariance   | CD100um glrlm RunVariance                    | $1.75 \times 10^{-2}$ | 0.543   | $3.05 \times 10^2$ |
| ADC wav HLH ngtdm Complexity       | CD50um wav HL glcm ClusterShade              | $1.76 \times 10^{-2}$ | 0.543   | $3.03 \times 10^2$ |
| ADC wav LHH ngtdm Coarseness       | CD100um lbp 2D glcm SumEntropy               | $1.76 \times 10^{-2}$ | -0.543  | $3.01 \times 10^2$ |
| ADC firstorder Median              | CD150um ngtdm Strength                       | $1.77 \times 10^{-2}$ | 0.543   | $3.00 \times 10^2$ |
| ADC lbp 3D m2 gldm SDLGLE          | MEAN ODSum Haralick ASM F0                   | $1.77 \times 10^{-2}$ | 0.543   | $2.99 \times 10^2$ |
| ADC wav LHH firstorder Minimum     | MEAN ODSum Haralick ASM F0                   | $1.80 \times 10^{-2}$ | -0.542  | $2.94 \times 10^2$ |
| ADC firstorder Minimum             | CD150um ngtdm Strength                       | $1.81 \times 10^{-2}$ | 0.542   | $2.92 \times 10^2$ |
| ADC wav LHH firstorder Mean        | CD150um ngtdm Strength                       | $1.81 \times 10^{-2}$ | -0.542  | $2.91 \times 10^2$ |
| ADC wav HLL glcm ClusterProminence | CD150um wav HH ngtdm Strength                | $1.84 \times 10^{-2}$ | 0.541   | $2.86 \times 10^2$ |
| ADC wav LHH glcm Idm               | CD150um glszm LALGLE                         | $1.88 \times 10^{-2}$ | 0.541   | $2.80 \times 10^2$ |
| ADC wav HHH firstorder Maximum     | MEAN ODSum Haralick IMOC2 F12                | $1.93 \times 10^{-2}$ | -0.54   | $2.72 \times 10^2$ |
| ADC wav LHL firstorder Maximum     | MEAN ODSum Haralick IMOC2 F12                | $1.97 \times 10^{-2}$ | -0.539  | $2.66 \times 10^2$ |
| ADC wav HLL firstorder TotalEnergy | CD200um wav HL ngtdm Complexity              | $1.98 \times 10^{-2}$ | 0.539   | $2.64 \times 10^2$ |
| ADC lbp 3D m2 glszm SAHGLE         | CD200um firstorder Kurtosis                  | $1.98 \times 10^{-2}$ | -0.539  | $2.63 \times 10^2$ |
| ADC wav HLL glcm Idmn              | MEAN ODSum Haralick IMOC2 F12                | $1.99 \times 10^{-2}$ | 0.539   | $2.62 \times 10^2$ |
| ADC wav HHL glszm LAHGLE           | CD200um ngtdm Strength                       | $1.99 \times 10^{-2}$ | 0.539   | $2.61 \times 10^2$ |
| ADC wav HLH ngtdm Complexity       | CD200um wav HH firstorder InterquartileRange | $1.99 \times 10^{-2}$ | 0.539   | $2.61 \times 10^2$ |
| ADC wav HHL firstorder Mean        | CD150um ngtdm Strength                       | $2.01 \times 10^{-2}$ | -0.538  | $2.58 \times 10^2$ |
| ADC wav LLL firstorder Minimum     | CD150um ngtdm Strength                       | $2.01 \times 10^{-2}$ | 0.538   | $2.57 \times 10^2$ |
| ADC lbp 2D gldm LDLGLE             | CD100um lbp 2D glcm JointEntropy             | $2.01 \times 10^{-2}$ | -0.538  | $2.56 \times 10^2$ |
| ADC wav HLH gldm SDLGLE            | MEAN ODSum HaralickInverseDifferenceMomen    | $2.01 \times 10^{-2}$ | 0.538   | $2.56 \times 10^2$ |
| ADC wav HHL firstorder Maximum     | MEAN ODSum Haralick ASM F0                   | $2.01 \times 10^{-2}$ | 0.538   | $2.56 \times 10^2$ |
| ADC lbp 3D m2 glrlm SRLGLE         | CD200um ngtdm Strength                       | $2.01 \times 10^{-2}$ | 0.538   | $2.55 \times 10^2$ |
| ADC wav HLH glrlm SRLGLE           | CD150um lbp 2D glrlm RunVariance             | $2.08 \times 10^{-2}$ | 0.537   | $2.47 \times 10^2$ |
| ADC lbp 3D m2 glszm LGLZE          | CD200um ngtdm Strength                       | $2.11 \times 10^{-2}$ | 0.537   | $2.43 \times 10^2$ |
| ADC wav LLH gldm SDLGLE            | CD100um ngtdm Strength                       | $2.14 \times 10^{-2}$ | 0.536   | $2.40 \times 10^2$ |
| ADC wav HLH gldm SDLGLE            | CD200um wav LH glcm ClusterShade             | $2.16 \times 10^{-2}$ | -0.536  | $2.37 \times 10^2$ |

| Radiomic feature name                       | Pathomic feature name                        | $\rho$                | Q-value | BF                 |
|---------------------------------------------|----------------------------------------------|-----------------------|---------|--------------------|
| ADC wav LHH gldm DependenceVariance         | CD100um lbp 2D glszm ZoneVariance            | $2.18 \times 10^{-2}$ | 0.536   | $2.35 \times 10^2$ |
| ADC wav HLL ngtdm Complexity                | CD50um wav HL glcm ClusterShade              | $2.22 \times 10^{-2}$ | 0.535   | $2.30 \times 10^2$ |
| ADC wav HLL firstorder Maximum              | CD50um wav HL glcm ClusterShade              | $2.24 \times 10^{-2}$ | 0.535   | $2.28 \times 10^2$ |
| ADC wav HLH ngtdm Complexity                | CD200um wav LH firstorder InterquartileRange | $2.26 \times 10^{-2}$ | 0.534   | $2.25 \times 10^2$ |
| ADC glcm ClusterTendency                    | CD150um wav HH glcm ClusterProminence        | $2.27 \times 10^{-2}$ | 0.534   | $2.23 \times 10^2$ |
| ADC wav LHH gldm DependenceVariance         | CD100um glrlm RunVariance                    | $2.28 \times 10^{-2}$ | 0.534   | $2.22 \times 10^2$ |
| ADC wav HLL gldm LDHGLE                     | CD200um wav HL ngtdm Complexity              | $2.35 \times 10^{-2}$ | 0.533   | $2.16 \times 10^2$ |
| ADC lbp 3D m2 firstorder InterquartileRange | CD150um lbp 2D glcm InverseVariance          | $2.40 \times 10^{-2}$ | 0.533   | $2.11 \times 10^2$ |
| ADC wav HLL glcm ClusterProminence          | CD100um glcm DifferenceVariance              | $2.43 \times 10^{-2}$ | 0.532   | $2.08 \times 10^2$ |
| ADC wav HLH glcm Idm                        | CD100um glrlm RunVariance                    | $2.44 \times 10^{-2}$ | 0.532   | $2.07 \times 10^2$ |
| ADC wav HLH glrlm SRLGLE                    | CD100um glrlm RunVariance                    | $2.50 \times 10^{-2}$ | 0.531   | $2.02 \times 10^2$ |
| ADC glcm ClusterTendency                    | CD50um ngtdm Complexity                      | $2.50 \times 10^{-2}$ | 0.531   | $2.02 \times 10^2$ |
| ADC wav LLH glrlm LRHGLE                    | CD150um ngtdm Strength                       | $2.50 \times 10^{-2}$ | 0.531   | $2.02 \times 10^2$ |
| ADC wav HLL gldm LDHGLE                     | CD50um ngtdm Complexity                      | $2.52 \times 10^{-2}$ | 0.531   | $2.00 \times 10^2$ |
| ADC wav LLH firstorder Median               | CD150um ngtdm Strength                       | $2.54 \times 10^{-2}$ | 0.531   | $1.98 \times 10^2$ |
| ADC wav HHL glszm SALGLE                    | CD150um lbp 2D glrlm RunVariance             | $2.56 \times 10^{-2}$ | 0.53    | $1.95 \times 10^2$ |
| ADC firstorder Range                        | CD50um ngtdm Complexity                      | $2.56 \times 10^{-2}$ | 0.53    | $1.95 \times 10^2$ |
| ADC lbp 2D glszm ZoneVariance               | MEAN ODSum Max                               | $2.59 \times 10^{-2}$ | 0.53    | $1.93 \times 10^2$ |
| ADC wav HLH glrlm SRLGLE                    | CD100um lbp 2D glszm ZoneVariance            | $2.59 \times 10^{-2}$ | 0.53    | $1.92 \times 10^2$ |
| ADC firstorder TotalEnergy                  | CD50um glcm DifferenceAverage                | $2.59 \times 10^{-2}$ | 0.53    | $1.92 \times 10^2$ |
| ADC wav HLH ngtdm Complexity                | CD150um glcm DifferenceVariance              | $2.60 \times 10^{-2}$ | 0.53    | $1.91 \times 10^2$ |
| ADC wav HLH firstorder Mean                 | CD150um wav HH glcm ClusterProminence        | $2.61 \times 10^{-2}$ | -0.529  | $1.90 \times 10^2$ |
| ADC wav HLH glcm Idm                        | CD100um lbp 2D glszm ZoneVariance            | $2.63 \times 10^{-2}$ | 0.529   | $1.88 \times 10^2$ |
| ADC wav LLL gldm LDHGLE                     | CD200um wav HH firstorder InterquartileRange | $2.66 \times 10^{-2}$ | 0.529   | $1.86 \times 10^2$ |
| ADC wav HLL glcm ClusterProminence          | CD200um wav HH firstorder 10Percentile       | $2.66 \times 10^{-2}$ | -0.529  | $1.86 \times 10^2$ |
| ADC wav HLL glcm ClusterProminence          | CD200um wav LH firstorder InterquartileRange | $2.66 \times 10^{-2}$ | 0.529   | $1.86 \times 10^2$ |
| ADC wav HLH ngtdm Complexity                | MEAN ODSum Haralick ASM F0                   | $2.67 \times 10^{-2}$ | 0.528   | $1.84 \times 10^2$ |
| ADC wav LLH firstorder Mean                 | CD150um ngtdm Strength                       | $2.67 \times 10^{-2}$ | 0.528   | $1.83 \times 10^2$ |
| ADC wav HLL glcm ClusterProminence          | CD150um glcm DifferenceVariance              | $2.67 \times 10^{-2}$ | 0.528   | $1.83 \times 10^2$ |



| Radiomic feature name                        | Pathomic feature name                    | $\rho$                | Q-value | BF                 |
|----------------------------------------------|------------------------------------------|-----------------------|---------|--------------------|
| ADC lbp 3D m2 glrlm SRHGLE                   | CD200um firstorder Kurtosis              | $2.68 \times 10^{-2}$ | -0.528  | $1.82 \times 10^2$ |
| ADC lbp 3D m1 glcm JointAverage              | CD200um wav LL firstorder Kurtosis       | $2.68 \times 10^{-2}$ | -0.528  | $1.82 \times 10^2$ |
| ADC wav LHL glszm SALGLE                     | MEAN ODSum Haralick ASM F0               | $2.68 \times 10^{-2}$ | 0.528   | $1.82 \times 10^2$ |
| ADC wav LHH ngtdm Coarseness                 | CD150um lbp 2D glcm ClusterProminence    | $2.68 \times 10^{-2}$ | -0.528  | $1.82 \times 10^2$ |
| ADC wav LLL ngtdm Strength                   | CD200um wav HH glcm JointAverage         | $2.69 \times 10^{-2}$ | 0.528   | $1.81 \times 10^2$ |
| ADC lbp 3D m1 glszm GLNUN                    | CD200um wav LL firstorder Kurtosis       | $2.70 \times 10^{-2}$ | 0.528   | $1.79 \times 10^2$ |
| ADC wav HLH gldm SDLGLE                      | CD200um lbp 2D ngtdm Complexity          | $2.77 \times 10^{-2}$ | -0.527  | $1.75 \times 10^2$ |
| ADC lbp 3D m1 glrlm HighGrayLevelRunEmphasis | CD200um wav LL firstorder Kurtosis       | $2.77 \times 10^{-2}$ | -0.527  | $1.75 \times 10^2$ |
| ADC wav HLL firstorder 10Percentile          | CD150um wav HH glcm ClusterProminence    | $2.78 \times 10^{-2}$ | -0.527  | $1.74 \times 10^2$ |
| ADC wav HLH gldm LDHGLE                      | CD200um lbp 2D glrlm ShortRunEmphasis    | $2.80 \times 10^{-2}$ | 0.526   | $1.72 \times 10^2$ |
| ADC wav HHH gldm LDHGLE                      | CD200um ngtdm Strength                   | $2.90 \times 10^{-2}$ | 0.525   | $1.67 \times 10^2$ |
| ADC wav HLH ngtdm Complexity                 | CD150um wav HH ngtdm Strength            | $2.92 \times 10^{-2}$ | 0.525   | $1.65 \times 10^2$ |
| ADC wav LHH gldm DependenceVariance          | CD150um lbp 2D glrlm RunVariance         | $2.93 \times 10^{-2}$ | 0.525   | $1.64 \times 10^2$ |
| ADC glcm DifferenceAverage                   | CD200um ngtdm Strength                   | $2.98 \times 10^{-2}$ | 0.524   | $1.61 \times 10^2$ |
| ADC wav HLH firstorder Mean                  | CD200um wav HL glcm ClusterProminence    | $3.03 \times 10^{-2}$ | -0.524  | $1.58 \times 10^2$ |
| ADC wav HLL ngtdm Complexity                 | CD200um wav HH firstorder Maximum        | $3.06 \times 10^{-2}$ | 0.524   | $1.57 \times 10^2$ |
| ADC wav HLH gldm SDLGLE                      | CD150um lbp 2D glcm DifferenceEntropy    | $3.06 \times 10^{-2}$ | -0.523  | $1.56 \times 10^2$ |
| ADC wav LHL glcm DifferenceVariance          | MEAN ODSum HaralickDifferenceVariance F9 | $3.08 \times 10^{-2}$ | 0.523   | $1.55 \times 10^2$ |
| ADC wav HLL glcm ClusterProminence           | CD50um glcm DifferenceAverage            | $3.10 \times 10^{-2}$ | 0.523   | $1.54 \times 10^2$ |
| ADC lbp 3D m2 firstorder Range               | CD200um ngtdm Strength                   | $3.18 \times 10^{-2}$ | -0.522  | $1.50 \times 10^2$ |
| ADC lbp 2D glcm SumEntropy                   | CD200um wav LL firstorder Kurtosis       | $3.18 \times 10^{-2}$ | -0.522  | $1.50 \times 10^2$ |
| ADC wav LLH firstorder Mean                  | CD150um glcm DifferenceVariance          | $3.18 \times 10^{-2}$ | 0.522   | $1.50 \times 10^2$ |
| ADC wav LLH glcm ClusterProminence           | MEAN ODSum HaralickDifferenceVariance F9 | $3.19 \times 10^{-2}$ | 0.522   | $1.49 \times 10^2$ |
| ADC wav HHH firstorder Median                | CD150um ngtdm Strength                   | $3.19 \times 10^{-2}$ | 0.522   | $1.49 \times 10^2$ |
| ADC wav HLH firstorder Median                | MEAN ODSum Haralick ASM F0               | $3.20 \times 10^{-2}$ | 0.522   | $1.48 \times 10^2$ |
| ADC wav LHH firstorder Median                | MEAN ODSum HaralickDifferenceVariance F9 | $3.21 \times 10^{-2}$ | -0.522  | $1.47 \times 10^2$ |
| ADC wav LLH glcm ClusterProminence           | CD150um ngtdm Strength                   | $3.23 \times 10^{-2}$ | 0.521   | $1.46 \times 10^2$ |
| ADC wav HLL glcm ClusterProminence           | CD200um wav HH firstorder Maximum        | $3.23 \times 10^{-2}$ | 0.521   | $1.46 \times 10^2$ |
| ADC wav HLL glcm ClusterProminence           | CD200um wav HL firstorder 90Percentile   | $3.23 \times 10^{-2}$ | 0.521   | $1.45 \times 10^2$ |
| ADC glcm ClusterTendency                     | MEAN ODSum Haralick ASM F0               | $3.23 \times 10^{-2}$ | 0.521   | $1.45 \times 10^2$ |
| ADC wav LHH firstorder Mean                  | MEAN ODSum HaralickDifferenceVariance F9 | $3.23 \times 10^{-2}$ | -0.521  | $1.45 \times 10^2$ |

| Radiomic feature name                  | Pathomic feature name                    | $\rho$                | Q-value | BF                 |
|----------------------------------------|------------------------------------------|-----------------------|---------|--------------------|
| ADC wav HLL firstorder Median          | MEAN ODSum HaralickDifferenceVariance F9 | $3.23 \times 10^{-2}$ | 0.521   | $1.45 \times 10^2$ |
| ADC firstorder TotalEnergy             | CD150um wav HH ngtdm Strength            | $3.25 \times 10^{-2}$ | 0.521   | $1.44 \times 10^2$ |
| ADC wav HLH glszm GrayLevelVariance    | CD150um ngtdm Strength                   | $3.26 \times 10^{-2}$ | 0.521   | $1.43 \times 10^2$ |
| ADC wav HHL glcm ClusterProminence     | MEAN ODSum HaralickDifferenceVariance F9 | $3.26 \times 10^{-2}$ | 0.521   | $1.43 \times 10^2$ |
| ADC wav HLL gldm LDHGLE                | CD50um wav HL glcm ClusterShade          | $3.37 \times 10^{-2}$ | 0.52    | $1.38 \times 10^2$ |
| ADC wav LHL glcm ClusterShade          | MEAN ODSum HaralickDifferenceVariance F9 | $3.38 \times 10^{-2}$ | -0.519  | $1.37 \times 10^2$ |
| ADC glcm ClusterShade                  | CD200um ngtdm Strength                   | $3.38 \times 10^{-2}$ | 0.519   | $1.37 \times 10^2$ |
| ADC wav HHL glcm Idmn                  | MEAN ODSum Haralick ASM F0               | $3.38 \times 10^{-2}$ | -0.519  | $1.37 \times 10^2$ |
| ADC wav HHL firstorder Mean            | MEAN ODSum HaralickDifferenceVariance F9 | $3.41 \times 10^{-2}$ | -0.519  | $1.36 \times 10^2$ |
| ADC firstorder TotalEnergy             | CD200um wav HH firstorder 10Percentile   | $3.41 \times 10^{-2}$ | -0.519  | $1.36 \times 10^2$ |
| ADC wav HLL ngtdm Contrast             | MEAN ODSum HaralickDifferenceVariance F9 | $3.41 \times 10^{-2}$ | 0.519   | $1.36 \times 10^2$ |
| ADC wav LHL gldm LDHGLE                | MEAN ODSum HaralickDifferenceVariance F9 | $3.42 \times 10^{-2}$ | 0.519   | $1.35 \times 10^2$ |
| ADC wav LLL ngtdm Contrast             | MEAN ODSum HaralickDifferenceVariance F9 | $3.42 \times 10^{-2}$ | 0.519   | $1.34 \times 10^2$ |
| ADC wav HLH ngtdm Contrast             | MEAN ODSum HaralickDifferenceVariance F9 | $3.42 \times 10^{-2}$ | 0.519   | $1.34 \times 10^2$ |
| ADC wav LLH ngtdm Contrast             | MEAN ODSum HaralickDifferenceVariance F9 | $3.42 \times 10^{-2}$ | 0.518   | $1.33 \times 10^2$ |
| ADC wav LHL ngtdm Contrast             | MEAN ODSum HaralickDifferenceVariance F9 | $3.42 \times 10^{-2}$ | 0.518   | $1.33 \times 10^2$ |
| ADC wav HLL glcm ClusterProminence     | CD50um ngtdm Complexity                  | $3.42 \times 10^{-2}$ | 0.518   | $1.33 \times 10^2$ |
| ADC wav HHH ngtdm Contrast             | MEAN ODSum HaralickDifferenceVariance F9 | $3.42 \times 10^{-2}$ | 0.518   | $1.33 \times 10^2$ |
| ADC wav LHH ngtdm Contrast             | MEAN ODSum HaralickDifferenceVariance F9 | $3.42 \times 10^{-2}$ | 0.518   | $1.33 \times 10^2$ |
| ADC lbp 3D k glszm ZoneEntropy         | CD150um lbp 2D glcm ClusterTendency      | $3.43 \times 10^{-2}$ | 0.518   | $1.33 \times 10^2$ |
| ADC wav LHH glcm ClusterShade          | MEAN ODSum HaralickDifferenceVariance F9 | $3.44 \times 10^{-2}$ | 0.518   | $1.32 \times 10^2$ |
| ADC wav LHH firstorder RootMeanSquared | MEAN ODSum HaralickDifferenceVariance F9 | $3.46 \times 10^{-2}$ | 0.518   | $1.31 \times 10^2$ |
| ADC wav HHL glszm SALGLE               | CD100um glrlm RunVariance                | $3.47 \times 10^{-2}$ | 0.518   | $1.30 \times 10^2$ |
| ADC wav HHH glcm ClusterShade          | MEAN ODSum HaralickDifferenceVariance F9 | $3.50 \times 10^{-2}$ | 0.518   | $1.29 \times 10^2$ |
| ADC wav LLH firstorder RootMeanSquared | CD150um ngtdm Strength                   | $3.50 \times 10^{-2}$ | 0.517   | $1.29 \times 10^2$ |
| ADC wav LLH glcm ClusterShade          | MEAN ODSum HaralickDifferenceVariance F9 | $3.54 \times 10^{-2}$ | -0.517  | $1.27 \times 10^2$ |
| ADC wav LLH gldm SDLGLE                | MEAN ODSum HaralickDifferenceVariance F9 | $3.56 \times 10^{-2}$ | 0.517   | $1.27 \times 10^2$ |
| ADC lbp 3D m2 glszm HGLZE              | CD200um firstorder Kurtosis              | $3.61 \times 10^{-2}$ | -0.516  | $1.25 \times 10^2$ |
| ADC lbp 3D m2 glcm MaximumProbability  | CD200um wav LL firstorder Kurtosis       | $3.61 \times 10^{-2}$ | 0.516   | $1.25 \times 10^2$ |

| Radiomic feature name                      | Pathomic feature name                    | $\rho$                | Q-value | BF                 |
|--------------------------------------------|------------------------------------------|-----------------------|---------|--------------------|
| ADC wav LHL ngtdm Strength                 | MEAN ODSum HaralickDifferenceVariance F9 | $3.64 \times 10^{-2}$ | 0.516   | $1.23 \times 10^2$ |
| ADC wav HHL glszm SALGLE                   | CD150um glszm LALGLE                     | $3.65 \times 10^{-2}$ | 0.516   | $1.23 \times 10^2$ |
| ADC lbp 2D gldm LDLGLE                     | CD100um lbp 2D glszm GLNUN               | $3.65 \times 10^{-2}$ | 0.516   | $1.23 \times 10^2$ |
| ADC wav HLL ngtdm Complexity               | CD50um ngtdm Complexity                  | $3.66 \times 10^{-2}$ | 0.516   | $1.22 \times 10^2$ |
| ADC wav HHL glcm ClusterShade              | MEAN ODSum Haralick ASM F0               | $3.66 \times 10^{-2}$ | 0.516   | $1.22 \times 10^2$ |
| ADC lbp 3D m1 glcm JointEnergy             | CD200um wav LL firstorder Kurtosis       | $3.72 \times 10^{-2}$ | 0.515   | $1.20 \times 10^2$ |
| ADC wav LHH firstorder Median              | CD150um ngtdm Strength                   | $3.76 \times 10^{-2}$ | -0.515  | $1.18 \times 10^2$ |
| ADC wav HLL firstorder Maximum             | CD50um ngtdm Complexity                  | $3.76 \times 10^{-2}$ | 0.515   | $1.18 \times 10^2$ |
| ADC firstorder InterquartileRange          | CD50um ngtdm Complexity                  | $3.76 \times 10^{-2}$ | 0.515   | $1.18 \times 10^2$ |
| ADC lbp 2D gldm LDLGLE                     | CD100um lbp 2D glcm SumEntropy           | $3.76 \times 10^{-2}$ | -0.515  | $1.18 \times 10^2$ |
| ADC lbp 2D glszm GLNUN                     | CD200um wav LL firstorder Kurtosis       | $3.79 \times 10^{-2}$ | 0.514   | $1.17 \times 10^2$ |
| ADC wav LLH ngtdm Strength                 | MEAN ODSum HaralickDifferenceVariance F9 | $3.79 \times 10^{-2}$ | 0.514   | $1.17 \times 10^2$ |
| ADC wav HLH glcm Idm                       | CD150um glszm LALGLE                     | $3.79 \times 10^{-2}$ | 0.514   | $1.16 \times 10^2$ |
| ADC wav LHH ngtdm Strength                 | MEAN ODSum HaralickDifferenceVariance F9 | $3.79 \times 10^{-2}$ | 0.514   | $1.16 \times 10^2$ |
| ADC wav HLL ngtdm Complexity               | CD200um wav HH glcm JointAverage         | $3.80 \times 10^{-2}$ | 0.514   | $1.16 \times 10^2$ |
| ADC lbp 3D k glcm Correlation              | MEAN ODSum HaralickDifferenceVariance F9 | $3.80 \times 10^{-2}$ | -0.514  | $1.16 \times 10^2$ |
| ADC wav HLL firstorder 10Percentile        | CD50um ngtdm Complexity                  | $3.80 \times 10^{-2}$ | -0.514  | $1.15 \times 10^2$ |
| ADC wav LLH firstorder Maximum             | CD200um ngtdm Strength                   | $3.80 \times 10^{-2}$ | 0.514   | $1.15 \times 10^2$ |
| ADC wav HHL glszm SALGLE                   | CD100um lbp 2D glszm ZoneVariance        | $3.80 \times 10^{-2}$ | 0.514   | $1.15 \times 10^2$ |
| ADC wav LHL firstorder RootMeanSquared     | MEAN ODSum HaralickDifferenceVariance F9 | $3.80 \times 10^{-2}$ | 0.514   | $1.15 \times 10^2$ |
| ADC wav HHH firstorder RootMeanSquared     | MEAN ODSum HaralickDifferenceVariance F9 | $3.80 \times 10^{-2}$ | 0.514   | $1.15 \times 10^2$ |
| ADC wav HLH firstorder RootMeanSquared     | CD150um ngtdm Strength                   | $3.80 \times 10^{-2}$ | 0.514   | $1.14 \times 10^2$ |
| ADC glcm ClusterShade                      | MEAN ODSum Haralick IMOC2 F12            | $3.80 \times 10^{-2}$ | -0.514  | $1.14 \times 10^2$ |
| ADC wav HLH glszm GrayLevelVariance        | MEAN ODSum HaralickDifferenceVariance F9 | $3.85 \times 10^{-2}$ | 0.513   | $1.13 \times 10^2$ |
| ADC lbp 3D k glrlm LowGrayLevelRunEmphasis | CD200um ngtdm Strength                   | $3.86 \times 10^{-2}$ | 0.513   | $1.12 \times 10^2$ |
| ADC lbp 2D gldm LDLGLE                     | CD100um lbp 2D firstorder Uniformity     | $3.86 \times 10^{-2}$ | 0.513   | $1.12 \times 10^2$ |
| ADC lbp 3D m2 glcm JointAverage            | CD200um firstorder Kurtosis              | $3.92 \times 10^{-2}$ | -0.512  | $1.10 \times 10^2$ |
| ADC wav HHH firstorder RootMeanSquared     | CD150um ngtdm Strength                   | $3.92 \times 10^{-2}$ | 0.512   | $1.10 \times 10^2$ |
| ADC wav LLL gldm LDHGLE                    | CD200um wav HH ngtdm Complexity          | $3.92 \times 10^{-2}$ | 0.512   | $1.10 \times 10^2$ |
| ADC wav HLL glcm ClusterProminence         | CD200um wav HH glcm JointAverage         | $3.94 \times 10^{-2}$ | 0.512   | $1.09 \times 10^2$ |
| ADC wav LHH gldm LDHGLE                    | MEAN ODSum Haralick ASM F0               | $3.94 \times 10^{-2}$ | 0.512   | $1.08 \times 10^2$ |

| Radiomic feature name                  | Pathomic feature name                    | $\rho$                | Q-value | BF                 |
|----------------------------------------|------------------------------------------|-----------------------|---------|--------------------|
| ADC wav LHH ngtdm Coarseness           | CD100um lbp 2D glcm JointEntropy         | $3.94 \times 10^{-2}$ | -0.512  | $1.08 \times 10^2$ |
| ADC firstorder TotalEnergy             | CD50um wav HL glcm ClusterShade          | $3.94 \times 10^{-2}$ | 0.512   | $1.08 \times 10^2$ |
| ADC wav HLL firstorder Mean            | MEAN ODSum HaralickDifferenceVariance F9 | $3.94 \times 10^{-2}$ | 0.512   | $1.08 \times 10^2$ |
| ADC wav HLL ngtdm Complexity           | CD200um wav HL firstorder 90Percentile   | $3.94 \times 10^{-2}$ | 0.512   | $1.08 \times 10^2$ |
| ADC wav LHL glcm DifferenceVariance    | CD150um ngtdm Strength                   | $3.94 \times 10^{-2}$ | 0.512   | $1.08 \times 10^2$ |
| ADC wav HHL ngtdm Strength             | MEAN ODSum HaralickDifferenceVariance F9 | $3.94 \times 10^{-2}$ | 0.512   | $1.08 \times 10^2$ |
| ADC wav HHL glcm ClusterProminence     | CD150um ngtdm Strength                   | $3.94 \times 10^{-2}$ | 0.512   | $1.08 \times 10^2$ |
| ADC wav HLH glszm LAHGLE               | MEAN Cell EosinODMax                     | $4.07 \times 10^{-2}$ | 0.511   | $1.05 \times 10^2$ |
| ADC wav HLH ngtdm Complexity           | CD100um glcm DifferenceVariance          | $4.07 \times 10^{-2}$ | 0.511   | $1.04 \times 10^2$ |
| ADC wav LHH firstorder RootMeanSquared | CD150um ngtdm Strength                   | $4.09 \times 10^{-2}$ | 0.511   | $1.04 \times 10^2$ |
| ADC wav LLH ngtdm Strength             | CD150um ngtdm Strength                   | $4.13 \times 10^{-2}$ | 0.51    | $1.03 \times 10^2$ |
| ADC wav LHL gldm LDHGLE                | CD150um ngtdm Strength                   | $4.13 \times 10^{-2}$ | 0.51    | $1.02 \times 10^2$ |
| ADC wav HHL glcm Idmn                  | CD200um ngtdm Strength                   | $4.14 \times 10^{-2}$ | -0.51   | $1.02 \times 10^2$ |
| ADC wav LLH gldm LDHGLE                | CD150um ngtdm Strength                   | $4.14 \times 10^{-2}$ | 0.51    | $1.02 \times 10^2$ |
| ADC lbp 3D m1 gldm SDLGLE              | CD200um ngtdm Strength                   | $4.17 \times 10^{-2}$ | 0.51    | $1.01 \times 10^2$ |
| ADC firstorder Minimum                 | MEAN ODSum HaralickDifferenceVariance F9 | $4.18 \times 10^{-2}$ | 0.51    | $1.01 \times 10^2$ |
| ADC wav LHL glcm ClusterShade          | CD150um ngtdm Strength                   | $4.18 \times 10^{-2}$ | -0.51   | $1.00 \times 10^2$ |
| ADC wav HLH gldm SDLGLE                | MEAN ODSum HaralickDifferenceVariance F9 | $4.19 \times 10^{-2}$ | 0.509   | $1.00 \times 10^2$ |
| ADC wav LLL firstorder Maximum         | CD100um ngtdm Strength                   | $4.19 \times 10^{-2}$ | 0.509   | $1.00 \times 10^2$ |
| ADC wav LLL gldm LDHGLE                | CD150um wav HH ngtdm Strength            | $4.22 \times 10^{-2}$ | 0.509   | $9.92 \times 10^1$ |
| ADC wav LHL firstorder Median          | MEAN ODSum HaralickDifferenceVariance F9 | $4.22 \times 10^{-2}$ | 0.509   | $9.90 \times 10^1$ |
| ADC wav LLL gldm LDHGLE                | CD50um wav HL glcm ClusterShade          | $4.22 \times 10^{-2}$ | 0.509   | $9.88 \times 10^1$ |
| ADC wav HLH firstorder Mean            | CD200um wav HH glcm JointAverage         | $4.23 \times 10^{-2}$ | -0.509  | $9.84 \times 10^1$ |
| ADC wav HLH gldm DependenceVariance    | CD100um glrlm RunVariance                | $4.23 \times 10^{-2}$ | 0.509   | $9.83 \times 10^1$ |
| ADC wav LLL firstorder Minimum         | MEAN ODSum HaralickDifferenceVariance F9 | $4.24 \times 10^{-2}$ | 0.509   | $9.79 \times 10^1$ |
| ADC lbp 2D gldm LDLGLE                 | CD100um lbp 2D gldm DependenceEntropy    | $4.24 \times 10^{-2}$ | -0.509  | $9.78 \times 10^1$ |
| ADC glcm DifferenceAverage             | MEAN ODSum Haralick IMOC2 F12            | $4.25 \times 10^{-2}$ | -0.508  | $9.72 \times 10^1$ |
| ADC wav HHH glszm LAHGLE               | MEAN Cytoplasm HematoxylinODMin          | $4.25 \times 10^{-2}$ | -0.508  | $9.71 \times 10^1$ |
| ADC wav LHH glcm Idm                   | CD150um lbp 2D glrlm RunVariance         | $4.25 \times 10^{-2}$ | 0.508   | $9.71 \times 10^1$ |

| Radiomic feature name               | Pathomic feature name                    | $\rho$                | Q-value | BF                 |
|-------------------------------------|------------------------------------------|-----------------------|---------|--------------------|
| ADC lbp 2D glszm ZoneVariance       | MEAN Nucleus EosinODSum                  | $4.25 \times 10^{-2}$ | 0.508   | $9.69 \times 10^1$ |
| ADC lbp 3D m1 glcm Correlation      | MEAN ODSum Haralick ASM F0               | $4.25 \times 10^{-2}$ | -0.508  | $9.69 \times 10^1$ |
| ADC wav HHH ngtdm Strength          | MEAN ODSum HaralickDifferenceVariance F9 | $4.29 \times 10^{-2}$ | 0.508   | $9.59 \times 10^1$ |
| ADC lbp 3D m1 glszm HGLZE           | CD200um wav LL firstorder Kurtosis       | $4.29 \times 10^{-2}$ | -0.508  | $9.58 \times 10^1$ |
| ADC lbp 3D k glcm Correlation       | CD150um lbp 2D glcm Idm                  | $4.29 \times 10^{-2}$ | -0.508  | $9.56 \times 10^1$ |
| ADC wav LHH ngtdm Strength          | CD150um ngtdm Strength                   | $4.35 \times 10^{-2}$ | 0.507   | $9.42 \times 10^1$ |
| ADC wav HLH gldm DependenceVariance | CD100um lbp 2D glszm ZoneVariance        | $4.35 \times 10^{-2}$ | 0.507   | $9.41 \times 10^1$ |
| ADC wav HHL glszm LAHGLE            | MEAN ODSum Haralick IMOC2 F12            | $4.38 \times 10^{-2}$ | -0.507  | $9.27 \times 10^1$ |
| ADC wav HLL gldm LDHGLE             | CD200um wav HH glcm JointAverage         | $4.38 \times 10^{-2}$ | 0.507   | $9.25 \times 10^1$ |
| ADC wav HLH ngtdm Contrast          | CD150um ngtdm Strength                   | $4.38 \times 10^{-2}$ | 0.507   | $9.24 \times 10^1$ |
| ADC wav LLL gldm LDHGLE             | CD200um wav HH glcm JointAverage         | $4.38 \times 10^{-2}$ | 0.507   | $9.24 \times 10^1$ |
| ADC wav LLH ngtdm Contrast          | CD150um ngtdm Strength                   | $4.38 \times 10^{-2}$ | 0.507   | $9.23 \times 10^1$ |
| ADC wav HHH glrlm LRHGLE            | CD150um ngtdm Strength                   | $4.38 \times 10^{-2}$ | 0.507   | $9.22 \times 10^1$ |
| ADC wav LLL ngtdm Contrast          | CD150um ngtdm Strength                   | $4.38 \times 10^{-2}$ | 0.507   | $9.21 \times 10^1$ |
| ADC wav HHH ngtdm Contrast          | CD150um ngtdm Strength                   | $4.38 \times 10^{-2}$ | 0.507   | $9.21 \times 10^1$ |
| ADC wav LHL ngtdm Contrast          | CD150um ngtdm Strength                   | $4.38 \times 10^{-2}$ | 0.507   | $9.21 \times 10^1$ |
| ADC wav LHH ngtdm Contrast          | CD150um ngtdm Strength                   | $4.38 \times 10^{-2}$ | 0.507   | $9.20 \times 10^1$ |
| ADC wav LHH ngtdm Coarseness        | CD100um lbp 2D firstorder Uniformity     | $4.39 \times 10^{-2}$ | 0.507   | $9.18 \times 10^1$ |
| ADC wav HLL ngtdm Contrast          | CD150um ngtdm Strength                   | $4.43 \times 10^{-2}$ | 0.506   | $9.09 \times 10^1$ |
| ADC wav LHH gldm LDHGLE             | CD100um ngtdm Strength                   | $4.46 \times 10^{-2}$ | 0.506   | $9.02 \times 10^1$ |
| ADC lbp 3D m2 firstorder Kurtosis   | MEAN Nucleus HematoxylinODSum            | $4.47 \times 10^{-2}$ | 0.506   | $8.97 \times 10^1$ |
| ADC wav HLH glcm ClusterShade       | MEAN ODSum HaralickDifferenceVariance F9 | $4.47 \times 10^{-2}$ | -0.506  | $8.95 \times 10^1$ |
| ADC wav LHH glcm ClusterShade       | CD150um ngtdm Strength                   | $4.47 \times 10^{-2}$ | 0.506   | $8.95 \times 10^1$ |
| ADC wav HLH gldm DependenceVariance | CD150um lbp 2D glrlm RunVariance         | $4.50 \times 10^{-2}$ | 0.506   | $8.89 \times 10^1$ |
| ADC wav HLL ngtdm Strength          | CD150um wav HH glcm ClusterProminence    | $4.50 \times 10^{-2}$ | 0.506   | $8.88 \times 10^1$ |
| ADC lbp 3D m2 glcm SumEntropy       | CD200um ngtdm Strength                   | $4.51 \times 10^{-2}$ | -0.505  | $8.85 \times 10^1$ |
| ADC wav HHH glcm ClusterShade       | CD150um ngtdm Strength                   | $4.60 \times 10^{-2}$ | 0.505   | $8.67 \times 10^1$ |
| ADC wav LHL firstorder Median       | CD150um ngtdm Strength                   | $4.69 \times 10^{-2}$ | 0.504   | $8.50 \times 10^1$ |
| ADC wav LLH glcm ClusterShade       | CD150um ngtdm Strength                   | $4.69 \times 10^{-2}$ | -0.504  | $8.49 \times 10^1$ |
| ADC wav HLH firstorder Range        | CD50um wav HL glcm ClusterShade          | $4.70 \times 10^{-2}$ | 0.504   | $8.45 \times 10^1$ |
| ADC lbp 3D m2 firstorder Median     | CD200um wav HL firstorder Median         | $4.70 \times 10^{-2}$ | -0.504  | $8.43 \times 10^1$ |

| Radiomic feature name                             | Pathomic feature name                        | $\rho$                | Q-value | BF                 |
|---------------------------------------------------|----------------------------------------------|-----------------------|---------|--------------------|
| ADC lbp 3D k firstorder 10Percentile              | CD200um ngtdm Strength                       | $4.70 \times 10^{-2}$ | 0.504   | $8.43 \times 10^1$ |
| ADC wav HHH glszm SizeZoneNonUniformityNormalized | CD50um wav HL glcm ClusterShade              | $4.70 \times 10^{-2}$ | 0.504   | $8.43 \times 10^1$ |
| ADC wav HLL firstorder TotalEnergy                | CD50um glcm DifferenceAverage                | $4.70 \times 10^{-2}$ | 0.504   | $8.41 \times 10^1$ |
| ADC wav LLH glcm InverseVariance                  | CD150um lbp 2D glrlm RunVariance             | $4.70 \times 10^{-2}$ | 0.504   | $8.41 \times 10^1$ |
| ADC wav HLL firstorder Mean                       | CD150um ngtdm Strength                       | $4.71 \times 10^{-2}$ | 0.504   | $8.38 \times 10^1$ |
| ADC lbp 3D m2 glszm LGLZE                         | MEAN ODSum Haralick ASM F0                   | $4.73 \times 10^{-2}$ | 0.503   | $8.33 \times 10^1$ |
| ADC wav LLL gldm LDHGLE                           | CD50um glcm DifferenceAverage                | $4.73 \times 10^{-2}$ | 0.503   | $8.32 \times 10^1$ |
| ADC wav LLL firstorder Maximum                    | MEAN ODSum Haralick IMOC2 F12                | $4.74 \times 10^{-2}$ | -0.503  | $8.29 \times 10^1$ |
| ADC wav HLL ngtdm Strength                        | CD50um ngtdm Complexity                      | $4.75 \times 10^{-2}$ | 0.503   | $8.27 \times 10^1$ |
| ADC wav HLL firstorder TotalEnergy                | CD50um ngtdm Complexity                      | $4.76 \times 10^{-2}$ | 0.503   | $8.24 \times 10^1$ |
| ADC wav HLL firstorder Maximum                    | CD200um wav HH firstorder InterquartileRange | $4.78 \times 10^{-2}$ | 0.503   | $8.20 \times 10^1$ |
| ADC wav LHL firstorder Mean                       | MEAN ODSum HaralickDifferenceVariance F9     | $4.81 \times 10^{-2}$ | 0.503   | $8.13 \times 10^1$ |
| ADC firstorder TotalEnergy                        | CD200um wav HL firstorder 90Percentile       | $4.83 \times 10^{-2}$ | 0.502   | $8.08 \times 10^1$ |
| ADC wav LLH firstorder 90Percentile               | CD150um ngtdm Strength                       | $4.85 \times 10^{-2}$ | 0.502   | $8.05 \times 10^1$ |
| ADC wav HHH gldm SDLGLE                           | CD200um wav LH glcm ClusterShade             | $4.86 \times 10^{-2}$ | -0.502  | $8.02 \times 10^1$ |
| ADC wav HLL glcm ClusterProminence                | CD200um wav HL ngtdm Strength                | $4.87 \times 10^{-2}$ | 0.502   | $8.00 \times 10^1$ |
| ADC wav LLL gldm LDHGLE                           | CD50um ngtdm Complexity                      | $4.88 \times 10^{-2}$ | 0.502   | $7.97 \times 10^1$ |
| ADC lbp 3D k firstorder 10Percentile              | MEAN ODSum Haralick IMOC2 F12                | $4.88 \times 10^{-2}$ | -0.502  | $7.95 \times 10^1$ |
| ADC lbp 3D m2 glrlm SRLGLE                        | MEAN ODSum Haralick ASM F0                   | $4.94 \times 10^{-2}$ | 0.502   | $7.85 \times 10^1$ |
| ADC wav HLL ngtdm Complexity                      | CD50um glcm DifferenceAverage                | $4.95 \times 10^{-2}$ | 0.501   | $7.83 \times 10^1$ |
| ADC wav LHL firstorder Mean                       | CD150um ngtdm Strength                       | $4.99 \times 10^{-2}$ | 0.501   | $7.75 \times 10^1$ |
| ADC wav LLH firstorder Mean                       | MEAN ODSum Haralick IMOC2 F12                | $4.99 \times 10^{-2}$ | -0.501  | $7.75 \times 10^1$ |
| ADC wav HLH gldm SDLGLE                           | CD50um wav LL glcm Imc2                      | $4.99 \times 10^{-2}$ | -0.501  | $7.75 \times 10^1$ |
| ADC wav LLH glrlm LRHGLE                          | MEAN ODSum HaralickDifferenceVariance F9     | $4.99 \times 10^{-2}$ | 0.501   | $7.73 \times 10^1$ |

**Table S10** Summary of the significantly correlated radiomic-pathomic features, with radiomic features extracted from T1C. Abbreviations: T1C = post-contrast T1; LDLGLE = Large Dependence Low Gray Level Emphasis; LDHGLE = Large Dependence High Gray Level Emphasis; SDLGLE = Small Dependence Low Gray Level Emphasis; LALGLE = Large Area Low Gray Level Emphasis; GLNUN = Gray level non uniformity normalized; ASM = Angular Second Moment; IMOC = Information Measure of Correlation; glcm = gray level co-occurrence matrix; gldm = Gray

Level Dependence Matrix; glszm = Gray Level Size Zone Matrix; ngtdm = Neighbouring Gray Tone Difference Matrix; glrlm = Gray Level Run Length Matrix; wav = wavelet; lbp = local binary pattern; L = Low-pass filter; H = High-pass filter.

| Radiomic feature name                 | Pathomic feature name          | $\rho$                | Q-value | BF                 |
|---------------------------------------|--------------------------------|-----------------------|---------|--------------------|
| T1C wav HHL glcm ClusterProminence    | CD200um wav HL gldm LDLGLE     | $3.45 \times 10^{-6}$ | 0.788   | $3.79 \times 10^8$ |
| T1C wav HHH gldm LDHGLE               | CD200um wav HL gldm LDLGLE     | $7.00 \times 10^{-6}$ | 0.774   | $9.79 \times 10^7$ |
| T1C wav HHH glcm ClusterShade         | CD200um wav HL gldm LDLGLE     | $1.31 \times 10^{-5}$ | -0.762  | $3.61 \times 10^7$ |
| T1C wav HHL gldm LDHGLE               | CD200um wav HL gldm LDLGLE     | $4.03 \times 10^{-5}$ | 0.744   | $9.25 \times 10^6$ |
| T1C wav HHL gldm SDLGLE               | CD200um ngtdm Strength         | $5.19 \times 10^{-4}$ | 0.703   | $5.54 \times 10^5$ |
| T1C wav HHL gldm LowGrayLevelEmphasis | CD200um ngtdm Strength         | $5.19 \times 10^{-4}$ | 0.702   | $5.16 \times 10^5$ |
| T1C wav LLH ngtdm Contrast            | CD200um ngtdm Strength         | $5.19 \times 10^{-4}$ | 0.7     | $4.61 \times 10^5$ |
| T1C wav LHL gldm SDLGLE               | CD200um ngtdm Strength         | $7.96 \times 10^{-4}$ | 0.692   | $2.69 \times 10^5$ |
| T1C wav LLH gldm DependenceVariance   | CD200um lbp 2D ngtdm Busyness  | $8.39 \times 10^{-4}$ | 0.689   | $2.28 \times 10^5$ |
| T1C wav LLH gldm SDLGLE               | CD200um ngtdm Strength         | $1.02 \times 10^{-3}$ | 0.683   | $1.65 \times 10^5$ |
| T1C wav LLL gldm SDLGLE               | MEAN ODSum Haralick IMOC2 F12  | $1.02 \times 10^{-3}$ | -0.682  | $1.57 \times 10^5$ |
| T1C wav LLH gldm DependenceVariance   | CD150um wav HL glcm Imc2       | $1.27 \times 10^{-3}$ | -0.677  | $1.17 \times 10^5$ |
| T1C wav LLL gldm SDLGLE               | MEAN ODSum HaralickASM F0      | $1.62 \times 10^{-3}$ | 0.672   | $8.57 \times 10^4$ |
| T1C wav LLL gldm SDLGLE               | CD200um ngtdm Strength         | $1.65 \times 10^{-3}$ | 0.67    | $7.83 \times 10^4$ |
| T1C wav LLH ngtdm Contrast            | CD100um ngtdm Strength         | $1.80 \times 10^{-3}$ | 0.667   | $6.74 \times 10^4$ |
| T1C wav LHL gldm SDLGLE               | MEAN ODSum Haralick IMOC2 F12  | $2.06 \times 10^{-3}$ | -0.664  | $5.56 \times 10^4$ |
| T1C wav LLH gldm DependenceVariance   | CD50um ngtdm Busyness          | $2.28 \times 10^{-3}$ | 0.661   | $4.74 \times 10^4$ |
| T1C wav HHL glrlm LRHGLE              | CD200um wav HL gldm LDLGLE     | $2.28 \times 10^{-3}$ | 0.66    | $4.52 \times 10^4$ |
| T1C wav LLH gldm DependenceVariance   | CD200um wav LL glcm Imc2       | $2.34 \times 10^{-3}$ | -0.658  | $4.18 \times 10^4$ |
| T1C firstorder Kurtosis               | CD50um wav LH glcm Imc2        | $2.39 \times 10^{-3}$ | -0.657  | $3.90 \times 10^4$ |
| T1C wav HHL gldm SDLGLE               | MEAN ODSum Haralick IMOC2 F12  | $2.75 \times 10^{-3}$ | -0.653  | $3.25 \times 10^4$ |
| T1C firstorder RootMeanSquared        | CD50um ngtdm Busyness          | $2.75 \times 10^{-3}$ | -0.652  | $3.09 \times 10^4$ |
| T1C wav LLH gldm DependenceVariance   | CD200um firstorder TotalEnergy | $2.75 \times 10^{-3}$ | 0.651   | $2.90 \times 10^4$ |
| T1C firstorder Kurtosis               | CD50um wav HL glcm Imc2        | $2.75 \times 10^{-3}$ | -0.651  | $2.87 \times 10^4$ |
| T1C wav LHL gldm SDLGLE               | MEAN ODSum HaralickASM F0      | $2.78 \times 10^{-3}$ | 0.65    | $2.73 \times 10^4$ |
| T1C wav LLH gldm DependenceVariance   | CD50um wav HH glcm Imc2        | $3.13 \times 10^{-3}$ | -0.647  | $2.35 \times 10^4$ |
| T1C wav LHH gldm SDLGLE               | MEAN ODSum Haralick IMOC2 F12  | $3.70 \times 10^{-3}$ | -0.643  | $1.90 \times 10^4$ |
| T1C wav HHL gldm LowGrayLevelEmphasis | MEAN ODSum Haralick IMOC2 F12  | $3.70 \times 10^{-3}$ | -0.642  | $1.87 \times 10^4$ |
| T1C wav LLL firstorder 10Percentile   | CD50um ngtdm Busyness          | $3.90 \times 10^{-3}$ | -0.641  | $1.72 \times 10^4$ |

| Radiomic feature name                 | Pathomic feature name         | $\rho$                | Q-value | BF                 |
|---------------------------------------|-------------------------------|-----------------------|---------|--------------------|
| T1C wav HLH gldm SDLGLE               | MEAN ODSum Haralick IMOC2 F12 | $4.06 \times 10^{-3}$ | -0.639  | $1.60 \times 10^4$ |
| T1C firstorder Kurtosis               | CD50um wav HH glcm Imc2       | $4.13 \times 10^{-3}$ | -0.638  | $1.51 \times 10^4$ |
| T1C wav HLH glrlm SRLGLE              | MEAN ODSum Haralick IMOC2 F12 | $4.13 \times 10^{-3}$ | -0.638  | $1.48 \times 10^4$ |
| T1C lbp 3D m1 glcm DifferenceEntropy  | CD200um ngtdm Strength        | $5.11 \times 10^{-3}$ | -0.633  | $1.17 \times 10^4$ |
| T1C wav HLH gldm SDLGLE               | CD200um ngtdm Strength        | $5.63 \times 10^{-3}$ | 0.63    | $1.04 \times 10^4$ |
| T1C wav HHL gldm SDLGLE               | MEAN ODSum HaralickASM F0     | $6.12 \times 10^{-3}$ | 0.628   | $9.34 \times 10^3$ |
| T1C lbp 3D m1 glcm SumEntropy         | CD200um ngtdm Strength        | $6.50 \times 10^{-3}$ | -0.626  | $8.59 \times 10^3$ |
| T1C wav LLH glcm MaximumProbability   | CD150um wav HL glcm Imc2      | $6.63 \times 10^{-3}$ | -0.625  | $8.05 \times 10^3$ |
| T1C wav HHL gldm LowGrayLevelEmphasis | MEAN ODSum HaralickASM F0     | $6.63 \times 10^{-3}$ | 0.624   | $7.90 \times 10^3$ |
| T1C wav LLH glcm MaximumProbability   | CD50um wav HH glcm Imc2       | $6.63 \times 10^{-3}$ | -0.624  | $7.81 \times 10^3$ |
| T1C wav LLH gldm DependenceVariance   | CD200um glcm Imc2             | $6.85 \times 10^{-3}$ | -0.623  | $7.39 \times 10^3$ |
| T1C firstorder RootMeanSquared        | CD200um glcm Imc2             | $7.38 \times 10^{-3}$ | 0.621   | $6.73 \times 10^3$ |
| T1C wav LLH gldm DependenceVariance   | CD50um wav HL glcm Imc2       | $7.50 \times 10^{-3}$ | -0.62   | $6.47 \times 10^3$ |
| T1C wav HLL gldm LDLGLE               | MEAN ODSum Haralick IMOC2 F12 | $7.62 \times 10^{-3}$ | -0.619  | $6.23 \times 10^3$ |
| T1C wav HLH glrlm SRLGLE              | CD200um ngtdm Strength        | $9.09 \times 10^{-3}$ | 0.615   | $5.16 \times 10^3$ |
| T1C firstorder RootMeanSquared        | CD200um wav LL glcm Imc2      | $9.29 \times 10^{-3}$ | 0.614   | $4.95 \times 10^3$ |
| T1C wav LLH glcm MaximumProbability   | CD200um lbp 2D ngtdm Busyness | $1.01 \times 10^{-2}$ | 0.612   | $4.46 \times 10^3$ |
| T1C wav LLH gldm SDLGLE               | MEAN ODSum HaralickASM F0     | $1.08 \times 10^{-2}$ | 0.61    | $4.13 \times 10^3$ |
| T1C wav LHH gldm DependenceVariance   | CD200um glcm Imc2             | $1.08 \times 10^{-2}$ | -0.609  | $4.04 \times 10^3$ |
| T1C firstorder Kurtosis               | CD150um wav HL glcm Imc2      | $1.12 \times 10^{-2}$ | -0.608  | $3.79 \times 10^3$ |
| T1C wav LLH glcm MaximumProbability   | CD50um wav HL glcm Imc2       | $1.12 \times 10^{-2}$ | -0.608  | $3.75 \times 10^3$ |
| T1C wav HLH glrlm SRLGLE              | MEAN ODSum HaralickASM F0     | $1.14 \times 10^{-2}$ | 0.607   | $3.61 \times 10^3$ |
| T1C wav LLL firstorder 90Percentile   | CD50um ngtdm Busyness         | $1.16 \times 10^{-2}$ | -0.606  | $3.50 \times 10^3$ |
| T1C wav LLH gldm DependenceVariance   | CD50um wav LH glcm Imc2       | $1.19 \times 10^{-2}$ | -0.605  | $3.35 \times 10^3$ |
| T1C wav HHL gldm LowGrayLevelEmphasis | CD100um ngtdm Strength        | $1.29 \times 10^{-2}$ | 0.603   | $3.05 \times 10^3$ |
| T1C wav LHL firstorder Median         | CD100um ngtdm Strength        | $1.37 \times 10^{-2}$ | -0.601  | $2.82 \times 10^3$ |
| T1C lbp 2D glcm DifferenceEntropy     | CD200um ngtdm Strength        | $1.39 \times 10^{-2}$ | -0.6    | $2.70 \times 10^3$ |
| T1C wav HHL gldm SDLGLE               | CD100um ngtdm Strength        | $1.39 \times 10^{-2}$ | 0.6     | $2.70 \times 10^3$ |
| T1C wav LHH gldm SDLGLE               | MEAN ODSum HaralickASM F0     | $1.47 \times 10^{-2}$ | 0.598   | $2.46 \times 10^3$ |



| Radiomic feature name                | Pathomic feature name                 | $\rho$                | Q-value | BF                 |
|--------------------------------------|---------------------------------------|-----------------------|---------|--------------------|
| T1C wav LLH glcm MaximumProbability  | CD50um wav LH glcm Imc2               | $1.47 \times 10^{-2}$ | -0.598  | $2.43 \times 10^3$ |
| T1C firstorder RootMeanSquared       | CD200um lbp 2D ngtdm Busyness         | $1.47 \times 10^{-2}$ | -0.597  | $2.42 \times 10^3$ |
| T1C wav LLL firstorder 10Percentile  | CD200um lbp 2D ngtdm Busyness         | $1.47 \times 10^{-2}$ | -0.597  | $2.40 \times 10^3$ |
| T1C wav LLH glcm MaximumProbability  | CD200um firstorder TotalEnergy        | $1.53 \times 10^{-2}$ | 0.596   | $2.27 \times 10^3$ |
| T1C wav HLL gldm SDLGLE              | CD200um ngtdm Strength                | $1.58 \times 10^{-2}$ | 0.595   | $2.18 \times 10^3$ |
| T1C wav LHH gldm DependenceVariance  | CD200um wav LL glcm Imc2              | $1.62 \times 10^{-2}$ | -0.594  | $2.10 \times 10^3$ |
| T1C wav HHH ngtdm Strength           | CD50um wav HH firstorder Uniformity   | $1.62 \times 10^{-2}$ | 0.594   | $2.05 \times 10^3$ |
| T1C wav LLH gldm SDLGLE              | MEAN ODSum Haralick IMOC2 F12         | $1.77 \times 10^{-2}$ | -0.591  | $1.85 \times 10^3$ |
| T1C wav LHH glszm GLNUN              | CD200um lbp 2D ngtdm Busyness         | $1.77 \times 10^{-2}$ | 0.591   | $1.84 \times 10^3$ |
| T1C glcm MaximumProbability          | MEAN ODSum Haralick IMOC2 F12         | $1.80 \times 10^{-2}$ | -0.59   | $1.78 \times 10^3$ |
| T1C wav LLH gldm DependenceVariance  | CD200um wav HL firstorder TotalEnergy | $1.83 \times 10^{-2}$ | 0.589   | $1.73 \times 10^3$ |
| T1C lbp 3D m2 glcm SumEntropy        | CD200um ngtdm Strength                | $1.92 \times 10^{-2}$ | -0.588  | $1.63 \times 10^3$ |
| T1C wav HHH firstorder Kurtosis      | CD200um wav HL gldm LDLGLE            | $2.03 \times 10^{-2}$ | 0.586   | $1.53 \times 10^3$ |
| T1C wav LLL firstorder 10Percentile  | CD200um glcm Imc2                     | $2.04 \times 10^{-2}$ | 0.586   | $1.50 \times 10^3$ |
| T1C lbp 3D m1 firstorder Uniformity  | CD200um ngtdm Strength                | $2.07 \times 10^{-2}$ | 0.585   | $1.46 \times 10^3$ |
| T1C wav HLL gldm LDLGLE              | MEAN ODSum HaralickASM F0             | $2.10 \times 10^{-2}$ | 0.585   | $1.43 \times 10^3$ |
| T1C wav LHH glcm MaximumProbability  | CD200um lbp 2D ngtdm Busyness         | $2.17 \times 10^{-2}$ | 0.583   | $1.36 \times 10^3$ |
| T1C lbp 2D glcm SumEntropy           | CD200um ngtdm Strength                | $2.22 \times 10^{-2}$ | -0.583  | $1.32 \times 10^3$ |
| T1C wav HHH ngtdm Strength           | CD150um glcm JointEnergy              | $2.29 \times 10^{-2}$ | 0.582   | $1.26 \times 10^3$ |
| T1C lbp 3D m2 glcm DifferenceEntropy | CD200um ngtdm Strength                | $2.42 \times 10^{-2}$ | -0.58   | $1.19 \times 10^3$ |
| T1C wav LLL firstorder 10Percentile  | CD100um ngtdm Busyness                | $2.42 \times 10^{-2}$ | -0.58   | $1.17 \times 10^3$ |
| T1C wav LLL firstorder 90Percentile  | CD200um wav LL glcm Imc2              | $2.48 \times 10^{-2}$ | 0.579   | $1.13 \times 10^3$ |
| T1C wav LLL firstorder 10Percentile  | CD200um wav LL glcm Imc2              | $2.62 \times 10^{-2}$ | 0.577   | $1.06 \times 10^3$ |
| T1C wav LLL firstorder Minimum       | CD200um ngtdm Strength                | $2.72 \times 10^{-2}$ | 0.576   | $9.97 \times 10^2$ |
| T1C wav HLH gldm SDLGLE              | MEAN ODSum HaralickASM F0             | $2.72 \times 10^{-2}$ | 0.575   | $9.83 \times 10^2$ |
| T1C wav LHL gldm SDLGLE              | CD100um ngtdm Strength                | $2.72 \times 10^{-2}$ | 0.575   | $9.83 \times 10^2$ |
| T1C lbp 2D gldm SDHGLE               | CD200um ngtdm Strength                | $2.72 \times 10^{-2}$ | -0.575  | $9.78 \times 10^2$ |
| T1C wav LLL firstorder 90Percentile  | CD200um glcm Imc2                     | $2.75 \times 10^{-2}$ | 0.574   | $9.58 \times 10^2$ |
| T1C wav LHH gldm DependenceVariance  | CD200um lbp 2D ngtdm Busyness         | $2.80 \times 10^{-2}$ | 0.574   | $9.33 \times 10^2$ |
| T1C wav LLL firstorder 10Percentile  | CD200um ngtdm Strength                | $2.83 \times 10^{-2}$ | 0.573   | $9.13 \times 10^2$ |
| T1C wav HHH firstorder Skewness      | MEAN Delaunay MaxTriangleArea         | $2.88 \times 10^{-2}$ | -0.572  | $8.84 \times 10^2$ |

| Radiomic feature name                 | Pathomic feature name                 | $\rho$                | Q-value | BF                 |
|---------------------------------------|---------------------------------------|-----------------------|---------|--------------------|
| T1C wav HHH glcm MaximumProbability   | CD200um lbp 2D ngtdm Busyness         | $2.88 \times 10^{-2}$ | 0.572   | $8.74 \times 10^2$ |
| T1C wav HHH ngtdm Strength            | CD100um lbp 2D glcm SumEntropy        | $2.88 \times 10^{-2}$ | -0.572  | $8.70 \times 10^2$ |
| T1C glcm MaximumProbability           | CD200um ngtdm Strength                | $2.89 \times 10^{-2}$ | 0.572   | $8.59 \times 10^2$ |
| T1C wav HHH ngtdm Strength            | CD50um wav LL ngtdm Busyness          | $2.90 \times 10^{-2}$ | 0.571   | $8.46 \times 10^2$ |
| T1C glrlm SRLGLE                      | CD200um ngtdm Strength                | $2.99 \times 10^{-2}$ | 0.57    | $8.15 \times 10^2$ |
| T1C firstorder RootMeanSquared        | CD100um ngtdm Busyness                | $3.15 \times 10^{-2}$ | -0.569  | $7.69 \times 10^2$ |
| T1C wav LLH firstorder Kurtosis       | CD50um ngtdm Busyness                 | $3.18 \times 10^{-2}$ | 0.568   | $7.51 \times 10^2$ |
| T1C wav LHH gldm DependenceVariance   | CD50um ngtdm Busyness                 | $3.18 \times 10^{-2}$ | 0.568   | $7.45 \times 10^2$ |
| T1C wav LHH glszm GLNUN               | CD200um firstorder TotalEnergy        | $3.23 \times 10^{-2}$ | 0.567   | $7.28 \times 10^2$ |
| T1C wav LHH glszm GLNUN               | CD150um wav HL glcm Imc2              | $3.28 \times 10^{-2}$ | -0.567  | $7.10 \times 10^2$ |
| T1C wav LLH ngtdm Contrast            | CD150um ngtdm Strength                | $3.43 \times 10^{-2}$ | 0.565   | $6.74 \times 10^2$ |
| T1C wav LLL glcm ClusterShade         | CD50um wav HL glcm ClusterShade       | $3.46 \times 10^{-2}$ | 0.565   | $6.63 \times 10^2$ |
| T1C wav HLL gldm DependenceVariance   | CD150um wav HL glcm Imc2              | $3.49 \times 10^{-2}$ | -0.564  | $6.52 \times 10^2$ |
| T1C wav LLH glcm MaximumProbability   | CD50um ngtdm Busyness                 | $3.56 \times 10^{-2}$ | 0.564   | $6.34 \times 10^2$ |
| T1C wav LLH firstorder Median         | CD100um ngtdm Strength                | $3.56 \times 10^{-2}$ | -0.563  | $6.23 \times 10^2$ |
| T1C firstorder RootMeanSquared        | CD150um wav HL glcm Imc2              | $3.56 \times 10^{-2}$ | 0.563   | $6.22 \times 10^2$ |
| T1C wav HHH ngtdm Strength            | CD200um wav HL gldm LDLGLE            | $3.57 \times 10^{-2}$ | 0.563   | $6.15 \times 10^2$ |
| T1C lbp 3D m1 glszm GrayLevelVariance | CD200um ngtdm Strength                | $3.67 \times 10^{-2}$ | -0.562  | $5.94 \times 10^2$ |
| T1C glrlm SRLGLE                      | MEAN ODSum Haralick IMOC2 F12         | $3.74 \times 10^{-2}$ | -0.561  | $5.78 \times 10^2$ |
| T1C firstorder Minimum                | CD200um ngtdm Strength                | $3.76 \times 10^{-2}$ | 0.561   | $5.70 \times 10^2$ |
| T1C wav HLH glcm Idmn                 | CD200um ngtdm Strength                | $3.76 \times 10^{-2}$ | -0.561  | $5.66 \times 10^2$ |
| T1C lbp 3D k firstorder Maximum       | CD200um wav LH glcm ClusterShade      | $3.81 \times 10^{-2}$ | 0.56    | $5.48 \times 10^2$ |
| T1C wav LHH glcm MaximumProbability   | CD200um firstorder TotalEnergy        | $3.81 \times 10^{-2}$ | 0.56    | $5.46 \times 10^2$ |
| T1C wav LHH glcm MaximumProbability   | CD50um ngtdm Busyness                 | $3.81 \times 10^{-2}$ | 0.559   | $5.44 \times 10^2$ |
| T1C wav HHH firstorder Median         | CD50um glcm ClusterProminence         | $3.99 \times 10^{-2}$ | -0.558  | $5.18 \times 10^2$ |
| T1C wav LLL glcm ClusterShade         | CD200um wav HL glcm ClusterProminence | $4.23 \times 10^{-2}$ | 0.556   | $4.86 \times 10^2$ |
| T1C wav LLH firstorder Kurtosis       | CD200um lbp 2D ngtdm Busyness         | $4.23 \times 10^{-2}$ | 0.556   | $4.78 \times 10^2$ |
| T1C wav LLH glszm SALGLE              | CD200um ngtdm Strength                | $4.23 \times 10^{-2}$ | 0.556   | $4.77 \times 10^2$ |
| T1C wav LHH glszm GLNUN               | CD50um ngtdm Busyness                 | $4.24 \times 10^{-2}$ | 0.556   | $4.73 \times 10^2$ |

| Radiomic feature name               | Pathomic feature name         | $\rho$                | Q-value | BF                 |
|-------------------------------------|-------------------------------|-----------------------|---------|--------------------|
| T1C lbp 3D m2 glszm GLNUN           | CD200um ngtdm Strength        | $4.34 \times 10^{-2}$ | 0.555   | $4.59 \times 10^2$ |
| T1C wav LLH glcm Idn                | CD200um ngtdm Strength        | $4.36 \times 10^{-2}$ | -0.554  | $4.54 \times 10^2$ |
| T1C glrlm SRLGLE                    | MEAN ODSum HaralickASM F0     | $4.37 \times 10^{-2}$ | 0.554   | $4.49 \times 10^2$ |
| T1C wav HLL gldm DependenceEntropy  | MEAN ODSum Haralick IMOC2 F12 | $4.43 \times 10^{-2}$ | 0.554   | $4.40 \times 10^2$ |
| T1C wav LLL firstorder 90Percentile | CD200um lbp 2D ngtdm Busyness | $4.45 \times 10^{-2}$ | -0.553  | $4.34 \times 10^2$ |
| T1C lbp 2D glcm DifferenceEntropy   | MEAN ODSum Haralick IMOC2 F12 | $4.51 \times 10^{-2}$ | 0.553   | $4.23 \times 10^2$ |
| T1C wav HHH ngtdm Strength          | CD50um wav HH ngtdm Busyness  | $4.51 \times 10^{-2}$ | 0.553   | $4.22 \times 10^2$ |
| T1C wav LLH ngtdm Contrast          | CD100um lbp 2D gldm SDHGLE    | $4.89 \times 10^{-2}$ | -0.55   | $3.89 \times 10^2$ |
| T1C wav LLL gldm LDLGLE             | MEAN ODSum Haralick IMOC2 F12 | $4.91 \times 10^{-2}$ | -0.55   | $3.85 \times 10^2$ |

## 4.2.2 Factor analysis

The factor analysis resulted in 24, 32, and 27 factors, respectively for ADC, T1C and pathomic. These results were obtained after features with cross-loadings lower than 0.4. These retained 79%, 78% and 76% of the covariation between the original 323 (for ADC), 341 (for T1C) and 332 (for pathomic) features. Hence, the factor solution was deemed to sufficiently represent the original feature-spaces. Factor loadings associated with ADC, T1C and pathomic features were reported in Table S11, S12 and S13, respectively.

Correlation analysis between factor scores revealed significant correlations based on adjusted p-values after FDR correction. Concerning ADC pipeline, 5 significant positive correlations were found. Concerning T1C pipeline, 3 significant correlations were found, of which 2 positive and 1 negative. Radiopathomic associations between factors sorted by  $\rho$  strength are presented in Table S14 and S15.

**Table S11** Factor loadings for the 24 ADC factors. A darker grey in the column cell correspond to a higher loading measuring the association between features and factors. ADC = Apparent Diffusion Coefficient; LALGLE = Large Area Low Gray Level Emphasis; LDLGLE = Large Dependence Low Gray Level Emphasis; LDHGLE = Large Dependence High Gray Level Emphasis; SDLGLE = Small Dependence Low Gray Level Emphasis; LALGLE = Large Area Low Gray Level Emphasis; GLNUN = Gray level non uniformity normalized; SZNU = Size Zone Non-Uniformity; glcm = gray level co-occurrence matrix; gldm = Gray Level Dependence Matrix; glszm = Gray Level Size Zone Matrix; ngtdm = Neighbouring Gray Tone Difference Matrix; glrlm = Gray Level Run Length Matrix; wav = wavelet; lbp = local binary pattern; L = Low-pass filter; H = High-pass filter.

| ADC feature name                  | ADC F1 | ADC F2 | ADC F3 | ADC F4 | ADC F5 | ADC F6 | ADC F7 | ADC F8 | ADC F9 | ADC F10 | ADC F11 | ADC F12 | ADC F13 | ADC F14 | ADC F15 | ADC F16 | ADC F17 | ADC F18 | ADC F19 | ADC F20 | ADC F21 | ADC F22 | ADC F23 | ADC F24 |
|-----------------------------------|--------|--------|--------|--------|--------|--------|--------|--------|--------|---------|---------|---------|---------|---------|---------|---------|---------|---------|---------|---------|---------|---------|---------|---------|
| ADC firstorder Minimum            | 0.774  | -0.016 | -0.02  | -0.028 | 0.059  | 0.041  | -0.063 | -0.053 | -0.081 | -0.104  | 0.014   | -0.018  | 0.015   | 0.023   | 0.013   | -0.056  | -0.015  | 0.008   | -0.072  | -0.012  | 0.01    | -0.02   | -0.001  | -0.051  |
| ADC firstorder Kurtosis           | -0.045 | -0.002 | 0.147  | 0.14   | -0.013 | -0.052 | 0.214  | 0.171  | 0.141  | 0.169   | 0.642   | -0.025  | 0.026   | 0       | -0.021  | -0.063  | -0.153  | 0.052   | 0.033   | 0.039   | 0.033   | 0.146   | 0.002   | 0.019   |
| ADC firstorder 10Percentile       | 0.786  | -0.047 | -0.002 | -0.016 | 0.118  | 0.014  | -0.055 | -0.011 | -0.025 | -0.019  | 0.009   | 0.006   | 0.02    | 0.011   | 0       | -0.065  | -0.019  | 0.015   | -0.033  | 0.001   | 0.032   | 0.011   | -0.006  | -0.035  |
| ADC firstorder InterquartileRange | 0.599  | -0.138 | -0.084 | -0.021 | 0.458  | -0.083 | 0.029  | -0.061 | 0.018  | -0.019  | -0.06   | 0.043   | -0.044  | -0.015  | -0.012  | 0.098   | 0.102   | -0.039  | 0.068   | 0.055   | -0.012  | -0.005  | -0.012  | -0.004  |
| ADC firstorder Median             | 0.775  | -0.062 | -0.01  | -0.017 | 0.176  | 0.004  | -0.053 | -0.016 | -0.015 | -0.022  | -0.003  | 0.011   | 0.02    | 0.004   | -0.004  | -0.055  | -0.006  | 0.012   | -0.024  | 0.004   | 0.037   | 0.013   | -0.011  | -0.042  |
| ADC firstorder Range              | 0.553  | -0.158 | -0.037 | 0.048  | 0.501  | -0.097 | 0.085  | 0.062  | 0.069  | 0.059   | 0.061   | 0.042   | -0.017  | -0.016  | 0.004   | 0.041   | 0.051   | -0.015  | 0.091   | 0.097   | 0.014   | 0.057   | -0.005  | 0.015   |

| ADC feature name                       | ADC F1 | ADC F2 | ADC F3 | ADC F4 | ADC F5 | ADC F6 | ADC F7 | ADC F8 | ADC F9 | ADC F10 | ADC F11 | ADC F12 | ADC F13 | ADC F14 | ADC F15  | ADC F16 | ADC F17 | ADC F18 | ADC F19 | ADC F20 | ADC F21 | ADC F22 | ADC F23 | ADC F24 |
|----------------------------------------|--------|--------|--------|--------|--------|--------|--------|--------|--------|---------|---------|---------|---------|---------|----------|---------|---------|---------|---------|---------|---------|---------|---------|---------|
| ADC firstorder TotalEnergy             | 0.233  | -0.077 | -0.022 | 0.129  | 0.671  | 0.034  | -0.103 | 0.131  | -0.046 | -0.008  | 0.02    | 0.026   | -0.009  | 0.047   | 0.002    | -0.161  | -0.042  | 0.068   | -0.067  | 0.065   | 0.062   | -0.006  | -0.015  | -0.082  |
| ADC gldm LDLGLE                        | 0.009  | 0.794  | -0.048 | -0.058 | 0.027  | 0.03   | -0.011 | 0.001  | 0.01   | -0.02   | -0.04   | 0.015   | 0.008   | -0.004  | 0.029    | 0.028   | -0.003  | -0.018  | 0.076   | 0.006   | 0.006   | -0.005  | -0.007  | -0.017  |
| ADC gldm DependenceEntropy             | -0.244 | -0.26  | -0.099 | 0.379  | 0.433  | -0.056 | 0.172  | 0.264  | 0.121  | 0.028   | -0.026  | 0.063   | -0.113  | -0.019  | 0.006    | 0.086   | 0.064   | -0.069  | 0.101   | 0.056   | 0.02    | 0.053   | 0.051   | -0.005  |
| ADC gldm GLNU                          | -0.119 | 0.559  | 0.152  | 0.23   | -0.064 | 0.037  | 0.088  | 0.399  | -0.028 | 0.106   | 0.165   | -0.003  | 0.003   | -0.043  | -0.036   | 0.005   | -0.009  | 0.051   | -0.05   | -0.047  | -0.034  | -0.012  | -0.002  | -0.047  |
| ADC gldm LDHGLE                        | 0.604  | -0.086 | 0.016  | 0.04   | 0.41   | -0.07  | -0.002 | 0.04   | 0.131  | 0.222   | -0.023  | 0.057   | -0.008  | -0.016  | -0.02    | -0.029  | 0.016   | 0.038   | 0.069   | 0.04    | 0.078   | 0.048   | -0.011  | 0.032   |
| ADC gldm DependenceVariance            | -0.109 | 0.773  | 0.053  | 0.121  | -0.054 | 0.058  | 0.052  | 0.027  | 0.002  | 0.023   | -0.001  | -0.011  | -0.03   | 0.021   | -0.006   | 0.019   | 0.006   | 0.016   | 0.004   | -0.052  | -0.018  | -0.011  | 0.03    | 0.022   |
| ADC ngtdm Busyness                     | -0.024 | 0.794  | -0.035 | -0.047 | 0.01   | 0.051  | 0.007  | 0.039  | -0.012 | -0.032  | -0.039  | -0.004  | 0.022   | -0.017  | 0.036    | 0.033   | 0.002   | -0.006  | 0.055   | -0.013  | 0.018   | -0.013  | 0.006   | -0.019  |
| ADC glcm Imc2                          | 0.032  | -0.794 | -0.006 | 0.016  | -0.027 | -0.029 | 0.001  | -0.083 | 0.001  | 0.003   | 0.006   | -0.001  | -0.021  | 0.022   | -0.011   | -0.029  | -0.004  | 0.014   | -0.052  | 0.009   | -0.011  | 0       | 0.001   | 0.037   |
| ADC glcm InverseVariance               | -0.2   | 0.717  | 0.081  | -0.009 | -0.179 | 0.096  | -0.029 | 0.003  | 0.007  | -0.002  | 0.023   | -0.05   | -0.042  | 0.038   | 0.026    | -0.033  | -0.019  | 0.095   | -0.082  | -0.103  | -0.019  | -0.02   | 0.034   | 0.059   |
| ADC glcm ClusterShade                  | 0.674  | -0.033 | -0.016 | 0.004  | 0.39   | 0.002  | -0.032 | -0.052 | -0.006 | -0.033  | 0.051   | -0.009  | -0.043  | 0.055   | 0.035    | 0.016   | 0.092   | -0.004  | -0.048  | 0.054   | 0.019   | 0.024   | 0.016   | 0.02    |
| ADC glcm Correlation                   | -0.431 | 0.039  | -0.086 | 0.299  | 0.028  | -0.061 | -0.038 | 0.123  | 0.105  | -0.002  | 0.018   | 0.033   | -0.503  | 0.008   | -0.048   | -0.04   | 0.076   | 0.023   | -0.041  | -0.003  | -0.042  | -0.076  | -0.013  | 0.008   |
| ADC glcm DifferenceEntropy             | -0.123 | -0.463 | -0.155 | 0.188  | 0.482  | -0.053 | 0.135  | 0.116  | 0.104  | -0.003  | -0.025  | 0.046   | 0.04    | -0.015  | 0.023    | 0.09    | 0.058   | -0.12   | 0.157   | 0.126   | 0.046   | 0.033   | 0.005   | 0.01    |
| ADC glcm ClusterTendency               | 0.612  | -0.066 | -0.031 | -0.014 | 0.498  | -0.047 | -0.012 | -0.061 | 0.012  | -0.036  | 0.01    | 0.012   | -0.039  | 0.012   | 0.008    | 0.041   | 0.082   | -0.005  | -0.004  | 0.042   | 0.006   | 0.001   | 0.003   | 0.018   |
| ADC glcm DifferenceAverage             | 0.701  | -0.106 | -0.057 | -0.053 | 0.337  | -0.07  | 0.033  | -0.052 | -0.005 | -0.032  | -0.009  | 0.038   | 0.02    | -0.027  | -0.007   | 0.064   | 0.053   | -0.028  | 0.054   | 0.041   | 0.004   | 0.015   | -0.009  | -0.011  |
| ADC glcm Idmn                          | -0.411 | -0.027 | 0.138  | 0.314  | 0.03   | -0.001 | 0.083  | 0.387  | 0.145  | 0.146   | 0.121   | -0.073  | -0.199  | -0.024  | 0.032    | -0.127  | -0.079  | 0.104   | 0.012   | -0.038  | -0.028  | 0.148   | 0.033   | 0.113   |
| ADC glszm GLNUN                        | 0.062  | 0.742  | 0.076  | -0.158 | -0.156 | 0.075  | -0.083 | -0.044 | -0.043 | -0.017  | 0.016   | -0.028  | 0.061   | 0.023   | 0.017    | -0.035  | -0.019  | 0.054   | -0.033  | -0.043  | -0.007  | -0.034  | -0.017  | 0.035   |
| ADC wav LLH firstorder Maximum         | 0.672  | -0.099 | -0.027 | -0.014 | 0.394  | -0.042 | 0.035  | 0.001  | -0.022 | 0.066   | 0.056   | 0.044   | -0.013  | -0.032  | -0.032   | 0.068   | -0.029  | 0.016   | 0.006   | 0.007   | 0.032   | 0.052   | 0.006   | 0.021   |
| ADC wav LLH firstorder 10Percentile    | -0.785 | 0.055  | 0.019  | 0.032  | -0.139 | 0.048  | -0.001 | 0.019  | 0.008  | 0.009   | 0.017   | -0.01   | -0.003  | -0.006  | 0.00E+00 | -0.008  | -0.003  | 0.017   | -0.051  | -0.003  | 0.004   | 0.036   | -0.009  | -0.019  |
| ADC wav LLH firstorder RootMeanSquared | 0.774  | -0.025 | -0.02  | -0.041 | 0.197  | 0.021  | -0.001 | -0.047 | -0.039 | -0.023  | 0.002   | -0.006  | 0       | -0.004  | -0.026   | -0.011  | -0.03   | -0.002  | -0.029  | -0.012  | 0.01    | -0.012  | 0.006   | -0.003  |
| ADC wav LLH firstorder Median          | 0.788  | 0      | -0.029 | -0.051 | 0.028  | 0.07   | 0.01   | -0.058 | -0.043 | -0.028  | 0.011   | -0.03   | 0.008   | 0.002   | -0.043   | -0.009  | -0.042  | -0.019  | -0.06   | -0.009  | -0.002  | -0.02   | 0.012   | -0.008  |
| ADC wav LLH firstorder 90Percentile    | 0.755  | -0.059 | -0.041 | -0.035 | 0.255  | 0.019  | 0.003  | -0.04  | -0.042 | -0.027  | -0.006  | -0.001  | -0.003  | -0.002  | -0.019   | -0.01   | -0.032  | -0.005  | -0.009  | -0.002  | 0.016   | -0.016  | 0.003   | -0.004  |
| ADC wav LLH firstorder Skewness        | -0.109 | 0.131  | 0.086  | 0.202  | 0.027  | 0      | -0.024 | 0.134  | -0.041 | 0.044   | 0.153   | 0.039   | 0.035   | 0.007   | -0.059   | 0.002   | 0.052   | 0.015   | -0.015  | 0.047   | 0.066   | 0.571   | -0.034  | -0.003  |
| ADC wav LLH firstorder Mean            | 0.688  | -0.003 | -0.065 | -0.046 | 0.214  | 0.189  | 0.014  | -0.089 | -0.1   | -0.059  | 0.027   | -0.046  | 0.007   | 0.003   | -0.078   | -0.048  | -0.092  | 0.002   | -0.161  | -0.016  | 0.037   | 0.029   | 0.01    | -0.044  |
| ADC wav LLH gldm LDLGLE                | -0.008 | 0.795  | -0.039 | -0.05  | 0.032  | 0.018  | -0.006 | 0.01   | 0.001  | -0.02   | -0.039  | 0.008   | 0.013   | -0.003  | 0.021    | 0.025   | -0.002  | -0.022  | 0.079   | 0.008   | 0.03    | 0.008   | -0.005  | -0.01   |
| ADC wav LLH gldm DependenceEntropy     | -0.204 | -0.288 | -0.11  | 0.393  | 0.459  | 0.001  | 0.149  | 0.24   | 0.065  | 0.084   | 0.022   | 0.014   | -0.058  | 0.002   | -0.003   | 0.105   | -0.034  | -0.018  | 0.125   | 0.036   | 0.03    | -0.023  | 0.101   | 0.042   |
| ADC wav LLH gldm LDHGLE                | 0.762  | -0.032 | 0.01   | 0.025  | 0.226  | -0.014 | 0.015  | -0.027 | -0.025 | 0.089   | -0.002  | -0.011  | -0.031  | 0.012   | 0.009    | 0.002   | 0.014   | -0.004  | -0.024  | -0.011  | 0.003   | -0.027  | 0.003   | 0.023   |
| ADC wav LLH gldm DependenceVariance    | -0.103 | 0.74   | 0.124  | 0.128  | -0.037 | 0.007  | 0.059  | -0.003 | 0.03   | 0.051   | 0.158   | -0.057  | 0.021   | 0.061   | 0.015    | 0.05    | 0.054   | -0.025  | -0.017  | -0.018  | -0.046  | 0.063   | 0.014   | -0.02   |
| ADC wav LLH gldm SDLGLE                | 0.602  | 0.268  | 0.059  | -0.204 | -0.158 | -0.042 | -0.103 | -0.281 | -0.086 | -0.056  | -0.04   | 0.036   | 0.03    | 0.046   | -0.048   | -0.033  | -0.015  | -0.009  | -0.035  | 0.09    | -0.017  | -0.038  | -0.091  | 0.021   |
| ADC wav LLH ngtdm Busyness             | -0.036 | 0.795  | -0.011 | -0.02  | 0.011  | 0.033  | -0.009 | 0.06   | 0.005  | -0.036  | -0.041  | 0.006   | 0.021   | -0.014  | 0.013    | 0.017   | 0.01    | -0.018  | 0.054   | -0.005  | 0.023   | 0.012   | -0.014  | -0.026  |

| ADC feature name                       | ADC F1 | ADC F2 | ADC F3 | ADC F4 | ADC F5 | ADC F6 | ADC F7 | ADC F8 | ADC F9 | ADC F10 | ADC F11 | ADC F12  | ADC F13 | ADC F14  | ADC F15 | ADC F16 | ADC F17 | ADC F18 | ADC F19 | ADC F20 | ADC F21 | ADC F22 | ADC F23 | ADC F24  |
|----------------------------------------|--------|--------|--------|--------|--------|--------|--------|--------|--------|---------|---------|----------|---------|----------|---------|---------|---------|---------|---------|---------|---------|---------|---------|----------|
| ADC wav LLH ngtdm Strength             | 0.797  | -0.017 | 0.003  | -0.059 | 0.081  | -0.024 | -0.006 | -0.05  | -0.028 | -0.012  | 0.007   | 0.001    | 0       | -0.012   | -0.008  | 0.005   | -0.008  | 0       | -0.002  | -0.011  | -0.001  | -0.004  | 0.006   | 0.002    |
| ADC wav LLH ngtdm Contrast             | 0.799  | 0.008  | 0.022  | -0.037 | -0.094 | -0.015 | 0.001  | -0.011 | -0.016 | -0.017  | 0.001   | -0.001   | 0.007   | 0.002    | 0.001   | -0.003  | 0.004   | -0.009  | 0.005   | -0.007  | -0.003  | -0.005  | 0.005   | -0.001   |
| ADC wav LLH grlm LRHGLE                | 0.779  | -0.018 | 0.002  | -0.026 | 0.189  | -0.001 | -0.009 | -0.033 | -0.033 | 0.01    | -0.005  | -0.005   | -0.006  | 0        | -0.007  | -0.028  | -0.015  | 0.006   | -0.03   | -0.024  | 0.007   | -0.016  | -0.002  | -0.001   |
| ADC wav LLH glcm InverseVariance       | -0.249 | 0.671  | 0.167  | 0.038  | -0.205 | 0.023  | -0.012 | -0.024 | 0.029  | 0.027   | 0.074   | -0.05    | 0.011   | 0.04     | 0.041   | -0.033  | 0.033   | 0.005   | -0.179  | -0.01   | -0.035  | 0.07    | -0.007  | 0.001    |
| ADC wav LLH glcm JointEntropy          | -0.273 | -0.406 | -0.036 | 0.409  | 0.196  | 0.054  | 0.104  | 0.385  | 0.079  | 0.035   | -0.055  | 0.033    | -0.058  | -0.023   | 0.024   | 0.017   | -0.03   | -0.014  | 0.087   | 0.013   | 0.063   | -0.023  | 0.037   | 0.061    |
| ADC wav LLH glcm ClusterShade          | -0.798 | -0.008 | -0.023 | 0.037  | 0.098  | 0.018  | -0.002 | 0.011  | 0.015  | 0.017   | 0       | 0        | -0.007  | -0.002   | -0.001  | 0       | -0.005  | 0.011   | -0.008  | 0.006   | 0.005   | 0.007   | -0.005  | 0.00E+00 |
| ADC wav LLH glcm Correlation           | -0.107 | -0.021 | -0.321 | 0.204  | 0.115  | -0.076 | -0.04  | 0.152  | 0.063  | -0.003  | 0.151   | 0.056    | 0.01    | -0.018   | -0.144  | -0.02   | 0.007   | -0.025  | -0.027  | 0.523   | -0.046  | 0.088   | -0.001  | 0.021    |
| ADC wav LLH glcm DifferenceEntropy     | 0.008  | -0.507 | -0.161 | 0.082  | 0.516  | -0.016 | 0.07   | 0.067  | 0.025  | 0.02    | -0.065  | 0.032    | -0.034  | -0.026   | -0.015  | 0.077   | -0.034  | -0.042  | 0.2     | 0.014   | 0.057   | -0.071  | 0.02    | 0.067    |
| ADC wav LLH glcm SumEntropy            | -0.191 | -0.47  | -0.176 | 0.224  | 0.438  | 0.017  | 0.076  | 0.188  | 0.069  | 0.024   | -0.058  | 0.032    | -0.04   | -0.008   | 0.001   | 0.062   | -0.028  | -0.044  | 0.164   | 0.069   | 0.076   | -0.056  | 0.031   | 0.086    |
| ADC wav LLH glcm MaximumProbability    | 0.075  | 0.779  | 0.006  | -0.142 | -0.039 | 0.003  | -0.023 | -0.089 | -0.019 | -0.008  | -0.009  | 0.003    | 0.012   | 0.033    | 0.023   | 0.01    | 0.02    | -0.006  | 0.025   | 0.029   | -0.01   | 0.012   | -0.02   | -0.026   |
| ADC wav LLH glcm ClusterProminence     | 0.803  | 0.005  | 0.018  | -0.037 | -0.034 | -0.007 | -0.004 | -0.018 | -0.02  | -0.018  | 0.003   | -0.004   | 0.007   | 0.003    | -0.001  | -0.015  | -0.002  | -0.005  | -0.01   | -0.013  | 0       | -0.004  | 0.003   | -0.005   |
| ADC wav LLH glszm LAHGLE               | 0.765  | 0.009  | 0.035  | 0.032  | 0.205  | -0.016 | 0.029  | -0.025 | -0.023 | 0.087   | 0.065   | -0.01    | -0.023  | 0.014    | 0.001   | 0.001   | 0.012   | -0.014  | -0.043  | -0.018  | -0.007  | -0.013  | 0.003   | 0.002    |
| ADC wav HHH firstorder Maximum         | 0.746  | -0.086 | 0.025  | -0.027 | 0.153  | -0.033 | 0.058  | 0.046  | 0.107  | 0.141   | -0.067  | 0        | 0.018   | 0.00E+00 | 0.01    | 0.007   | -0.028  | -0.014  | 0.089   | -0.012  | 0.031   | -0.021  | -0.027  | -0.005   |
| ADC wav HHH firstorder Kurtosis        | -0.076 | -0.08  | 0.018  | 0.157  | -0.028 | -0.098 | 0.046  | 0.177  | 0.29   | 0.563   | -0.054  | 0.002    | 0.114   | -0.067   | 0.032   | -0.059  | 0.046   | 0.044   | 0.047   | 0.067   | 0.121   | 0.11    | 0.017   | -0.014   |
| ADC wav HHH firstorder RootMeanSquared | 0.803  | -0.006 | 0.021  | -0.044 | 0.007  | -0.016 | 0.002  | -0.02  | -0.006 | -0.013  | -0.008  | -0.004   | 0.01    | 0.001    | -0.002  | -0.007  | -0.006  | -0.009  | 0.008   | -0.014  | -0.002  | -0.015  | -0.001  | -0.001   |
| ADC wav HHH firstorder Median          | 0.777  | -0.005 | 0.021  | -0.077 | 0.045  | -0.001 | -0.03  | -0.051 | -0.071 | -0.041  | 0.006   | -0.004   | -0.007  | 0.042    | 0       | -0.018  | -0.064  | -0.025  | -0.023  | 0.017   | -0.06   | -0.021  | 0.008   | 0.027    |
| ADC wav HHH firstorder Skewness        | 0.008  | 0.023  | 0.243  | 0.023  | -0.047 | -0.004 | 0.201  | 0.068  | -0.063 | -0.072  | 0.125   | 0.076    | -0.046  | -0.002   | 0.051   | -0.027  | -0.571  | 0.157   | -0.001  | -0.011  | -0.037  | -0.021  | -0.061  | -0.04    |
| ADC wav HHH firstorder Mean            | -0.652 | -0.017 | 0.004  | -0.025 | 0.237  | 0.052  | 0      | -0.009 | -0.047 | -0.04   | -0.025  | -0.02    | 0.071   | 0.063    | 0.026   | -0.158  | -0.246  | 0.011   | -0.065  | 0.009   | 0.036   | -0.008  | -0.106  | -0.013   |
| ADC wav HHH gldm LDLGLE                | -0.023 | 0.796  | -0.045 | -0.041 | 0.032  | 0.024  | -0.007 | 0.008  | 0.002  | -0.021  | -0.04   | 0.013    | 0.006   | -0.013   | 0.007   | 0.024   | -0.003  | -0.026  | 0.07    | 0.019   | 0.027   | 0.002   | -0.007  | -0.009   |
| ADC wav HHH gldm DependenceEntropy     | -0.076 | -0.378 | 0.102  | 0.254  | 0.498  | -0.012 | 0.154  | 0.213  | 0.144  | 0.106   | -0.059  | 0.03     | -0.035  | -0.024   | 0.084   | 0.114   | -0.004  | -0.073  | 0.149   | -0.03   | 0       | -0.034  | 0.017   | 0.022    |
| ADC wav HHH gldm LDHGLE                | 0.645  | -0.059 | 0.029  | 0.106  | 0.153  | -0.048 | 0.055  | 0.04   | 0.096  | 0.36    | -0.099  | -0.011   | -0.023  | 0.026    | 0.067   | 0.03    | 0.122   | -0.05   | 0.058   | 0.024   | 0.03    | -0.056  | -0.021  | 0.056    |
| ADC wav HHH gldm DependenceVariance    | -0.154 | 0.563  | 0.045  | 0.293  | -0.146 | -0.018 | 0.048  | -0.024 | -0.018 | 0.188   | 0.175   | 0.014    | -0.027  | -0.111   | -0.049  | -0.057  | 0.001   | -0.018  | -0.237  | 0.13    | -0.087  | 0.043   | 0.051   | 0.081    |
| ADC wav HHH ngtdm Strength             | 0.801  | -0.01  | 0.025  | -0.053 | -0.028 | -0.029 | 0.008  | -0.028 | 0.005  | 0.007   | -0.012  | 0.00E+00 | 0.014   | -0.006   | 0       | 0.013   | 0       | -0.005  | 0.027   | -0.012  | 0.001   | -0.012  | -0.004  | -0.003   |
| ADC wav HHH ngtdm Contrast             | 0.799  | 0.008  | 0.022  | -0.037 | -0.095 | -0.015 | 0.001  | -0.011 | -0.016 | -0.017  | 0.001   | -0.001   | 0.007   | 0.002    | 0.001   | -0.003  | 0.004   | -0.009  | 0.005   | -0.007  | -0.003  | -0.005  | 0.005   | -0.001   |
| ADC wav HHH grlm LRHGLE                | 0.796  | -0.022 | 0.014  | -0.029 | 0.085  | -0.015 | 0.011  | -0.013 | 0.034  | 0.036   | -0.029  | -0.006   | 0.01    | 0.005    | 0.008   | -0.009  | 0.029   | -0.017  | 0.019   | -0.008  | 0.016   | -0.018  | -0.009  | 0.003    |
| ADC wav HHH grlm SRLGLE                | 0.061  | 0.762  | -0.053 | -0.091 | -0.046 | -0.005 | -0.05  | -0.116 | -0.065 | -0.051  | -0.036  | 0.015    | -0.011  | -0.001   | -0.07   | -0.029  | -0.015  | -0.019  | 0.017   | 0.089   | -0.004  | -0.027  | -0.046  | 0        |
| ADC wav HHH glcm lmc1                  | -0.534 | 0.153  | -0.031 | 0.358  | -0.247 | 0.122  | -0.025 | 0.257  | 0.019  | -0.049  | 0.071   | -0.03    | -0.045  | -0.019   | -0.023  | -0.078  | -0.013  | -0.027  | -0.145  | 0.009   | 0.089   | 0.016   | 0.065   | 0.082    |
| ADC wav HHH glcm ClusterShade          | 0.798  | 0.008  | 0.023  | -0.038 | -0.101 | -0.016 | 0.002  | -0.01  | -0.015 | -0.017  | 0.001   | -0.001   | 0.007   | 0.002    | 0.001   | -0.002  | 0.004   | -0.01   | 0.007   | -0.006  | -0.004  | -0.006  | 0.005   | -0.001   |
| ADC wav HHH glcm SumEntropy            | 0.016  | -0.503 | 0.042  | -0.044 | 0.491  | -0.009 | 0.091  | 0.107  | 0.131  | 0.01    | -0.123  | 0.007    | 0.032   | 0.039    | 0.073   | 0.115   | 0.001   | -0.061  | 0.231   | -0.079  | 0.01    | -0.043  | -0.027  | -0.001   |
| ADC wav HHH glcm MaximumProbability    | -0.023 | 0.763  | -0.079 | -0.055 | -0.1   | -0.008 | -0.055 | -0.097 | -0.022 | 0.04    | 0.04    | 0.009    | -0.009  | -0.042   | -0.037  | -0.055  | -0.004  | -0.004  | -0.076  | 0.09    | -0.071  | 0.005   | 0.002   | 0.01     |
| ADC wav HHH glcm ldm                   | -0.257 | 0.61   | -0.095 | 0.129  | -0.26  | 0.014  | -0.071 | -0.044 | -0.041 | 0.062   | 0.112   | -0.031   | -0.029  | -0.082   | -0.077  | -0.091  | -0.017  | 0.004   | -0.215  | 0.095   | -0.03   | 0.013   | 0.025   | 0.066    |

| ADC feature name                       | ADC F1 | ADC F2 | ADC F3 | ADC F4 | ADC F5 | ADC F6 | ADC F7 | ADC F8 | ADC F9 | ADC F10 | ADC F11 | ADC F12 | ADC F13 | ADC F14 | ADC F15 | ADC F16 | ADC F17 | ADC F18 | ADC F19 | ADC F20 | ADC F21 | ADC F22 | ADC F23 | ADC F24 |
|----------------------------------------|--------|--------|--------|--------|--------|--------|--------|--------|--------|---------|---------|---------|---------|---------|---------|---------|---------|---------|---------|---------|---------|---------|---------|---------|
| ADC wav HHH glszm LAHGLE               | 0.088  | 0.059  | 0.058  | 0.345  | 0.014  | -0.084 | 0.081  | 0.083  | -0.067 | 0.639   | 0.129   | 0.098   | -0.033  | 0.022   | -0.004  | -0.015  | 0.064   | 0.005   | -0.027  | -0.003  | -0.048  | -0.057  | 0.001   | -0.019  |
| ADC wav HHH glszm SZNUN                | 0.472  | -0.238 | 0.011  | -0.269 | 0.412  | -0.015 | 0.141  | 0.032  | 0.081  | 0.045   | -0.048  | 0.059   | 0.06    | 0.064   | 0.066   | 0.127   | 0.038   | -0.05   | 0.182   | -0.078  | -0.036  | 0.022   | 0.011   | -0.031  |
| ADC wav HHH glszm GLNU                 | -0.159 | -0.119 | 0.042  | 0.333  | -0.062 | 0.017  | 0.099  | 0.668  | -0.041 | 0.015   | 0.023   | 0.039   | -0.043  | 0.018   | -0.018  | -0.032  | -0.002  | 0.051   | -0.018  | 0.076   | 0.004   | 0.014   | -0.032  | -0.036  |
| ADC wav HHH glszm LALGLE               | -0.021 | 0.793  | -0.041 | -0.044 | 0.041  | 0.028  | -0.001 | 0.024  | 0.007  | -0.016  | -0.041  | 0.013   | 0.009   | -0.01   | 0.021   | 0.033   | -0.001  | -0.026  | 0.084   | 0.005   | 0.028   | 0.009   | -0.002  | -0.017  |
| ADC wav HLL firstorder Maximum         | 0.409  | -0.178 | -0.03  | -0.006 | 0.622  | -0.063 | 0.099  | 0.037  | 0.054  | 0.028   | 0.029   | -0.017  | 0.058   | 0.001   | -0.025  | 0.068   | -0.043  | 0.003   | 0.006   | 0.003   | 0.044   | 0.067   | 0.019   | 0.014   |
| ADC wav HLL firstorder 10Percentile    | -0.457 | 0.162  | 0.06   | 0.123  | -0.576 | 0.081  | -0.084 | 0.08   | 0.027  | 0.061   | 0.043   | -0.045  | -0.026  | 0.03    | 0.045   | -0.096  | -0.008  | 0.033   | -0.074  | -0.021  | 0.056   | -0.021  | 0.002   | 0.047   |
| ADC wav HLL firstorder Uniformity      | 0.055  | 0.76   | 0.031  | -0.08  | -0.162 | 0.03   | -0.109 | -0.046 | -0.026 | 0.001   | -0.014  | -0.006  | -0.017  | 0.012   | -0.021  | -0.048  | -0.01   | 0.032   | -0.051  | -0.032  | 0.001   | -0.058  | -0.01   | 0.047   |
| ADC wav HLL firstorder Median          | 0.778  | -0.016 | -0.002 | -0.052 | 0.051  | 0.033  | 0.021  | -0.075 | -0.058 | -0.017  | 0.025   | -0.027  | -0.066  | -0.032  | 0.015   | 0.046   | 0.04    | 0.007   | -0.021  | -0.009  | -0.027  | -0.028  | 0.048   | -0.004  |
| ADC wav HLL firstorder Skewness        | 0.082  | -0.018 | 0.014  | 0.002  | -0.014 | -0.206 | -0.01  | 0.015  | -0.086 | -0.025  | -0.011  | -0.016  | 0.041   | 0.017   | -0.035  | -0.035  | -0.035  | -0.004  | 0.008   | -0.022  | 0.602   | 0.05    | -0.023  | -0.006  |
| ADC wav HLL firstorder Mean            | 0.778  | 0.008  | 0      | 0.012  | -0.07  | 0.028  | -0.014 | -0.039 | -0.015 | -0.007  | 0.04    | -0.025  | -0.03   | 0.003   | 0.054   | 0.033   | 0.085   | 0.017   | -0.046  | 0.025   | 0.084   | 0.002   | 0.021   | 0.01    |
| ADC wav HLL firstorder TotalEnergy     | 0.076  | -0.089 | -0.051 | 0.113  | 0.761  | 0.068  | 0.05   | 0.117  | -0.013 | -0.002  | 0.032   | 0.003   | -0.009  | 0.029   | -0.015  | -0.062  | 0.016   | 0.018   | -0.085  | 0.033   | 0.001   | 0.003   | -0.033  | -0.017  |
| ADC wav HLL gldm LDGLGLE               | 0.261  | 0.735  | 0.001  | -0.133 | -0.03  | -0.012 | -0.022 | -0.095 | -0.042 | -0.022  | -0.021  | 0.033   | 0.014   | 0.01    | 0       | 0.014   | -0.001  | -0.013  | 0.059   | 0.037   | 0.015   | -0.01   | -0.033  | -0.029  |
| ADC wav HLL gldm LDHGLE                | 0.222  | -0.093 | -0.018 | 0.042  | 0.737  | 0.012  | 0.04   | 0.003  | 0.01   | 0.044   | 0.014   | -0.031  | 0.01    | -0.015  | -0.016  | -0.027  | -0.009  | 0.014   | -0.109  | 0.014   | -0.098  | 0.057   | 0.035   | 0.022   |
| ADC wav HLL ngtdm Busyness             | 0.004  | 0.794  | 0.001  | -0.039 | -0.01  | 0.023  | -0.038 | 0.044  | -0.009 | -0.029  | -0.043  | 0.021   | -0.008  | -0.021  | 0.015   | 0.013   | 0.004   | -0.018  | 0.037   | -0.01   | 0.062   | -0.006  | 0.005   | -0.014  |
| ADC wav HLL ngtdm Strength             | 0.565  | -0.105 | -0.063 | -0.129 | 0.49   | -0.055 | 0.034  | -0.166 | -0.015 | -0.038  | -0.011  | 0.027   | 0.033   | -0.013  | -0.013  | 0.096   | 0.031   | 0.01    | 0.008   | 0.002   | -0.058  | 0.036   | -0.01   | -0.012  |
| ADC wav HLL ngtdm Complexity           | 0.146  | -0.063 | -0.054 | -0.012 | 0.769  | 0.051  | -0.018 | -0.068 | -0.022 | -0.033  | 0.011   | -0.014  | 0       | 0       | -0.027  | -0.057  | -0.019  | 0.028   | -0.112  | -0.028  | 0.012   | 0.012   | -0.009  | -0.014  |
| ADC wav HLL ngtdm Contrast             | 0.799  | 0.007  | 0.022  | -0.039 | -0.091 | -0.017 | 0.001  | -0.013 | -0.017 | -0.017  | 0.001   | 0       | 0.007   | 0.001   | 0.001   | -0.001  | 0.004   | -0.009  | 0.005   | -0.007  | -0.004  | -0.004  | 0.004   | -0.002  |
| ADC wav HLL glcm InverseVariance       | -0.187 | 0.728  | -0.018 | 0.056  | -0.164 | 0.059  | -0.089 | 0.011  | 0.016  | 0.015   | 0.001   | -0.016  | -0.037  | 0.012   | 0.004   | -0.042  | -0.033  | 0.035   | -0.081  | -0.044  | -0.026  | -0.048  | 0.009   | 0.084   |
| ADC wav HLL glcm ClusterShade          | 0.02   | 0.056  | 0.046  | 0.041  | -0.771 | -0.041 | 0.016  | 0.065  | 0.031  | 0.034   | 0.006   | 0.005   | -0.003  | 0.039   | 0.046   | 0.062   | 0.065   | -0.014  | 0.106   | 0.071   | 0.049   | 0.028   | 0.02    | -0.003  |
| ADC wav HLL glcm Correlation           | -0.172 | -0.034 | -0.487 | 0.138  | 0.113  | 0.122  | -0.038 | 0.014  | 0.145  | -0.009  | -0.05   | 0.097   | 0.086   | 0.032   | 0.116   | -0.048  | 0.251   | -0.033  | 0.013   | 0.031   | -0.079  | 0.031   | -0.243  | 0.21    |
| ADC wav HLL glcm DifferenceEntropy     | -0.177 | -0.471 | -0.052 | 0.174  | 0.478  | 0.012  | 0.182  | 0.148  | 0.11   | -0.055  | -0.001  | -0.012  | 0.027   | -0.024  | 0.04    | 0.109   | 0.02    | -0.087  | 0.129   | 0.058   | 0.043   | 0.054   | 0.024   | -0.012  |
| ADC wav HLL glcm ClusterProminence     | 0.369  | -0.034 | -0.037 | -0.025 | 0.667  | 0.061  | -0.05  | -0.089 | -0.05  | -0.026  | 0.017   | -0.025  | 0.002   | -0.002  | -0.026  | -0.095  | -0.042  | 0.045   | -0.146  | -0.061  | 0.026   | 0.013   | -0.012  | -0.023  |
| ADC wav HLL glcm Idmn                  | -0.464 | -0.037 | -0.052 | 0.301  | 0.064  | 0.08   | -0.024 | 0.299  | 0.218  | 0.118   | 0.065   | -0.085  | 0.092   | 0.088   | -0.021  | -0.001  | -0.086  | 0.019   | -0.108  | -0.101  | -0.009  | 0.007   | -0.032  | 0.252   |
| ADC wav HLL glszm ZoneVariance         | -0.052 | 0.799  | -0.012 | 0.021  | 0.006  | 0.027  | 0.005  | 0.024  | -0.004 | 0.006   | -0.031  | 0.005   | 0.006   | -0.003  | 0.004   | 0.018   | 0.002   | -0.011  | 0.057   | -0.021  | 0.009   | 0.006   | 0.012   | 0.001   |
| ADC wav LHH firstorder Maximum         | 0.775  | -0.058 | 0.008  | -0.006 | 0.127  | -0.008 | 0.042  | 0.009  | 0.035  | 0.102   | -0.036  | -0.006  | -0.013  | 0.016   | 0.007   | 0.03    | 0.006   | -0.024  | 0.069   | -0.001  | 0.014   | -0.041  | -0.018  | 0.02    |
| ADC wav LHH firstorder Minimum         | -0.682 | 0.082  | -0.001 | -0.012 | -0.353 | 0.004  | -0.046 | -0.015 | -0.048 | -0.187  | 0.027   | 0.017   | 0.025   | -0.02   | -0.004  | 0.016   | 0.034   | 0.01    | -0.038  | 0.01    | -0.041  | 0.023   | 0.029   | -0.018  |
| ADC wav LHH firstorder Kurtosis        | -0.022 | -0.04  | 0.048  | 0.213  | 0.11   | -0.004 | 0.167  | 0.125  | 0.175  | 0.647   | 0.111   | -0.05   | -0.071  | 0.055   | 0.011   | 0.097   | -0.035  | -0.01   | 0.047   | 0.002   | 0.062   | 0.012   | -0.068  | 0.025   |
| ADC wav LHH firstorder RootMeanSquared | 0.804  | -0.003 | 0.018  | -0.042 | -0.016 | -0.015 | 0.002  | -0.018 | -0.014 | -0.012  | -0.004  | -0.001  | 0.007   | 0       | -0.002  | -0.004  | -0.001  | -0.009  | 0.008   | -0.009  | -0.002  | -0.01   | 0.001   | -0.003  |
| ADC wav LHH firstorder Median          | -0.8   | -0.007 | -0.018 | 0.043  | 0.074  | 0.018  | -0.004 | 0.014  | 0.014  | 0.017   | -0.004  | 0.003   | -0.005  | 0.005   | -0.003  | 0.007   | -0.006  | 0.001   | 0.002   | 0.011   | 0.003   | 0.008   | -0.005  | 0.004   |

| ADC feature name                    | ADC F1 | ADC F2 | ADC F3 | ADC F4 | ADC F5 | ADC F6 | ADC F7 | ADC F8 | ADC F9 | ADC F10 | ADC F11 | ADC F12 | ADC F13 | ADC F14 | ADC F15 | ADC F16 | ADC F17  | ADC F18 | ADC F19 | ADC F20  | ADC F21 | ADC F22 | ADC F23 | ADC F24 |
|-------------------------------------|--------|--------|--------|--------|--------|--------|--------|--------|--------|---------|---------|---------|---------|---------|---------|---------|----------|---------|---------|----------|---------|---------|---------|---------|
| ADC wav LHH firstorder Mean         | -0.8   | -0.012 | -0.029 | 0.027  | 0.024  | -0.004 | 0.012  | 0.014  | 0.014  | 0.026   | -0.013  | 0.007   | 0.001   | -0.015  | -0.004  | 0.039   | 0.00E+00 | -0.005  | 0.032   | 0.017    | -0.009  | 0.004   | -0.013  | -0.006  |
| ADC wav LHH gldm LDLGLE             | -0.022 | 0.796  | -0.043 | -0.045 | 0.032  | 0.03   | -0.009 | 0.009  | 0.008  | -0.02   | -0.04   | 0.018   | 0.01    | -0.01   | 0.015   | 0.026   | -0.001   | -0.023  | 0.072   | 0.011    | 0.022   | 0       | -0.003  | -0.01   |
| ADC wav LHH gldm DependenceEntropy  | -0.121 | -0.337 | 0.047  | 0.36   | 0.469  | 0.012  | 0.17   | 0.247  | 0.119  | 0.116   | -0.031  | 0.008   | -0.017  | -0.061  | 0.032   | 0.067   | 0.014    | -0.047  | 0.142   | 0.022    | 0       | -0.001  | 0.031   | 0.007   |
| ADC wav LHH gldm LDHGLE             | 0.659  | -0.03  | 0.008  | 0.097  | 0.229  | 0.005  | 0.058  | 0.005  | -0.001 | 0.344   | -0.025  | -0.018  | -0.057  | 0.05    | 0.027   | -0.01   | 0.017    | -0.012  | -0.005  | -0.018   | 0.038   | -0.061  | -0.05   | 0.04    |
| ADC wav LHH gldm DependenceVariance | -0.12  | 0.702  | 0.066  | 0.211  | -0.075 | 0.001  | 0.11   | 0.017  | 0.075  | 0.059   | 0.152   | 0.016   | -0.01   | -0.024  | -0.006  | -0.002  | 0.039    | 0.003   | -0.138  | 0.04     | -0.084  | 0.053   | 0.055   | 0.017   |
| ADC wav LHH gldm SDLGLE             | 0.407  | 0.151  | -0.027 | -0.231 | -0.22  | 0.062  | -0.223 | -0.352 | -0.058 | -0.061  | 0.003   | 0.104   | 0.089   | 0.073   | -0.029  | -0.057  | 0.009    | 0.047   | -0.12   | 0.08     | -0.161  | -0.168  | -0.031  | 0.057   |
| ADC wav LHH ngtdm Strength          | 0.803  | -0.008 | 0.02   | -0.051 | -0.004 | -0.02  | 0.006  | -0.03  | -0.008 | 0.003   | -0.003  | -0.001  | 0.003   | 0.001   | -0.002  | 0.004   | 0        | -0.006  | 0.015   | -0.008   | -0.001  | -0.007  | 0       | -0.004  |
| ADC wav LHH ngtdm Coarseness        | -0.13  | -0.025 | 0.046  | -0.382 | -0.142 | -0.104 | -0.163 | -0.541 | -0.136 | -0.021  | -0.034  | 0.006   | 0.06    | 0.139   | -0.044  | -0.086  | -0.012   | 0.051   | -0.054  | 0.155    | -0.112  | -0.087  | -0.154  | -0.027  |
| ADC wav LHH ngtdm Contrast          | 0.798  | 0.008  | 0.022  | -0.037 | -0.095 | -0.015 | 0.001  | -0.011 | -0.016 | -0.017  | 0.001   | -0.001  | 0.007   | 0.002   | 0.001   | -0.003  | 0.004    | -0.009  | 0.005   | -0.007   | -0.003  | -0.005  | 0.005   | -0.001  |
| ADC wav LHH gldm ClusterShade       | 0.798  | 0.008  | 0.022  | -0.037 | -0.098 | -0.016 | 0.001  | -0.011 | -0.016 | -0.017  | 0.001   | -0.001  | 0.007   | 0.002   | 0.001   | -0.002  | 0.005    | -0.01   | 0.005   | -0.006   | -0.003  | -0.005  | 0.005   | -0.001  |
| ADC wav LHH gldm SumEntropy         | -0.038 | -0.542 | -0.024 | 0.049  | 0.493  | -0.013 | 0.074  | 0.116  | 0.055  | 0.035   | -0.101  | 0.005   | 0.035   | -0.021  | 0.032   | 0.062   | -0.017   | -0.071  | 0.224   | -0.01    | 0.042   | -0.049  | -0.018  | 0.019   |
| ADC wav LHH gldm MaximumProbability | 0.007  | 0.796  | -0.032 | -0.075 | -0.049 | 0.012  | -0.013 | -0.051 | 0.018  | -0.004  | 0.016   | 0.011   | -0.001  | 0       | 0.009   | 0.003   | 0.006    | 0.001   | -0.019  | 0.025    | -0.023  | 0.016   | 0.007   | -0.001  |
| ADC wav LHH gldm Idm                | -0.238 | 0.69   | -0.03  | 0.08   | -0.21  | 0.041  | -0.03  | -0.009 | 0.046  | 0.011   | 0.093   | -0.012  | -0.033  | -0.009  | -0.038  | -0.032  | 0.004    | 0.04    | -0.191  | 0.024    | -0.057  | 0.028   | 0.027   | 0.046   |
| ADC wav LHH gldm LAHGLE             | 0.273  | 0.091  | 0.138  | 0.228  | 0.094  | -0.028 | 0.179  | 0.045  | -0.019 | 0.41    | 0.438   | 0.024   | -0.063  | 0.107   | -0.039  | 0.051   | 0.063    | -0.061  | -0.052  | -0.051   | -0.016  | -0.099  | -0.077  | -0.097  |
| ADC wav LHH gldm LALGLE             | -0.021 | 0.793  | -0.041 | -0.045 | 0.041  | 0.028  | -0.001 | 0.024  | 0.007  | -0.016  | -0.041  | 0.012   | 0.009   | -0.01   | 0.021   | 0.033   | -0.001   | -0.026  | 0.084   | 0.004    | 0.028   | 0.009   | -0.002  | -0.017  |
| ADC wav HHL firstorder Maximum      | 0.643  | -0.154 | -0.007 | -0.089 | 0.296  | -0.078 | 0.076  | 0.095  | 0.136  | 0.054   | -0.076  | 0.022   | 0.066   | -0.021  | 0.042   | 0.056   | 0.114    | 0.038   | 0.081   | 0.085    | 0.036   | 0.06    | -0.073  | -0.092  |
| ADC wav HHL firstorder Kurtosis     | -0.136 | -0.129 | -0.014 | 0.005  | -0.047 | -0.016 | 0.185  | 0.17   | 0.271  | 0.408   | -0.115  | -0.14   | 0.057   | 0.078   | 0.062   | 0.101   | -0.039   | 0.288   | 0.023   | 0.112    | 0.114   | 0.081   | -0.156  | -0.086  |
| ADC wav HHL firstorder Median       | 0.449  | 0.013  | -0.078 | -0.013 | -0.323 | -0.159 | 0.057  | 0.004  | -0.033 | -0.03   | -0.001  | 0.15    | 0.081   | -0.154  | -0.073  | 0.348   | 0.009    | -0.07   | -0.002  | -0.032   | -0.07   | -0.153  | 0.017   | 0.052   |
| ADC wav HHL firstorder Skewness     | 0.009  | 0.041  | -0.242 | -0.122 | -0.094 | 0.072  | -0.051 | 0.037  | 0.013  | -0.032  | -0.06   | 0.093   | -0.109  | -0.012  | 0.161   | -0.066  | 0.584    | 0.154   | -0.005  | 0.00E+00 | -0.084  | 0.041   | -0.014  | -0.071  |
| ADC wav HHL firstorder Mean         | -0.795 | -0.005 | -0.026 | 0.034  | -0.033 | -0.012 | -0.004 | 0.028  | 0.043  | 0.012   | -0.002  | 0.028   | -0.007  | -0.012  | 0.007   | 0.057   | 0.069    | -0.01   | 0.025   | 0.02     | -0.02   | -0.019  | -0.011  | 0.015   |
| ADC wav HHL firstorder TotalEnergy  | 0.197  | -0.099 | 0.029  | 0.191  | 0.628  | 0.012  | 0.078  | 0.354  | 0.033  | 0.079   | 0.02    | 0.022   | 0.005   | 0.009   | -0.017  | -0.087  | -0.003   | 0.001   | -0.008  | 0.058    | -0.016  | -0.044  | -0.062  | -0.036  |
| ADC wav HHL ngtdm Busyness          | -0.026 | 0.796  | -0.05  | -0.026 | 0.013  | 0.022  | -0.029 | 0.03   | -0.003 | -0.024  | -0.034  | 0.01    | -0.002  | -0.017  | -0.01   | 0.017   | 0.009    | -0.033  | 0.055   | -0.009   | 0.018   | 0.006   | 0       | -0.024  |
| ADC wav HHL ngtdm Strength          | 0.785  | -0.038 | 0.025  | -0.101 | 0.092  | -0.046 | 0.022  | -0.06  | 0.014  | 0.001   | -0.019  | 0.012   | 0.03    | -0.014  | -0.001  | 0.031   | 0.01     | 0.013   | 0.029   | 0.002    | 0.004   | 0.006   | -0.02   | -0.029  |
| ADC wav HHL gldm InverseVariance    | -0.17  | 0.731  | -0.121 | 0.066  | -0.155 | 0.044  | -0.094 | -0.006 | -0.026 | 0.025   | 0.01    | -0.042  | -0.041  | -0.035  | -0.093  | -0.013  | -0.023   | 0.006   | -0.06   | -0.014   | 0.006   | -0.01   | 0.02    | 0.042   |
| ADC wav HHL gldm ClusterShade       | 0.598  | 0.022  | 0.019  | 0      | -0.474 | -0.033 | 0.02   | 0.025  | 0.029  | -0.015  | -0.026  | 0.006   | 0       | 0.041   | 0.05    | 0.046   | 0.168    | -0.058  | 0.082   | 0.071    | -0.018  | 0.011   | 0.012   | -0.011  |
| ADC wav HHL gldm Correlation        | -0.245 | 0.099  | -0.466 | -0.013 | 0.064  | 0.177  | -0.048 | 0.117  | -0.012 | 0.087   | 0.122   | 0.126   | 0.12    | -0.031  | -0.209  | -0.048  | -0.038   | -0.014  | -0.026  | -0.035   | 0.057   | -0.043  | -0.045  | 0.052   |
| ADC wav HHL gldm SumEntropy         | -0.205 | -0.503 | 0.042  | 0.153  | 0.429  | 0.019  | 0.142  | 0.224  | 0.159  | -0.021  | -0.033  | 0.005   | 0.063   | -0.013  | 0.072   | 0.056   | 0.01     | -0.079  | 0.118   | 0.025    | 0.041   | 0.022   | 0       | 0.022   |
| ADC wav HHL gldm ClusterProminence  | 0.801  | 0.006  | 0.02   | -0.039 | -0.066 | -0.014 | 0      | -0.015 | -0.016 | -0.017  | 0.001   | -0.001  | 0.008   | 0.001   | -0.001  | -0.005  | 0.002    | -0.007  | 0       | -0.009   | -0.001  | -0.004  | 0.003   | -0.003  |
| ADC wav HHL gldm Idm                | -0.473 | -0.084 | -0.051 | 0.171  | 0.041  | 0.049  | 0.092  | 0.348  | 0.239  | 0.215   | 0.008   | -0.087  | 0.048   | 0.082   | 0.094   | 0.09    | -0.057   | 0.175   | -0.057  | 0.025    | 0.08    | 0.123   | -0.032  | -0.022  |
| ADC wav HHL gldm LAHGLE             | 0.697  | -0.056 | 0.041  | -0.035 | 0.319  | -0.012 | 0.048  | 0.027  | 0.091  | 0.105   | -0.015  | -0.033  | 0.035   | -0.01   | -0.034  | -0.011  | -0.111   | 0.041   | 0.03    | 0.003    | 0.049   | -0.009  | -0.041  | -0.022  |
| ADC wav HHL gldm ZoneVariance       | -0.024 | 0.794  | -0.042 | -0.036 | 0.037  | 0.028  | -0.001 | 0.022  | 0.005  | -0.014  | -0.04   | 0.012   | 0.006   | -0.011  | 0.018   | 0.03    | -0.001   | -0.026  | 0.082   | 0.004    | 0.027   | 0.007   | 0       | -0.016  |

| ADC feature name                       | ADC F1 | ADC F2 | ADC F3 | ADC F4 | ADC F5 | ADC F6 | ADC F7 | ADC F8 | ADC F9 | ADC F10 | ADC F11 | ADC F12 | ADC F13 | ADC F14 | ADC F15 | ADC F16 | ADC F17 | ADC F18 | ADC F19 | ADC F20 | ADC F21 | ADC F22 | ADC F23 | ADC F24 |
|----------------------------------------|--------|--------|--------|--------|--------|--------|--------|--------|--------|---------|---------|---------|---------|---------|---------|---------|---------|---------|---------|---------|---------|---------|---------|---------|
| ADC wav HHL glszm SALGLE               | 0.398  | 0.596  | -0.064 | -0.173 | -0.103 | -0.03  | -0.11  | -0.186 | -0.074 | -0.03   | -0.027  | -0.009  | 0.018   | 0.028   | -0.086  | -0.03   | 0.013   | -0.045  | 0.021   | 0.058   | -0.053  | -0.034  | -0.094  | -0.035  |
| ADC wav HLH firstorder Maximum         | 0.574  | -0.147 | 0      | 0.025  | 0.47   | -0.014 | 0.069  | 0.013  | 0.007  | 0.203   | -0.036  | -0.01   | 0.008   | -0.004  | 0.091   | 0.016   | -0.009  | -0.015  | 0.04    | -0.053  | -0.018  | 0.006   | 0.039   | 0.018   |
| ADC wav HLH firstorder Kurtosis        | -0.137 | 0.008  | 0.003  | 0.209  | -0.081 | -0.115 | -0.006 | 0.101  | 0.072  | 0.551   | 0.063   | -0.062  | 0.073   | -0.107  | 0.124   | -0.119  | -0.105  | -0.043  | -0.085  | -0.044  | -0.227  | 0.148   | 0.161   | 0.037   |
| ADC wav HLH firstorder RootMeanSquared | 0.79   | -0.016 | 0.014  | -0.042 | 0.133  | -0.006 | 0      | -0.041 | -0.024 | -0.012  | -0.009  | -0.006  | 0.019   | 0.001   | -0.012  | -0.01   | -0.018  | 0.005   | -0.011  | -0.028  | 0.004   | -0.007  | -0.005  | -0.008  |
| ADC wav HLH firstorder Median          | 0.668  | 0.038  | 0.024  | 0.098  | -0.335 | -0.046 | 0.028  | 0.041  | 0.086  | -0.014  | -0.053  | -0.059  | 0.1     | 0.006   | -0.055  | 0.136   | 0.019   | -0.008  | 0.045   | 0.037   | 0.032   | 0.008   | -0.009  | -0.015  |
| ADC wav HLH firstorder Skewness        | -0.086 | 0.054  | 0.184  | 0.031  | 0.01   | 0.236  | 0.076  | -0.07  | -0.068 | 0.192   | -0.066  | -0.027  | 0.056   | 0.072   | 0.511   | -0.032  | 0.058   | 0.059   | 0.018   | -0.077  | -0.096  | -0.047  | 0.016   | 0.048   |
| ADC wav HLH firstorder Range           | 0.608  | -0.15  | -0.028 | 0.002  | 0.44   | -0.046 | 0.067  | 0.036  | 0.022  | 0.188   | -0.039  | 0.017   | 0.005   | -0.014  | 0.026   | 0.016   | -0.047  | -0.015  | 0.066   | -0.052  | -0.02   | 0.004   | 0.026   | 0.017   |
| ADC wav HLH firstorder Mean            | 0.004  | 0.099  | 0.195  | 0.215  | -0.477 | 0.07   | 0.054  | -0.001 | 0.009  | 0.111   | -0.118  | -0.119  | 0.265   | 0.091   | -0.08   | 0.075   | -0.095  | 0.079   | -0.018  | 0.005   | 0.188   | 0.087   | -0.102  | -0.13   |
| ADC wav HLH gldm LDLGLE                | -0.018 | 0.796  | -0.036 | -0.047 | 0.029  | 0.025  | -0.008 | 0.004  | 0.002  | -0.022  | -0.04   | 0.017   | 0.008   | -0.012  | 0.015   | 0.024   | -0.004  | -0.025  | 0.065   | 0.022   | 0.031   | -0.001  | -0.008  | -0.006  |
| ADC wav HLH gldm DependenceEntropy     | -0.141 | -0.35  | 0.017  | 0.354  | 0.485  | -0.021 | 0.199  | 0.198  | 0.091  | 0.079   | -0.012  | 0.011   | -0.032  | 0.02    | 0.048   | 0.099   | -0.024  | -0.02   | 0.135   | -0.038  | -0.017  | -0.015  | 0.039   | 0.042   |
| ADC wav HLH gldm LDHGLE                | 0.504  | -0.067 | -0.003 | 0.198  | 0.245  | -0.086 | 0.078  | 0.097  | 0.019  | 0.488   | -0.046  | 0.046   | -0.029  | -0.001  | -0.01   | -0.036  | -0.049  | -0.008  | 0.034   | -0.034  | -0.034  | -0.046  | 0.009   | 0.06    |
| ADC wav HLH gldm DependenceVariance    | -0.132 | 0.671  | 0.136  | 0.223  | -0.088 | -0.037 | 0.103  | 0.032  | 0.026  | 0.127   | 0.126   | -0.039  | 0.009   | -0.023  | 0.032   | -0.033  | -0.008  | -0.05   | -0.143  | 0.024   | -0.087  | 0.072   | 0.035   | 0.039   |
| ADC wav HLH gldm SDLGLE                | 0.526  | 0.163  | 0.132  | -0.253 | -0.182 | -0.028 | -0.089 | -0.316 | -0.096 | -0.079  | -0.029  | 0.088   | 0.065   | 0.042   | 0.031   | -0.049  | 0.008   | 0.032   | -0.11   | 0.132   | 0.05    | -0.112  | -0.09   | 0.067   |
| ADC wav HLH ngtdm Strength             | 0.796  | -0.021 | 0.01   | -0.073 | 0.054  | -0.031 | 0.001  | -0.059 | -0.026 | 0.004   | -0.004  | 0.001   | 0.012   | -0.001  | 0.004   | 0.001   | -0.013  | 0.005   | 0.016   | -0.028  | -0.027  | -0.009  | 0.001   | -0.003  |
| ADC wav HLH ngtdm Complexity           | 0.593  | -0.034 | -0.018 | -0.029 | 0.51   | 0.043  | -0.026 | -0.061 | -0.035 | -0.007  | -0.001  | -0.022  | 0.005   | 0.004   | -0.023  | -0.087  | -0.049  | 0.023   | -0.088  | -0.059  | 0.017   | -0.015  | -0.009  | -0.015  |
| ADC wav HLH ngtdm Contrast             | 0.799  | 0.007  | 0.022  | -0.038 | -0.093 | -0.015 | 0.001  | -0.012 | -0.016 | -0.017  | 0.001   | -0.001  | 0.007   | 0.002   | 0.001   | -0.003  | 0.004   | -0.009  | 0.005   | -0.007  | -0.003  | -0.005  | 0.004   | -0.002  |
| ADC wav HLH glrlm SRLGLE               | 0.248  | 0.648  | 0.031  | -0.165 | -0.108 | 0.002  | -0.087 | -0.211 | -0.066 | -0.072  | -0.039  | 0.061   | 0.037   | 0.005   | -0.009  | -0.031  | -0.002  | -0.003  | -0.055  | 0.126   | 0.048   | -0.088  | -0.081  | 0.053   |
| ADC wav HLH glmc1                      | -0.462 | 0.149  | 0.051  | 0.399  | -0.239 | 0.116  | -0.007 | 0.344  | 0.11   | -0.005  | 0.043   | -0.02   | -0.059  | -0.038  | 0.016   | -0.08   | -0.015  | -0.022  | -0.115  | 0.009   | 0.054   | 0.01    | 0.057   | 0.064   |
| ADC wav HLH glmc JointEntropy          | -0.225 | -0.523 | -0.026 | 0.245  | 0.306  | 0.075  | 0.11   | 0.279  | 0.099  | -0.033  | -0.063  | 0.015   | -0.026  | 0.038   | 0.027   | 0.093   | 0.001   | -0.045  | 0.166   | -0.031  | 0.08    | -0.026  | 0.014   | 0.043   |
| ADC wav HLH glmc ClusterShade          | -0.782 | -0.01  | -0.026 | 0.041  | 0.175  | 0.034  | -0.008 | 0.001  | 0.007  | 0.026   | -0.002  | -0.005  | -0.009  | 0.003   | 0       | -0.02   | -0.012  | 0.018   | -0.029  | -0.002  | 0.01    | 0.006   | -0.008  | -0.006  |
| ADC wav HLH glmc Correlation           | -0.151 | -0.023 | -0.301 | 0.269  | 0.113  | 0.194  | -0.132 | 0.133  | 0.022  | 0.015   | -0.012  | 0.25    | -0.019  | -0.175  | -0.135  | 0.073   | -0.012  | -0.15   | 0.026   | 0.108   | -0.05   | -0.131  | -0.065  | 0.198   |
| ADC wav HLH glmc SumEntropy            | -0.067 | -0.527 | -0.07  | 0.05   | 0.51   | 0.03   | 0.102  | 0.077  | 0.057  | -0.019  | -0.078  | 0.031   | 0.022   | 0.03    | 0.018   | 0.127   | -0.001  | -0.04   | 0.204   | -0.048  | 0.035   | -0.025  | -0.009  | 0.028   |
| ADC wav HLH glmc Idm                   | -0.246 | 0.669  | -0.009 | 0.099  | -0.222 | -0.002 | -0.046 | 0.022  | 0.037  | 0.074   | 0.083   | -0.043  | -0.012  | -0.036  | 0.042   | -0.099  | -0.025  | 0.004   | -0.184  | 0.036   | -0.064  | 0.026   | 0.035   | 0.053   |
| ADC wav HLH glszm LAHGLE               | 0.18   | 0.081  | 0.086  | 0.323  | 0.079  | -0.068 | 0.168  | 0.075  | -0.045 | 0.587   | 0.23    | 0.065   | -0.057  | 0.051   | -0.033  | -0.004  | 0.041   | -0.027  | -0.04   | -0.05   | -0.045  | -0.094  | -0.027  | -0.026  |
| ADC wav HLH glszm GrayLevelVariance    | 0.801  | -0.008 | 0.013  | -0.042 | 0.058  | -0.009 | -0.002 | -0.029 | -0.021 | -0.013  | -0.001  | -0.003  | 0.007   | 0.001   | -0.004  | -0.014  | -0.008  | -0.002  | -0.008  | -0.021  | -0.004  | -0.009  | 0.002   | -0.002  |
| ADC wav HLH glszm SZNUN                | 0.405  | -0.347 | -0.02  | -0.323 | 0.352  | -0.033 | 0.107  | -0.065 | -0.055 | -0.019  | -0.096  | 0.087   | 0.027   | 0.1     | -0.034  | 0.166   | 0.014   | -0.055  | 0.158   | -0.043  | 0.062   | 0.032   | -0.068  | -0.041  |
| ADC wav HLH glszm ZoneEntropy          | -0.08  | -0.408 | -0.012 | 0.338  | 0.472  | -0.036 | 0.152  | 0.192  | 0.086  | 0.093   | 0.016   | -0.012  | -0.005  | -0.02   | 0.056   | 0.057   | -0.03   | 0.025   | 0.139   | -0.074  | -0.065  | -0.015  | 0.067   | 0.023   |
| ADC wav HLH glszm LALGLE               | -0.021 | 0.793  | -0.041 | -0.044 | 0.041  | 0.027  | -0.001 | 0.023  | 0.007  | -0.016  | -0.041  | 0.013   | 0.008   | -0.01   | 0.021   | 0.032   | -0.001  | -0.026  | 0.083   | 0.005   | 0.029   | 0.009   | -0.002  | -0.017  |
| ADC wav LHL firstorder Maximum         | 0.73   | -0.092 | 0.031  | -0.024 | 0.243  | -0.031 | 0.065  | 0.043  | 0.093  | 0.029   | 0.04    | 0.008   | 0.052   | -0.03   | 0.023   | 0.042   | -0.014  | 0.001   | 0.018   | 0.04    | 0.024   | 0.06    | -0.055  | -0.032  |



| ADC feature name                       | ADC F1 | ADC F2 | ADC F3 | ADC F4 | ADC F5 | ADC F6 | ADC F7 | ADC F8 | ADC F9 | ADC F10 | ADC F11 | ADC F12 | ADC F13 | ADC F14 | ADC F15  | ADC F16 | ADC F17 | ADC F18 | ADC F19 | ADC F20  | ADC F21 | ADC F22 | ADC F23 | ADC F24 |
|----------------------------------------|--------|--------|--------|--------|--------|--------|--------|--------|--------|---------|---------|---------|---------|---------|----------|---------|---------|---------|---------|----------|---------|---------|---------|---------|
| ADC wav LHL firstorder RootMeanSquared | 0.795  | -0.028 | 0      | -0.051 | 0.11   | -0.021 | 0.016  | -0.018 | -0.009 | -0.021  | 0.005   | 0.004   | 0.017   | -0.011  | 0.004    | 0.002   | 0.006   | -0.001  | 0.003   | 0.002    | 0.002   | -0.001  | -0.009  | -0.007  |
| ADC wav LHL firstorder Median          | 0.798  | 0.006  | 0.004  | -0.046 | -0.075 | -0.02  | 0.015  | -0.005 | -0.033 | -0.023  | 0.013   | -0.013  | 0.003   | 0.006   | 0.001    | 0.005   | -0.01   | 0.002   | -0.012  | -0.024   | -0.014  | -0.014  | 0.02    | 0.02    |
| ADC wav LHL firstorder Skewness        | -0.159 | -0.011 | 0.152  | 0.056  | -0.037 | -0.199 | 0.048  | -0.123 | 0.207  | 0.082   | 0.16    | 0.191   | 0.114   | 0.03    | 0.099    | 0.1     | -0.205  | 0.028   | 0.024   | 0.011    | 0.148   | 0.13    | -0.364  | -0.044  |
| ADC wav LHL firstorder Mean            | 0.797  | 0.01   | 0.003  | -0.041 | -0.087 | -0.027 | 0.01   | -0.009 | -0.026 | -0.026  | 0.02    | -0.002  | 0.011   | 0.003   | 0.001    | 0.011   | -0.014  | 0.008   | -0.018  | -0.026   | -0.004  | -0.008  | 0.004   | 0.02    |
| ADC wav LHL gldm LDLGLE                | 0.1    | 0.78   | -0.055 | -0.078 | 0      | 0.015  | -0.02  | -0.039 | -0.016 | -0.034  | -0.052  | 0.032   | 0.014   | 0.02    | 0.027    | 0.036   | -0.016  | -0.031  | 0.058   | -0.012   | 0.027   | 0.017   | -0.018  | -0.026  |
| ADC wav LHL gldm LDHGLE                | 0.8    | -0.012 | 0.017  | -0.027 | 0.076  | 0      | 0.007  | -0.006 | -0.007 | -0.012  | 0.006   | -0.017  | 0.006   | 0.003   | 0.005    | -0.012  | 0.017   | -0.012  | -0.022  | 0.005    | -0.007  | 0.009   | 0.005   | 0.002   |
| ADC wav LHL gldm DependenceVariance    | -0.112 | 0.782  | 0.004  | 0.1    | -0.063 | 0.006  | 0.012  | 0.019  | 0.004  | -0.006  | -0.023  | 0.006   | -0.044  | -0.018  | -0.01    | -0.008  | -0.008  | 0.022   | -0.001  | -0.035   | 0.009   | 0.036   | 0.023   | 0.03    |
| ADC wav LHL ngtdm Busyness             | -0.009 | 0.793  | -0.018 | -0.03  | -0.018 | 0.019  | -0.046 | 0.017  | -0.022 | -0.034  | -0.045  | 0.035   | -0.026  | 0.01    | 0.007    | 0.013   | -0.007  | -0.018  | 0.043   | -0.039   | 0.049   | 0.004   | -0.004  | 0.003   |
| ADC wav LHL ngtdm Strength             | 0.787  | -0.034 | 0.005  | -0.08  | 0.123  | -0.03  | 0.02   | -0.055 | -0.011 | -0.017  | 0.005   | 0.008   | 0.017   | -0.028  | -0.004   | 0.018   | 0.007   | 0.001   | 0.01    | 0.00E+00 | -0.002  | 0.008   | -0.016  | -0.015  |
| ADC wav LHL ngtdm Contrast             | 0.798  | 0.008  | 0.022  | -0.037 | -0.095 | -0.015 | 0.001  | -0.011 | -0.016 | -0.017  | 0.001   | -0.001  | 0.007   | 0.002   | 0.001    | -0.003  | 0.005   | -0.009  | 0.005   | -0.007   | -0.003  | -0.005  | 0.005   | -0.001  |
| ADC wav LHL glcm DifferenceVariance    | 0.803  | 0.001  | 0.019  | -0.04  | -0.036 | -0.014 | 0.001  | -0.016 | -0.016 | -0.018  | 0.001   | -0.001  | 0.008   | -0.001  | 0.00E+00 | -0.005  | 0.004   | -0.007  | 0       | -0.007   | -0.002  | -0.003  | 0.002   | -0.003  |
| ADC wav LHL glcm ClusterShade          | -0.8   | -0.007 | -0.021 | 0.037  | 0.084  | 0.013  | 0      | 0.012  | 0.017  | 0.018   | -0.001  | 0.002   | -0.006  | -0.003  | -0.001   | 0.005   | -0.004  | 0.01    | -0.002  | 0.007    | 0.003   | 0.005   | -0.005  | 0.002   |
| ADC wav LHL glcm Correlation           | -0.308 | 0.08   | -0.599 | 0.136  | -0.061 | 0.015  | 0.034  | 0.023  | 0.032  | 0.034   | 0.137   | 0.003   | -0.044  | -0.108  | -0.061   | -0.009  | -0.058  | -0.013  | -0.031  | -0.085   | 0.084   | -0.184  | -0.05   | 0.102   |
| ADC wav LHL glcm SumEntropy            | -0.265 | -0.421 | -0.068 | 0.28   | 0.386  | 0.024  | 0.151  | 0.27   | 0.14   | 0.03    | -0.03   | -0.011  | 0.048   | -0.066  | 0.08     | 0.027   | -0.002  | -0.092  | 0.092   | 0.078    | 0.044   | -0.004  | 0.014   | 0.017   |
| ADC wav LHL glcm Idm                   | -0.164 | 0.754  | -0.062 | -0.009 | -0.139 | 0.047  | -0.082 | -0.004 | -0.003 | -0.009  | -0.001  | -0.028  | -0.06   | 0.028   | -0.053   | -0.013  | -0.007  | 0.04    | -0.045  | -0.065   | -0.01   | 0.013   | 0.013   | 0.036   |
| ADC wav LHL glcm Idmn                  | -0.287 | -0.017 | -0.047 | 0.278  | 0.081  | 0.145  | 0.084  | 0.403  | 0.29   | 0.099   | 0.08    | -0.087  | 0.033   | 0.01    | 0.006    | 0.156   | -0.051  | 0.017   | -0.127  | -0.042   | 0.008   | 0.077   | -0.069  | 0.048   |
| ADC wav LHL glszm SALGLE               | 0.566  | 0.377  | 0.044  | -0.225 | -0.138 | -0.074 | -0.093 | -0.251 | -0.092 | -0.031  | -0.035  | 0.004   | 0.021   | 0.062   | -0.035   | -0.044  | -0.008  | 0.008   | -0.01   | 0.058    | -0.01   | -0.024  | -0.095  | 0.026   |
| ADC wav LLL firstorder Maximum         | 0.716  | -0.098 | -0.041 | 0.03   | 0.335  | -0.019 | 0.007  | 0.005  | -0.012 | -0.032  | 0.052   | 0.013   | -0.005  | 0.009   | 0.01     | -0.022  | 0.015   | 0.004   | -0.001  | 0.048    | 0.023   | 0.019   | -0.004  | -0.027  |
| ADC wav LLL firstorder Minimum         | 0.784  | -0.024 | -0.01  | -0.04  | 0.066  | 0.031  | -0.037 | -0.039 | -0.048 | -0.069  | 0.016   | -0.014  | 0.015   | 0.011   | 0.009    | -0.064  | -0.019  | 0.004   | -0.058  | -0.008   | 0.014   | 0       | -0.005  | -0.055  |
| ADC wav LLL firstorder Kurtosis        | -0.063 | 0.004  | 0.19   | 0.186  | -0.026 | -0.022 | 0.138  | 0.147  | 0.035  | 0.118   | 0.677   | -0.036  | 0.036   | 0.019   | -0.018   | -0.027  | -0.057  | 0.015   | -0.026  | 0.029    | 0       | 0.087   | -0.016  | 0.031   |
| ADC wav LLL firstorder Skewness        | 0.049  | 0.06   | -0.1   | 0.218  | 0.072  | -0.088 | 0.335  | 0.077  | -0.13  | -0.014  | 0.412   | -0.068  | -0.109  | 0.057   | 0.184    | 0.097   | -0.008  | -0.054  | -0.041  | 0.182    | -0.166  | -0.072  | -0.02   | -0.099  |
| ADC wav LLL gldm LDHGLE                | 0.459  | -0.096 | -0.022 | 0.065  | 0.612  | -0.045 | -0.069 | 0.002  | 0.062  | 0.112   | -0.031  | 0.055   | -0.011  | 0.009   | -0.017   | -0.021  | 0.051   | 0.043   | 0.031   | 0.042    | 0.063   | 0.015   | -0.004  | 0.03    |
| ADC wav LLL ngtdm Busyness             | 0.087  | 0.79   | -0.029 | -0.068 | -0.012 | 0.047  | 0.017  | 0.024  | -0.019 | -0.032  | -0.025  | -0.007  | 0.032   | -0.013  | 0.037    | 0.029   | 0.005   | -0.003  | 0.045   | -0.005   | 0.004   | -0.015  | 0.004   | -0.021  |
| ADC wav LLL ngtdm Strength             | 0.395  | -0.132 | -0.053 | -0.005 | 0.57   | -0.145 | 0.012  | -0.139 | 0.057  | -0.043  | 0.074   | 0.048   | -0.126  | 0.005   | -0.005   | 0.146   | 0.166   | -0.03   | 0.084   | 0.108    | -0.015  | -0.006  | 0.011   | 0.022   |
| ADC wav LLL ngtdm Contrast             | 0.799  | 0.008  | 0.022  | -0.037 | -0.094 | -0.016 | 0.001  | -0.011 | -0.016 | -0.017  | 0.001   | -0.001  | 0.007   | 0.002   | 0.001    | -0.002  | 0.005   | -0.009  | 0.005   | -0.007   | -0.003  | -0.005  | 0.004   | -0.001  |
| ADC wav LLL glcm Imc2                  | 0.022  | -0.795 | 0.03   | 0.042  | -0.038 | -0.028 | 0.001  | -0.035 | -0.006 | 0.012   | 0.029   | -0.01   | -0.012  | 0.01    | -0.019   | -0.033  | -0.002  | 0.025   | -0.077  | -0.001   | -0.025  | -0.006  | 0.003   | 0.022   |
| ADC wav LLL glcm InverseVariance       | -0.144 | 0.732  | 0.167  | -0.055 | -0.134 | 0.101  | -0.038 | 0.017  | -0.016 | 0.02    | 0.037   | -0.038  | -0.006  | 0.043   | 0.011    | -0.009  | -0.007  | 0.047   | -0.071  | -0.068   | -0.019  | -0.047  | 0.009   | 0.036   |
| ADC wav LLL glcm Correlation           | -0.529 | 0.044  | 0.088  | 0.207  | 0.028  | -0.072 | -0.043 | 0.138  | 0.081  | 0.02    | 0.028   | 0.004   | -0.475  | -0.034  | -0.058   | -0.038  | 0.06    | 0.01    | -0.008  | -0.044   | -0.061  | -0.04   | 0.041   | 0.024   |
| ADC wav LLL glcm Idn                   | -0.407 | -0.013 | 0.249  | 0.336  | 0.012  | 0.018  | 0.058  | 0.33   | 0.062  | 0.142   | 0.225   | -0.063  | -0.128  | 0.012   | 0.029    | -0.061  | -0.109  | 0.11    | 0.005   | -0.025   | 0.008   | 0.087   | 0.062   | 0.168   |
| ADC wav LLL glszm ZoneVariance         | -0.088 | 0.784  | 0.077  | 0.041  | -0.032 | 0.049  | 0.031  | 0.029  | -0.008 | -0.001  | 0.045   | 0.013   | -0.005  | 0.039   | -0.001   | 0.012   | 0.018   | 0.018   | 0.014   | -0.055   | 0.005   | -0.03   | 0.007   | -0.014  |
| ADC lbp 2D firstorder Kurtosis         | -0.116 | 0.001  | -0.704 | -0.007 | -0.001 | -0.23  | -0.009 | -0.005 | -0.029 | 0.013   | 0.057   | -0.1    | 0.159   | 0.028   | -0.011   | -0.052  | 0.084   | 0.117   | 0.01    | -0.067   | 0.015   | -0.051  | 0.086   | 0.054   |

| ADC feature name                      | ADC F1 | ADC F2 | ADC F3 | ADC F4 | ADC F5 | ADC F6 | ADC F7 | ADC F8 | ADC F9 | ADC F10 | ADC F11 | ADC F12 | ADC F13 | ADC F14 | ADC F15 | ADC F16 | ADC F17 | ADC F18 | ADC F19 | ADC F20 | ADC F21 | ADC F22 | ADC F23 | ADC F24 |
|---------------------------------------|--------|--------|--------|--------|--------|--------|--------|--------|--------|---------|---------|---------|---------|---------|---------|---------|---------|---------|---------|---------|---------|---------|---------|---------|
| ADC lbp 2D firstorder Mean            | 0.052  | 0.097  | 0.155  | -0.047 | -0.104 | 0.704  | 0.04   | 0.055  | -0.041 | -0.053  | 0.106   | -0.177  | 0.121   | 0.051   | 0.067   | -0.047  | 0.009   | 0.023   | -0.011  | -0.102  | 0.017   | -0.014  | -0.021  | 0.057   |
| ADC lbp 2D firstorder Skewness        | -0.073 | -0.082 | -0.547 | 0.05   | 0.079  | -0.539 | 0.038  | 0.016  | -0.037 | 0.002   | -0.041  | 0.097   | 0.005   | 0.029   | 0.021   | 0.044   | -0.009  | -0.026  | -0.024  | 0.037   | 0.087   | -0.001  | 0.052   | -0.01   |
| ADC lbp 2D glcm ClusterShade          | 0.084  | -0.104 | -0.377 | -0.003 | 0.1    | -0.445 | 0.091  | 0.078  | -0.036 | -0.006  | -0.062  | 0.277   | -0.25   | 0.045   | 0.003   | 0.024   | 0.094   | -0.053  | 0.055   | 0.015   | 0.096   | 0.139   | 0.092   | -0.141  |
| ADC lbp 2D glcm ClusterTendency       | 0.036  | 0.065  | 0.758  | -0.074 | -0.005 | 0.073  | -0.03  | 0.019  | -0.046 | 0.045   | 0.04    | -0.005  | -0.093  | 0.054   | 0.03    | -0.038  | -0.074  | -0.082  | 0.018   | -0.021  | 0.057   | 0.035   | -0.054  | 0.072   |
| ADC lbp 2D glcm Correlation           | -0.218 | 0.138  | -0.621 | 0.077  | 0.025  | 0.15   | 0.01   | 0.063  | -0.009 | 0.005   | 0.027   | -0.034  | -0.177  | 0.034   | 0.186   | -0.076  | -0.072  | -0.054  | 0.08    | -0.02   | 0.017   | 0.027   | 0.062   | 0.13    |
| ADC lbp 2D glcm DifferenceEntropy     | -0.025 | -0.008 | 0.748  | 0.088  | 0.043  | 0.149  | -0.022 | 0.103  | 0.095  | 0.028   | -0.033  | 0.057   | -0.071  | -0.047  | -0.059  | 0.031   | -0.019  | -0.064  | -0.023  | 0.001   | 0.094   | 0.032   | -0.004  | 0.004   |
| ADC lbp 2D glcm DifferenceVariance    | 0.155  | -0.039 | 0.746  | -0.034 | -0.031 | -0.02  | -0.069 | 0.002  | -0.001 | 0.033   | 0.039   | 0.014   | 0.038   | 0.159   | -0.047  | -0.029  | -0.018  | -0.037  | -0.028  | -0.047  | 0.073   | 0.021   | -0.084  | 0.018   |
| ADC lbp 2D glcm JointEnergy           | 0.268  | -0.046 | -0.426 | -0.285 | -0.136 | -0.284 | 0.012  | -0.183 | -0.207 | 0.008   | 0.095   | -0.104  | 0.18    | 0.242   | 0.034   | -0.085  | 0.048   | 0.081   | -0.007  | 0.015   | -0.017  | -0.033  | 0.033   | -0.043  |
| ADC lbp 2D glcm Idm                   | -0.093 | -0.03  | -0.75  | 0.092  | -0.026 | -0.068 | -0.037 | 0.006  | 0.026  | -0.019  | 0.034   | -0.045  | 0.064   | 0.183   | 0.043   | -0.043  | 0.01    | 0.022   | -0.004  | -0.054  | 0.055   | -0.008  | 0.033   | 0.036   |
| ADC lbp 2D glcm InverseVariance       | 0.034  | 0.006  | -0.718 | 0.105  | -0.028 | -0.035 | -0.01  | 0.041  | -0.046 | -0.053  | 0.066   | -0.138  | 0.1     | 0.052   | 0.044   | -0.081  | 0.045   | 0.044   | 0.052   | -0.082  | -0.037  | -0.006  | 0.026   | 0.075   |
| ADC lbp 2D glcm MaximumProbability    | 0.144  | -0.104 | -0.509 | -0.217 | -0.092 | -0.135 | -0.014 | -0.169 | -0.175 | 0.037   | 0.066   | 0.024   | 0.163   | 0.398   | 0.036   | 0.052   | 0.039   | 0.038   | 0.002   | 0.052   | -0.052  | 0.021   | 0.044   | -0.068  |
| ADC lbp 2D glcm SumEntropy            | -0.325 | 0.066  | 0.522  | 0.257  | 0.121  | 0.212  | -0.04  | 0.193  | 0.161  | 0.026   | -0.031  | 0.032   | -0.109  | -0.115  | 0.005   | 0.068   | -0.083  | -0.109  | -0.009  | -0.047  | 0.066   | 0.032   | -0.031  | 0.109   |
| ADC lbp 2D glrlm GLNUN                | 0.006  | -0.019 | -0.551 | -0.143 | -0.08  | -0.225 | 0.006  | -0.037 | -0.167 | -0.002  | 0.115   | -0.136  | 0.322   | 0.271   | 0.06    | -0.051  | 0.015   | 0.024   | -0.055  | -0.048  | 0.064   | -0.04   | -0.015  | 0.095   |
| ADC lbp 2D glrlm HGLRE                | 0.07   | 0.085  | 0.397  | -0.085 | -0.115 | 0.618  | 0.025  | 0.033  | -0.053 | -0.034  | 0.095   | -0.157  | 0.085   | 0.056   | 0.068   | -0.037  | 0.002   | 0.033   | -0.008  | -0.061  | 0.014   | -0.006  | -0.041  | 0.058   |
| ADC lbp 2D glrlm LRHGLE               | 0.093  | 0.032  | 0.355  | 0.202  | -0.103 | 0.547  | 0.023  | 0.044  | -0.035 | -0.006  | 0.13    | -0.158  | 0.106   | 0.212   | 0.041   | -0.055  | -0.034  | 0.007   | -0.006  | -0.145  | 0.06    | -0.012  | -0.052  | 0.091   |
| ADC lbp 2D glrlm LRLGLE               | 0.044  | -0.019 | 0.68   | -0.028 | -0.019 | -0.344 | -0.06  | -0.078 | -0.018 | 0.084   | -0.026  | 0.029   | -0.04   | 0.145   | -0.038  | -0.043  | -0.036  | 0.019   | 0.002   | 0.057   | -0.041  | 0.041   | -0.068  | 0.02    |
| ADC lbp 2D glrlm RunEntropy           | -0.178 | -0.026 | 0.295  | 0.534  | 0.11   | 0.161  | 0.006  | 0.143  | 0.221  | 0.044   | -0.089  | 0.119   | -0.282  | -0.134  | -0.023  | 0.011   | -0.023  | -0.015  | 0.018   | 0.007   | 0.049   | 0.019   | 0.049   | -0.043  |
| ADC lbp 2D glszm GLNUN                | 0.006  | 0.01   | -0.501 | -0.217 | -0.089 | -0.219 | 0.048  | -0.034 | -0.187 | -0.036  | 0.13    | -0.17   | 0.332   | 0.215   | 0.104   | -0.09   | 0.006   | 0.059   | -0.039  | -0.051  | 0.076   | -0.045  | -0.006  | 0.098   |
| ADC lbp 2D glszm GrayLevelVariance    | 0.112  | -0.04  | 0.768  | -0.071 | -0.068 | -0.031 | -0.062 | -0.026 | -0.015 | 0.056   | -0.001  | -0.02   | -0.077  | 0.071   | -0.023  | -0.027  | -0.023  | -0.009  | -0.006  | 0.059   | -0.007  | 0.016   | -0.028  | -0.011  |
| ADC lbp 2D glszm HGLZE                | -0.064 | 0.118  | 0.207  | -0.068 | -0.107 | 0.713  | 0.044  | 0.032  | -0.038 | -0.038  | 0.038   | -0.127  | 0.037   | -0.003  | 0.122   | -0.01   | 0.037   | 0.096   | 0.011   | 0.021   | -0.009  | 0.022   | -0.032  | 0.035   |
| ADC lbp 2D glszm LAHGLE               | 0.015  | -0.041 | 0.142  | 0.528  | -0.041 | 0.21   | 0.064  | 0.021  | -0.072 | 0.132   | 0.196   | -0.059  | 0.066   | 0.406   | -0.021  | -0.015  | -0.053  | -0.022  | -0.012  | -0.181  | 0.063   | -0.013  | -0.085  | 0.045   |
| ADC lbp 2D glszm SZNUN                | 0.316  | 0.132  | 0.308  | -0.548 | -0.044 | 0.082  | 0.059  | -0.09  | -0.104 | -0.057  | -0.02   | 0.044   | -0.074  | -0.036  | 0.019   | 0.062   | 0.031   | 0.026   | 0.079   | 0.086   | -0.154  | 0.106   | 0.007   | -0.078  |
| ADC lbp 2D glszm SAHGLE               | -0.02  | 0.189  | 0.143  | -0.328 | -0.09  | 0.595  | 0.081  | -0.03  | -0.061 | -0.056  | -0.004  | -0.057  | -0.048  | -0.068  | 0.136   | 0.023   | 0.069   | 0.138   | 0.057   | 0.101   | -0.122  | 0.102   | -0.034  | -0.025  |
| ADC lbp 2D glszm ZoneVariance         | -0.073 | -0.063 | -0.311 | 0.534  | 0.006  | 0.026  | 0.057  | 0.036  | -0.046 | 0.15    | 0.01    | 0.111   | -0.015  | 0.408   | 0.035   | 0.128   | -0.044  | 0.015   | 0.019   | 0.012   | 0.049   | 0.035   | 0.039   | -0.029  |
| ADC lbp 2D gldm DependenceEntropy     | -0.363 | -0.011 | 0.04   | 0.604  | 0.114  | 0.116  | 0.032  | 0.157  | 0.22   | 0.002   | -0.039  | 0.067   | -0.156  | -0.015  | 0.032   | -0.013  | -0.051  | -0.023  | 0.003   | -0.052  | 0.087   | 0.012   | 0.023   | 0.027   |
| ADC lbp 2D gldm DependenceVariance    | -0.035 | -0.025 | -0.351 | 0.578  | 0.038  | 0.054  | 0.029  | 0.018  | 0.081  | -0.001  | -0.017  | 0.104   | -0.073  | 0.314   | 0.096   | 0.054   | -0.005  | 0.041   | 0.031   | 0.047   | 0.076   | 0.076   | 0.064   | -0.003  |
| ADC lbp 2D gldm LDGLGLE               | -0.136 | 0.022  | -0.505 | 0.247  | -0.001 | -0.384 | -0.065 | -0.091 | 0.004  | 0.097   | -0.045  | 0.044   | 0.002   | 0.281   | 0.03    | -0.048  | -0.059  | 0.057   | -0.002  | 0.036   | -0.01   | 0.04    | -0.149  | 0.102   |
| ADC lbp 2D gldm SDHGLE                | 0.083  | 0.159  | 0.295  | -0.485 | -0.087 | 0.45   | 0.056  | -0.031 | -0.084 | -0.056  | 0.011   | -0.062  | -0.02   | -0.118  | 0.085   | 0.008   | 0.057   | 0.083   | 0.044   | 0.068   | -0.115  | 0.062   | -0.013  | -0.031  |
| ADC lbp 3D m1 firstorder 10Percentile | -0.008 | 0.004  | -0.736 | 0.076  | 0.067  | 0.195  | 0.044  | 0.039  | -0.043 | -0.038  | -0.013  | 0.076   | 0.019   | 0.068   | 0.046   | 0.057   | -0.062  | -0.084  | -0.03   | 0.042   | 0.043   | -0.034  | -0.03   | -0.002  |

| ADC feature name                            | ADC F1 | ADC F2 | ADC F3 | ADC F4 | ADC F5 | ADC F6 | ADC F7 | ADC F8   | ADC F9 | ADC F10 | ADC F11 | ADC F12 | ADC F13 | ADC F14 | ADC F15 | ADC F16 | ADC F17 | ADC F18 | ADC F19 | ADC F20 | ADC F21 | ADC F22 | ADC F23 | ADC F24  |
|---------------------------------------------|--------|--------|--------|--------|--------|--------|--------|----------|--------|---------|---------|---------|---------|---------|---------|---------|---------|---------|---------|---------|---------|---------|---------|----------|
| ADC lbp 3D m1 firstorder 90Percentile       | 0.335  | 0.076  | 0.454  | -0.143 | -0.097 | 0.457  | 0.094  | -0.002   | -0.028 | -0.092  | 0.089   | 0.027   | 0.106   | 0.041   | 0.134   | 0.036   | -0.005  | -0.042  | 0.019   | 0.017   | -0.003  | -0.107  | 0.033   | -0.038   |
| ADC lbp 3D m1 firstorder InterquartileRange | 0.187  | 0.023  | 0.708  | -0.154 | -0.065 | 0.045  | -0.012 | -0.053   | -0.064 | -0.026  | 0.123   | -0.111  | 0.056   | -0.029  | 0.086   | 0.008   | -0.058  | 0.036   | 0.045   | -0.006  | -0.011  | -0.08   | -0.017  | 0.048    |
| ADC lbp 3D m1 firstorder Kurtosis           | -0.18  | 0.001  | -0.714 | 0.084  | 0.032  | -0.199 | -0.001 | 0.064    | -0.041 | 0.048   | -0.042  | 0.034   | 0.045   | 0.123   | -0.1    | -0.019  | 0.07    | 0.037   | -0.029  | 0.011   | 0.025   | 0.04    | 0.047   | -0.015   |
| ADC lbp 3D m1 firstorder Median             | 0.08   | 0.067  | -0.087 | -0.09  | -0.062 | 0.662  | -0.034 | 0.024    | 0.074  | -0.069  | 0.109   | -0.177  | -0.026  | -0.159  | -0.07   | -0.17   | 0.08    | 0.046   | -0.004  | -0.01   | 0.024   | -0.031  | 0.131   | 0.004    |
| ADC lbp 3D m1 firstorder RootMeanSquared    | 0.129  | 0.089  | -0.288 | -0.066 | -0.041 | 0.694  | 0.077  | 0.00E+00 | -0.004 | -0.067  | 0.066   | -0.078  | 0.049   | -0.055  | 0.051   | -0.044  | -0.004  | -0.055  | -0.014  | -0.02   | 0.047   | -0.056  | 0.031   | -0.047   |
| ADC lbp 3D m1 firstorder Skewness           | 0.093  | -0.058 | -0.453 | -0.086 | 0.054  | -0.432 | 0.106  | 0.052    | -0.174 | -0.004  | 0.099   | 0.06    | 0.081   | 0.239   | 0.208   | -0.044  | 0.006   | -0.05   | 0.032   | 0.008   | 0.042   | -0.142  | 0.014   | 0.087    |
| ADC lbp 3D m1 firstorder Uniformity         | 0.112  | -0.027 | -0.728 | 0.008  | -0.024 | -0.199 | -0.011 | -0.014   | -0.093 | 0.024   | -0.011  | 0.003   | 0.135   | 0.159   | -0.019  | -0.02   | 0.008   | 0.001   | -0.06   | 0.014   | 0.036   | 0.029   | 0.027   | -0.003   |
| ADC lbp 3D m1 glcm JointAverage             | -0.244 | 0.016  | 0.137  | 0.027  | 0.043  | 0.692  | 0.053  | 0.021    | 0.089  | -0.032  | -0.103  | 0.136   | -0.025  | 0.022   | -0.016  | 0.071   | -0.046  | -0.074  | -0.065  | 0.01    | -0.039  | 0.018   | -0.057  | -0.097   |
| ADC lbp 3D m1 glcm ClusterProminence        | -0.091 | 0.042  | 0.706  | -0.1   | -0.09  | 0.142  | 0.005  | -0.006   | -0.061 | -0.01   | 0.092   | -0.072  | 0.154   | 0.128   | 0.005   | 0.025   | -0.056  | -0.011  | -0.003  | -0.023  | 0.028   | -0.125  | 0.034   | 0.069    |
| ADC lbp 3D m1 glcm ClusterShade             | 0.073  | -0.082 | -0.205 | 0.001  | 0.162  | -0.392 | 0.055  | 0.064    | -0.167 | 0.005   | 0.07    | 0.285   | -0.051  | 0.257   | 0.2     | 0.015   | 0.068   | -0.174  | 0.102   | 0.098   | -0.025  | -0.067  | -0.051  | -0.008   |
| ADC lbp 3D m1 glcm Correlation              | -0.396 | 0.18   | -0.427 | 0.195  | 0.088  | 0.096  | -0.22  | -0.02    | -0.003 | 0.016   | -0.001  | -0.048  | -0.009  | -0.008  | 0.05    | -0.004  | -0.114  | -0.067  | 0.018   | 0.126   | -0.036  | -0.132  | -0.006  | 0.259    |
| ADC lbp 3D m1 glcm DifferenceEntropy        | -0.249 | -0.012 | 0.679  | 0.079  | 0.01   | 0.235  | 0.093  | 0.155    | 0.072  | -0.019  | 0.036   | -0.014  | 0.019   | -0.031  | 0.03    | 0.064   | -0.026  | -0.039  | 0.011   | -0.084  | 0.043   | -0.009  | 0.07    | 0.00E+00 |
| ADC lbp 3D m1 glcm DifferenceVariance       | 0.056  | -0.049 | 0.725  | -0.096 | -0.102 | 0.147  | 0.101  | 0.063    | -0.015 | -0.002  | 0.08    | -0.018  | 0.109   | 0.122   | 0.011   | 0.035   | -0.012  | -0.045  | -0.018  | -0.061  | 0.044   | -0.018  | 0.062   | -0.08    |
| ADC lbp 3D m1 glcm JointEnergy              | 0.559  | -0.016 | -0.321 | -0.264 | -0.131 | -0.208 | -0.024 | -0.199   | -0.153 | 0.008   | 0.009   | -0.003  | 0.075   | 0.123   | -0.024  | -0.056  | 0.032   | 0.041   | -0.023  | 0.058   | -0.033  | -0.013  | -0.019  | -0.066   |
| ADC lbp 3D m1 glcm JointEntropy             | -0.408 | 0.004  | 0.317  | 0.367  | 0.117  | 0.177  | 0.085  | 0.345    | 0.16   | 0.004   | 0.035   | -0.04   | -0.056  | -0.116  | 0.022   | 0.038   | -0.034  | -0.064  | 0.016   | -0.086  | 0.046   | 0.01    | 0.094   | 0.052    |
| ADC lbp 3D m1 glcm SumEntropy               | -0.48  | 0.041  | 0.466  | 0.21   | 0.074  | 0.249  | 0.029  | 0.197    | 0.1    | -0.009  | 0.039   | -0.037  | -0.019  | -0.079  | 0.028   | 0.057   | -0.046  | -0.06   | 0.022   | -0.05   | 0.022   | -0.027  | 0.074   | 0.085    |
| ADC lbp 3D m1 glrlm HGLRE                   | -0.267 | 0.068  | 0.245  | -0.031 | 0.048  | 0.668  | 0.089  | 0.034    | 0.057  | -0.031  | -0.043  | 0.128   | -0.01   | -0.014  | 0.007   | 0.102   | -0.009  | -0.038  | -0.019  | -0.028  | -0.024  | 0.019   | 0.002   | -0.089   |
| ADC lbp 3D m1 glszm GLNUN                   | 0.268  | -0.011 | -0.632 | -0.188 | -0.036 | -0.23  | -0.043 | -0.127   | -0.128 | -0.034  | 0.041   | -0.082  | 0.143   | 0.095   | -0.058  | -0.049  | 0.016   | -0.042  | -0.019  | 0.002   | 0.05    | 0.004   | -0.024  | 0        |
| ADC lbp 3D m1 glszm GrayLevelVariance       | 0.171  | 0.008  | 0.738  | 0.05   | -0.091 | 0.111  | 0.08   | 0.075    | 0.017  | 0.042   | 0.053   | 0.028   | -0.009  | 0.031   | 0.029   | 0.003   | 0.04    | 0.059   | 0.002   | 0.004   | -0.054  | -0.079  | 0.092   | -0.007   |
| ADC lbp 3D m1 glszm HGLZE                   | -0.252 | 0.079  | 0.104  | 0.07   | 0.077  | 0.675  | 0.101  | 0.06     | 0.048  | -0.009  | -0.046  | 0.167   | -0.034  | 0.005   | 0.068   | 0.149   | -0.01   | -0.055  | 0.009   | -0.032  | -0.022  | 0.004   | 0.027   | -0.046   |
| ADC lbp 3D m1 glszm LALGLE                  | 0.032  | -0.04  | 0.071  | 0.481  | -0.068 | -0.292 | 0.061  | 0.077    | -0.157 | 0.391   | 0.031   | -0.073  | 0.086   | 0.153   | 0.033   | 0.023   | 0.054   | 0.145   | 0.012   | 0.032   | -0.054  | 0.1     | 0.169   | 0.092    |
| ADC lbp 3D m1 glszm LGLZE                   | 0.499  | 0.006  | 0.509  | -0.014 | -0.12  | -0.256 | -0.031 | 0.019    | -0.044 | 0.019   | 0.02    | -0.083  | 0.073   | 0.021   | -0.077  | -0.004  | 0.006   | 0.076   | 0.034   | 0.002   | -0.071  | 0.042   | 0.086   | -0.016   |
| ADC lbp 3D m1 glszm SZNU                    | -0.144 | -0.034 | 0.184  | 0.26   | 0.078  | 0.05   | 0.17   | 0.663    | 0.045  | 0.105   | 0.124   | 0.022   | -0.049  | 0.007   | -0.046  | -0.034  | 0.007   | -0.01   | 0.014   | 0.043   | -0.015  | -0.035  | -0.039  | -0.028   |
| ADC lbp 3D m1 glszm SmallAreaEmphasis       | 0.24   | 0.036  | 0.321  | -0.578 | -0.1   | 0.237  | -0.007 | -0.072   | -0.004 | 0.001   | -0.045  | 0.081   | -0.06   | 0.116   | 0.02    | 0.004   | 0.004   | 0.051   | 0.005   | 0.054   | 0.07    | -0.061  | 0.046   | 0.004    |
| ADC lbp 3D m1 glszm SAHGLE                  | -0.095 | 0.096  | 0.14   | -0.201 | 0.028  | 0.665  | 0.066  | 0.041    | 0.043  | -0.01   | -0.045  | 0.185   | -0.064  | 0.061   | 0.092   | 0.142   | -0.01   | -0.028  | 0.03    | -0.022  | 0       | -0.069  | 0.072   | 0.004    |
| ADC lbp 3D m1 gldm DependenceEntropy        | -0.464 | -0.013 | 0.117  | 0.513  | 0.124  | 0.069  | 0.064  | 0.266    | 0.116  | 0.055   | 0.017   | -0.007  | -0.076  | -0.091  | 0.031   | 0.07    | -0.004  | -0.044  | -0.013  | -0.009  | -0.01   | 0.037   | 0.126   | -0.029   |
| ADC lbp 3D m1 gldm DependenceVariance       | -0.098 | -0.047 | -0.433 | 0.513  | 0.02   | -0.06  | 0.047  | 0.134    | -0.027 | 0.104   | -0.059  | 0.083   | 0.035   | 0.156   | 0.07    | 0.102   | 0.025   | 0.024   | -0.078  | 0.131   | 0.046   | 0.079   | 0.196   | -0.032   |
| ADC lbp 3D m1 gldm LDHGLE                   | -0.213 | -0.03  | -0.241 | 0.604  | 0.06   | 0.186  | 0.089  | 0.134    | 0.016  | 0.079   | -0.096  | 0.125   | 0.012   | 0.051   | -0.018  | 0.105   | 0.003   | 0.019   | -0.106  | 0.085   | -0.04   | 0.092   | 0.094   | -0.109   |
| ADC lbp 3D m1 gldm SDE                      | 0.225  | 0.035  | 0.359  | -0.629 | -0.093 | 0.176  | -0.022 | -0.111   | -0.026 | -0.044  | -0.003  | 0.022   | -0.023  | 0.044   | -0.017  | -0.032  | 0.001   | 0.023   | 0.038   | 0.001   | 0.054   | -0.055  | -0.026  | 0.009    |
| ADC lbp 3D m1 gldm SDHGLE                   | 0.007  | 0.081  | 0.308  | -0.492 | -0.034 | 0.517  | 0.016  | -0.039   | 0.016  | -0.04   | -0.009  | 0.098   | -0.023  | 0.032   | 0.029   | 0.047   | 0.004   | -0.004  | 0.043   | -0.035  | 0.028   | -0.075  | 0.021   | 0.006    |
| ADC lbp 3D m1 gldm SDLGLE                   | 0.582  | 0.01   | 0.444  | -0.202 | -0.125 | -0.141 | -0.039 | -0.036   | -0.047 | -0.002  | -0.001  | -0.064  | 0.059   | 0.033   | -0.065  | -0.012  | -0.002  | 0.055   | 0.059   | -0.03   | -0.041  | 0.017   | 0.024   | -0.012   |

| ADC feature name                            | ADC F1 | ADC F2 | ADC F3 | ADC F4 | ADC F5 | ADC F6 | ADC F7 | ADC F8 | ADC F9 | ADC F10 | ADC F11 | ADC F12 | ADC F13 | ADC F14 | ADC F15 | ADC F16 | ADC F17 | ADC F18 | ADC F19 | ADC F20 | ADC F21 | ADC F22 | ADC F23 | ADC F24 |
|---------------------------------------------|--------|--------|--------|--------|--------|--------|--------|--------|--------|---------|---------|---------|---------|---------|---------|---------|---------|---------|---------|---------|---------|---------|---------|---------|
| ADC lbp 3D m1 ngtdm Complexity              | 0.04   | -0.009 | 0.733  | -0.195 | -0.058 | 0.124  | 0.079  | -0.066 | -0.034 | -0.034  | 0.035   | 0.015   | 0.082   | 0.054   | 0.029   | 0.053   | -0.01   | 0.032   | -0.001  | -0.045  | -0.055  | -0.008  | -0.059  | -0.015  |
| ADC lbp 3D m2 firstorder 90Percentile       | 0.093  | 0.014  | 0.397  | -0.085 | -0.002 | 0.494  | -0.05  | -0.013 | -0.041 | 0.004   | 0.12    | 0.023   | 0.048   | 0.025   | -0.022  | -0.363  | 0.125   | -0.044  | 0.003   | 0.077   | -0.026  | -0.119  | 0.028   | -0.032  |
| ADC lbp 3D m2 firstorder InterquartileRange | 0.147  | 0.018  | 0.727  | -0.101 | -0.035 | 0.005  | -0.069 | -0.083 | -0.09  | 0.004   | 0.051   | -0.014  | 0.11    | 0.069   | 0.05    | -0.131  | -0.022  | -0.029  | -0.026  | 0.016   | 0.002   | -0.019  | -0.058  | 0.091   |
| ADC lbp 3D m2 firstorder Kurtosis           | -0.268 | 0.008  | -0.561 | 0.13   | 0.055  | 0.186  | 0.056  | 0.064  | 0.038  | 0.017   | -0.15   | 0.131   | -0.018  | 0.107   | -0.209  | 0.219   | -0.024  | 0.039   | 0.002   | 0.05    | -0.04   | 0.121   | 0.055   | -0.089  |
| ADC lbp 3D m2 firstorder Maximum            | -0.184 | 0.006  | 0.057  | 0.357  | 0.011  | -0.002 | 0.089  | 0.29   | 0.063  | 0.033   | 0.057   | 0.036   | -0.067  | -0.217  | 0.088   | -0.394  | 0.046   | 0.01    | -0.111  | -0.042  | 0.216   | -0.004  | 0.078   | 0.07    |
| ADC lbp 3D m2 firstorder Median             | 0.171  | -0.001 | -0.376 | 0.069  | 0.044  | 0.536  | -0.148 | 0.004  | 0.018  | 0.024   | -0.009  | -0.085  | -0.041  | 0.016   | -0.229  | -0.202  | 0.03    | -0.007  | 0.043   | -0.019  | -0.068  | -0.01   | 0.084   | 0.147   |
| ADC lbp 3D m2 firstorder Range              | -0.522 | 0.01   | 0.31   | 0.209  | 0.128  | 0.195  | 0.086  | 0.175  | 0.106  | 0.031   | -0.105  | 0.281   | -0.088  | -0.076  | 0.025   | -0.048  | 0.01    | 0.012   | -0.048  | -0.022  | 0.042   | 0.101   | 0.002   | -0.008  |
| ADC lbp 3D m2 firstorder RootMeanSquared    | 0.149  | 0.026  | -0.535 | 0.081  | 0.044  | 0.46   | -0.136 | -0.025 | 0.003  | -0.003  | -0.002  | -0.003  | 0.002   | 0.022   | -0.14   | -0.222  | 0.048   | -0.064  | 0.013   | 0.052   | 0.006   | -0.066  | -0.007  | 0.082   |
| ADC lbp 3D m2 firstorder Skewness           | 0.056  | -0.001 | -0.14  | -0.111 | -0.053 | -0.513 | 0.157  | -0.042 | -0.111 | -0.07   | 0.199   | -0.006  | 0.08    | -0.044  | 0.439   | -0.035  | 0.095   | -0.035  | -0.026  | -0.084  | 0.097   | -0.085  | -0.137  | -0.062  |
| ADC lbp 3D m2 glcm JointAverage             | -0.362 | -0.02  | 0.046  | 0.129  | 0.168  | 0.537  | -0.047 | 0.026  | 0.118  | 0.001   | -0.159  | 0.29    | -0.085  | 0.044   | -0.107  | -0.023  | -0.002  | -0.061  | -0.037  | 0.087   | -0.06   | 0.064   | -0.095  | 0.027   |
| ADC lbp 3D m2 glcm ClusterProminence        | -0.165 | 0.016  | 0.74   | -0.006 | -0.021 | 0.014  | -0.053 | -0.023 | -0.051 | 0.006   | 0       | -0.005  | 0.139   | 0.035   | -0.076  | -0.064  | -0.05   | 0.021   | -0.052  | 0.034   | 0.069   | -0.028  | 0.065   | 0.105   |
| ADC lbp 3D m2 glcm ClusterShade             | 0.062  | -0.027 | -0.268 | -0.03  | -0.025 | -0.443 | 0.106  | -0.042 | -0.103 | -0.033  | 0.145   | 0.158   | -0.05   | -0.073  | 0.337   | 0.056   | 0.195   | -0.011  | 0.01    | -0.079  | -0.006  | 0.055   | -0.167  | -0.249  |
| ADC lbp 3D m2 glcm Correlation              | -0.253 | 0.141  | -0.555 | 0.176  | 0.087  | -0.223 | -0.12  | -0.068 | -0.08  | -0.003  | -0.039  | 0.011   | -0.083  | -0.062  | -0.084  | -0.119  | -0.026  | 0.009   | 0.004   | 0.044   | 0.085   | -0.003  | 0.042   | 0.187   |
| ADC lbp 3D m2 glcm DifferenceVariance       | -0.062 | -0.065 | 0.749  | -0.041 | -0.036 | 0.107  | 0.014  | 0.062  | 0.033  | 0.02    | 0.044   | -0.015  | 0.172   | 0.084   | -0.015  | -0.006  | 0.019   | -0.002  | -0.01   | -0.026  | 0.049   | 0.008   | 0.028   | -0.053  |
| ADC lbp 3D m2 glcm MaximumProbability       | 0.419  | -0.027 | -0.434 | -0.28  | -0.164 | -0.198 | -0.044 | -0.237 | -0.141 | -0.015  | 0.022   | -0.05   | 0.121   | 0.111   | -0.012  | -0.057  | 0.065   | 0.039   | 0.025   | 0.022   | -0.002  | -0.023  | -0.065  | -0.113  |
| ADC lbp 3D m2 glcm SumEntropy               | -0.513 | 0.033  | 0.456  | 0.257  | 0.121  | 0.098  | -0.006 | 0.199  | 0.088  | 0.01    | 0.008   | -0.002  | -0.019  | -0.095  | -0.007  | 0       | -0.016  | -0.026  | 0.002   | -0.053  | 0.058   | 0.033   | 0.094   | 0.104   |
| ADC lbp 3D m2 glrlm LRHGLE                  | -0.37  | -0.004 | 0.035  | 0.28   | 0.17   | 0.502  | 0      | 0.047  | 0.074  | 0.036   | -0.132  | 0.297   | -0.038  | 0.027   | -0.113  | -0.045  | 0.022   | -0.03   | 0.012   | 0.047   | -0.045  | 0.092   | -0.046  | 0.021   |
| ADC lbp 3D m2 glrlm LRLGLE                  | 0.591  | -0.012 | 0.353  | -0.082 | -0.145 | -0.241 | -0.006 | -0.032 | -0.077 | 0.003   | 0.062   | -0.188  | 0.067   | 0.029   | -0.055  | 0.022   | -0.022  | 0.044   | 0.049   | -0.041  | -0.056  | 0.026   | 0.089   | -0.007  |
| ADC lbp 3D m2 glrlm SRHGLE                  | -0.397 | 0.031  | 0.141  | 0.061  | 0.164  | 0.538  | -0.028 | 0.051  | 0.085  | 0.014   | -0.132  | 0.316   | -0.056  | 0.03    | -0.073  | -0.025  | 0.018   | -0.03   | 0.01    | 0.035   | -0.047  | 0.073   | -0.032  | 0.025   |
| ADC lbp 3D m2 glszm GLNUN                   | 0.266  | 0.037  | -0.67  | -0.197 | -0.042 | -0.038 | -0.062 | -0.139 | -0.11  | -0.021  | 0.02    | -0.064  | 0.04    | 0.09    | -0.03   | 0.051   | -0.046  | -0.102  | -0.029  | 0.037   | -0.006  | -0.072  | -0.047  | 0.011   |
| ADC lbp 3D m2 glszm GrayLevelVariance       | -0.068 | -0.023 | 0.748  | 0.161  | -0.051 | 0.006  | 0.041  | 0.05   | 0.04   | 0.025   | 0.019   | 0.007   | 0.084   | 0.029   | -0.049  | -0.1    | 0.052   | 0.104   | 0.021   | -0.011  | 0.001   | 0.037   | 0.053   | -0.003  |
| ADC lbp 3D m2 glszm HGLZE                   | -0.459 | 0.029  | -0.001 | 0.114  | 0.142  | 0.482  | 0.024  | 0.066  | 0.073  | 0.03    | -0.127  | 0.344   | -0.045  | 0.035   | -0.016  | 0.038   | 0.026   | -0.028  | 0.014   | 0.03    | -0.027  | 0.062   | -0.077  | -0.027  |
| ADC lbp 3D m2 glszm LAHGLE                  | -0.1   | -0.044 | -0.168 | 0.639  | 0.075  | 0.132  | 0.182  | 0.059  | -0.093 | 0.184   | -0.034  | 0.108   | -0.044  | 0.021   | -0.094  | -0.011  | 0.083   | 0.189   | -0.009  | 0.049   | -0.026  | 0.023   | -0.095  | -0.011  |
| ADC lbp 3D m2 glszm LALGLE                  | 0.168  | -0.049 | -0.125 | 0.506  | -0.115 | -0.285 | 0.191  | 0.031  | -0.145 | 0.182   | 0.168   | -0.155  | 0.062   | 0.028   | -0.016  | -0.009  | 0.095   | 0.252   | 0.014   | -0.048  | 0.026   | -0.05   | 0.001   | -0.016  |
| ADC lbp 3D m2 glszm LGLZE                   | 0.609  | -0.001 | 0.372  | 0.037  | -0.144 | -0.181 | -0.003 | 0.007  | -0.045 | -0.003  | 0.049   | -0.158  | 0.039   | 0.032   | -0.095  | -0.036  | -0.015  | 0.042   | 0.043   | -0.019  | -0.091  | 0.046   | 0.114   | -0.033  |
| ADC lbp 3D m2 glszm SmallAreaEmphasis       | -0.234 | 0.118  | 0.29   | -0.593 | -0.049 | 0.072  | -0.021 | -0.009 | -0.077 | -0.008  | -0.085  | -0.022  | -0.009  | 0.085   | 0.051   | 0.08    | 0.086   | 0.133   | 0.017   | 0.006   | -0.016  | -0.006  | 0.031   | -0.024  |
| ADC lbp 3D m2 glszm SAHGLE                  | -0.524 | 0.087  | -0.036 | -0.155 | 0.114  | 0.402  | 0.008  | 0.052  | 0.016  | 0.031   | -0.138  | 0.286   | -0.037  | 0.09    | 0.03    | 0.112   | 0.04    | 0.02    | 0.024   | 0.009   | -0.03   | 0.023   | -0.068  | -0.003  |
| ADC lbp 3D m2 glszm ZoneEntropy             | -0.384 | -0.059 | 0.083  | 0.539  | 0.142  | 0.044  | 0.12   | 0.304  | 0.108  | 0.067   | 0.034   | 0.066   | -0.044  | -0.105  | 0.024   | -0.021  | -0.051  | -0.024  | 0.01    | -0.039  | 0.06    | 0.082   | 0.069   | 0.003   |
| ADC lbp 3D m2 glszm ZoneVariance            | -0.082 | -0.035 | -0.205 | 0.606  | -0.011 | 0.022  | 0.226  | 0.068  | -0.106 | 0.2     | 0.027   | 0.047   | -0.037  | 0.015   | -0.046  | 0.007   | 0.125   | 0.252   | -0.016  | 0.022   | 0.001   | -0.016  | -0.1    | -0.054  |

| ADC feature name                        | ADC F1 | ADC F2 | ADC F3 | ADC F4 | ADC F5 | ADC F6 | ADC F7 | ADC F8   | ADC F9 | ADC F10 | ADC F11 | ADC F12 | ADC F13 | ADC F14 | ADC F15 | ADC F16 | ADC F17 | ADC F18 | ADC F19 | ADC F20 | ADC F21 | ADC F22 | ADC F23 | ADC F24 |
|-----------------------------------------|--------|--------|--------|--------|--------|--------|--------|----------|--------|---------|---------|---------|---------|---------|---------|---------|---------|---------|---------|---------|---------|---------|---------|---------|
| ADC lbp 3D m2 gldm DependenceVariance   | -0.162 | -0.081 | -0.435 | 0.527  | -0.013 | -0.078 | 0.074  | -0.001   | 0.013  | 0.058   | -0.005  | -0.072  | 0.099   | 0.045   | -0.101  | 0.002   | 0.145   | 0.039   | 0.054   | 0.035   | 0.079   | 0.032   | -0.074  | -0.156  |
| ADC lbp 3D m2 gldm LDLGLE               | 0.282  | -0.071 | -0.094 | 0.176  | -0.131 | -0.475 | 0.05   | -0.047   | -0.124 | 0.048   | 0.18    | -0.312  | 0.175   | 0.03    | 0.022   | 0.044   | 0.027   | 0.111   | 0.052   | -0.082  | 0.069   | -0.044  | 0.063   | 0.023   |
| ADC lbp 3D m2 gldm SDE                  | -0.016 | 0.091  | 0.346  | -0.691 | -0.058 | 0.061  | -0.048 | -0.029   | -0.042 | -0.028  | -0.05   | 0.009   | -0.035  | 0.042   | 0.055   | 0.039   | 0.033   | 0.052   | -0.015  | -0.007  | -0.013  | -0.019  | 0.033   | -0.019  |
| ADC lbp 3D m2 gldm SDHGLE               | -0.351 | 0.107  | 0.245  | -0.502 | 0.052  | 0.339  | -0.042 | 0.02     | 0.016  | -0.007  | -0.105  | 0.21    | -0.049  | 0.065   | 0.035   | 0.06    | 0.04    | 0.023   | 0       | -0.002  | -0.028  | 0.003   | -0.009  | -0.006  |
| ADC lbp 3D m2 gldm SDLGLE               | 0.608  | 0.017  | 0.395  | -0.139 | -0.146 | -0.128 | -0.009 | 0.00E+00 | -0.049 | -0.017  | 0.006   | -0.132  | 0.02    | 0.053   | -0.053  | -0.049  | -0.012  | 0.026   | 0.031   | -0.008  | -0.079  | 0.041   | 0.099   | -0.053  |
| ADC lbp 3D m2 ngtdm Complexity          | -0.196 | 0.019  | 0.695  | 0.011  | 0.037  | 0.177  | 0.105  | 0.106    | -0.014 | 0.018   | -0.016  | 0.114   | 0.064   | -0.033  | 0.03    | -0.115  | 0.008   | -0.031  | -0.07   | 0.001   | 0.11    | 0.042   | 0.007   | 0.058   |
| ADC lbp 3D k firstorder 10Percentile    | 0.513  | 0.017  | -0.465 | -0.12  | -0.118 | -0.046 | -0.033 | -0.048   | -0.064 | 0.012   | 0.149   | -0.12   | -0.022  | 0.008   | 0.037   | -0.09   | -0.018  | 0.196   | -0.059  | -0.107  | -0.054  | 0.029   | -0.059  | 0.078   |
| ADC lbp 3D k firstorder 90Percentile    | 0.14   | -0.08  | 0.076  | -0.141 | 0.062  | -0.053 | 0.723  | 0.082    | -0.092 | 0.064   | 0.071   | -0.05   | 0.029   | 0.015   | 0.062   | -0.028  | -0.066  | 0.104   | 0.003   | -0.057  | 0.012   | 0.074   | -0.042  | -0.011  |
| ADC lbp 3D k firstorder Kurtosis        | -0.026 | -0.068 | 0.089  | 0.098  | 0.041  | 0.07   | 0.039  | -0.001   | 0.736  | 0.09    | 0.024   | 0.012   | -0.033  | -0.019  | -0.037  | 0.019   | 0.023   | 0.009   | 0.026   | 0.03    | -0.056  | -0.059  | 0.019   | -0.083  |
| ADC lbp 3D k firstorder Maximum         | -0.024 | -0.07  | 0.142  | 0.066  | 0.123  | 0.053  | 0.53   | 0.198    | 0.447  | 0.086   | 0.14    | -0.025  | -0.029  | -0.048  | -0.014  | -0.013  | -0.075  | 0.059   | 0.046   | 0.002   | -0.015  | 0.028   | 0.037   | 0.021   |
| ADC lbp 3D k firstorder Median          | 0.415  | -0.037 | 0.325  | -0.244 | -0.042 | -0.097 | 0.343  | -0.009   | -0.152 | 0.026   | 0.186   | -0.087  | 0.03    | -0.007  | 0.098   | -0.04   | -0.055  | 0.256   | -0.047  | -0.09   | -0.047  | 0.015   | 0.056   | -0.038  |
| ADC lbp 3D k firstorder Minimum         | 0.679  | 0.035  | 0.001  | -0.08  | -0.127 | -0.069 | -0.17  | -0.174   | 0.015  | -0.039  | -0.028  | -0.092  | 0.017   | -0.031  | 0.075   | -0.009  | -0.032  | 0.137   | -0.057  | 0.052   | 0.014   | 0.001   | 0.043   | 0.032   |
| ADC lbp 3D k firstorder RMAD            | 0.151  | -0.089 | -0.043 | -0.137 | 0.048  | -0.061 | 0.729  | 0.041    | -0.157 | 0.053   | -0.007  | -0.009  | 0.043   | 0.01    | 0.05    | -0.008  | -0.042  | 0.034   | 0.049   | 0.004   | -0.001  | 0.063   | 0.014   | -0.038  |
| ADC lbp 3D k firstorder RootMeanSquared | 0.385  | -0.059 | 0.291  | -0.192 | -0.005 | -0.067 | 0.499  | 0.022    | -0.098 | 0.043   | 0.16    | -0.095  | 0.026   | -0.002  | 0.089   | -0.031  | -0.064  | 0.211   | -0.039  | -0.088  | -0.026  | 0.035   | 0.005   | 0.013   |
| ADC lbp 3D k firstorder Skewness        | 0.014  | -0.079 | -0.026 | 0.243  | 0.052  | 0.081  | 0.135  | 0.048    | 0.674  | 0.079   | -0.031  | 0.044   | -0.053  | -0.016  | -0.05   | 0.061   | 0.077   | -0.106  | -0.015  | 0.074   | 0.011   | -0.029  | -0.06   | -0.016  |
| ADC lbp 3D k glcm ClusterShade          | 0.155  | -0.066 | -0.063 | 0.146  | 0.027  | 0.076  | 0.638  | 0.079    | 0.298  | 0.093   | -0.014  | 0.017   | 0.064   | 0.027   | -0.095  | -0.005  | 0.01    | -0.046  | 0.014   | 0.052   | 0.012   | 0.026   | -0.05   | 0.029   |
| ADC lbp 3D k glcm DifferenceVariance    | 0.139  | -0.096 | -0.031 | 0.08   | 0.019  | 0.085  | 0.741  | 0.068    | 0.06   | -0.002  | 0.022   | -0.013  | 0.028   | 0.005   | -0.008  | 0.034   | -0.027  | -0.058  | -0.042  | 0.033   | 0.059   | 0.021   | 0.016   | 0.008   |
| ADC lbp 3D k glcm JointEnergy           | 0.17   | 0.029  | 0.359  | -0.086 | -0.069 | 0.09   | -0.573 | -0.056   | 0.011  | -0.034  | 0.135   | -0.104  | 0.048   | 0.065   | -0.026  | -0.059  | -0.032  | 0.15    | 0.018   | -0.117  | -0.099  | 0.036   | 0.061   | 0.129   |
| ADC lbp 3D k glcm Imc2                  | 0.421  | -0.067 | -0.179 | -0.38  | -0.097 | -0.2   | 0.237  | -0.205   | -0.011 | 0.115   | -0.086  | 0.111   | -0.078  | 0.127   | 0.015   | -0.012  | 0.022   | 0.006   | 0.062   | 0.111   | -0.056  | -0.002  | -0.149  | -0.028  |
| ADC lbp 3D k glcm Idmn                  | -0.187 | -0.095 | 0.282  | 0.093  | 0.132  | 0.185  | 0.109  | 0.213    | 0.547  | 0.057   | 0.069   | 0       | -0.051  | -0.025  | 0.012   | -0.115  | 0.017   | 0.08    | 0.015   | -0.118  | -0.115  | 0.028   | 0.007   | 0.157   |
| ADC lbp 3D k glcm MaximumProbability    | 0.045  | 0.01   | 0.486  | -0.087 | -0.012 | 0.083  | -0.42  | 0.017    | 0.006  | -0.043  | 0.169   | -0.118  | 0.01    | 0.023   | 0.098   | -0.022  | -0.105  | 0.229   | -0.024  | -0.162  | -0.041  | 0.038   | 0.092   | 0.169   |
| ADC lbp 3D k glrlm GLNUN                | 0.171  | 0.101  | 0.091  | -0.248 | -0.126 | 0.06   | -0.667 | -0.137   | 0.039  | -0.052  | 0.012   | -0.046  | 0.021   | 0.055   | -0.018  | -0.086  | 0.004   | 0.086   | -0.059  | -0.029  | -0.057  | -0.061  | 0.027   | 0.073   |
| ADC lbp 3D k glrlm HGLRE                | -0.289 | -0.069 | 0.238  | -0.094 | 0.095  | -0.027 | 0.615  | 0.049    | -0.028 | 0.08    | 0.178   | -0.102  | 0.004   | -0.002  | 0.062   | -0.006  | -0.045  | 0.195   | -0.032  | -0.078  | -0.028  | 0.038   | 0.009   | 0.013   |
| ADC lbp 3D k glrlm LGLRE                | 0.47   | 0.014  | -0.328 | 0.237  | -0.09  | 0.035  | -0.281 | 0.001    | 0.056  | -0.045  | -0.167  | 0.146   | 0.015   | -0.003  | -0.123  | 0.036   | 0.073   | -0.268  | 0.056   | 0.126   | 0.024   | -0.03   | -0.022  | -0.051  |
| ADC lbp 3D k glrlm RunEntropy           | -0.198 | -0.101 | 0.255  | 0.617  | 0.093  | -0.037 | 0.289  | 0.174    | 0.051  | 0.076   | 0.09    | -0.027  | -0.032  | -0.006  | 0.037   | 0.02    | -0.023  | 0.022   | 0.027   | -0.005  | -0.015  | 0.021   | 0.011   | 0.033   |
| ADC lbp 3D k glrlm ShortRunEmphasis     | 0.019  | 0.047  | -0.383 | -0.632 | 0.007  | 0.055  | 0.234  | -0.039   | -0.027 | -0.024  | -0.071  | 0.081   | 0.007   | -0.034  | -0.004  | 0.063   | 0.02    | -0.063  | -0.004  | 0.004   | 0.049   | 0.007   | -0.004  | -0.068  |
| ADC lbp 3D k glrlm SRHGLE               | -0.209 | -0.057 | 0.079  | -0.274 | 0.086  | -0.015 | 0.667  | 0.037    | -0.027 | 0.078   | 0.136   | -0.068  | 0.007   | -0.012  | 0.052   | 0.011   | -0.022  | 0.159   | -0.014  | -0.057  | -0.017  | 0.033   | 0.007   | -0.013  |
| ADC lbp 3D k glrlm SRLGLE               | 0.399  | 0.037  | -0.42  | 0.049  | -0.078 | 0.087  | -0.253 | -0.011   | 0.047  | -0.091  | -0.19   | 0.18    | 0.028   | -0.016  | -0.13   | 0.068   | 0.055   | -0.309  | 0.038   | 0.11    | 0.055   | -0.014  | -0.013  | -0.063  |
| ADC lbp 3D k glszm GLNU                 | -0.159 | -0.031 | 0.065  | 0.092  | 0.144  | 0.049  | 0.111  | 0.726    | 0.063  | 0.08    | 0.039   | -0.009  | 0.046   | 0.004   | -0.015  | -0.032  | 0.022   | 0.011   | -0.021  | 0.024   | -0.024  | 0.06    | 0.005   | 0.006   |
| ADC lbp 3D k glszm GLNUN                | -0.116 | 0.022  | 0.018  | -0.004 | 0.039  | -0.078 | -0.68  | 0.054    | 0.035  | 0.017   | -0.033  | -0.01   | 0.153   | -0.069  | -0.036  | -0.03   | -0.018  | 0.163   | -0.026  | 0.022   | 0.045   | 0.077   | 0.112   | -0.055  |
| ADC lbp 3D k glszm GrayLevelVariance    | -0.085 | -0.107 | 0.272  | 0.119  | 0.01   | 0.098  | 0.602  | 0.073    | 0.215  | -0.007  | 0.193   | -0.023  | -0.045  | -0.033  | 0.02    | -0.024  | -0.095  | 0.061   | -0.075  | -0.134  | -0.01   | -0.13   | -0.067  | 0.022   |

| ADC feature name                     | ADC F1 | ADC F2   | ADC F3 | ADC F4 | ADC F5   | ADC F6 | ADC F7 | ADC F8 | ADC F9 | ADC F10 | ADC F11 | ADC F12 | ADC F13 | ADC F14 | ADC F15 | ADC F16 | ADC F17 | ADC F18 | ADC F19 | ADC F20 | ADC F21 | ADC F22 | ADC F23 | ADC F24 |
|--------------------------------------|--------|----------|--------|--------|----------|--------|--------|--------|--------|---------|---------|---------|---------|---------|---------|---------|---------|---------|---------|---------|---------|---------|---------|---------|
| ADC lbp 3D k glszm HGLZE             | -0.039 | -0.091   | 0.014  | 0.415  | 0.083    | 0.04   | 0.58   | 0.089  | 0.168  | 0.082   | -0.052  | 0.078   | 0.032   | -0.012  | -0.016  | -0.005  | 0.029   | 0.056   | 0.009   | 0.059   | -0.04   | -0.102  | 0.165   | -0.022  |
| ADC lbp 3D k glszm LAHGLE            | -0.08  | -0.031   | 0.165  | 0.508  | 0.028    | -0.124 | -0.062 | 0.438  | -0.082 | 0.159   | 0.131   | 0.103   | -0.035  | -0.052  | -0.015  | -0.071  | -0.023  | 0.131   | 0.016   | 0.111   | -0.037  | -0.03   | 0.029   | -0.113  |
| ADC lbp 3D k glszm LGLZE             | -0.118 | 0.007    | -0.303 | -0.418 | -0.107   | 0.039  | -0.213 | -0.058 | -0.078 | -0.109  | 0.191   | -0.114  | -0.081  | -0.015  | 0.054   | -0.024  | -0.113  | 0.04    | -0.13   | -0.242  | 0.068   | 0.004   | -0.252  | 0.107   |
| ADC lbp 3D k glszm SZNU              | -0.122 | -0.037   | 0.002  | 0.1    | 0.093    | 0.121  | 0.382  | 0.608  | 0.084  | 0.094   | 0.048   | 0.023   | 0.024   | 0.103   | -0.096  | -0.001  | 0.019   | -0.092  | 0.013   | 0.011   | -0.059  | -0.051  | -0.019  | 0.076   |
| ADC lbp 3D k glszm SAHGLE            | 0.082  | -0.039   | 0.01   | 0.314  | 0.00E+00 | 0.11   | 0.547  | 0.084  | 0.207  | -0.006  | -0.057  | 0.106   | 0.073   | 0.026   | -0.057  | -0.042  | -0.003  | -0.006  | -0.035  | 0.005   | -0.052  | -0.227  | 0.245   | 0.056   |
| ADC lbp 3D k glszm ZonePercentage    | 0.183  | 0.007    | -0.026 | -0.706 | -0.004   | -0.01  | 0.205  | -0.079 | -0.117 | 0.014   | -0.012  | 0.027   | 0.039   | 0.077   | 0.01    | -0.004  | 0.09    | 0.084   | 0.051   | 0.004   | 0.001   | 0.054   | 0.055   | -0.034  |
| ADC lbp 3D k glcm DependenceEntropy  | -0.316 | -0.029   | 0.026  | 0.56   | 0.133    | -0.011 | 0.281  | 0.221  | 0.104  | 0.047   | 0.019   | 0.011   | -0.066  | -0.029  | 0.04    | 0.102   | 0.005   | -0.13   | 0.084   | 0.01    | 0.043   | 0.082   | -0.025  | 0.053   |
| ADC lbp 3D k glcm DependenceVariance | -0.059 | -0.001   | -0.438 | 0.527  | 0.052    | 0.036  | 0.004  | 0.099  | -0.048 | 0.022   | 0.212   | -0.076  | 0.019   | 0.069   | 0.018   | 0.038   | -0.014  | -0.029  | 0.085   | -0.095  | -0.027  | 0.148   | 0.016   | 0.13    |
| ADC lbp 3D k glcm LDLGLE             | 0.367  | -0.046   | 0.091  | 0.626  | -0.051   | -0.065 | -0.153 | 0.07   | 0.019  | 0.093   | 0.039   | 0.003   | -0.029  | 0.064   | -0.056  | -0.033  | 0.083   | -0.084  | 0.101   | 0.074   | -0.051  | 0.014   | -0.025  | 0.021   |
| ADC lbp 3D k glcm SDE                | 0.146  | 0.046    | -0.166 | -0.673 | 0.017    | 0.072  | 0.297  | 0.02   | -0.07  | -0.013  | -0.015  | 0.044   | 0.063   | 0.056   | -0.025  | 0.026   | 0.063   | 0.016   | 0.051   | -0.003  | 0.034   | 0.027   | 0.098   | -0.002  |
| ADC lbp 3D k glcm SDHGLE             | 0.18   | -0.027   | -0.099 | -0.458 | 0.021    | 0.091  | 0.565  | 0.025  | 0.031  | -0.006  | -0.02   | 0.044   | 0.115   | 0.071   | 0.003   | -0.025  | 0.046   | 0.045   | 0.051   | 0.025   | -0.028  | -0.03   | 0.14    | 0.005   |
| ADC lbp 3D k glcm SDLGLE             | -0.039 | 0.027    | -0.083 | -0.735 | 0.037    | 0.115  | 0.127  | 0.057  | -0.082 | -0.032  | 0.007   | 0.016   | -0.023  | 0       | -0.09   | 0.065   | 0.01    | 0.032   | -0.013  | -0.06   | 0.115   | 0.033   | 0.023   | 0.026   |
| ADC lbp 3D k ngtdm Busyness          | -0.097 | 0.00E+00 | -0.092 | 0.466  | 0.041    | -0.063 | -0.07  | 0.517  | -0.147 | 0.179   | -0.047  | 0.151   | -0.018  | 0.027   | 0.004   | -0.005  | -0.003  | 0.022   | 0.08    | 0.161   | 0       | -0.015  | 0.007   | -0.091  |
| ADC lbp 3D k ngtdm Complexity        | -0.018 | -0.089   | 0.052  | 0.086  | 0.086    | 0.128  | 0.559  | 0.132  | 0.452  | 0.044   | 0.022   | 0.033   | 0.014   | -0.057  | -0.078  | -0.098  | -0.01   | -0.052  | 0.009   | 0.002   | -0.025  | 0.036   | 0.026   | 0.083   |
| ADC lbp 3D k ngtdm Contrast          | 0.247  | 0.054    | -0.412 | -0.107 | -0.101   | -0.195 | 0.085  | -0.158 | -0.434 | 0.016   | -0.075  | 0.047   | 0.056   | 0.007   | -0.05   | 0.138   | 0.014   | -0.094  | 0.066   | 0.131   | 0.067   | -0.019  | -0.016  | -0.207  |
| ADC lbp 3D k ngtdm Strength          | 0.678  | -0.035   | 0.091  | -0.221 | -0.114   | 0.012  | 0.039  | -0.235 | 0.172  | -0.01   | -0.008  | 0.038   | 0.045   | 0.049   | 0.042   | -0.047  | -0.049  | 0.073   | 0.009   | 0.028   | -0.083  | -0.03   | -0.048  | 0.02    |

**Table S12** Factor loadings for the 32 TIC factors. A darker grey in the column cell correspond to a higher loading measuring the association between features and factors. Abbreviations: TIC = post-contrast T1; LDLGLE = Large Dependence Low Gray Level Emphasis; LDHGLE = Large Dependence High Gray Level Emphasis; SDLGLE = Small Dependence Low Gray Level Emphasis; LALGLE = Large Area Low Gray Level Emphasis; GLNUN = Gray level non uniformity normalized; glcm = gray level co-occurrence matrix; glcm = Gray Level Dependence Matrix; glszm = Gray Level Size Zone Matrix; ngtdm = Neighbouring Gray Tone Difference Matrix; glrlm = Gray Level Run Length Matrix; wav = wavelet; lbp = local binary pattern; L = Low-pass filter; H = High-pass filter.

| TIC feature name            | TIC F1 | TIC F2 | TIC F3 | TIC F4 | TIC F5 | TIC F6 | TIC F7 | TIC F8 | TIC F9 | TIC F10 | TIC F11 | TIC F12 | TIC F13 | TIC F14 | TIC F15 | TIC F16 | TIC F17 | TIC F18 | TIC F19 | TIC F20 | TIC F21 | TIC F22 | TIC F23 | TIC F24 | TIC F25 | TIC F26 | TIC F27 | TIC F28 | TIC F29 | TIC F30 | TIC F31 | TIC F32 |
|-----------------------------|--------|--------|--------|--------|--------|--------|--------|--------|--------|---------|---------|---------|---------|---------|---------|---------|---------|---------|---------|---------|---------|---------|---------|---------|---------|---------|---------|---------|---------|---------|---------|---------|
| TIC glrlm SRLGLE            | -0.754 | -0.165 | 0.049  | 0.025  | -0.03  | 0.007  | -0.081 | -0.08  | 0.087  | 0.065   | -0.032  | 0.002   | -0.069  | -0.017  | 0.052   | -0.058  | -0.072  | -0.061  | -0.069  | -0.021  | -0.023  | -0.115  | 0.014   | 0.056   | 0.085   | 0.004   | -0.005  | 0.05    | 0.052   | 0.029   | 0.065   | -0.018  |
| TIC glcm SDHGLE             | 0.161  | 0.637  | 0.017  | -0.003 | 0.029  | 0.002  | 0.094  | 0.381  | 0.093  | -0.04   | 0.01    | 0.052   | 0.063   | 0.195   | 0.07    | 0.038   | 0.069   | -0.028  | 0.025   | -0.023  | -0.015  | 0.057   | 0.042   | -0.032  | -0.063  | -0.005  | 0.091   | -0.015  | -0.059  | -0.071  | -0.022  | 0.047   |
| TIC glcm LDLGLE             | -0.242 | -0.5   | -0.181 | 0.113  | 0.299  | 0.119  | -0.114 | 0.025  | -0.15  | 0.191   | -0.019  | -0.039  | -0.09   | 0.04    | 0.108   | -0.114  | -0.067  | 0.048   | -0.099  | -0.082  | 0.027   | -0.099  | 0.031   | 0.058   | 0.039   | 0.085   | -0.088  | 0.036   | 0.124   | 0.054   | 0.13    | -0.088  |
| TIC glcm LDHGLE             | 0.354  | 0.232  | -0.443 | -0.022 | 0.134  | 0.097  | 0.172  | 0.074  | 0.293  | -0.036  | -0.033  | 0.105   | 0.016   | 0.06    | 0.059   | -0.008  | -0.003  | 0.001   | 0.099   | 0.004   | -0.022  | 0.114   | 0.005   | -0.124  | -0.082  | 0.075   | 0.089   | 0.033   | -0.139  | -0.133  | -0.041  | 0.094   |
| TIC glcm DependenceVariance | 0.169  | -0.528 | -0.392 | 0.094  | 0.377  | 0.131  | -0.02  | 0.001  | 0.009  | 0.113   | -0.025  | 0.005   | 0.077   | -0.064  | 0.059   | -0.041  | -0.014  | 0.087   | -0.029  | -0.027  | 0.005   | -0.035  | 0.015   | -0.04   | 0.001   | 0.084   | -0.076  | 0.018   | -0.012  | 0.064   | 0.071   | -0.005  |
| TIC glcm JointAverage       | 0.278  | 0.61   | -0.098 | -0.037 | 0.039  | 0.016  | 0.136  | 0.193  | 0.178  | -0.12   | -0.014  | 0.078   | 0.042   | 0.157   | 0.069   | 0.039   | 0.072   | -0.031  | 0.09    | -0.009  | -0.04   | 0.102   | 0.013   | -0.085  | -0.07   | -0.021  | 0.105   | -0.027  | -0.084  | -0.107  | -0.061  | 0.082   |

| TIC feature name                       | TIC F1 | TIC F2 | TIC F3 | TIC F4 | TIC F5 | TIC F6 | TIC F7 | TIC F8 | TIC F9 | TIC F10 | TIC F11 | TIC F12 | TIC F13 | TIC F14 | TIC F15 | TIC F16 | TIC F17 | TIC F18 | TIC F19 | TIC F20 | TIC F21 | TIC F22 | TIC F23 | TIC F24 | TIC F25 | TIC F26 | TIC F27 | TIC F28 | TIC F29 | TIC F30 | TIC F31 | TIC F32 |
|----------------------------------------|--------|--------|--------|--------|--------|--------|--------|--------|--------|---------|---------|---------|---------|---------|---------|---------|---------|---------|---------|---------|---------|---------|---------|---------|---------|---------|---------|---------|---------|---------|---------|---------|
| TIC glcm Idn                           | 0.64   | -0.168 | -0.213 | 0.082  | 0.101  | 0.098  | 0.129  | 0.098  | 0.216  | 0.134   | 0.009   | -0.05   | 0.167   | -0.037  | 0.018   | 0.007   | 0.034   | 0.025   | -0.045  | -0.031  | 0.004   | -0.037  | -0.045  | -0.122  | 0.055   | 0.022   | 0.111   | -0.01   | -0.115  | 0.05    | 0.05    | -0.008  |
| TIC glcm ClusterShade                  | 0.094  | 0.243  | 0.082  | 0.124  | 0.011  | 0.029  | 0.117  | 0.548  | 0.013  | -0.039  | 0.137   | -0.037  | 0.068   | -0.015  | -0.027  | 0.054   | 0.095   | 0.025   | -0.114  | 0.015   | 0.003   | 0.034   | 0.065   | 0.03    | 0.447   | 0.047   | 0.085   | 0.027   | -0.004  | 0.036   | -0.04   | 0.008   |
| TIC glcm Correlation                   | 0.527  | -0.078 | -0.221 | 0.005  | 0.135  | 0.191  | 0.032  | 0.034  | 0.028  | 0.241   | 0.074   | -0.024  | -0.176  | 0.127   | 0.085   | 0.116   | -0.167  | -0.007  | -0.012  | -0.002  | 0.008   | -0.111  | 0.082   | 0.004   | 0.203   | 0.043   | 0.227   | -0.02   | -0.102  | -0.062  | 0.062   | -0.055  |
| TIC glcm ClusterTendency               | 0.148  | 0.658  | 0.008  | 0.019  | 0.011  | 0.198  | -0.003 | 0.256  | 0.069  | 0.057   | 0.054   | -0.007  | -0.041  | 0.265   | 0.106   | 0.045   | -0.002  | -0.01   | -0.034  | -0.03   | 0.032   | -0.05   | 0.08    | 0.029   | 0.064   | 0.048   | 0.079   | 0.055   | -0.001  | -0.039  | 0.065   | -0.079  |
| TIC glcm InverseVariance               | 0.077  | -0.688 | -0.256 | 0.044  | 0.2    | 0.106  | 0.022  | 0.024  | 0.063  | 0.22    | 0.022   | -0.046  | 0.046   | -0.07   | 0.047   | -0.057  | -0.033  | 0.017   | 0.036   | -0.043  | 0.011   | -0.042  | 0.021   | -0.047  | 0.026   | 0.092   | 0.001   | -0.031  | -0.053  | 0.083   | 0.032   | -0.032  |
| TIC glcm SumEntropy                    | 0.565  | 0.55   | -0.078 | -0.001 | 0.011  | 0.027  | -0.004 | 0.119  | 0.033  | 0.01    | 0.044   | 0.001   | -0.075  | 0.158   | 0.004   | 0.044   | -0.003  | -0.036  | -0.009  | -0.047  | -0.019  | -0.023  | 0.005   | 0.036   | 0.031   | 0.029   | 0.072   | 0.035   | 0.049   | 0.028   | -0.004  | -0.008  |
| TIC glcm MaximumProbability            | -0.745 | -0.324 | 0.058  | 0.007  | 0.055  | 0.089  | 0.025  | 0.031  | -0.02  | 0.027   | 0.022   | -0.014  | 0.029   | -0.041  | 0.024   | -0.012  | 0.039   | 0.029   | -0.007  | -0.034  | 0.025   | -0.046  | 0.062   | -0.054  | -0.018  | 0.037   | -0.008  | -0.023  | -0.041  | 0.001   | 0.037   | -0.01   |
| TIC glcm DifferenceVariance            | 0.059  | 0.636  | 0.107  | 0.023  | 0.004  | 0.095  | 0.033  | 0.378  | 0.118  | -0.142  | 0.001   | -0.054  | 0.041   | 0.158   | -0.001  | 0.012   | 0.056   | 0.003   | -0.154  | -0.03   | -0.01   | 0.053   | 0.013   | 0.021   | -0.047  | 0.002   | -0.068  | 0.06    | 0.025   | 0.061   | -0.056  | -0.072  |
| TIC glcm DifferenceEntropy             | 0.239  | 0.724  | 0.131  | -0.008 | -0.11  | 0.033  | -0.006 | 0.132  | 0.068  | -0.167  | 0.023   | 0.022   | -0.013  | 0.115   | -0.037  | 0.03    | 0.066   | -0.025  | -0.025  | -0.016  | -0.005  | 0.039   | -0.025  | 0.039   | -0.039  | -0.03   | -0.022  | 0.03    | 0.083   | 0.004   | -0.021  | 0.014   |
| TIC firstorder RootMeanSquared         | -0.142 | 0.497  | 0.097  | -0.195 | 0.116  | -0.11  | -0.061 | 0.108  | 0.069  | -0.052  | -0.034  | 0.547   | 0.001   | 0.053   | 0.105   | -0.006  | 0.023   | -0.013  | 0.037   | -0.002  | 0.061   | 0.074   | 0.024   | 0.025   | -0.066  | 0.029   | 0.059   | -0.012  | 0.006   | -0.014  | 0.005   | -0.001  |
| TIC firstorder Kurtosis                | 0.207  | -0.304 | -0.048 | 0.083  | 0.008  | 0.059  | 0.244  | 0.213  | 0.045  | -0.044  | 0.017   | -0.094  | 0.531   | -0.071  | -0.004  | -0.039  | 0.077   | 0.051   | -0.121  | -0.004  | 0.029   | -0.085  | -0.024  | -0.155  | 0.082   | 0.071   | 0.025   | 0.017   | -0.06   | 0.111   | 0.033   | 0.069   |
| TIC firstorder Maximum                 | 0.132  | -0.633 | 0.129  | -0.031 | 0.076  | 0.002  | 0.015  | 0.279  | 0.127  | -0.048  | -0.023  | 0.269   | 0.144   | 0.107   | 0.042   | 0.03    | 0.069   | 0.004   | -0.128  | -0.036  | 0.039   | 0.011   | -0.037  | -0.015  | 0.021   | 0.015   | 0.076   | 0.028   | 0.01    | 0.081   | 0.044   | -0.024  |
| TIC firstorder InterquartileRange      | 0.125  | 0.71   | 0.022  | -0.033 | 0.054  | 0.089  | -0.077 | 0.124  | 0.151  | 0.005   | 0.045   | -0.043  | -0.112  | 0.259   | 0.019   | 0.06    | 0.025   | 0.029   | 0.022   | -0.027  | 0.028   | -0.014  | 0.037   | 0.034   | -0.043  | 0.021   | 0.045   | 0.033   | 0.027   | -0.041  | 0.055   | -0.091  |
| TIC firstorder Minimum                 | -0.411 | 0.03   | 0.177  | -0.211 | -0.09  | 0.134  | -0.195 | 0.069  | 0.063  | 0.037   | -0.039  | 0.552   | -0.042  | -0.065  | 0.065   | -0.029  | -0.045  | 0.006   | -0.025  | 0.008   | 0.09    | -0.003  | 0.012   | 0.095   | -0.008  | 0.041   | -0.022  | 0.015   | 0.082   | 0.078   | 0.05    | -0.058  |
| TIC ngtdm Complexity                   | 0.151  | 0.584  | -0.005 | 0.04   | 0.004  | 0.05   | 0.061  | 0.498  | 0.064  | -0.049  | -0.014  | -0.013  | 0.053   | 0.153   | 0.034   | -0.001  | 0.076   | -0.035  | -0.148  | -0.038  | -0.017  | 0.027   | 0.053   | 0.008   | 0.003   | 0.038   | 0.039   | 0.036   | -0.001  | 0.034   | -0.041  | -0.015  |
| TIC ngtdm Strength                     | -0.297 | 0.397  | 0.16   | -0.028 | 0.063  | 0.113  | 0.01   | 0.163  | 0.433  | -0.133  | 0.024   | -0.125  | 0.054   | 0.061   | -0.001  | 0.256   | -0.012  | 0.057   | -0.133  | 0.043   | 0.058   | -0.03   | 0.025   | -0.014  | 0.058   | -0.079  | 0.125   | 0.057   | -0.056  | -0.056  | 0.087   | -0.008  |
| TIC ngtdm Busyess                      | 0.304  | -0.459 | -0.206 | 0.08   | 0.309  | 0.051  | -0.106 | 0.063  | 0.328  | 0.077   | -0.06   | 0.004   | -0.101  | -0.087  | 0.067   | -0.046  | -0.025  | 0.017   | -0.03   | 0.05    | 0.04    | 0.019   | 0.024   | 0.083   | 0.014   | 0.041   | -0.232  | -0.012  | 0.078   | -0.003  | 0.004   | -0.082  |
| TIC ngtdm Contrast                     | -0.323 | 0.531  | 0.223  | -0.001 | 0.044  | 0.02   | -0.055 | 0.021  | 0.347  | -0.153  | -0.001  | -0.018  | -0.072  | 0.154   | -0.005  | 0.12    | -0.004  | 0.13    | 0.004   | 0.021   | 0.044   | 0.008   | -0.006  | 0.05    | -0.086  | -0.011  | -0.092  | -0.008  | 0.044   | -0.064  | 0.009   | -0.114  |
| TIC glszm SZNU                         | 0.396  | 0.287  | -0.102 | 0.121  | 0.018  | 0.094  | 0.009  | 0.134  | 0.616  | -0.038  | -0.013  | 0.024   | 0.045   | 0.05    | 0.03    | -0.044  | 0.027   | -0.005  | -0.027  | 0.004   | -0.02   | -0.014  | -0.003  | -0.009  | -0.037  | -0.016  | -0.02   | 0.012   | 0.012   | -0.051  | -0.028  | 0.021   |
| TIC glszm ZoneEntropy                  | 0.669  | 0.282  | -0.289 | 0.074  | 0.144  | 0.076  | 0.028  | 0.094  | 0.112  | 0.056   | -0.018  | 0.01    | -0.006  | 0.086   | 0.009   | 0.027   | -0.004  | -0.03   | -0.04   | -0.028  | 0.041   | 0.049   | 0.02    | -0.001  | -0.008  | 0.022   | 0.011   | 0.034   | 0.02    | 0.018   | 0.012   | 0       |
| TIC glszm LAHGLE                       | 0.248  | -0.111 | -0.354 | 0.024  | 0.642  | 0.083  | 0.065  | 0.017  | 0.18   | -0.033  | -0.01   | 0.039   | -0.009  | -0.043  | 0.043   | 0.018   | -0.015  | 0.003   | 0.046   | 0.011   | -0.007  | 0.078   | 0.011   | -0.06   | -0.034  | 0.046   | 0.045   | 0.013   | -0.077  | -0.062  | -0.015  | 0.03    |
| TIC wav LHH gldm SDLGLE                | -0.735 | -0.236 | 0.023  | -0.036 | 0.089  | 0.006  | -0.063 | 0.039  | 0.042  | -0.042  | 0.045   | -0.03   | -0.113  | 0.062   | -0.007  | 0.065   | 0.072   | -0.031  | 0.036   | -0.072  | -0.057  | -0.043  | -0.016  | 0.023   | 0.019   | 0.085   | 0.118   | -0.081  | 0.007   | -0.009  | -0.051  | 0.033   |
| TIC wav LHH gldm DependenceEntropy     | 0.541  | 0.427  | -0.317 | 0.056  | 0.008  | 0.051  | 0.075  | 0.047  | 0.158  | 0.096   | -0.05   | 0.001   | -0.117  | -0.081  | -0.04   | -0.074  | 0.007   | 0.023   | 0.021   | 0.018   | -0.015  | 0.017   | -0.051  | 0.008   | 0.031   | 0.076   | -0.08   | 0.02    | -0.08   | 0.07    | 0.001   | 0.045   |
| TIC wav LHH gldm LDHGLE                | 0.342  | 0.228  | -0.235 | 0.117  | 0.113  | 0.026  | 0.493  | 0.15   | 0.223  | 0.128   | 0.05    | 0.048   | 0.022   | 0.008   | 0.077   | -0.127  | -0.072  | 0.041   | -0.08   | 0.088   | 0.02    | 0.017   | 0.072   | -0.033  | 0.026   | -0.03   | -0.051  | 0.172   | -0.047  | 0.02    | 0.025   | -0.054  |
| TIC wav LHH gldm DependenceVariance    | 0.212  | -0.56  | -0.354 | 0.046  | 0.296  | 0.016  | -0.025 | 0.036  | 0.036  | -0.003  | 0.028   | -0.007  | 0.008   | 0.291   | 0.055   | -0.008  | 0.041   | 0.053   | -0.029  | -0.018  | 0.004   | 0       | 0       | 0.039   | -0.001  | 0.009   | -0.033  | 0.014   | -0.092  | 0.068   | -0.006  | 0.058   |
| TIC wav LHH gldm Idm                   | 0.585  | -0.068 | 0.026  | -0.024 | 0.06   | 0.08   | 0.156  | 0.064  | 0.193  | 0.091   | 0.123   | 0.054   | 0.333   | 0.012   | -0.038  | -0.136  | -0.125  | 0.079   | -0.085  | 0.137   | 0.098   | 0.019   | 0.009   | 0.096   | -0.046  | -0.094  | -0.02   | 0.084   | -0.052  | -0.058  | 0.041   | -0.02   |
| TIC wav LHH gldm Imc1                  | 0.637  | -0.225 | -0.313 | 0.021  | 0.026  | 0.006  | -0.06  | 0.043  | 0.252  | 0.001   | 0.003   | 0.031   | 0.001   | 0.05    | 0.026   | -0.117  | 0.01    | -0.183  | -0.01   | -0.043  | -0.026  | -0.007  | 0.014   | 0.014   | -0.047  | 0.059   | 0.029   | -0.035  | 0.034   | -0.031  | -0.048  | -0.023  |
| TIC wav LHH gldm MaximumProbability    | -0.061 | -0.694 | -0.151 | 0.001  | 0.196  | 0.076  | -0.043 | 0.05   | 0.081  | -0.017  | 0.055   | 0.016   | 0.086   | 0.322   | 0.029   | 0.027   | 0.013   | 0.03    | -0.067  | -0.056  | -0.007  | -0.034  | 0.023   | 0.002   | -0.026  | 0.016   | 0.026   | 0.033   | 0.052   | -0.01   | -0.002  | 0.031   |
| TIC wav LHH gldm JointEntropy          | 0.227  | 0.733  | 0.077  | 0.015  | 0.141  | 0.055  | 0.069  | 0.013  | 0.089  | 0.078   | -0.03   | -0.007  | -0.062  | -0.188  | -0.037  | -0.05   | -0.001  | -0.028  | 0.039   | 0.017   | -0.004  | 0.026   | -0.044  | -0.026  | 0.065   | 0.035   | -0.05   | -0.045  | 0.011   | 0.046   | 0.015   | -0.03   |
| TIC wav LHH firstorder RootMeanSquared | -0.016 | 0.383  | -0.235 | -0.047 | 0.016  | 0.053  | -0.075 | 0.031  | 0.076  | 0.083   | -0.092  | 0.025   | 0.034   | 0.001   | 0.127   | 0.614   | -0.003  | 0.099   | -0.007  | -0.068  | 0.061   | 0.038   | -0.01   | 0.035   | 0.069   | -0.024  | -0.028  | 0.024   | 0.007   | 0.045   | -0.022  | -0.063  |
| TIC wav LHH firstorder Kurtosis        | 0.167  | -0.132 | 0.273  | 0.064  | 0.019  | 0.176  | 0.368  | 0.012  | 0.043  | 0.057   | 0.02    | -0.004  | 0.505   | 0.146   | -0.025  | -0.06   | -0.178  | 0.09    | -0.061  | 0.126   | 0.02    | 0.012   | -0.04   | 0.072   | -0.002  | -0.069  | 0.016   | 0.02    | -0.076  | -0.115  | 0.056   | -0.019  |

| TIC feature name                          | TIC F1 | TIC F2 | TIC F3 | TIC F4 | TIC F5 | TIC F6 | TIC F7 | TIC F8 | TIC F9 | TIC F10 | TIC F11 | TIC F12 | TIC F13 | TIC F14 | TIC F15 | TIC F16 | TIC F17 | TIC F18 | TIC F19 | TIC F20 | TIC F21 | TIC F22 | TIC F23 | TIC F24 | TIC F25 | TIC F26 | TIC F27  | TIC F28 | TIC F29 | TIC F30 | TIC F31 | TIC F32 |
|-------------------------------------------|--------|--------|--------|--------|--------|--------|--------|--------|--------|---------|---------|---------|---------|---------|---------|---------|---------|---------|---------|---------|---------|---------|---------|---------|---------|---------|----------|---------|---------|---------|---------|---------|
| TIC wav LHH firstorder Maximum            | 0.186  | 0.561  | 0.222  | -0.009 | 0.057  | 0.022  | 0.281  | 0.012  | 0.161  | 0.185   | 0.012   | -0.021  | 0.24    | -0.08   | 0.011   | -0.067  | -0.067  | 0.136   | 0.007   | 0.069   | -0.007  | 0.041   | -0.079  | 0.08    | 0.123   | -0.01   | 0.01     | 0.003   | -0.023  | 0.039   | 0.093   | 0.022   |
| TIC wav LHH firstorder Mean               | -0.035 | 0.119  | -0.332 | -0.045 | 0.018  | 0.028  | -0.137 | 0.069  | 0.051  | 0.044   | -0.096  | 0.008   | 0.024   | 0.015   | 0.13    | 0.664   | 0.02    | 0.047   | -0.018  | -0.059  | 0.033   | 0.033   | 0.011   | 0.057   | 0.02    | -0.047  | 0.016    | 0.027   | -0.003  | -0.004  | -0.047  | -0.049  |
| TIC wav LHH firstorder Skewness           | -0.001 | -0.074 | 0.099  | 0.031  | 0.045  | 0.191  | -0.157 | 0.002  | 0.078  | 0.132   | -0.106  | -0.007  | 0.595   | -0.02   | 0.073   | 0.02    | 0.08    | -0.039  | 0.105   | -0.075  | -0.142  | 0.091   | -0.189  | 0.17    | 0.054   | 0.033   | 0.046    | -0.093  | -0.043  | -0.014  | 0.085   | 0.031   |
| TIC wav LHH firstorder InterquartileRange | -0.093 | 0.744  | 0.129  | -0.013 | 0.062  | 0.142  | 0.019  | -0.01  | 0.049  | 0.051   | -0.067  | 0.021   | -0.034  | -0.133  | 0.012   | -0.004  | -0.015  | 0.077   | 0.051   | -0.023  | 0.069   | -0.029  | -0.037  | -0.086  | 0.102   | 0.055   | -0.118   | -0.044  | 0.019   | 0.095   | 0.013   | -0.034  |
| TIC wav LHH firstorder Median             | -0.133 | 0.063  | -0.256 | -0.084 | 0.008  | -0.02  | -0.003 | 0.042  | 0.103  | -0.041  | 0.015   | -0.084  | -0.163  | 0.007   | 0.003   | 0.599   | 0.017   | 0.291   | -0.022  | 0.085   | 0.196   | -0.05   | 0.157   | -0.023  | -0.012  | 0.006   | 0.054    | -0.076  | -0.001  | -0.063  | -0.019  | 0.083   |
| TIC wav LHH ngtdm Contrast                | -0.337 | 0.497  | 0.181  | -0.039 | 0.023  | 0.163  | -0.034 | 0.081  | 0.332  | -0.034  | -0.099  | 0.026   | -0.082  | -0.119  | 0.031   | 0.099   | -0.062  | 0.185   | 0.044   | 0.004   | 0.073   | -0.063  | -0.106  | -0.062  | 0.142   | 0.003   | -0.103   | -0.002  | 0.007   | 0.115   | -0.04   | 0.006   |
| TIC wav LHH glszm SALGLE                  | -0.526 | -0.49  | -0.126 | -0.074 | 0.002  | 0.032  | -0.084 | 0.002  | 0.075  | -0.043  | 0.059   | 0.004   | -0.061  | 0.243   | 0.006   | 0.039   | 0.062   | -0.032  | 0.026   | -0.091  | -0.041  | -0.028  | -0.047  | 0.021   | 0.011   | 0.083   | 0.117    | -0.035  | 0.134   | -0.025  | -0.049  | 0.041   |
| TIC wav LHH glszm ZoneEntropy             | 0.456  | 0.555  | -0.117 | 0.026  | 0.136  | 0.042  | 0.126  | 0.013  | 0.206  | 0.072   | -0.043  | 0.044   | -0.08   | -0.178  | -0.051  | -0.073  | -0.008  | -0.007  | -0.008  | -0.037  | -0.02   | 0.109   | -0.026  | 0.006   | -0.001  | 0.01    | -0.069   | 0.019   | 0.013   | -0.061  | -0.013  | -0.051  |
| TIC wav LHH glszm GLNUN                   | -0.16  | -0.707 | -0.089 | 0.002  | 0.19   | 0.066  | -0.103 | 0.03   | 0.049  | -0.038  | 0.005   | -0.004  | 0.146   | 0.246   | 0.062   | 0.019   | 0.005   | -0.037  | -0.02   | -0.084  | 0.003   | -0.069  | 0.048   | -0.042  | -0.031  | 0.002   | 0.013    | 0.017   | 0.013   | -0.028  | -0.004  | 0.015   |
| TIC wav LHH glszm LAHGLE                  | 0.156  | -0.336 | -0.25  | 0.082  | 0.671  | 0.043  | -0.029 | 0.021  | 0.08   | -0.032  | -0.007  | 0.055   | -0.024  | 0.033   | 0.015   | 0.027   | 0.02    | 0.043   | -0.023  | 0       | 0.003   | 0.033   | 0.021   | 0.001   | 0.003   | -0.045  | 0.029    | 0.013   | -0.045  | 0.052   | 0.009   | 0.028   |
| TIC wav LHH glszm GrayLevelVariance       | 0.129  | 0.712  | 0.064  | 0.009  | 0.014  | 0.041  | 0.212  | 0.086  | 0.032  | 0.131   | 0.002   | 0.044   | 0.042   | -0.047  | 0.003   | -0.003  | -0.059  | 0.155   | 0.016   | 0.016   | 0.041   | 0.054   | -0.049  | -0.021  | 0.12    | 0.062   | -0.082   | 0.019   | 0.022   | 0.104   | 0.066   | -0.056  |
| TIC wav LHH glszm SZNUN                   | -0.009 | 0.45   | 0.408  | 0.013  | 0.049  | -0.04  | 0.028  | 0.048  | -0.11  | 0.064   | 0.062   | -0.114  | 0.073   | 0.004   | -0.025  | 0.085   | -0.077  | 0.158   | 0.055   | 0.24    | 0.089   | -0.133  | -0.019  | -0.068  | 0.085   | 0.084   | -0.013   | 0.016   | -0.077  | 0.242   | 0.053   | 0.077   |
| TIC wav HLL glrlm LRHGLE                  | 0.129  | 0.315  | -0.005 | -0.007 | 0.054  | 0.042  | 0.201  | 0.662  | 0.072  | -0.013  | 0.038   | -0.061  | 0.047   | -0.014  | 0.011   | -0.063  | 0.043   | -0.041  | -0.227  | 0.015   | -0.002  | 0.001   | -0.045  | 0.042   | 0.036   | 0.026   | 0.023    | 0.056   | 0.032   | 0.037   | -0.101  | -0.031  |
| TIC wav HLL glldm SDLGLE                  | -0.797 | -0.076 | 0.022  | 0.073  | 0.045  | 0.015  | -0.027 | 0.037  | 0.029  | -0.043  | -0.031  | -0.007  | -0.026  | 0.013   | 0.009   | 0.029   | -0.008  | 0.055   | 0.054   | 0.134   | -0.028  | -0.035  | 0.039   | -0.051  | -0.008  | -0.014  | 0.059    | -0.038  | -0.008  | 0.047   | 0.011   | -0.024  |
| TIC wav HLL glldm DependenceEntropy       | 0.67   | 0.3    | -0.278 | -0.025 | 0.039  | 0.049  | -0.035 | 0.209  | 0.062  | 0.048   | 0.012   | 0.03    | 0.015   | 0.036   | -0.005  | -0.081  | 0.016   | -0.019  | 0.005   | 0.018   | 0.056   | 0.001   | -0.053  | -0.019  | -0.003  | -0.01   | -0.066   | -0.025  | 0.025   | -0.019  | -0.027  | -0.011  |
| TIC wav HLL glldm LDJGLE                  | -0.697 | -0.232 | -0.062 | 0.041  | 0.024  | 0.082  | -0.045 | 0.043  | 0.048  | -0.023  | -0.085  | -0.042  | -0.112  | 0.015   | 0.081   | 0.015   | -0.05   | 0.051   | 0.175   | 0.102   | -0.059  | -0.052  | -0.011  | -0.046  | 0.02    | 0.022   | 0.017    | -0.093  | -0.034  | 0.074   | -0.142  | 0.002   |
| TIC wav HLL glldm DependenceVariance      | 0.231  | -0.492 | -0.404 | 0.033  | 0.366  | 0.129  | -0.05  | 0.004  | -0.04  | 0.064   | -0.035  | -0.026  | 0.16    | 0.038   | 0.029   | 0.037   | -0.012  | 0.043   | 0.054   | -0.021  | -0.006  | -0.003  | -0.02   | 0.002   | 0.027   | 0.136   | -0.045   | -0.002  | 0.036   | 0.083   | 0.023   | 0.014   |
| TIC wav HLL glcm ldn                      | 0.522  | -0.187 | -0.276 | 0.047  | 0.132  | 0.064  | 0.234  | 0.219  | 0.135  | 0.093   | 0.008   | -0.095  | 0.121   | -0.088  | -0.056  | -0.029  | 0.055   | -0.09   | 0.075   | 0.056   | 0.053   | 0.071   | -0.147  | 0.114   | 0.056   | 0.12    | 0.028    | 0.037   | 0.098   | 0.109   | -0.068  | 0.001   |
| TIC wav HLL glcm ClusterShade             | -0.08  | -0.189 | 0.073  | 0.016  | 0.011  | 0.195  | 0.012  | -0.36  | 0.015  | 0.023   | -0.17   | 0.116   | -0.011  | -0.023  | 0.028   | 0.028   | -0.005  | 0.036   | 0.608   | 0.009   | 0.015   | 0.087   | 0.021   | 0.028   | -0.018  | 0.075   | -0.01    | -0.024  | 0.016   | -0.054  | 0.132   | 0.046   |
| TIC wav HLL glcm InverseVariance          | 0.03   | -0.667 | -0.269 | 0.1    | 0.195  | 0.157  | 0.004  | 0.053  | 0.102  | 0.123   | -0.033  | -0.003  | 0.065   | 0.03    | 0.002   | 0.021   | -0.025  | -0.018  | 0.013   | -0.03   | -0.043  | 0.065   | -0.029  | 0.079   | 0.039   | 0.15    | -0.018   | 0.004   | 0.063   | 0.111   | 0.045   | -0.044  |
| TIC wav HLL glcm SumEntropy               | 0.469  | 0.601  | -0.021 | -0.095 | 0.106  | 0.102  | 0.009  | 0.189  | 0.018  | -0.015  | 0.014   | -0.005  | -0.039  | 0.026   | -0.026  | -0.083  | 0.031   | -0.048  | -0.012  | -0.013  | 0.044   | -0.077  | -0.039  | -0.038  | -0.029  | -0.076  | -0.056   | -0.011  | 0.04    | 0.004   | -0.022  | 0.055   |
| TIC wav HLL glcm ClusterProminence        | 0.023  | 0.231  | 0.031  | -0.004 | 0.045  | 0.011  | 0.032  | 0.766  | 0.012  | 0.043   | -0.019  | 0.07    | -0.045  | 0.009   | -0.02   | -0.001  | -0.04   | 0       | 0.045   | -0.027  | 0.011   | -0.035  | -0.053  | 0.021   | 0.045   | 0.018   | 0.006    | -0.038  | -0.036  | -0.076  | 0.076   | 0.01    |
| TIC wav HLL glcm DifferenceVariance       | 0.065  | 0.374  | 0.074  | -0.022 | 0.007  | 0.004  | 0.016  | 0.706  | 0.047  | 0.045   | 0.036   | 0.069   | -0.033  | -0.019  | -0.013  | -0.028  | -0.019  | -0.031  | -0.012  | -0.027  | 0.057   | -0.075  | -0.083  | -0.059  | 0.009   | -0.064  | -0.033   | -0.046  | -0.029  | -0.041  | 0.044   | 0.027   |
| TIC wav HLL firstorder RootMeanSquared    | 0.129  | 0.308  | 0.321  | -0.179 | 0.032  | 0.099  | 0.164  | 0.46   | 0.002  | 0.044   | 0.001   | -0.019  | -0.122  | 0.001   | -0.071  | -0.138  | 0.071   | 0.082   | 0.143   | 0.003   | 0.118   | -0.129  | 0.126   | -0.16   | 0.024   | -0.084  | 0.006    | 0.002   | 0.067   | 0.156   | 0.09    | -0.038  |
| TIC wav HLL firstorder Kurtosis           | 0.199  | -0.224 | -0.169 | 0.124  | 0.269  | 0.139  | 0.408  | 0.268  | 0.013  | 0.036   | -0.006  | -0.203  | 0.18    | -0.123  | -0.073  | -0.05   | 0.082   | -0.08   | 0.052   | 0.074   | -0.046  | 0.095   | -0.129  | 0.082   | -0.014  | 0.028   | 0.067    | 0.06    | 0.092   | 0.175   | -0.13   | -0.023  |
| TIC wav HLL firstorder Maximum            | 0.174  | 0.389  | 0.036  | 0.003  | 0.048  | 0.054  | 0.21   | 0.546  | 0.017  | 0.03    | -0.048  | -0.05   | 0.05    | -0.091  | -0.028  | -0.054  | 0.018   | -0.036  | 0.287   | 0.088   | 0.057   | -0.046  | -0.079  | -0.099  | 0.002   | -0.068  | 0.012    | 0.028   | -0.016  | 0.006   | -0.031  | 0.069   |
| TIC wav HLL firstorder 10Percentile       | -0.025 | -0.584 | -0.069 | 0.045  | 0.089  | 0.004  | 0.11   | 0.305  | 0.198  | -0.011  | -0.115  | -0.08   | 0.022   | 0.025   | -0.02   | -0.032  | 0.026   | 0.041   | 0.099   | -0.003  | -0.1    | 0.122   | 0.087   | 0.193   | 0.07    | 0.219   | 0.076    | 0.048   | 0.042   | 0.052   | -0.039  | -0.024  |
| TIC wav HLL firstorder Skewness           | -0.099 | 0.108  | 0.151  | -0.035 | 0.197  | 0.205  | 0.149  | 0.011  | 0.055  | -0.066  | -0.14   | -0.004  | 0.025   | -0.041  | 0.115   | -0.061  | -0.046  | -0.022  | 0.674   | 0.113   | -0.012  | -0.039  | -0.038  | -0.12   | -0.001  | -0.009  | 0.012    | 0.043   | -0.015  | 0.048   | 0.001   | -0.007  |
| TIC wav HLL firstorder Range              | 0.227  | 0.425  | 0.007  | 0.003  | 0.012  | 0.004  | 0.237  | 0.599  | 0.035  | 0.017   | 0.02    | -0.046  | 0.07    | -0.063  | -0.022  | -0.06   | 0.041   | -0.07   | -0.025  | 0.036   | 0.063   | -0.033  | -0.088  | -0.02   | 0.02    | -0.016  | 0.00E+00 | 0.033   | 0.018   | 0.011   | -0.068  | 0.027   |



| TIC feature name                          | TIC F1 | TIC F2 | TIC F3 | TIC F4 | TIC F5 | TIC F6 | TIC F7 | TIC F8 | TIC F9 | TIC F10 | TIC F11 | TIC F12 | TIC F13 | TIC F14 | TIC F15 | TIC F16 | TIC F17 | TIC F18  | TIC F19 | TIC F20 | TIC F21 | TIC F22  | TIC F23 | TIC F24 | TIC F25 | TIC F26 | TIC F27 | TIC F28 | TIC F29 | TIC F30 | TIC F31 | TIC F32 |
|-------------------------------------------|--------|--------|--------|--------|--------|--------|--------|--------|--------|---------|---------|---------|---------|---------|---------|---------|---------|----------|---------|---------|---------|----------|---------|---------|---------|---------|---------|---------|---------|---------|---------|---------|
| TIC wav HLL firstorder 90Percentile       | 0.073  | 0.627  | 0.247  | -0.173 | 0.064  | 0.128  | 0.008  | 0.257  | 0.113  | 0.001   | 0.025   | 0.063   | -0.083  | -0.023  | -0.004  | -0.103  | 0.042   | 0.041    | -0.014  | -0.017  | 0.095   | -0.138   | 0.035   | -0.144  | -0.037  | -0.133  | -0.1    | -0.014  | 0.002   | -0.001  | 0.013   | 0.019   |
| TIC wav HLL firstorder Median             | 0.069  | -0.121 | 0.329  | -0.138 | 0.043  | 0.146  | 0.151  | 0.139  | 0.103  | 0.035   | 0.137   | -0.137  | -0.107  | 0.151   | -0.175  | -0.025  | 0.094   | 0.104    | -0.157  | -0.111  | 0.25    | -0.061   | 0.186   | -0.227  | -0.055  | -0.096  | 0.075   | 0.034   | 0.103   | 0.27    | 0.07    | -0.077  |
| TIC wav HLL ngtdm Complexity              | 0.08   | 0.331  | 0.017  | -0.001 | 0.028  | 0.031  | 0.031  | 0.73   | 0.05   | 0.054   | -0.009  | 0.085   | -0.033  | 0.004   | -0.012  | -0.008  | -0.038  | -0.02    | 0.016   | -0.039  | 0.03    | -0.06    | -0.05   | -0.029  | 0.023   | -0.004  | -0.016  | -0.062  | -0.031  | -0.073  | 0.064   | 0.028   |
| TIC wav HLL ngtdm Strength                | -0.2   | 0.318  | 0.157  | -0.032 | -0.03  | 0.017  | 0.052  | 0.546  | 0.351  | 0.004   | 0.016   | -0.027  | 0.023   | -0.101  | -0.074  | 0.032   | -0.01   | 0.017    | 0.035   | 0.118   | 0.091   | -0.098   | -0.142  | -0.043  | -0.021  | -0.144  | -0.015  | -0.008  | -0.044  | -0.003  | 0.007   | 0.015   |
| TIC wav HLL ngtdm Busyness                | 0.112  | -0.441 | -0.197 | 0.127  | 0.198  | 0.051  | -0.137 | 0.157  | 0.406  | -0.025  | -0.077  | 0.134   | -0.167  | 0.042   | 0.125   | 0.021   | -0.082  | 0.086    | 0.048   | -0.025  | -0.075  | 0.095    | 0.12    | -0.038  | -0.032  | 0.035   | 0.034   | 0.051   | -0.111  | 0.089   | 0.02    | -0.033  |
| TIC wav HLL ngtdm Contrast                | -0.435 | 0.393  | 0.254  | -0.061 | 0.052  | 0.077  | -0.056 | 0.179  | 0.347  | -0.092  | 0.035   | 0.062   | -0.04   | -0.043  | 0.012   | 0.065   | -0.018  | 0.093    | -0.003  | 0.039   | 0.128   | -0.057   | -0.03   | -0.129  | -0.061  | -0.205  | -0.053  | -0.008  | -0.017  | -0.011  | 0.038   | -0.02   |
| TIC wav HLL glszm LAHGLE                  | 0.171  | -0.083 | -0.215 | 0.041  | 0.663  | 0.074  | 0.106  | 0.32   | 0.061  | 0.018   | 0.036   | -0.084  | 0.065   | -0.055  | -0.037  | -0.018  | 0.008   | -0.024   | -0.127  | -0.01   | -0.014  | 0.00E+00 | -0.027  | 0.021   | 0.021   | 0.045   | 0.035   | 0.047   | 0.077   | 0.001   | -0.05   | -0.029  |
| TIC wav LHL glrlm LRHGLE                  | 0.155  | 0.488  | 0.006  | 0.049  | 0.024  | 0.04   | 0.037  | 0.531  | 0.157  | -0.088  | 0.01    | -0.005  | 0.115   | 0.052   | 0.119   | -0.05   | -0.027  | 0.042    | -0.087  | 0.005   | -0.036  | 0.087    | 0.123   | 0.048   | -0.019  | 0.013   | 0.001   | 0.061   | 0.081   | 0.036   | -0.085  | -0.005  |
| TIC wav LHL gldm SDLGLE                   | -0.808 | -0.103 | 0.012  | 0.037  | 0.015  | 0.036  | -0.007 | 0.036  | 0.038  | 0.03    | 0.006   | 0.026   | -0.04   | -0.021  | -0.003  | -0.015  | 0.041   | -0.015   | -0.026  | -0.037  | -0.009  | -0.064   | 0.042   | -0.011  | 0.029   | 0.06    | 0.012   | 0.005   | -0.069  | 0.041   | 0.009   | 0.031   |
| TIC wav LHL gldm LDHGLE                   | 0.274  | 0.291  | -0.201 | 0.082  | 0.035  | 0.1    | -0.007 | 0.444  | 0.267  | -0.104  | 0.029   | 0.009   | 0.19    | 0.014   | 0.164   | -0.024  | 0.009   | 0.042    | -0.067  | 0.036   | -0.032  | 0.114    | 0.165   | 0.06    | -0.049  | 0.043   | -0.029  | 0.076   | 0.13    | 0.048   | -0.095  | -0.032  |
| TIC wav LHL gldm Ldn                      | 0.575  | -0.105 | -0.2   | 0.047  | 0.003  | 0.096  | 0.05   | 0.135  | 0.298  | 0.058   | 0.018   | 0.003   | 0.248   | 0.02    | 0.143   | -0.083  | -0.023  | 0.055    | 0.053   | 0.01    | -0.026  | 0.03     | 0.187   | -0.046  | -0.031  | 0.005   | -0.021  | -0.057  | 0.105   | -0.02   | -0.04   | -0.04   |
| TIC wav LHL gldm ClusterShade             | -0.061 | -0.298 | 0.049  | 0.019  | 0.025  | 0.046  | 0.046  | 0.723  | 0.043  | 0.025   | 0.052   | -0.018  | -0.021  | -0.047  | 0.03    | -0.039  | -0.085  | 0.019    | 0.004   | 0.057   | 0.098   | -0.096   | -0.067  | -0.061  | 0.035   | -0.042  | -0.023  | -0.01   | -0.041  | -0.076  | -0.008  | 0.039   |
| TIC wav LHL gldm SumEntropy               | 0.402  | 0.651  | 0.023  | 0.009  | 0.121  | 0.091  | 0.053  | 0.118  | 0.003  | -0.16   | -0.069  | 0.038   | -0.107  | 0.069   | 0.029   | -0.02   | 0.023   | -0.039   | 0.045   | -0.016  | -0.014  | 0.026    | -0.038  | 0.043   | -0.01   | 0.01    | -0.031  | 0.037   | 0.05    | 0.05    | -0.011  | 0.041   |
| TIC wav LHL gldm DifferenceVariance       | 0.027  | 0.615  | 0.118  | 0.082  | 0.005  | 0.017  | 0.044  | 0.411  | 0.137  | -0.144  | -0.127  | 0.089   | 0.032   | 0.119   | 0.065   | -0.041  | -0.034  | 0.044    | -0.038  | -0.061  | -0.055  | 0.006    | 0.064   | 0.035   | -0.025  | -0.016  | -0.086  | 0.015   | 0.038   | 0.006   | 0.025   | -0.035  |
| TIC wav LHL firstorder RootMeanSquared    | 0.045  | 0.252  | 0.534  | 0.166  | 0.037  | 0.009  | 0.091  | 0.032  | 0.229  | -0.049  | -0.046  | -0.069  | 0.041   | 0.053   | -0.128  | -0.099  | -0.055  | 0.064    | 0.056   | 0.235   | 0.14    | -0.023   | 0.089   | -0.011  | 0.018   | -0.053  | -0.069  | 0.199   | 0.079   | 0.029   | 0.14    | 0.131   |
| TIC wav LHL firstorder Kurtosis           | 0.293  | -0.235 | -0.12  | 0.097  | 0.059  | 0.228  | 0.026  | 0.246  | 0.071  | 0.029   | 0.033   | 0.064   | 0.442   | -0.02   | 0.174   | 0.005   | 0.022   | 0.078    | 0.045   | -0.048  | -0.034  | -0.046   | 0.19    | -0.035  | -0.047  | 0.053   | -0.061  | -0.021  | 0.253   | -0.006  | -0.015  | -0.048  |
| TIC wav LHL firstorder Maximum            | 0.225  | 0.617  | 0.137  | 0.115  | 0.068  | 0.036  | 0.156  | 0.139  | 0.018  | -0.076  | -0.127  | 0.123   | 0.008   | 0.147   | 0.095   | -0.12   | -0.045  | 0.058    | 0.079   | -0.024  | 0.011   | -0.131   | 0.21    | 0.031   | 0.023   | -0.041  | -0.078  | 0.011   | 0.014   | -0.072  | -0.047  | 0.009   |
| TIC wav LHL firstorder 10Percentile       | -0.017 | -0.701 | -0.041 | 0      | 0.068  | 0.093  | -0.016 | 0.189  | 0.149  | 0.23    | 0.105   | -0.049  | 0.066   | -0.087  | -0.025  | -0.041  | -0.016  | 0.001    | 0.007   | 0.135   | 0.019   | -0.025   | 0.015   | -0.096  | 0.056   | -0.009  | 0.069   | -0.02   | 0.039   | -0.048  | 0.031   | 0.025   |
| TIC wav LHL firstorder Mean               | 0.051  | -0.222 | 0.497  | 0.141  | 0.046  | 0.051  | 0.07   | -0.2   | 0.119  | 0.086   | 0.062   | -0.12   | 0.049   | -0.024  | -0.154  | -0.109  | -0.032  | 0.036    | 0.075   | 0.306   | 0.136   | -0.023   | 0.069   | -0.031  | 0.044   | -0.054  | 0.003   | 0.189   | 0.079   | 0.008   | 0.131   | 0.163   |
| TIC wav LHL firstorder InterquartileRange | -0.133 | 0.656  | 0.147  | 0.032  | 0.056  | 0.148  | 0.022  | 0.14   | 0.172  | -0.232  | -0.155  | 0.047   | -0.092  | 0.062   | -0.018  | 0.062   | -0.037  | 0.053    | 0.014   | -0.041  | 0.096   | -0.047   | -0.005  | 0.041   | -0.018  | -0.01   | -0.106  | 0.094   | -0.031  | 0.068   | 0.002   | 0.04    |
| TIC wav LHL firstorder Median             | 0.287  | -0.083 | 0.452  | 0.094  | 0.063  | 0.166  | 0.064  | 0.002  | 0.165  | 0.039   | 0.026   | -0.202  | 0.077   | 0.079   | -0.2    | 0.02    | 0.067   | 0.031    | 0.04    | 0.241   | 0.16    | 0.051    | 0.116   | 0.053   | -0.027  | -0.04   | 0.062   | 0.177   | 0.122   | 0.159   | 0.049   | 0.089   |
| TIC wav LHL ngtdm Strength                | -0.377 | 0.423  | 0.214  | 0.039  | -0.04  | 0.029  | -0.006 | 0.126  | 0.383  | -0.201  | -0.15   | 0.01    | 0.067   | 0.026   | 0.086   | 0.151   | -0.068  | 0.16     | 0.018   | 0.069   | -0.033  | 0.011    | 0.037   | 0.06    | -0.007  | -0.067  | -0.059  | 0.041   | 0.053   | -0.016  | 0.035   | -0.007  |
| TIC wav LHL ngtdm Busyness                | 0.149  | -0.41  | -0.241 | 0.037  | 0.567  | 0.008  | -0.015 | 0.072  | 0.145  | 0.168   | -0.025  | -0.059  | -0.082  | -0.06   | -0.1    | -0.024  | -0.029  | 0.023    | -0.069  | -0.006  | 0.008   | 0.008    | -0.037  | -0.012  | 0.033   | -0.038  | 0.026   | -0.009  | -0.106  | 0.03    | 0.001   | 0.004   |
| TIC wav LHL glszm ZoneVariance            | 0.095  | -0.32  | -0.21  | 0.037  | 0.718  | 0.008  | -0.053 | 0.004  | 0.018  | 0.02    | 0.021   | -0.097  | 0.041   | 0.001   | 0.012   | -0.015  | -0.018  | 0.00E+00 | -0.01   | -0.015  | 0.011   | -0.005   | 0.008   | -0.027  | 0.008   | 0.011   | -0.03   | -0.022  | 0.016   | -0.001  | 0.019   | -0.011  |
| TIC wav LHL glszm ZoneEntropy             | 0.619  | 0.369  | -0.251 | 0.073  | 0.052  | 0.036  | 0.046  | 0.124  | 0.071  | -0.121  | -0.092  | 0.048   | -0.05   | 0.085   | 0.039   | 0.008   | 0.011   | 0.009    | 0.023   | -0.003  | 0.017   | 0.128    | 0.036   | 0.06    | -0.024  | 0.01    | -0.122  | 0.057   | 0.028   | 0.043   | 0.027   | 0.033   |
| TIC wav LHL glszm LAHGLE                  | -0.243 | -0.379 | -0.192 | 0.023  | 0.636  | 0.008  | -0.052 | 0      | 0.022  | 0.081   | 0.009   | -0.095  | -0.038  | 0.034   | 0.017   | -0.055  | -0.002  | -0.01    | -0.058  | -0.031  | 0.01    | 0.015    | 0.014   | -0.02   | 0.038   | 0.013   | -0.03   | -0.029  | 0.002   | 0.005   | 0.024   | 0.008   |
| TIC wav LHL glszm LAHGLE                  | 0.283  | -0.002 | -0.305 | 0.086  | 0.432  | 0.101  | -0.045 | 0.35   | 0.196  | -0.081  | 0.028   | -0.029  | 0.211   | -0.006  | 0.138   | -0.008  | -0.01   | 0.042    | -0.037  | 0.013   | -0.008  | 0.062    | 0.14    | 0.026   | -0.035  | 0.062   | -0.061  | 0.053   | 0.123   | 0.041   | -0.048  | -0.034  |
| TIC wav LHL glszm SZUN                    | -0.186 | 0.568  | 0.49   | 0.015  | 0.142  | 0.077  | 0.023  | 0.037  | 0.089  | -0.126  | -0.013  | 0.052   | -0.046  | 0.024   | -0.008  | -0.058  | -0.043  | 0.019    | -0.037  | -0.005  | 0.047   | -0.14    | -0.037  | 0.032   | 0.039   | -0.019  | 0.039   | 0.001   | 0.012   | -0.001  | -0.036  | 0.019   |
| TIC wav HHH glrlm SRLGLE                  | -0.508 | -0.5   | -0.024 | -0.006 | 0.149  | 0.029  | -0.148 | 0.033  | 0.048  | -0.052  | -0.001  | 0.018   | 0.075   | 0.194   | 0.034   | -0.006  | -0.117  | -0.127   | -0.036  | -0.018  | 0.005   | -0.025   | 0.035   | -0.084  | 0.009   | 0.006   | 0.073   | 0.059   | 0.131   | -0.125  | 0.043   | -0.044  |
| TIC wav HHH gldm SDLGLE                   | -0.661 | -0.281 | 0.165  | 0.028  | 0.023  | 0.068  | -0.136 | 0.004  | 0.113  | -0.072  | -0.034  | 0.038   | 0.034   | 0.078   | 0.005   | 0.001   | -0.143  | -0.101   | -0.03   | 0.098   | 0       | -0.029   | 0.052   | -0.066  | -0.007  | -0.059  | 0.093   | 0.047   | 0.059   | -0.162  | 0.052   | -0.074  |
| TIC wav HHH gldm DependenceEntropy        | 0.543  | 0.472  | -0.215 | 0.06   | 0.042  | 0.023  | 0.187  | 0.035  | 0.079  | 0.155   | -0.041  | 0.008   | -0.051  | -0.099  | -0.117  | -0.016  | -0.025  | 0.072    | -0.022  | 0.025   | 0.088   | 0.026    | -0.019  | -0.001  | 0.023   | 0.066   | -0.012  | -0.042  | 0.078   | 0.009   | -0.021  | -0.013  |

| TIC feature name                       | TIC F1 | TIC F2 | TIC F3 | TIC F4 | TIC F5 | TIC F6 | TIC F7 | TIC F8 | TIC F9 | TIC F10 | TIC F11 | TIC F12 | TIC F13 | TIC F14 | TIC F15 | TIC F16 | TIC F17 | TIC F18 | TIC F19 | TIC F20 | TIC F21 | TIC F22 | TIC F23 | TIC F24 | TIC F25 | TIC F26 | TIC F27 | TIC F28 | TIC F29 | TIC F30 | TIC F31 | TIC F32 |
|----------------------------------------|--------|--------|--------|--------|--------|--------|--------|--------|--------|---------|---------|---------|---------|---------|---------|---------|---------|---------|---------|---------|---------|---------|---------|---------|---------|---------|---------|---------|---------|---------|---------|---------|
| TIC wav HHH gldm LDHGLE                | 0.209  | 0.077  | -0.159 | 0.071  | 0.038  | 0.11   | 0.724  | 0.028  | 0.095  | 0.094   | -0.011  | -0.057  | -0.022  | -0.066  | -0.01   | -0.011  | 0.023   | -0.007  | -0.072  | 0.034   | -0.037  | 0.076   | -0.037  | 0.032   | 0.053   | 0.019   | -0.01   | 0.027   | -0.044  | 0.032   | -0.156  | -0.01   |
| TIC wav HHH gldm DependenceVariance    | 0.193  | -0.577 | -0.399 | -0.013 | 0.282  | 0.03   | -0.037 | 0.006  | 0.008  | -0.034  | -0.01   | 0.045   | 0.005   | 0.24    | 0.014   | 0.026   | 0.046   | 0.036   | -0.042  | 0.036   | 0.006   | 0.045   | -0.012  | 0.022   | -0.005  | 0.042   | -0.043  | 0.078   | -0.029  | 0.03    | 0.014   | -0.006  |
| TIC wav HHH gldm Idm                   | 0.682  | -0.046 | -0.06  | 0.001  | 0.024  | 0.064  | 0.169  | 0.026  | 0.168  | -0.041  | 0.152   | -0.037  | -0.036  | 0.014   | -0.044  | -0.044  | 0.21    | 0.002   | 0.016   | 0.073   | -0.063  | 0.04    | -0.038  | 0.082   | -0.072  | 0.066   | -0.114  | -0.031  | -0.088  | 0.115   | -0.104  | 0.073   |
| TIC wav HHH gldm ClusterShade          | -0.051 | 0      | -0.014 | -0.058 | 0.018  | 0.046  | -0.744 | 0.046  | 0.05   | -0.111  | 0.072   | 0.009   | -0.026  | 0.094   | 0.001   | -0.065  | 0.061   | 0.031   | 0.063   | 0.077   | -0.204  | -0.031  | 0.065   | -0.055  | -0.034  | 0.018   | -0.033  | -0.076  | 0.036   | 0.003   | 0.089   | 0.065   |
| TIC wav HHH gldm Correlation           | 0.191  | -0.097 | 0.055  | 0.024  | 0.017  | 0.112  | 0.141  | 0.084  | 0.023  | -0.035  | 0.131   | 0.079   | 0.066   | 0.036   | -0.067  | 0.013   | 0.114   | 0       | 0       | 0.086   | -0.183  | 0.065   | -0.048  | 0.668   | 0.027   | 0.013   | 0.058   | -0.006  | 0.058   | 0.095   | -0.039  | 0.003   |
| TIC wav HHH gldm Imc1                  | 0.615  | -0.172 | -0.321 | -0.026 | 0.013  | 0.004  | -0.188 | 0.098  | 0.225  | -0.039  | 0.035   | 0.029   | 0.003   | 0.043   | 0.069   | -0.093  | 0.02    | -0.197  | 0.025   | -0.066  | -0.105  | -0.002  | -0.016  | 0       | -0.023  | 0.032   | 0.027   | -0.002  | 0.01    | 0.003   | -0.008  | -0.03   |
| TIC wav HHH gldm MaximumProbability    | -0.076 | -0.696 | -0.144 | 0.004  | 0.202  | 0.085  | -0.069 | 0.029  | 0.075  | -0.044  | 0.034   | 0.022   | 0.089   | 0.303   | 0.007   | 0.055   | 0.012   | -0.02   | -0.043  | 0.015   | -0.014  | 0.015   | 0.014   | -0.001  | -0.03   | 0.011   | -0.023  | 0.086   | -0.028  | -0.044  | -0.012  | -0.032  |
| TIC wav HHH firstorder RootMeanSquared | -0.193 | 0.308  | 0.072  | -0.002 | 0.033  | 0.147  | -0.072 | 0.098  | 0.019  | 0.149   | -0.091  | -0.025  | 0.057   | -0.008  | -0.093  | 0.155   | -0.002  | 0.642   | 0.005   | 0.001   | -0.033  | -0.007  | -0.015  | -0.043  | 0.041   | 0.041   | -0.026  | -0.039  | 0.027   | 0.032   | 0.057   | 0.02    |
| TIC wav HHH firstorder Kurtosis        | 0.238  | -0.075 | 0.088  | 0.069  | 0.064  | 0.207  | 0.559  | 0.018  | 0.008  | -0.042  | 0.119   | -0.087  | -0.079  | 0.035   | 0.029   | -0.046  | 0.211   | -0.052  | 0.036   | 0.019   | -0.146  | 0.027   | -0.133  | 0.163   | -0.02   | 0.053   | -0.044  | -0.004  | -0.055  | 0.126   | -0.259  | 0.087   |
| TIC wav HHH firstorder Maximum         | 0.204  | 0.459  | 0.252  | 0.149  | 0.066  | 0.071  | 0.427  | 0.053  | 0.097  | 0.116   | 0.129   | -0.104  | -0.034  | -0.04   | -0.03   | -0.08   | 0.048   | 0.032   | 0.018   | 0.067   | 0.012   | 0.049   | -0.019  | -0.059  | -0.026  | 0.067   | -0.117  | -0.067  | 0.067   | 0.065   | 0.119   | 0.06    |
| TIC wav HHH firstorder Mean            | -0.237 | -0.083 | -0.076 | -0.073 | 0.045  | 0.081  | -0.389 | 0.092  | 0.062  | 0.003   | -0.112  | 0.027   | 0.089   | 0.007   | -0.071  | 0.148   | 0.046   | 0.549   | 0.004   | -0.017  | -0.158  | -0.02   | -0.004  | -0.005  | 0.01    | -0.016  | 0.036   | 0.005   | -0.042  | 0       | 0.025   | 0.016   |
| TIC wav HHH firstorder Skewness        | -0.159 | -0.029 | 0.008  | -0.008 | 0.021  | -0.26  | -0.256 | 0.021  | 0.028  | 0.007   | 0.029   | 0.016   | 0.12    | 0.019   | -0.017  | -0.103  | -0.097  | 0.055   | 0.138   | 0.052   | -0.082  | 0.002   | 0.135   | -0.168  | -0.111  | -0.01   | 0.007   | 0.043   | -0.001  | 0.035   | 0.591   | -0.019  |
| TIC wav HHH firstorder Median          | 0.271  | -0.127 | 0.162  | 0.09   | 0.019  | 0.01   | -0.126 | 0.004  | 0.202  | -0.073  | -0.011  | -0.01   | 0.07    | -0.024  | -0.108  | 0.179   | -0.021  | 0.341   | -0.099  | 0.26    | -0.091  | 0.048   | -0.034  | 0.058   | 0.035   | -0.057  | -0.059  | 0.087   | 0.029   | -0.28   | -0.122  | 0.142   |
| TIC wav HHH ngldm Strength             | -0.245 | 0.284  | 0.25   | 0.045  | -0.03  | 0.045  | 0.498  | 0.107  | -0.26  | 0.034   | 0.032   | -0.11   | -0.099  | -0.072  | -0.028  | 0.111   | 0.065   | 0.253   | 0.054   | 0.147   | 0.024   | -0.021  | -0.034  | -0.033  | 0.01    | 0.063   | -0.091  | -0.011  | 0.016   | 0.056   | -0.01   | 0.065   |
| TIC wav HHH ngldm Contrast             | -0.317 | 0.426  | 0.222  | 0.008  | 0.013  | 0.179  | 0.057  | 0.013  | 0.266  | 0.088   | -0.076  | -0.014  | -0.014  | -0.04   | -0.035  | 0.147   | -0.125  | 0.315   | -0.008  | 0.062   | 0.261   | 0.008   | -0.029  | -0.063  | 0.013   | 0.009   | -0.032  | -0.004  | 0.076   | 0.01    | -0.002  | -0.017  |
| TIC wav HHH gldm ZoneVariance          | 0.126  | -0.343 | -0.233 | 0.04   | 0.699  | 0.006  | -0.056 | 0.013  | 0.044  | -0.041  | 0.01    | 0.002   | -0.023  | 0.075   | 0.024   | 0.015   | 0.021   | 0.015   | -0.011  | 0.004   | 0.006   | 0.023   | 0.007   | 0.005   | -0.008  | -0.031  | -0.027  | 0.006   | -0.038  | 0.015   | 0.001   | 0.012   |
| TIC wav HHH gldm ZoneEntropy           | 0.409  | 0.627  | 0.081  | 0.062  | 0.132  | 0.003  | 0.173  | 0.025  | 0.093  | 0.093   | -0.015  | -0.013  | -0.026  | -0.19   | -0.06   | -0.022  | -0.007  | 0.022   | -0.003  | -0.034  | 0.031   | 0       | 0.002   | -0.046  | -0.008  | 0.015   | 0.037   | -0.021  | 0.071   | -0.042  | -0.019  | 0.002   |
| TIC wav HHH gldm GrayLevelVariance     | 0.089  | 0.494  | 0.073  | 0.125  | 0.046  | 0.041  | 0.536  | 0.078  | 0.075  | 0.198   | 0.024   | -0.06   | -0.058  | -0.051  | -0.055  | 0.007   | -0.04   | 0.126   | 0.017   | 0.044   | 0.098   | 0.032   | -0.023  | -0.028  | 0.026   | 0.09    | -0.077  | -0.049  | 0.075   | 0.022   | 0.05    | -0.009  |
| TIC wav LLH glrlm SRLGLE               | -0.543 | -0.383 | 0.046  | 0.023  | 0.055  | 0.107  | -0.022 | 0.013  | 0.027  | -0.061  | 0.019   | 0.149   | -0.104  | 0.079   | 0.096   | -0.016  | 0.018   | -0.032  | -0.042  | -0.054  | 0.046   | -0.006  | 0.011   | 0.051   | -0.075  | 0.076   | 0.004   | -0.027  | 0.375   | -0.021  | -0.005  | 0.077   |
| TIC wav LLH glrlm LRHGLE               | 0.119  | 0.577  | -0.227 | -0.062 | 0.021  | -0.05  | -0.022 | 0.004  | 0.042  | 0.433   | -0.068  | 0.025   | 0.149   | 0.025   | -0.064  | 0.006   | -0.019  | 0.014   | -0.076  | -0.014  | -0.112  | 0.047   | 0.068   | 0.033   | 0.043   | 0.02    | 0.055   | 0.059   | -0.052  | -0.011  | 0.003   | -0.032  |
| TIC wav LLH gldm SDLGLE                | -0.775 | -0.152 | 0.073  | 0.044  | 0.076  | 0.071  | -0.003 | -0.01  | 0.013  | -0.063  | 0.045   | 0.054   | -0.06   | -0.005  | 0.029   | -0.006  | 0.044   | -0.055  | -0.024  | -0.005  | 0.068   | -0.059  | 0.01    | 0.04    | -0.059  | 0.057   | -0.012  | -0.03   | 0.112   | 0.004   | -0.003  | 0.054   |
| TIC wav LLH gldm DependenceEntropy     | 0.591  | 0.294  | -0.447 | 0.018  | 0.06   | -0.08  | 0.011  | 0.025  | 0.143  | 0.115   | -0.032  | 0.03    | 0.006   | 0       | 0.017   | -0.049  | 0.007   | 0.026   | 0.004   | 0.028   | 0.013   | 0.04    | 0.01    | 0.03    | -0.009  | 0.047   | -0.059  | -0.009  | -0.042  | 0.003   | -0.018  | -0.023  |
| TIC wav LLH gldm LDLGLE                | 0.013  | -0.556 | -0.115 | 0.055  | 0.198  | 0.152  | -0.044 | 0.049  | 0.089  | -0.031  | -0.019  | 0.176   | 0.015   | 0.127   | 0.127   | 0.017   | 0.042   | 0.036   | -0.04   | -0.133  | 0.007   | -0.008  | 0.024   | 0.019   | -0.066  | 0.068   | -0.005  | -0.005  | 0.413   | 0.023   | 0.02    | 0.076   |
| TIC wav LLH gldm LDHGLE                | 0.242  | 0.063  | -0.502 | 0.036  | 0.095  | 0.005  | -0.017 | 0.048  | 0.022  | 0.419   | -0.093  | -0.104  | 0.156   | 0.143   | -0.268  | -0.046  | -0.03   | 0.068   | -0.097  | -0.014  | -0.058  | 0.034   | 0.004   | 0.022   | 0.046   | -0.027  | 0.036   | 0.105   | -0.123  | -0.014  | 0.012   | -0.007  |
| TIC wav LLH gldm DependenceVariance    | 0.197  | -0.552 | -0.324 | 0.077  | 0.306  | 0.061  | -0.041 | 0.03   | 0.061  | 0.02    | -0.008  | -0.05   | 0.193   | 0.249   | -0.024  | -0.003  | 0.009   | 0.065   | 0.015   | -0.078  | 0.025   | -0.085  | 0.007   | -0.063  | -0.021  | 0.025   | -0.041  | 0.038   | -0.039  | 0.07    | 0.014   | 0.051   |
| TIC wav LLH gldm Idn                   | 0.576  | -0.225 | -0.214 | 0.061  | 0.127  | 0.171  | -0.004 | 0.068  | 0.044  | 0.109   | -0.104  | 0.011   | 0.151   | 0.236   | -0.071  | -0.049  | -0.091  | 0.049   | -0.117  | -0.004  | -0.002  | 0.062   | 0.021   | -0.151  | 0.027   | -0.108  | 0.061   | 0.121   | -0.029  | 0.003   | 0.112   | 0.005   |
| TIC wav LLH gldm ClusterShade          | -0.214 | 0.101  | 0.069  | -0.134 | 0.089  | 0.044  | 0.038  | 0.097  | 0.105  | 0.099   | 0.049   | 0.08    | 0.182   | 0.08    | 0.635   | 0.222   | -0.022  | -0.096  | 0.059   | 0.009   | 0.058   | -0.008  | 0.032   | -0.002  | -0.101  | -0.017  | 0.057   | 0.094   | 0.001   | 0.024   | -0.062  | 0.047   |
| TIC wav LLH gldm Correlation           | 0.194  | -0.294 | -0.335 | -0.009 | 0.089  | 0.056  | -0.065 | 0.058  | 0.088  | -0.295  | -0.03   | 0.089   | 0.036   | 0.355   | -0.109  | 0.039   | -0.07   | -0.208  | -0.141  | -0.007  | 0.039   | -0.01   | 0.095   | 0.102   | -0.01   | -0.141  | 0.086   | 0.018   | 0.075   | 0.023   | 0.051   | -0.083  |
| TIC wav LLH gldm MaximumProbability    | -0.194 | -0.597 | -0.042 | 0.084  | 0.152  | 0.164  | -0.071 | 0.023  | 0.137  | -0.033  | 0.015   | 0.014   | 0.277   | 0.3     | -0.07   | 0.052   | -0.043  | 0       | 0       | -0.062  | 0.018   | -0.135  | 0.019   | -0.072  | -0.033  | -0.016  | 0.019   | 0.059   | -0.003  | -0.01   | -0.007  | 0.057   |

| TIC feature name                          | TIC F1 | TIC F2 | TIC F3 | TIC F4 | TIC F5 | TIC F6 | TIC F7 | TIC F8 | TIC F9 | TIC F10 | TIC F11 | TIC F12 | TIC F13 | TIC F14 | TIC F15 | TIC F16 | TIC F17 | TIC F18 | TIC F19 | TIC F20  | TIC F21 | TIC F22 | TIC F23 | TIC F24 | TIC F25 | TIC F26 | TIC F27 | TIC F28 | TIC F29 | TIC F30 | TIC F31 | TIC F32 |
|-------------------------------------------|--------|--------|--------|--------|--------|--------|--------|--------|--------|---------|---------|---------|---------|---------|---------|---------|---------|---------|---------|----------|---------|---------|---------|---------|---------|---------|---------|---------|---------|---------|---------|---------|
| TIC wav LLH firstorder Maximum            | 0.127  | 0.645  | -0.086 | -0.042 | 0.002  | 0.012  | 0.051  | 0.043  | 0.146  | 0.334   | -0.011  | 0.085   | 0.096   | 0.042   | 0.208   | 0.022   | -0.016  | 0.049   | -0.042  | 0.023    | 0.026   | 0.077   | 0.014   | -0.047  | 0.029   | 0.02    | -0.035  | 0.065   | -0.015  | 0.012   | 0.062   | 0.019   |
| TIC wav LLH firstorder Mean               | 0.338  | -0.481 | -0.058 | -0.007 | 0.14   | 0.223  | 0.005  | 0.162  | 0.058  | 0.18    | -0.187  | -0.108  | 0.084   | 0.064   | -0.052  | -0.01   | -0.034  | 0.071   | 0.007   | 0.062    | 0.048   | -0.175  | -0.036  | -0.198  | 0.116   | -0.094  | 0.108   | 0.059   | 0.052   | -0.061  | -0.046  | 0.072   |
| TIC wav LLH firstorder Skewness           | -0.141 | 0.11   | 0.194  | -0.128 | 0.037  | 0.069  | 0.124  | 0.063  | 0.148  | -0.043  | -0.044  | 0.327   | -0.08   | -0.162  | 0.544   | 0.052   | 0       | -0.04   | 0.012   | -0.02    | 0.029   | 0.108   | -0.043  | -0.057  | -0.03   | -0.094  | -0.04   | 0.038   | 0.133   | -0.031  | 0.014   | -0.097  |
| TIC wav LLH firstorder InterquartileRange | -0.299 | 0.669  | -0.027 | -0.093 | 0.057  | 0.211  | 0.013  | 0.106  | 0.001  | 0.055   | 0.005   | 0.103   | -0.012  | -0.121  | 0.098   | 0.044   | -0.002  | 0.01    | 0.023   | 0.006    | -0.032  | 0.027   | -0.006  | 0.037   | 0.026   | 0.113   | -0.096  | -0.106  | -0.031  | 0.029   | -0.022  | -0.065  |
| TIC wav LLH firstorder 90Percentile       | -0.153 | 0.67   | -0.074 | -0.15  | 0.027  | 0.169  | -0.021 | 0.005  | 0.014  | 0.24    | -0.064  | 0.052   | 0.099   | -0.128  | 0.149   | 0.054   | -0.025  | 0.013   | 0.01    | -0.031   | 0.005   | -0.09   | -0.02   | 0.034   | 0.109   | 0.007   | -0.058  | -0.025  | -0.047  | -0.009  | -0.018  | -0.022  |
| TIC wav LLH firstorder Median             | 0.455  | -0.367 | -0.12  | 0.093  | 0.116  | 0.282  | -0.007 | 0.115  | 0.003  | 0.143   | -0.069  | -0.15   | 0.017   | 0.142   | -0.174  | 0.006   | 0.023   | 0.082   | -0.003  | 0.168    | 0.019   | -0.132  | 0.007   | -0.129  | 0.051   | -0.014  | 0.111   | 0.003   | 0.055   | -0.07   | -0.013  | 0.123   |
| TIC wav LLH ngtdm Busyness                | 0.292  | -0.494 | -0.082 | 0.135  | 0.366  | 0.056  | -0.021 | 0.014  | 0.263  | -0.099  | -0.027  | 0.091   | -0.131  | -0.068  | 0.123   | 0.066   | -0.048  | -0.006  | 0.004   | -0.067   | -0.011  | -0.001  | 0.007   | -0.015  | -0.083  | 0.094   | 0.015   | -0.032  | 0.166   | 0.004   | -0.043  | -0.026  |
| TIC wav LLH ngtdm Contrast                | -0.695 | 0.325  | 0.027  | -0.025 | 0.026  | 0.154  | -0.007 | 0.027  | 0.013  | 0.055   | 0.049   | 0.058   | -0.028  | -0.094  | 0.101   | 0.083   | 0.032   | 0.044   | 0.011   | -0.065   | -0.017  | -0.048  | -0.017  | 0.036   | 0.049   | 0.104   | -0.093  | -0.058  | -0.044  | 0.048   | -0.025  | 0.016   |
| TIC wav LLH glszm SALGLE                  | -0.663 | -0.334 | -0.009 | 0.063  | 0.049  | 0.14   | -0.019 | 0.009  | 0.053  | -0.088  | 0.028   | 0.097   | 0.008   | 0.034   | 0.042   | 0.008   | 0.054   | -0.043  | -0.021  | -0.021   | 0.07    | -0.082  | 0.013   | 0.041   | -0.082  | 0.059   | 0.004   | -0.026  | 0.231   | 0.01    | 0.013   | 0.073   |
| TIC wav LLH glszm LAHGLE                  | 0.094  | -0.255 | -0.2   | 0.048  | 0.743  | 0.001  | -0.039 | 0.012  | 0.003  | 0.004   | 0.043   | -0.076  | 0.049   | 0.061   | -0.064  | 0.012   | -0.01   | -0.009  | 0.014   | -0.035   | -0.009  | -0.057  | -0.004  | -0.023  | 0.003   | -0.014  | 0.027   | 0.022   | 0.016   | -0.019  | -0.018  | 0.002   |
| TIC wav LLH glszm GrayLevelVariance       | -0.09  | 0.643  | -0.168 | -0.095 | 0.007  | 0.086  | -0.022 | 0.045  | 0.019  | 0.364   | -0.01   | 0.084   | 0.127   | 0.029   | 0.159   | 0.103   | 0.001   | -0.009  | -0.009  | 0.016    | -0.008  | -0.001  | 0.063   | 0.078   | -0.038  | 0.067   | 0.031   | 0.015   | -0.036  | -0.008  | -0.002  | 0.019   |
| TIC wav HLH glirm SRLGLE                  | -0.707 | -0.303 | -0.023 | 0.098  | 0.028  | 0.126  | -0.047 | 0.007  | 0.113  | -0.014  | -0.043  | 0.105   | -0.032  | 0.106   | 0.042   | -0.024  | -0.017  | -0.093  | -0.053  | -0.079   | 0       | 0.005   | 0.086   | -0.006  | 0.008   | 0.009   | 0.029   | -0.016  | 0.048   | 0.058   | 0.009   | 0.017   |
| TIC wav HLH glldm SDLGLE                  | -0.753 | -0.189 | 0.107  | 0.125  | -0.05  | 0.128  | -0.058 | 0.016  | 0.049  | -0.014  | -0.062  | 0.104   | 0.014   | 0.048   | -0.006  | 0.002   | -0.044  | -0.059  | -0.053  | 0        | -0.022  | 0.017   | 0.078   | -0.021  | -0.011  | -0.019  | 0.002   | -0.012  | -0.01   | -0.006  | -0.036  | -0.032  |
| TIC wav HLH glldm DependenceEntropy       | 0.545  | 0.411  | -0.362 | 0.021  | 0.038  | 0.072  | 0.048  | 0.016  | 0.101  | 0.215   | -0.041  | 0.011   | -0.022  | -0.041  | -0.038  | 0.003   | -0.026  | 0.04    | 0.018   | 0.021    | -0.014  | 0.054   | -0.068  | 0.017   | -0.001  | 0.05    | -0.046  | -0.037  | 0.056   | 0.026   | -0.027  | 0.004   |
| TIC wav HLH glldm LDJGLE                  | -0.302 | -0.549 | -0.195 | 0.043  | 0.145  | 0.046  | -0.06  | 0.044  | 0.044  | -0.004  | -0.027  | 0.134   | -0.07   | 0.348   | 0.103   | -0.038  | 0.062   | -0.033  | -0.078  | -0.121   | 0.024   | 0.028   | 0.032   | 0.025   | 0.029   | -0.02   | -0.003  | 0.019   | 0.152   | 0.083   | 0.02    | 0.086   |
| TIC wav HLH glldm DependenceVariance      | 0.163  | -0.552 | -0.351 | 0.025  | 0.337  | 0.022  | -0.004 | 0.012  | 0.019  | -0.035  | -0.012  | 0.034   | 0.024   | 0.33    | 0.007   | -0.017  | 0.019   | 0.011   | -0.014  | -0.032   | 0.025   | 0.037   | -0.022  | 0.023   | 0.027   | -0.021  | 0.003   | 0.055   | 0.054   | 0.049   | -0.023  | 0.036   |
| TIC wav HLH glcm Idm                      | 0.723  | -0.04  | -0.047 | -0.001 | 0.109  | 0.02   | 0.136  | 0.042  | 0.055  | 0.006   | 0.106   | -0.103  | 0.04    | 0.107   | -0.067  | -0.015  | 0.018   | 0.023   | 0.069   | -0.009   | 0.049   | 0.05    | -0.058  | 0.057   | -0.004  | 0.143   | 0.002   | 0.029   | -0.085  | -0.075  | -0.037  | -0.113  |
| TIC wav HLH glcm ClusterShade             | -0.018 | -0.136 | -0.144 | 0.045  | 0.104  | 0.091  | 0.009  | 0.231  | 0.019  | 0.286   | -0.088  | -0.173  | -0.068  | -0.169  | -0.517  | -0.087  | 0.012   | 0.102   | -0.153  | -0.074   | -0.11   | -0.003  | -0.145  | 0.036   | 0.009   | -0.199  | -0.025  | 0.029   | 0.064   | 0.019   | -0.07   | -0.058  |
| TIC wav HLH glcm Correlation              | 0.115  | 0.178  | -0.04  | -0.15  | 0.073  | 0.016  | 0.008  | 0.177  | 0.124  | 0.062   | 0.013   | 0.101   | -0.035  | 0.078   | 0.016   | 0.14    | -0.125  | -0.02   | -0.15   | 0.04     | 0.007   | 0.136   | 0.123   | 0.518   | -0.136  | -0.024  | -0.057  | -0.034  | -0.079  | -0.133  | -0.083  | -0.075  |
| TIC wav HLH glcm Inc1                     | 0.595  | -0.222 | -0.285 | 0.052  | 0.011  | 0.008  | -0.024 | 0.047  | 0.267  | -0.14   | 0.012   | 0.05    | 0.003   | 0.05    | 0.061   | -0.153  | -0.01   | -0.203  | -0.001  | -0.116   | -0.014  | 0.042   | 0.062   | 0.038   | -0.02   | 0.096   | 0.006   | -0.009  | 0.038   | 0.023   | -0.003  | -0.057  |
| TIC wav HLH glcm MaximumProbability       | -0.118 | -0.665 | -0.128 | 0.033  | 0.168  | 0.067  | 0.003  | 0.029  | 0.053  | -0.066  | 0.014   | 0.068   | 0.075   | 0.377   | -0.001  | 0.03    | -0.026  | -0.046  | -0.044  | -0.053   | 0.023   | 0.008   | -0.002  | 0.017   | 0.002   | -0.027  | 0.041   | 0.084   | 0.087   | -0.02   | -0.032  | 0.015   |
| TIC wav HLH glcm JointEntropy             | 0.241  | 0.703  | 0.041  | -0.033 | 0.122  | 0.057  | 0.022  | 0.023  | 0.104  | 0.216   | -0.009  | -0.014  | -0.014  | -0.22   | -0.012  | -0.03   | 0.008   | 0.006   | 0.03    | 0.033    | -0.022  | -0.018  | -0.038  | -0.023  | -0.011  | 0.01    | -0.062  | -0.071  | 0.003   | 0.014   | 0.013   | 0.025   |
| TIC wav HLH firstorder RootMeanSquared    | 0.383  | 0.194  | -0.071 | 0.133  | -0.04  | 0.1    | -0.018 | 0.059  | 0.054  | 0.159   | -0.061  | -0.02   | 0.055   | -0.022  | -0.053  | 0.006   | -0.043  | 0.036   | 0.006   | 0.002    | -0.012  | -0.005  | -0.635  | -0.031  | -0.125  | -0.043  | -0.025  | -0.034  | 0.01    | 0.004   | -0.036  | 0.032   |
| TIC wav HLH firstorder Kurtosis           | 0.316  | -0.132 | -0.062 | 0.082  | 0.316  | 0.075  | 0.498  | 0.041  | 0.115  | 0.07    | 0.062   | -0.156  | 0.031   | 0.139   | -0.102  | -0.025  | 0.036   | -0.094  | 0.167   | -0.036   | -0.005  | 0.002   | -0.136  | -0.014  | 0.058   | 0.077   | 0.005   | 0.068   | -0.049  | -0.106  | -0.064  | -0.049  |
| TIC wav HLH firstorder Maximum            | 0.247  | 0.547  | 0.032  | 0.054  | 0.014  | 0.05   | 0.259  | 0.035  | 0.169  | 0.382   | 0.003   | -0.118  | 0.018   | -0.046  | -0.075  | 0.005   | 0.014   | 0.058   | 0.08    | 0.00E+00 | -0.02   | -0.015  | -0.119  | 0.008   | -0.008  | 0.053   | -0.058  | -0.012  | 0.018   | -0.021  | -0.008  | -0.045  |
| TIC wav HLH firstorder Mean               | 0.381  | -0.095 | -0.085 | 0.177  | 0.039  | 0.118  | -0.038 | 0.024  | 0.063  | -0.068  | -0.055  | -0.029  | 0.035   | -0.015  | -0.061  | -0.058  | -0.038  | -0.002  | 0.001   | -0.032   | -0.02   | 0.012   | -0.656  | -0.023  | -0.109  | -0.038  | -0.031  | -0.001  | -0.002  | -0.007  | -0.049  | -0.009  |
| TIC wav HLH firstorder 90Percentile       | -0.005 | 0.686  | 0.06   | -0.045 | 0.058  | 0.061  | -0.011 | 0.03   | 0.013  | 0.343   | -0.016  | 0.017   | 0.021   | -0.112  | 0.002   | 0.128   | -0.007  | 0.129   | -0.012  | 0.049    | -0.001  | -0.04   | -0.145  | -0.058  | -0.048  | -0.013  | -0.055  | -0.078  | 0.009   | 0.04    | 0.014   | 0.075   |
| TIC wav HLH firstorder Median             | 0.526  | -0.065 | -0.007 | 0.086  | 0.03   | 0.039  | 0.023  | 0.058  | 0.03   | -0.061  | -0.09   | 0.061   | 0.072   | -0.002  | 0.099   | -0.179  | -0.126  | 0.028   | 0.067   | 0.09     | 0.118   | 0.053   | -0.481  | 0.057   | -0.058  | 0.08    | 0.05    | 0.049   | -0.048  | -0.019  | -0.101  | -0.003  |
| TIC wav HLH ngtdm Strength                | -0.282 | 0.436  | 0.182  | -0.067 | 0.013  | 0.047  | 0.129  | 0.01   | 0.282  | 0.288   | 0.008   | -0.109  | -0.073  | -0.066  | -0.078  | 0.169   | 0.047   | 0.306   | 0.065   | 0.113    | 0.053   | -0.04   | -0.102  | -0.034  | -0.035  | 0.029   | -0.025  | 0.006   | -0.02   | 0.002   | 0.009   | 0.039   |
| TIC wav HLH ngtdm Contrast                | -0.462 | 0.496  | 0.097  | -0.055 | -0.04  | 0.125  | -0.023 | 0.035  | 0.178  | 0.181   | -0.044  | 0.078   | 0.001   | -0.108  | 0.018   | 0.148   | -0.005  | 0.165   | -0.01   | 0.067    | 0.011   | -0.045  | -0.046  | -0.108  | -0.004  | -0.061  | -0.071  | -0.089  | 0.045   | 0.087   | 0.024   | 0.082   |
| TIC wav HLH glszm ZoneEntropy             | 0.497  | 0.538  | -0.173 | 0.023  | -0.04  | -0.03  | 0.074  | 0.005  | 0.183  | 0.138   | 0.005   | -0.03   | -0.053  | -0.153  | -0.105  | 0.021   | -0.01   | 0.031   | 0.061   | 0.061    | 0.016   | 0.033   | -0.062  | 0.033   | -0.054  | 0.036   | -0.02   | -0.016  | -0.006  | -0.056  | -0.024  | -0.044  |

| TIC feature name                          | TIC F1 | TIC F2 | TIC F3 | TIC F4 | TIC F5 | TIC F6 | TIC F7 | TIC F8 | TIC F9 | TIC F10 | TIC F11 | TIC F12 | TIC F13 | TIC F14 | TIC F15 | TIC F16 | TIC F17 | TIC F18 | TIC F19 | TIC F20 | TIC F21 | TIC F22 | TIC F23 | TIC F24 | TIC F25 | TIC F26 | TIC F27 | TIC F28 | TIC F29 | TIC F30 | TIC F31 | TIC F32 |
|-------------------------------------------|--------|--------|--------|--------|--------|--------|--------|--------|--------|---------|---------|---------|---------|---------|---------|---------|---------|---------|---------|---------|---------|---------|---------|---------|---------|---------|---------|---------|---------|---------|---------|---------|
| TIC wav HLH glszm LALGLE                  | 0.116  | -0.413 | -0.22  | 0.062  | 0.566  | 0.003  | -0.054 | 0.007  | 0.027  | -0.023  | -0.009  | 0.05    | -0.069  | 0.269   | 0.063   | -0.019  | 0.093   | 0.036   | -0.053  | -0.031  | 0.016   | 0.031   | -0.003  | 0.034   | 0.023   | -0.105  | -0.029  | 0.002   | -0.017  | 0.052   | 0.002   | 0.069   |
| TIC wav HLH glszm LAHGLE                  | 0.123  | -0.277 | -0.23  | 0.042  | 0.733  | 0.01   | -0.014 | 0.027  | 0.06   | -0.044  | 0.028   | -0.006  | -0.007  | 0.042   | -0.032  | 0.022   | -0.004  | -0.002  | 0.011   | -0.001  | -0.003  | 0.007   | -0.005  | -0.011  | 0.005   | -0.015  | 0.027   | 0.029   | -0.025  | -0.009  | -0.012  | 0.015   |
| TIC wav HLH glszm GrayLevelVariance       | 0.107  | -0.579 | -0.098 | -0.04  | 0      | 0.005  | 0.101  | 0.045  | 0.012  | 0.521   | -0.037  | -0.012  | 0.035   | -0.038  | -0.072  | 0.114   | -0.018  | 0.084   | 0.007   | 0.087   | 0.028   | 0.001   | -0.037  | 0.016   | -0.047  | -0.009  | 0.013   | -0.041  | 0.026   | 0.002   | 0.008   | 0.052   |
| TIC wav HLH glszm GLNU                    | 0.45   | 0.07   | -0.058 | 0.143  | 0.038  | 0.056  | 0.004  | 0.065  | 0.659  | -0.035  | -0.028  | -0.013  | 0.038   | -0.056  | 0.039   | -0.025  | 0.019   | 0.006   | -0.023  | -0.008  | -0.022  | -0.051  | -0.01   | -0.028  | -0.018  | 0.006   | -0.024  | -0.01   | -0.012  | -0.013  | -0.002  | -0.018  |
| TIC wav HLH glszm SZNUN                   | -0.094 | 0.447  | 0.385  | -0.062 | 0.041  | 0.073  | 0.079  | 0.07   | 0.059  | 0.396   | 0.003   | 0.012   | 0.05    | -0.103  | 0.023   | 0.03    | 0.013   | 0.163   | -0.129  | 0.067   | 0.006   | 0.01    | 0.016   | -0.149  | 0.101   | -0.008  | -0.124  | -0.011  | 0.014   | 0.118   | -0.009  | 0.07    |
| TIC wav HHL glrlm LRHGLE                  | 0.161  | 0.267  | 0.122  | 0.142  | 0.027  | 0.114  | 0.673  | 0.084  | 0.063  | -0.056  | -0.014  | 0.078   | 0.008   | 0.039   | 0.025   | -0.107  | -0.102  | -0.02   | 0.068   | -0.032  | 0.049   | -0.07   | 0.018   | -0.044  | 0.005   | -0.002  | 0.016   | -0.05   | 0.035   | -0.02   | 0.106   | 0.045   |
| TIC wav HHL gldm SDLGLE                   | -0.8   | -0.1   | -0.025 | 0.027  | 0.024  | 0.031  | -0.022 | 0.021  | 0.105  | 0.051   | 0.005   | 0.013   | -0.042  | 0.003   | 0.01    | 0       | 0.052   | 0.017   | -0.007  | -0.017  | -0.026  | 0       | 0.049   | -0.057  | 0.046   | 0.077   | -0.01   | 0.011   | -0.056  | 0.048   | -0.004  | 0.036   |
| TIC wav HHL gldm DependenceEntropy        | 0.685  | 0.354  | -0.148 | 0.08   | 0.03   | 0.048  | 0.157  | 0.066  | 0.01   | -0.108  | -0.014  | 0.025   | -0.037  | 0.072   | -0.042  | 0.006   | -0.006  | 0.018   | -0.028  | -0.011  | 0.04    | 0.021   | 0.011   | 0.084   | -0.014  | -0.002  | -0.006  | -0.006  | 0.089   | -0.015  | -0.025  | 0.046   |
| TIC wav HHL gldm LowGrayLevelEmphasis     | -0.781 | -0.145 | -0.065 | 0.024  | 0.008  | 0.037  | -0.033 | 0.013  | 0.111  | 0.066   | -0.007  | 0.004   | -0.053  | 0.018   | 0.031   | -0.02   | 0.055   | 0.004   | -0.025  | -0.036  | -0.016  | 0.014   | 0.05    | -0.06   | 0.038   | 0.077   | -0.041  | 0.002   | -0.082  | 0.068   | 0.014   | 0.027   |
| TIC wav HHL gldm LDLGLE                   | -0.485 | -0.387 | -0.237 | 0.007  | 0.21   | 0.023  | -0.083 | 0.024  | 0.063  | 0.133   | -0.058  | -0.068  | -0.064  | 0.078   | 0.131   | -0.09   | 0.046   | 0.005   | -0.103  | -0.041  | 0.024   | 0.116   | 0.049   | -0.049  | 0.052   | 0.055   | -0.172  | -0.053  | -0.164  | 0.112   | 0.08    | 0.012   |
| TIC wav HHL gldm LDHGLE                   | 0.213  | 0.1    | -0.031 | 0.152  | 0.024  | 0.064  | 0.717  | 0.018  | 0.115  | -0.059  | -0.011  | 0.077   | 0.026   | 0.042   | 0.027   | -0.073  | -0.091  | -0.048  | 0.085   | -0.021  | -0.009  | -0.054  | -0.001  | -0.057  | 0.022   | -0.007  | 0.042   | -0.016  | 0.079   | -0.033  | 0.091   | 0.021   |
| TIC wav HHL gldm Idn                      | 0.654  | -0.09  | -0.092 | -0.004 | 0.036  | 0.035  | 0.261  | 0.048  | 0.24   | 0.057   | 0.114   | -0.013  | 0.095   | 0.009   | -0.032  | -0.022  | 0.201   | -0.021  | 0.074   | -0.025  | -0.009  | -0.099  | 0.061   | 0.044   | 0.055   | -0.014  | -0.05   | 0.001   | 0.072   | 0.04    | -0.026  | -0.008  |
| TIC wav HHL gldm ClusterShade             | 0.092  | 0.152  | 0.041  | 0.111  | 0.009  | 0.014  | 0.566  | 0.452  | 0.003  | -0.037  | -0.001  | -0.072  | -0.005  | 0.004   | 0.032   | 0.026   | 0.165   | -0.118  | -0.068  | -0.061  | -0.023  | 0.039   | 0.113   | 0.067   | 0.077   | 0.015   | 0.034   | 0       | -0.033  | -0.062  | -0.032  | 0.002   |
| TIC wav HHL gldm Correlation              | 0.409  | 0.076  | 0.203  | -0.105 | 0.118  | -0.09  | 0.073  | 0.007  | 0.029  | -0.05   | -0.064  | -0.039  | 0.011   | -0.108  | 0.002   | -0.071  | 0.174   | -0.054  | -0.035  | -0.079  | -0.158  | -0.022  | -0.004  | 0.545   | 0.017   | 0.005   | -0.071  | -0.012  | 0.005   | -0.047  | -0.049  | 0.049   |
| TIC wav HHL gldm ClusterProminence        | 0.064  | 0.105  | 0.067  | 0.084  | 0.001  | 0.045  | 0.758  | 0.218  | 0.032  | -0.024  | -0.064  | 0.015   | 0.003   | -0.01   | 0.058   | -0.009  | -0.013  | -0.059  | 0.026   | -0.034  | 0.029   | 0.004   | 0.061   | -0.004  | 0.033   | -0.017  | 0.012   | -0.012  | -0.047  | -0.044  | 0.052   | -0.001  |
| TIC wav HHL firstorder RootMeanSquared    | 0.04   | 0.413  | 0.161  | 0.043  | 0.014  | 0.098  | 0.388  | 0.21   | 0.165  | -0.083  | -0.017  | 0.011   | -0.073  | 0.068   | 0.031   | 0.062   | 0.117   | 0.043   | -0.025  | -0.104  | 0.436   | 0.033   | 0.095   | -0.046  | 0.023   | 0.018   | 0.029   | -0.058  | 0.018   | 0.018   | -0.014  | 0.01    |
| TIC wav HHL firstorder Kurtosis           | 0.297  | -0.152 | 0.004  | 0.031  | 0.039  | 0.101  | 0.577  | 0.102  | 0.075  | -0.017  | 0.065   | -0.066  | 0.183   | -0.024  | -0.006  | -0.017  | 0.335   | -0.068  | 0.095   | -0.058  | -0.047  | -0.071  | 0.089   | 0.068   | 0.038   | -0.09   | 0.012   | 0.01    | 0.057   | 0.054   | -0.037  | -0.022  |
| TIC wav HHL firstorder Maximum            | 0.236  | 0.437  | 0.139  | 0.093  | 0.067  | 0.037  | 0.464  | 0.256  | 0.053  | -0.089  | 0.046   | 0.007   | 0.011   | 0.06    | -0.005  | 0.008   | 0.229   | -0.041  | -0.01   | -0.013  | 0.113   | -0.07   | 0.132   | 0.06    | 0.058   | -0.048  | -0.029  | 0.013   | -0.021  | 0.03    | -0.076  | 0.033   |
| TIC wav HHL firstorder Mean               | 0.024  | 0.242  | 0.076  | -0.025 | 0.012  | 0.052  | 0.256  | 0.102  | 0.124  | -0.016  | 0.027   | 0.007   | -0.089  | 0.062   | 0.068   | 0.122   | 0.197   | -0.004  | -0.031  | -0.154  | 0.601   | 0.107   | 0.083   | -0.139  | 0.064   | 0.014   | 0.071   | -0.04   | 0.03    | 0.012   | -0.035  | -0.022  |
| TIC wav HHL firstorder Skewness           | 0.053  | -0.018 | 0.07   | 0.004  | 0.026  | 0.123  | 0.153  | 0.221  | 0.03   | 0.024   | 0.152   | -0.019  | 0.009   | 0.016   | -0.012  | 0.063   | 0.687   | 0.008   | -0.117  | -0.148  | 0.033   | 0.103   | 0.152   | 0.095   | 0.049   | -0.026  | -0.014  | 0.002   | -0.023  | -0.032  | -0.057  | -0.031  |
| TIC wav HHL firstorder Range              | 0.249  | 0.453  | 0.164  | 0.124  | 0.062  | 0.083  | 0.525  | 0.189  | 0.063  | -0.101  | 0.026   | 0.037   | 0.01    | 0.065   | -0.007  | -0.052  | 0.085   | -0.019  | 0.023   | -0.009  | 0.092   | -0.1    | 0.082   | 0.03    | 0.025   | -0.033  | -0.004  | -0.022  | 0.027   | 0.016   | -0.008  | 0.051   |
| TIC wav HHL firstorder InterquartileRange | 0.027  | 0.624  | 0.226  | 0.072  | 0.051  | 0.175  | 0.084  | 0.179  | 0.204  | -0.168  | -0.037  | 0.081   | -0.041  | 0.032   | -0.023  | 0.014   | -0.074  | 0.084   | -0.036  | -0.036  | 0.228   | -0.064  | 0.023   | 0.069   | -0.026  | -0.042  | -0.01   | -0.041  | -0.038  | 0.033   | -0.024  | 0.058   |
| TIC wav HHL firstorder Median             | -0.043 | 0.095  | 0.012  | 0.01   | 0.007  | 0.041  | 0.106  | -0.01  | 0.048  | -0.004  | -0.05   | 0.171   | -0.001  | -0.03   | 0.049   | 0.072   | -0.069  | -0.092  | 0.025   | 0       | 0.733   | -0.028  | -0.075  | -0.114  | 0.013   | -0.001  | -0.04   | 0.062   | -0.011  | -0.001  | -0.016  | -0.011  |
| TIC wav HHL ngtdm Strength                | -0.166 | 0.277  | 0.28   | 0.035  | 0.044  | 0.075  | 0.516  | 0.07   | 0.331  | -0.167  | -0.044  | -0.057  | -0.021  | -0.016  | -0.011  | 0.036   | 0.043   | 0.121   | 0.044   | 0.076   | 0.152   | -0.065  | 0.098   | 0.106   | -0.015  | -0.051  | 0.012   | -0.027  | -0.005  | 0.017   | 0.015   | 0.049   |
| TIC wav HHL ngtdm Busyness                | 0.152  | -0.438 | -0.32  | -0.005 | 0.376  | 0.013  | -0.168 | 0.006  | 0.175  | 0.111   | -0.075  | -0.023  | -0.076  | -0.033  | 0.127   | -0.006  | -0.023  | 0.035   | -0.086  | 0.067   | 0.017   | 0.193   | 0.036   | -0.017  | 0.037   | 0.015   | -0.151  | -0.013  | -0.205  | 0.051   | 0.051   | -0.043  |
| TIC wav HHL glszm ZoneVariance            | 0.082  | -0.27  | -0.181 | 0.034  | 0.748  | 0.014  | -0.051 | 0.005  | 0.003  | 0.002   | 0.008   | -0.079  | -0.023  | -0.025  | 0.029   | -0.007  | -0.01   | -0.009  | -0.018  | 0       | 0.001   | 0.021   | 0.011   | -0.008  | 0.009   | 0       | -0.037  | -0.021  | 0.017   | -0.02   | 0.016   | -0.018  |
| TIC wav HHL glszm SmallAreaEmphasis       | 0.002  | 0.557  | 0.513  | 0.001  | 0.163  | 0.045  | 0.059  | 0.095  | 0.143  | -0.041  | 0.028   | 0.017   | 0.013   | -0.014  | -0.064  | -0.119  | 0.024   | -0.017  | -0.005  | 0.003   | 0.103   | -0.068  | 0.015   | 0.017   | -0.03   | -0.071  | 0.047   | -0.043  | -0.044  | -0.041  | -0.046  | 0.038   |
| TIC wav HHL glszm LAHGLE                  | 0.135  | -0.178 | -0.165 | 0.085  | 0.739  | 0.015  | 0.175  | 0.021  | 0.049  | -0.044  | 0.023   | -0.025  | 0.006   | -0.044  | -0.004  | -0.002  | -0.041  | -0.03   | 0.042   | -0.02   | -0.013  | -0.039  | 0.008   | -0.027  | -0.003  | 0.01    | 0.024   | -0.002  | 0.081   | -0.044  | 0.025   | -0.02   |
| TIC wav LLL glrlm LRHGLE                  | 0.192  | 0.589  | -0.21  | -0.069 | 0.009  | 0.009  | -0.089 | 0.198  | 0.106  | -0.013  | -0.08   | 0.091   | 0.082   | 0.078   | 0.107   | 0.019   | 0.044   | -0.092  | -0.013  | 0.002   | -0.06   | 0.111   | 0.095   | -0.049  | -0.148  | 0.11    | 0.238   | -0.001  | -0.023  | 0.001   | -0.027  | 0.022   |

| TIC feature name                          | TIC F1 | TIC F2 | TIC F3 | TIC F4 | TIC F5 | TIC F6 | TIC F7 | TIC F8 | TIC F9 | TIC F10 | TIC F11 | TIC F12 | TIC F13 | TIC F14 | TIC F15 | TIC F16 | TIC F17 | TIC F18 | TIC F19 | TIC F20 | TIC F21 | TIC F22 | TIC F23 | TIC F24 | TIC F25 | TIC F26 | TIC F27 | TIC F28 | TIC F29 | TIC F30 | TIC F31 | TIC F32 |
|-------------------------------------------|--------|--------|--------|--------|--------|--------|--------|--------|--------|---------|---------|---------|---------|---------|---------|---------|---------|---------|---------|---------|---------|---------|---------|---------|---------|---------|---------|---------|---------|---------|---------|---------|
| TIC wav LLL gldm SDLGLE                   | -0.809 | -0.126 | 0.062  | 0.009  | 0.043  | 0.061  | 0.002  | 0.044  | 0.011  | 0.014   | 0.004   | 0.003   | -0.028  | 0.05    | 0.003   | -0.015  | -0.033  | -0.013  | -0.007  | -0.018  | 0.011   | -0.038  | 0.019   | -0.006  | 0.038   | 0.044   | -0.017  | -0.01   | 0.012   | -0.029  | -0.041  | 0.028   |
| TIC wav LLL gldm LDLGLE                   | -0.643 | -0.246 | -0.014 | -0.026 | -0.02  | 0.036  | -0.03  | 0.003  | 0.095  | 0.179   | 0.167   | 0.032   | -0.049  | 0.033   | 0.011   | -0.047  | -0.104  | -0.047  | -0.074  | -0.058  | 0.055   | -0.097  | -0.078  | -0.165  | 0.04    | -0.106  | -0.071  | 0.011   | 0.082   | 0.016   | 0.002   | -0.007  |
| TIC wav LLL gldm DependenceVariance       | 0.277  | -0.542 | -0.263 | 0.138  | 0.376  | 0.105  | -0.002 | 0.027  | 0.023  | 0.138   | -0.035  | 0.04    | -0.019  | -0.101  | 0.114   | -0.014  | 0.034   | 0.111   | -0.051  | -0.002  | -0.023  | 0.049   | 0.025   | -0.073  | 0.027   | 0.047   | -0.058  | -0.026  | 0.008   | 0.032   | 0.061   | 0.02    |
| TIC wav LLL glcm Idm                      | 0.6    | -0.178 | -0.085 | 0.141  | 0.138  | 0.125  | 0.039  | 0.118  | 0.222  | 0.143   | 0.014   | -0.019  | 0.163   | -0.033  | 0.029   | 0.015   | 0.046   | -0.01   | 0.014   | -0.092  | -0.002  | 0.05    | 0.09    | -0.09   | 0.12    | 0.11    | 0.207   | 0.018   | -0.074  | 0.105   | 0.044   | 0.028   |
| TIC wav LLL glcm ClusterShade             | 0.095  | 0.119  | 0.064  | 0.132  | 0.009  | 0.097  | 0.105  | 0.109  | 0.025  | -0.004  | 0.167   | -0.009  | 0.004   | -0.034  | -0.07   | 0.014   | 0.075   | 0.038   | 0.046   | -0.036  | 0.036   | 0.019   | 0.122   | -0.048  | 0.707   | 0.028   | 0.003   | 0.036   | 0.003   | 0.008   | -0.018  | -0.02   |
| TIC wav LLL glcm Correlation              | 0.624  | -0.117 | -0.004 | 0.146  | 0.125  | 0.232  | 0.066  | 0.015  | 0.036  | 0.187   | 0.079   | -0.053  | -0.083  | 0.15    | 0.037   | 0.109   | -0.104  | -0.035  | 0.031   | -0.061  | -0.037  | -0.015  | 0.068   | 0.002   | 0.194   | 0.032   | 0.173   | -0.013  | -0.007  | -0.001  | 0.015   | 0       |
| TIC wav LLL glcm ClusterTendency          | 0.175  | 0.621  | -0.114 | -0.026 | 0.013  | 0.22   | -0.016 | 0.139  | 0.032  | 0.127   | 0.04    | 0.004   | -0.057  | 0.269   | 0.139   | 0.042   | -0.019  | -0.038  | 0.034   | -0.018  | 0.007   | -0.07   | 0.112   | 0.012   | -0.131  | 0.061   | 0.142   | 0.06    | -0.003  | -0.057  | 0.05    | -0.048  |
| TIC wav LLL glcm Idm                      | 0.205  | -0.692 | 0.022  | 0.141  | 0.207  | 0.122  | 0.026  | 0.014  | 0.046  | 0.209   | 0.002   | -0.019  | 0.043   | -0.1    | 0.048   | -0.016  | 0.013   | 0.028   | 0.017   | -0.082  | -0.046  | 0.007   | 0.003   | -0.064  | 0.008   | 0.089   | 0.025   | -0.002  | -0.022  | 0.032   | 0.035   | -0.046  |
| TIC wav LLL glcm DifferenceEntropy        | 0.332  | 0.694  | -0.145 | -0.149 | 0.101  | 0.075  | -0.03  | 0.091  | 0.039  | -0.131  | -0.008  | 0.02    | -0.048  | 0.105   | -0.006  | -0.002  | 0.008   | -0.04   | -0.015  | 0.028   | -0.001  | -0.015  | -0.014  | 0.026   | -0.01   | -0.018  | -0.002  | 0.008   | 0.032   | -0.018  | -0.038  | 0.008   |
| TIC wav LLL firstorder Maximum            | 0.1    | 0.594  | -0.051 | -0.124 | -0.07  | 0.005  | -0.014 | 0.226  | 0.104  | 0       | -0.009  | 0.389   | 0.095   | 0.128   | 0.101   | 0.055   | 0       | -0.023  | -0.025  | -0.007  | 0.06    | 0.009   | 0.081   | -0.015  | 0.115   | 0.069   | 0.141   | 0.038   | -0.038  | -0.004  | 0.014   | 0.037   |
| TIC wav LLL firstorder 10Percentile       | -0.216 | 0.268  | 0.092  | -0.188 | 0.114  | 0.147  | -0.052 | 0.067  | 0.136  | -0.048  | -0.034  | 0.662   | 0.029   | -0.024  | 0.097   | -0.034  | 0.022   | -0.033  | 0.044   | 0.012   | 0.055   | 0.103   | 0.01    | 0.014   | -0.05   | 0.018   | 0.029   | -0.019  | 0.001   | 0.002   | -0.025  | 0.031   |
| TIC wav LLL firstorder Skewness           | 0.325  | 0.047  | 0.098  | 0.072  | 0.095  | 0.093  | 0.287  | 0.014  | 0.104  | 0.078   | 0.068   | -0.083  | 0.07    | 0.083   | -0.046  | 0.061   | -0.097  | -0.012  | -0.094  | 0.073   | 0.027   | -0.16   | 0.067   | 0.021   | 0.549   | -0.014  | -0.066  | 0.052   | -0.078  | -0.034  | -0.092  | 0.118   |
| TIC wav LLL firstorder Range              | 0.307  | 0.598  | -0.164 | -0.021 | 0.009  | 0.067  | -0.021 | 0.251  | 0.103  | -0.016  | -0.026  | 0.045   | 0.124   | 0.108   | 0.071   | 0.07    | 0.035   | -0.039  | -0.048  | -0.016  | 0       | 0.015   | 0.105   | -0.055  | 0.099   | 0.089   | 0.209   | 0.04    | -0.05   | 0.02    | 0.006   | 0.042   |
| TIC wav LLL firstorder InterquartileRange | 0.151  | 0.662  | -0.182 | -0.062 | 0.053  | 0.063  | -0.108 | 0.121  | 0.094  | 0.067   | -0.026  | 0.005   | -0.068  | 0.286   | 0.056   | 0.086   | -0.074  | -0.043  | -0.036  | -0.029  | -0.02   | -0.046  | 0.014   | 0.047   | -0.037  | -0.005  | 0.132   | 0.032   | 0.013   | -0.062  | 0.054   | -0.044  |
| TIC wav LLL firstorder 90Percentile       | -0.072 | 0.58   | -0.014 | -0.178 | 0.097  | 0.052  | -0.066 | 0.109  | 0.049  | -0.022  | -0.036  | 0.496   | -0.021  | 0.118   | 0.109   | 0.014   | -0.015  | -0.029  | 0.034   | -0.001  | 0.033   | 0.045   | 0.026   | 0.037   | -0.046  | 0.02    | 0.091   | -0.006  | 0.007   | -0.039  | -0.005  | 0.003   |
| TIC wav LLL firstorder Minimum            | -0.358 | 0.018  | 0.196  | -0.186 | 0.142  | 0.109  | 0.011  | 0.035  | 0.006  | 0.027   | 0.027   | 0.612   | -0.046  | 0.04    | 0.06    | -0.026  | -0.061  | 0.026   | 0.037   | 0.016   | 0.106   | -0.01   | -0.038  | 0.069   | 0.03    | -0.032  | -0.112  | -0.001  | 0.02    | -0.044  | 0.013   | -0.008  |
| TIC wav LLL firstorder TotalEnergy        | 0.35   | 0.222  | -0.275 | 0.018  | 0.021  | 0.048  | -0.04  | 0.114  | 0.513  | 0.018   | -0.06   | 0.31    | 0.028   | 0.009   | 0.103   | 0.03    | -0.013  | -0.019  | 0.038   | 0.054   | 0.015   | 0.045   | 0.083   | -0.016  | -0.092  | 0.028   | 0.023   | 0.005   | -0.054  | -0.05   | 0.009   | 0.058   |
| TIC wav LLL ngtdm Complexity              | 0.171  | 0.645  | -0.183 | -0.061 | 0.006  | 0.078  | 0.002  | 0.311  | 0.093  | 0.042   | -0.034  | 0.076   | 0.04    | 0.165   | 0.132   | 0.024   | -0.005  | -0.065  | -0.043  | 0.006   | -0.02   | 0.01    | 0.11    | -0.01   | -0.027  | 0.086   | 0.097   | 0.04    | -0.007  | -0.023  | -0.003  | -0.004  |
| TIC wav LLL ngtdm Strength                | -0.208 | 0.463  | 0.048  | -0.057 | 0.046  | 0.199  | -0.021 | 0.043  | 0.363  | -0.076  | 0.01    | -0.124  | -0.052  | 0.128   | 0.056   | 0.245   | -0.023  | -0.014  | -0.023  | 0.027   | 0.04    | -0.038  | 0.151   | -0.03   | 0.176   | 0.009   | 0.245   | 0.04    | -0.013  | -0.063  | 0.112   | 0.021   |
| TIC wav LLL ngtdm Busyness                | 0.185  | -0.471 | -0.148 | 0.064  | 0.07   | -0.13  | 0.058  | 0.064  | 0.332  | 0.131   | -0.033  | -0.073  | -0.03   | -0.046  | 0.034   | -0.129  | -0.008  | 0.014   | -0.031  | 0.068   | 0.068   | 0.009   | -0.04   | 0.05    | 0.059   | -0.022  | -0.387  | -0.008  | -0.08   | -0.047  | -0.02   | 0.014   |
| TIC wav LLL ngtdm Contrast                | -0.587 | 0.426  | -0.001 | -0.073 | 0.065  | 0.063  | -0.057 | 0.034  | 0.289  | -0.128  | -0.075  | -0.004  | -0.04   | 0.067   | 0.061   | 0.124   | -0.038  | 0.068   | -0.017  | 0.015   | -0.032  | -0.052  | -0.035  | 0.008   | 0.001   | -0.058  | -0.017  | 0.008   | -0.002  | -0.049  | 0.033   | -0.041  |
| TIC wav LLL glszm GLNUN                   | -0.573 | -0.521 | 0.14   | 0.066  | 0.029  | 0.031  | 0.046  | 0.063  | 0.046  | 0.059   | -0.008  | 0.041   | 0.03    | -0.142  | 0.062   | -0.082  | 0.072   | 0.005   | 0.022   | -0.037  | 0.004   | -0.008  | 0.015   | -0.03   | -0.008  | 0.036   | -0.101  | 0.006   | -0.048  | 0.032   | -0.009  | 0.014   |
| TIC wav LLL glszm GLNU                    | 0.404  | -0.193 | -0.212 | 0.161  | 0.192  | 0.054  | 0.053  | 0.024  | 0.564  | -0.03   | -0.054  | 0.025   | 0.001   | -0.126  | 0.046   | -0.025  | 0.017   | 0.043   | -0.016  | 0.018   | 0.019   | 0.03    | -0.001  | -0.018  | -0.018  | -0.013  | -0.133  | 0.006   | -0.032  | -0.022  | -0.006  | -0.001  |
| TIC lbp 2D firstorder Kurtosis            | -0.43  | 0.056  | 0.002  | -0.635 | 0.017  | 0.153  | -0.091 | 0.044  | 0.013  | 0.026   | -0.028  | 0.067   | 0.065   | -0.03   | 0.091   | 0.037   | 0.034   | 0.056   | -0.088  | -0.119  | -0.086  | 0.054   | -0.02   | -0.005  | 0.028   | 0.054   | 0.029   | -0.06   | 0.022   | -0.056  | -0.012  | -0.034  |
| TIC lbp 2D firstorder RMAD                | 0.19   | 0.051  | 0.497  | 0.533  | 0.118  | 0.022  | 0.113  | 0.011  | 0.024  | -0.078  | 0.014   | 0.084   | -0.159  | -0.009  | 0.029   | -0.121  | 0.024   | 0.005   | 0.098   | 0.099   | 0.103   | -0.034  | 0.059   | 0.018   | -0.023  | -0.051  | -0.028  | 0.045   | -0.035  | 0.014   | 0.009   | -0.026  |
| TIC lbp 2D firstorder Uniformity          | -0.212 | 0.05   | 0.737  | -0.107 | 0.076  | 0.123  | 0.009  | 0.043  | 0.051  | 0.009   | -0.003  | 0.042   | 0.01    | -0.081  | -0.013  | -0.118  | 0.045   | 0.073   | 0.103   | -0.012  | 0.073   | 0.081   | 0.069   | 0.06    | -0.055  | 0.038   | -0.036  | 0.028   | 0.015   | -0.042  | 0.033   | -0.02   |
| TIC lbp 2D glcm ClusterShade              | -0.286 | 0.271  | 0.293  | -0.439 | 0.131  | 0.242  | -0.054 | 0.014  | 0.005  | -0.067  | -0.061  | 0.141   | -0.11   | -0.101  | 0.167   | -0.01   | 0.117   | 0.098   | -0.005  | -0.07   | 0.006   | -0.106  | -0.046  | -0.046  | 0.005   | 0.14    | -0.019  | -0.035  | -0.049  | 0.048   | 0.01    | 0.146   |
| TIC lbp 2D glcm ClusterTendency           | 0.15   | 0.058  | 0.405  | 0.499  | 0.096  | 0.044  | 0.163  | 0.007  | 0.02   | -0.053  | 0.043   | 0.023   | -0.276  | -0.117  | -0.017  | -0.106  | 0.029   | 0.024   | 0.075   | 0.14    | 0.126   | -0.171  | 0.042   | 0.034   | -0.058  | 0.06    | 0.01    | 0.03    | -0.083  | 0.027   | 0.077   | -0.061  |
| TIC lbp 2D glcm Correlation               | 0.262  | 0.017  | -0.41  | -0.028 | 0.046  | 0.123  | 0.074  | 0.04   | 0.013  | 0.085   | 0.101   | -0.039  | -0.393  | -0.125  | -0.108  | 0.043   | 0.026   | -0.177  | -0.115  | 0.115   | -0.02   | -0.209  | -0.061  | 0.105   | 0.05    | 0.176   | 0.059   | 0.048   | -0.2    | 0.034   | 0.034   | -0.057  |
| TIC lbp 2D glcm DifferenceEntropy         | 0.709  | 0.075  | -0.079 | 0.296  | 0.023  | 0.087  | 0.07   | 0.082  | 0.046  | -0.114  | 0.013   | -0.006  | -0.072  | -0.001  | 0.066   | -0.041  | 0.018   | -0.01   | 0.041   | 0.044   | 0.028   | -0.109  | -0.007  | -0.03   | 0.016   | -0.059  | 0.019   | -0.066  | 0.1     | 0.059   | 0.04    | -0.011  |
| TIC lbp 2D glcm DifferenceVariance        | -0.065 | 0.048  | 0.721  | 0.142  | 0.062  | 0.108  | 0.062  | 0.081  | 0.021  | -0.048  | -0.019  | 0.113   | 0       | -0.058  | 0.05    | -0.163  | -0.008  | 0.164   | 0.089   | 0.063   | 0.125   | -0.022  | 0.103   | 0.033   | -0.042  | 0.004   | 0.013   | -0.013  | 0.014   | -0.021  | 0.018   | -0.015  |

| TIC feature name                                  | TIC F1 | TIC F2 | TIC F3 | TIC F4 | TIC F5 | TIC F6 | TIC F7   | TIC F8 | TIC F9 | TIC F10 | TIC F11 | TIC F12 | TIC F13 | TIC F14 | TIC F15 | TIC F16 | TIC F17 | TIC F18 | TIC F19 | TIC F20 | TIC F21 | TIC F22 | TIC F23 | TIC F24 | TIC F25 | TIC F26 | TIC F27 | TIC F28 | TIC F29 | TIC F30 | TIC F31  | TIC F32 |
|---------------------------------------------------|--------|--------|--------|--------|--------|--------|----------|--------|--------|---------|---------|---------|---------|---------|---------|---------|---------|---------|---------|---------|---------|---------|---------|---------|---------|---------|---------|---------|---------|---------|----------|---------|
| TIC lbp 2D glcm ldm                               | 0.014  | -0.082 | 0.081  | -0.711 | 0.047  | 0.013  | -0.068   | 0.092  | 0.052  | 0.141   | 0.067   | 0.053   | 0.05    | -0.041  | -0.051  | -0.069  | -0.033  | -0.027  | -0.106  | 0.03    | -0.038  | -0.034  | 0.078   | 0.117   | 0.089   | 0.207   | 0.095   | 0.005   | -0.018  | -0.075  | -0.021   | 0.011   |
| TIC lbp 2D glcm ldn                               | -0.011 | -0.057 | -0.401 | -0.637 | 0.023  | 0.073  | -0.096   | 0.034  | 0.039  | 0.115   | 0.034   | 0.001   | 0.013   | 0.004   | -0.029  | 0.069   | -0.028  | -0.096  | -0.15   | -0.027  | -0.103  | -0.027  | -0.024  | 0.07    | 0.095   | 0.134   | 0.062   | 0.013   | -0.053  | -0.034  | -0.044   | 0.025   |
| TIC lbp 2D glcm InverseVariance                   | -0.047 | -0.025 | -0.056 | -0.544 | 0.092  | 0.152  | -0.102   | 0.157  | -0.05  | 0.092   | -0.133  | 0.061   | -0.02   | -0.006  | 0.088   | 0.114   | -0.191  | -0.097  | -0.209  | 0.008   | -0.11   | -0.022  | -0.003  | 0.121   | 0.123   | -0.045  | 0.101   | 0.087   | -0.227  | -0.104  | -0.108   | -0.004  |
| TIC lbp 2D glcm MaximumProbability                | -0.414 | 0.025  | 0.664  | 0.035  | 0.086  | 0.069  | 0.049    | -0.09  | 0.022  | -0.032  | 0.021   | 0.009   | 0.042   | -0.052  | -0.072  | -0.101  | 0.055   | 0.039   | 0.095   | -0.025  | 0.068   | 0.012   | 0.04    | 0.038   | -0.016  | 0.028   | -0.008  | 0.036   | 0.039   | -0.022  | 0.072    | 0.014   |
| TIC lbp 2D glcm SumEntropy                        | 0.711  | 0.063  | -0.265 | 0.213  | 0.009  | 0.033  | 0.066    | 0.071  | 0.012  | -0.035  | 0.029   | -0.036  | -0.173  | -0.016  | 0.013   | 0.017   | 0.032   | -0.052  | 0.023   | 0.073   | -0.048  | -0.08   | -0.037  | 0.006   | 0       | 0.005   | 0.024   | -0.014  | 0.013   | 0.068   | 0.02     | -0.048  |
| TIC lbp 2D glrlm LRLGLE                           | -0.071 | 0.156  | 0.717  | -0.046 | 0.145  | 0.183  | 0.002    | 0.032  | 0.027  | -0.107  | 0.038   | 0.085   | -0.13   | -0.033  | 0.05    | -0.056  | 0.137   | 0.07    | 0.054   | -0.035  | 0.026   | 0.024   | 0.004   | 0.046   | 0.037   | 0.09    | 0.018   | -0.043  | 0.035   | 0.006   | -0.006   | -0.088  |
| TIC lbp 2D glrlm RanLengthNonUniformityNormalized | -0.14  | 0.091  | 0.662  | 0.225  | 0.049  | 0.153  | -0.002   | 0.031  | -0.08  | -0.03   | -0.067  | -0.095  | 0.007   | 0.042   | -0.016  | 0.148   | -0.03   | -0.037  | -0.053  | -0.06   | -0.028  | -0.053  | -0.037  | -0.029  | 0.002   | -0.287  | -0.01   | 0.02    | -0.083  | -0.035  | 0.031    | -0.008  |
| TIC lbp 2D glrlm RunVariance                      | 0.349  | -0.09  | -0.523 | -0.152 | 0.004  | 0.042  | -0.015   | 0.005  | 0.198  | 0.067   | 0.123   | 0.073   | 0.018   | -0.046  | 0.015   | -0.184  | 0.069   | 0.021   | 0.073   | 0.024   | 0.023   | 0.064   | 0.027   | 0.066   | 0.097   | 0.332   | -0.033  | -0.014  | 0.074   | 0.008   | 0.036    | -0.049  |
| TIC lbp 2D glrlm SRHGLE                           | 0.396  | -0.193 | -0.307 | 0.478  | 0.169  | 0.209  | 0.081    | 0.006  | 0.003  | 0.109   | 0.005   | -0.118  | 0.076   | 0.041   | -0.19   | -0.007  | -0.034  | 0.001   | 0.055   | 0.037   | 0.069   | -0.009  | 0.025   | 0.035   | -0.022  | -0.121  | -0.011  | 0.047   | 0.031   | 0.032   | 0.008    | 0.009   |
| TIC lbp 2D glszm GrayLevelVariance                | 0.353  | -0.032 | 0.576  | 0.387  | 0.043  | 0.083  | 0.03     | 0.018  | 0.041  | -0.039  | 0.014   | 0.033   | 0.015   | 0.035   | -0.022  | -0.083  | 0.026   | -0.008  | 0.133   | 0.105   | 0.052   | 0.024   | 0.09    | 0.034   | 0.005   | -0.112  | -0.055  | 0.017   | 0.083   | -0.017  | -0.029   | -0.044  |
| TIC lbp 2D glszm LALGLE                           | 0.118  | 0.19   | 0.507  | -0.12  | 0.153  | 0.261  | 0.003    | 0.052  | 0.013  | -0.116  | 0.077   | 0.149   | -0.203  | -0.015  | 0.056   | -0.097  | 0.171   | 0.104   | 0.055   | -0.048  | 0.107   | 0.052   | -0.038  | 0.093   | 0.093   | 0.21    | 0.036   | -0.055  | 0.096   | 0.051   | 0.005    | -0.155  |
| TIC lbp 2D glszm SZNUN                            | -0.314 | 0.042  | 0.568  | 0.193  | 0.027  | 0.175  | -0.003   | 0.043  | 0.051  | -0.048  | -0.082  | -0.107  | 0.072   | 0.079   | 0.018   | 0.196   | -0.08   | -0.047  | -0.04   | -0.029  | -0.073  | -0.064  | 0.002   | -0.101  | 0.028   | -0.218  | -0.025  | 0.085   | -0.107  | -0.062  | -0.033   | -0.015  |
| TIC lbp 2D glszm SALGLE                           | -0.321 | 0.016  | 0.711  | 0.003  | 0.111  | 0.053  | -0.002   | 0.014  | 0.013  | -0.044  | 0.007   | 0.066   | 0.007   | -0.075  | 0.097   | -0.09   | -0.032  | -0.012  | 0.055   | -0.011  | -0.018  | -0.014  | 0.102   | 0.009   | 0.015   | 0.022   | -0.026  | 0.002   | -0.029  | -0.061  | -0.043   | -0.012  |
| TIC lbp 2D glszm ZoneVariance                     | 0.284  | -0.086 | -0.559 | -0.102 | 0      | 0.007  | 0.01     | 0.075  | 0.188  | 0.035   | 0.082   | 0.046   | 0.022   | 0.004   | 0.064   | -0.138  | -0.057  | 0.023   | 0.128   | 0.097   | 0.064   | 0.056   | 0.059   | -0.028  | 0.095   | 0.372   | -0.024  | 0.06    | 0.045   | 0.001   | -0.026   | -0.082  |
| TIC lbp 2D glldm DependenceVariance               | 0.133  | -0.125 | -0.585 | -0.235 | 0.039  | 0.094  | 0.003    | 0.085  | 0.156  | 0.045   | 0.102   | 0.051   | 0.086   | 0.014   | 0.035   | -0.069  | 0.015   | 0.035   | 0.06    | 0.043   | -0.074  | 0.034   | 0.1     | -0.065  | 0.076   | 0.367   | -0.029  | 0.084   | 0.077   | 0.01    | -0.04    | -0.022  |
| TIC lbp 2D glldm LDHGLE                           | 0.198  | -0.193 | -0.524 | 0.338  | 0.103  | 0.002  | 0.152    | 0.028  | 0.135  | 0.094   | 0.102   | -0.028  | 0.003   | -0.091  | -0.057  | -0.196  | -0.078  | 0.021   | 0.084   | 0.059   | 0.113   | -0.07   | 0.11    | 0.017   | -0.055  | 0.213   | 0.024   | 0.041   | -0.018  | 0.006   | 0.024    | 0.029   |
| TIC lbp 2D glldm SDHGLE                           | 0.41   | -0.115 | 0.024  | 0.403  | 0.13   | 0.29   | 0.006    | 0.005  | 0.083  | 0.061   | -0.061  | -0.169  | 0.1     | 0.137   | -0.206  | 0.144   | 0.003   | -0.041  | -0.006  | 0.02    | -0.023  | 0.02    | -0.014  | -0.007  | 0.016   | -0.305  | -0.019  | 0.043   | 0.031   | -0.01   | 0.00E+00 | -0.008  |
| TIC lbp 2D ngtdm Complexity                       | 0.222  | 0.098  | 0.642  | 0.295  | 0.084  | 0.037  | 0.035    | 0.001  | 0.072  | -0.061  | 0       | 0.032   | -0.025  | -0.035  | -0.04   | -0.138  | 0.069   | 0.024   | 0.156   | 0.126   | -0.035  | 0.032   | 0.086   | 0.027   | -0.089  | -0.089  | -0.096  | 0.019   | 0.087   | -0.057  | 0.02     | 0.029   |
| TIC lbp 2D ngtdm Contrast                         | -0.243 | 0.027  | 0.557  | 0.391  | 0.024  | 0.048  | 0.11     | 0.038  | 0.069  | -0.02   | 0.014   | 0.094   | 0.043   | -0.036  | 0.036   | -0.132  | -0.013  | 0.114   | 0.087   | -0.063  | 0.276   | 0.033   | 0.034   | 0.055   | -0.027  | -0.038  | -0.025  | 0.044   | -0.03   | 0.043   | -0.036   | -0.044  |
| TIC lbp 3D m1 firstorder 90Percentile             | 0.417  | -0.216 | -0.395 | 0.375  | 0.152  | 0.226  | 0.015    | 0.063  | 0.034  | 0.09    | 0.004   | -0.136  | -0.012  | 0.087   | -0.133  | 0.057   | -0.098  | -0.03   | -0.055  | -0.051  | -0.051  | -0.078  | -0.027  | -0.003  | 0.043   | -0.039  | 0.038   | 0.059   | -0.042  | -0.008  | 0.065    | -0.005  |
| TIC lbp 3D m1 firstorder InterquartileRange       | 0.533  | -0.089 | 0.316  | 0.35   | 0.034  | 0.221  | 0.067    | 0.021  | 0.026  | -0.024  | 0.092   | -0.046  | 0.023   | 0.075   | -0.031  | 0.015   | 0.184   | -0.093  | -0.062  | -0.121  | 0.042   | 0.012   | -0.022  | -0.016  | 0.06    | 0.014   | 0.075   | -0.013  | 0.025   | -0.001  | 0.03     | 0.061   |
| TIC lbp 3D m1 firstorder Kurtosis                 | -0.035 | 0.157  | -0.032 | -0.147 | 0.111  | 0.168  | -0.055   | 0.048  | 0.013  | 0.054   | -0.065  | 0.027   | -0.032  | -0.048  | 0.046   | -0.038  | -0.165  | 0.029   | 0.085   | 0.701   | -0.127  | -0.12   | -0.006  | 0.054   | -0.003  | 0.042   | -0.032  | -0.034  | -0.04   | -0.007  | 0.006    | -0.063  |
| TIC lbp 3D m1 firstorder Median                   | 0.223  | -0.18  | -0.695 | 0.048  | 0.145  | 0.175  | 0.00E+00 | 0.005  | 0.034  | 0.047   | -0.013  | -0.109  | 0.049   | 0.05    | -0.129  | 0.075   | -0.036  | -0.032  | -0.067  | -0.078  | 0.033   | -0.045  | 0.031   | -0.029  | 0.007   | -0.07   | 0.055   | -0.011  | 0.048   | -0.018  | -0.019   | 0.028   |
| TIC lbp 3D m1 firstorder RMAD                     | 0.405  | -0.183 | 0.312  | 0.424  | 0.066  | 0.251  | 0.077    | 0.036  | 0.036  | 0.019   | 0.106   | -0.123  | -0.044  | 0.079   | -0.101  | 0.043   | 0.119   | -0.11   | -0.073  | -0.194  | -0.022  | -0.012  | -0.027  | -0.032  | 0.004   | 0.065   | 0.062   | -0.006  | 0.067   | -0.011  | 0.005    | 0.059   |
| TIC lbp 3D m1 firstorder Skewness                 | 0.143  | 0.168  | 0.628  | 0.159  | 0.129  | 0.076  | 0.009    | 0.043  | 0.002  | 0.04    | -0.024  | 0.085   | -0.154  | -0.026  | 0.059   | -0.015  | -0.064  | 0.038   | 0.024   | 0.331   | -0.059  | -0.062  | -0.039  | 0.047   | 0.07    | 0.025   | -0.013  | 0.084   | -0.072  | -0.013  | 0.084    | -0.025  |
| TIC lbp 3D m1 firstorder Uniformity               | -0.629 | 0.059  | 0.288  | -0.306 | 0.075  | 0.163  | -0.064   | 0.009  | 0.007  | 0.012   | -0.029  | 0.041   | 0.06    | -0.077  | 0.038   | -0.09   | 0.082   | 0.037   | 0.13    | 0.055   | -0.008  | 0.149   | 0.01    | 0.007   | -0.063  | 0.025   | -0.033  | -0.028  | -0.016  | 0.013   | -0.001   | -0.069  |
| TIC lbp 3D m1 glcm Autocorrelation                | 0.286  | -0.249 | -0.585 | 0.186  | 0.172  | 0.186  | -0.02    | 0.031  | 0.01   | 0.126   | -0.02   | -0.124  | 0.084   | 0.046   | -0.183  | 0.038   | -0.116  | -0.06   | -0.061  | 0.008   | 0.002   | -0.072  | -0.004  | 0.007   | 0.023   | -0.017  | 0.042   | 0.049   | -0.051  | -0.021  | -0.01    | 0.003   |
| TIC lbp 3D m1 glcm ClusterShade                   | 0.189  | 0.018  | 0.519  | 0.35   | -0.15  | 0.166  | -0.037   | 0.104  | 0.096  | 0.018   | -0.034  | 0.05    | -0.079  | 0.004   | 0.06    | 0.026   | -0.097  | -0.095  | -0.046  | 0.276   | -0.005  | -0.045  | -0.074  | 0.007   | 0.008   | 0.009   | 0.029   | 0.014   | -0.135  | -0.119  | 0.099    | -0.007  |
| TIC lbp 3D m1 glcm DifferenceEntropy              | 0.713  | -0.079 | -0.016 | 0.361  | 0.061  | 0.079  | 0.038    | 0.019  | 0.078  | 0.062   | 0.008   | -0.09   | 0.001   | 0.009   | -0.033  | -0.003  | 0.009   | -0.031  | -0.032  | -0.025  | -0.052  | -0.029  | -0.041  | -0.003  | 0.044   | 0.04    | 0.043   | 0.01    | 0.044   | 0.018   | 0.04     | 0.06    |

| TIC feature name                            | TIC F1 | TIC F2 | TIC F3 | TIC F4 | TIC F5 | TIC F6 | TIC F7 | TIC F8 | TIC F9 | TIC F10 | TIC F11 | TIC F12 | TIC F13 | TIC F14 | TIC F15 | TIC F16 | TIC F17 | TIC F18 | TIC F19 | TIC F20 | TIC F21 | TIC F22 | TIC F23 | TIC F24 | TIC F25 | TIC F26 | TIC F27 | TIC F28 | TIC F29 | TIC F30 | TIC F31 | TIC F32 |
|---------------------------------------------|--------|--------|--------|--------|--------|--------|--------|--------|--------|---------|---------|---------|---------|---------|---------|---------|---------|---------|---------|---------|---------|---------|---------|---------|---------|---------|---------|---------|---------|---------|---------|---------|
| TIC lbp 3D m1 glcm DifferenceVariance       | 0.478  | -0.22  | 0.142  | 0.502  | 0.043  | 0.202  | 0.036  | 0.085  | 0.097  | 0.02    | 0.017   | -0.109  | 0.007   | 0.048   | -0.068  | 0.041   | 0.001   | -0.061  | -0.09   | 0.052   | -0.032  | -0.078  | -0.028  | -0.043  | 0.093   | 0.042   | 0.099   | -0.007  | 0.022   | -0.054  | 0.072   | 0.089   |
| TIC lbp 3D m1 glcm Idm                      | -0.363 | 0.084  | -0.018 | -0.619 | 0.114  | 0.121  | -0.033 | 0.014  | 0.038  | -0.119  | 0.049   | 0.028   | -0.051  | -0.013  | 0.052   | -0.08   | 0.2     | -0.069  | 0.118   | 0.085   | 0.043   | 0.038   | -0.006  | 0.019   | -0.044  | -0.002  | -0.032  | -0.178  | 0.019   | 0.045   | -0.008  | -0.044  |
| TIC lbp 3D m1 glcm Idn                      | 0.244  | 0.189  | -0.196 | -0.574 | 0.123  | 0.111  | -0.055 | 0.008  | 0.132  | -0.081  | 0.056   | 0.029   | -0.118  | -0.018  | 0.001   | -0.056  | 0.053   | -0.086  | 0.111   | 0.297   | -0.094  | -0.02   | 0.021   | -0.005  | -0.069  | -0.034  | -0.077  | -0.11   | 0.026   | 0.026   | -0.043  | -0.057  |
| TIC lbp 3D m1 glcm InverseVariance          | -0.358 | 0.146  | -0.115 | -0.621 | 0.095  | 0.162  | 0.038  | 0.002  | 0.002  | -0.077  | 0.014   | 0.135   | -0.101  | 0.01    | 0.064   | 0.003   | 0.029   | 0.018   | 0.023   | 0.07    | 0.164   | 0.004   | 0.026   | 0.017   | -0.002  | 0.023   | -0.033  | -0.062  | 0.013   | 0.099   | -0.054  | -0.06   |
| TIC lbp 3D m1 glcm MaximumProbability       | -0.718 | -0.057 | 0.287  | -0.161 | 0.069  | 0.021  | -0.056 | 0.047  | -0.09  | -0.029  | -0.013  | -0.065  | 0.058   | -0.008  | -0.012  | -0.014  | 0.105   | 0.045   | 0.099   | 0.039   | -0.029  | 0.069   | 0.016   | -0.002  | -0.023  | -0.069  | 0.034   | -0.037  | -0.006  | -0.031  | 0.045   | -0.032  |
| TIC lbp 3D m1 glcm SumEntropy               | 0.764  | -0.028 | -0.128 | 0.227  | 0.056  | 0.083  | 0.029  | 0.004  | 0.076  | 0.044   | 0.007   | -0.06   | -0.059  | 0.01    | -0.032  | 0.001   | 0.012   | -0.065  | -0.027  | -0.005  | -0.023  | -0.043  | -0.037  | 0.042   | 0.023   | 0.043   | 0.026   | 0.017   | 0.004   | 0.047   | 0.041   | 0.018   |
| TIC lbp 3D m1 glrlm ShortRunEmphasis        | -0.016 | 0.048  | 0.658  | 0.194  | 0.085  | 0.104  | 0.094  | 0.051  | 0.021  | 0.17    | 0.036   | -0.028  | 0.046   | 0.02    | -0.099  | 0.136   | -0.164  | 0.079   | -0.176  | -0.107  | 0.006   | -0.127  | 0.045   | -0.019  | 0.058   | -0.047  | 0.042   | 0.161   | 0.023   | -0.013  | 0       | 0.03    |
| TIC lbp 3D m1 glszm GrayLevelVariance       | 0.521  | -0.171 | -0.133 | 0.448  | 0.103  | 0.279  | 0.02   | 0.061  | 0.048  | 0.035   | 0.019   | -0.134  | -0.012  | 0.093   | -0.079  | 0.076   | -0.032  | -0.056  | -0.028  | 0.057   | -0.043  | -0.088  | -0.039  | -0.054  | 0.1     | -0.011  | 0.049   | 0.064   | -0.022  | -0.011  | 0.035   | 0.048   |
| TIC lbp 3D m1 glszm HGLZE                   | 0.418  | -0.205 | -0.486 | 0.222  | 0.187  | 0.219  | 0.005  | 0.048  | 0.016  | 0.129   | -0.009  | -0.118  | 0.058   | 0.071   | -0.181  | 0.065   | -0.015  | -0.003  | -0.056  | -0.051  | -0.023  | -0.06   | -0.035  | -0.005  | 0.02    | -0.054  | 0.044   | 0.093   | 0       | -0.039  | 0.012   | 0.08    |
| TIC lbp 3D m1 glszm LALGLE                  | 0.086  | 0.013  | 0.554  | -0.102 | 0.051  | 0.063  | -0.058 | 0.026  | 0.127  | -0.077  | 0.004   | -0.064  | 0.031   | 0.02    | -0.03   | -0.078  | 0.432   | 0.064   | 0.176   | -0.044  | -0.039  | 0.096   | -0.176  | 0.08    | 0.012   | 0.006   | 0.065   | -0.133  | 0.077   | 0.009   | 0.014   | -0.04   |
| TIC lbp 3D m1 glszm LGLZE                   | -0.315 | 0.076  | 0.704  | 0.061  | 0.087  | -0.04  | -0.022 | 0.002  | 0.031  | -0.031  | 0.043   | 0.021   | -0.017  | -0.024  | 0.061   | -0.087  | 0.027   | -0.017  | 0.082   | 0.015   | -0.002  | 0.112   | 0.006   | 0.016   | 0.07    | 0.101   | -0.055  | -0.105  | -0.017  | 0.129   | -0.01   | -0.029  |
| TIC lbp 3D m1 glszm SmallAreaEmphasis       | -0.016 | 0.017  | 0.622  | 0.162  | 0.063  | 0.198  | 0.119  | 0.031  | 0.023  | 0.175   | 0.116   | -0.035  | 0.042   | 0.091   | -0.158  | 0.092   | -0.122  | -0.035  | -0.116  | -0.113  | -0.033  | -0.122  | 0.053   | -0.037  | 0.095   | -0.037  | 0.003   | 0.14    | -0.119  | 0.021   | -0.05   | 0.055   |
| TIC lbp 3D m1 glszm SAHGLE                  | 0.48   | -0.157 | -0.309 | 0.243  | 0.157  | 0.266  | 0.035  | 0.043  | 0.003  | 0.187   | 0.008   | -0.121  | 0.035   | 0.081   | -0.218  | 0.076   | 0.003   | 0.005   | -0.075  | -0.071  | -0.029  | -0.103  | -0.026  | -0.035  | 0.044   | -0.07   | 0.043   | 0.159   | 0.002   | -0.058  | -0.017  | 0.099   |
| TIC lbp 3D m1 glszm SALGLE                  | -0.424 | 0.04   | 0.573  | 0.162  | 0.092  | 0.023  | -0.026 | 0.008  | 0.122  | 0.032   | 0.043   | 0.045   | 0.023   | 0.008   | 0.081   | -0.064  | -0.166  | -0.08   | 0.02    | 0.026   | -0.024  | 0.104   | -0.032  | -0.006  | 0.138   | 0.074   | -0.069  | -0.055  | -0.068  | 0.159   | 0.042   | -0.005  |
| TIC lbp 3D m1 glszm ZoneVariance            | 0.165  | -0.096 | -0.612 | -0.156 | 0.119  | 0.059  | -0.106 | 0.086  | 0.021  | -0.149  | -0.08   | -0.005  | 0.064   | 0.059   | 0.043   | -0.055  | -0.019  | -0.109  | 0.203   | 0.205   | -0.061  | 0.149   | -0.074  | 0.057   | -0.033  | 0.005   | -0.005  | -0.087  | -0.014  | 0.079   | 0.034   | -0.075  |
| TIC lbp 3D m1 gldm DependenceVariance       | 0.118  | -0.1   | -0.558 | -0.22  | 0.071  | 0.008  | -0.049 | 0.063  | 0.097  | -0.123  | 0.057   | 0.005   | -0.016  | 0.095   | 0.035   | -0.137  | 0.248   | -0.152  | 0.18    | 0.062   | -0.012  | 0.089   | -0.053  | 0.032   | 0.004   | 0.068   | -0.092  | -0.185  | -0.1    | 0.004   | -0.059  | -0.008  |
| TIC lbp 3D m1 gldm SDHGLE                   | 0.422  | -0.161 | -0.14  | 0.319  | 0.101  | 0.297  | 0.069  | 0.022  | 0.011  | 0.233   | 0.024   | -0.15   | 0.056   | 0.088   | -0.25   | 0.101   | -0.06   | 0.009   | -0.12   | -0.096  | -0.031  | -0.143  | -0.008  | -0.029  | 0.052   | -0.091  | 0.069   | 0.162   | -0.005  | -0.054  | -0.017  | 0.085   |
| TIC lbp 3D m1 gldm SDLGLE                   | -0.32  | 0.028  | 0.715  | 0.139  | 0.077  | 0.041  | -0.007 | 0.01   | 0.076  | 0.046   | 0.056   | 0.025   | 0.032   | 0.012   | 0.024   | -0.035  | -0.095  | -0.029  | 0       | -0.004  | -0.003  | 0.071   | -0.007  | 0       | 0.094   | 0.059   | -0.044  | -0.032  | -0.059  | 0.088   | 0.005   | -0.009  |
| TIC lbp 3D m1 ngtdm Busyness                | 0.415  | -0.011 | 0.05   | 0.234  | 0.15   | 0.063  | 0.043  | 0.031  | 0.637  | -0.014  | -0.045  | -0.019  | 0.008   | -0.034  | 0.043   | -0.022  | 0.052   | 0.052   | -0.004  | -0.031  | -0.008  | -0.025  | -0.072  | -0.009  | 0.016   | 0.003   | 0.007   | -0.018  | 0.01    | 0.004   | 0.058   | -0.009  |
| TIC lbp 3D m1 ngtdm Complexity              | 0.541  | -0.025 | 0.363  | 0.361  | 0.032  | 0.188  | 0.012  | 0.004  | 0.042  | 0.019   | 0.076   | -0.102  | 0.022   | 0.049   | -0.065  | -0.036  | 0.029   | -0.142  | 0.004   | 0.042   | -0.108  | 0.023   | -0.018  | 0.014   | -0.009  | 0.057   | -0.026  | -0.048  | 0.019   | 0       | -0.039  | 0.12    |
| TIC lbp 3D m1 ngtdm Contrast                | 0.023  | -0.282 | 0.225  | 0.581  | 0.099  | 0.248  | 0.08   | 0.033  | 0.074  | 0.043   | 0.047   | -0.116  | 0.016   | 0.088   | -0.079  | 0.058   | 0.102   | 0.044   | -0.069  | -0.186  | 0.047   | -0.07   | -0.017  | -0.059  | 0.056   | 0       | 0.143   | 0.014   | 0.052   | 0.012   | 0.036   | 0.035   |
| TIC lbp 3D m2 firstorder 90Percentile       | 0.292  | -0.182 | -0.508 | 0.391  | 0.158  | 0.167  | 0.067  | 0.035  | 0.133  | 0.025   | 0.091   | -0.098  | 0.014   | 0.022   | -0.063  | 0.04    | -0.081  | -0.139  | -0.092  | -0.039  | -0.034  | -0.001  | -0.072  | 0.092   | 0.068   | -0.017  | 0       | 0.02    | -0.07   | -0.021  | -0.022  | -0.047  |
| TIC lbp 3D m2 firstorder InterquartileRange | 0.367  | -0.009 | 0.567  | 0.265  | 0.057  | 0.1    | 0.084  | 0.016  | 0.114  | 0.035   | 0.113   | -0.077  | 0.031   | -0.067  | -0.067  | 0.006   | 0.196   | -0.057  | -0.048  | -0.074  | -0.038  | 0.083   | 0.022   | -0.043  | 0.049   | 0.123   | 0.012   | -0.087  | 0.027   | 0.006   | -0.057  | -0.073  |
| TIC lbp 3D m2 firstorder Kurtosis           | -0.121 | -0.043 | -0.499 | -0.203 | -0.01  | 0.087  | -0.104 | 0.017  | 0.216  | -0.074  | -0.159  | -0.061  | 0.025   | 0.092   | -0.023  | -0.013  | -0.361  | 0.021   | 0.04    | 0.242   | -0.064  | -0.021  | -0.033  | 0.074   | -0.082  | -0.146  | 0.031   | 0.08    | -0.088  | -0.069  | 0.12    | 0.047   |
| TIC lbp 3D m2 firstorder Median             | 0.115  | -0.112 | -0.774 | 0.013  | 0.141  | 0.082  | 0.02   | 0.015  | 0.021  | 0.044   | 0.024   | -0.118  | 0.004   | -0.012  | -0.062  | 0.067   | -0.035  | -0.02   | -0.066  | -0.053  | 0.004   | -0.031  | -0.014  | 0.048   | 0.008   | -0.035  | 0.026   | -0.045  | 0.013   | 0.004   | -0.038  | -0.012  |
| TIC lbp 3D m2 firstorder Range              | 0.59   | 0.116  | -0.183 | 0.188  | 0.049  | 0.032  | 0.088  | 0.098  | 0.076  | -0.185  | 0.002   | -0.089  | -0.106  | -0.064  | 0.047   | 0.026   | -0.024  | -0.102  | 0.141   | 0.187   | -0.137  | -0.029  | 0.028   | 0.09    | 0.11    | -0.09   | -0.051  | -0.066  | -0.001  | -0.141  | -0.052  | -0.016  |
| TIC lbp 3D m2 firstorder Skewness           | 0.132  | 0.107  | 0.73   | 0.145  | 0.124  | 0.064  | -0.001 | 0.027  | -0.06  | -0.082  | -0.043  | 0.101   | -0.027  | 0.018   | 0.037   | -0.047  | -0.054  | -0.018  | 0.012   | 0.159   | -0.046  | -0.038  | -0.01   | -0.06   | 0.006   | -0.019  | 0.011   | 0.099   | -0.045  | -0.063  | 0.055   | -0.008  |
| TIC lbp 3D m2 firstorder Uniformity         | -0.676 | -0.041 | -0.058 | -0.298 | -0.06  | 0.087  | -0.121 | 0.014  | 0.136  | -0.011  | -0.134  | -0.041  | 0.032   | 0.018   | -0.031  | -0.034  | -0.092  | 0.007   | 0.148   | 0.056   | -0.02   | 0.097   | -0.019  | 0.047   | -0.1    | -0.053  | 0.05    | 0.024   | 0.029   | 0.041   | 0.096   | 0.073   |
| TIC lbp 3D m2 glcm Autocorrelation          | 0.174  | -0.196 | -0.691 | 0.126  | 0.178  | 0.106  | -0.002 | 0.031  | 0.065  | 0.101   | 0.026   | -0.128  | 0.017   | -0.009  | -0.118  | 0.039   | -0.102  | -0.069  | -0.056  | 0.042   | -0.012  | -0.037  | -0.01   | 0.066   | 0.056   | 0.004   | 0.02    | -0.001  | -0.08   | -0.012  | -0.028  | -0.079  |
| TIC lbp 3D m2 glcm ClusterShade             | 0.019  | 0.091  | 0.7    | 0.155  | 0.124  | 0.032  | -0.008 | 0.047  | 0.022  | -0.101  | -0.096  | 0.063   | 0.139   | 0.051   | 0.061   | -0.034  | -0.127  | -0.036  | -0.043  | 0.108   | -0.006  | 0.097   | -0.026  | -0.057  | -0.107  | -0.062  | -0.018  | 0.06    | -0.037  | -0.121  | 0.055   | -0.017  |
| TIC lbp 3D m2 glcm ClusterTendency          | 0.268  | -0.032 | 0.438  | 0.437  | 0.036  | 0.122  | 0.042  | -0.05  | 0.181  | -0.084  | 0.13    | -0.024  | -0.013  | -0.043  | 0.008   | 0.042   | 0.069   | -0.151  | -0.13   | 0.083   | -0.034  | 0.051   | -0.046  | 0.088   | 0.02    | 0.123   | 0.005   | -0.133  | -0.047  | -0.043  | -0.038  | -0.224  |

| TIC feature name                      | TIC F1 | TIC F2 | TIC F3 | TIC F4 | TIC F5 | TIC F6 | TIC F7 | TIC F8 | TIC F9 | TIC F10 | TIC F11 | TIC F12 | TIC F13 | TIC F14 | TIC F15 | TIC F16 | TIC F17 | TIC F18 | TIC F19 | TIC F20 | TIC F21 | TIC F22 | TIC F23 | TIC F24 | TIC F25 | TIC F26 | TIC F27 | TIC F28 | TIC F29 | TIC F30 | TIC F31 | TIC F32 |
|---------------------------------------|--------|--------|--------|--------|--------|--------|--------|--------|--------|---------|---------|---------|---------|---------|---------|---------|---------|---------|---------|---------|---------|---------|---------|---------|---------|---------|---------|---------|---------|---------|---------|---------|
| TIC lbp 3D m2 glm Correlation         | 0.216  | 0.108  | 0.055  | -0.453 | 0.036  | 0.018  | -0.11  | 0.039  | 0.05   | -0.092  | -0.002  | 0.026   | -0.139  | -0.008  | -0.01   | 0.09    | 0.119   | -0.169  | -0.066  | 0.133   | 0.087   | 0.054   | 0.058   | 0.022   | -0.095  | 0.04    | 0.036   | -0.083  | -0.071  | 0.022   | 0.045   | -0.491  |
| TIC lbp 3D m2 glm DifferenceAverage   | 0.127  | -0.049 | 0.402  | 0.639  | 0.05   | 0.095  | 0.103  | 0.021  | 0.113  | -0.01   | 0.11    | -0.015  | 0.081   | -0.074  | 0.026   | -0.038  | -0.003  | -0.036  | -0.082  | -0.006  | -0.065  | 0.043   | -0.058  | 0.067   | 0.056   | 0.079   | -0.022  | -0.068  | -0.03   | -0.072  | -0.066  | 0.022   |
| TIC lbp 3D m2 glm DifferenceEntropy   | 0.708  | 0.036  | 0.126  | 0.35   | 0.06   | 0.011  | 0.082  | 0.001  | 0.083  | -0.013  | 0.069   | -0.046  | 0.003   | -0.061  | 0.02    | -0.02   | 0.026   | 0.001   | -0.028  | 0.034   | -0.07   | 0.028   | -0.068  | 0.053   | 0.033   | 0.068   | -0.014  | -0.065  | 0.032   | 0.004   | -0.012  | 0.022   |
| TIC lbp 3D m2 glm DifferenceVariance  | 0.255  | -0.093 | 0.306  | 0.578  | 0.065  | 0.163  | 0.078  | 0.049  | 0.183  | -0.09   | 0.153   | -0.042  | -0.018  | 0.002   | 0.003   | 0.039   | 0.018   | -0.051  | -0.096  | 0.073   | -0.092  | 0.018   | -0.078  | 0.06    | 0.074   | 0.106   | 0.009   | -0.134  | 0.022   | -0.029  | -0.034  | 0.073   |
| TIC lbp 3D m2 glm Idm                 | -0.099 | -0.067 | -0.372 | -0.588 | 0.061  | 0.01   | -0.111 | 0.012  | 0.057  | -0.095  | -0.047  | -0.018  | -0.103  | 0.136   | -0.068  | 0.098   | 0.116   | -0.011  | 0.093   | 0.09    | 0.052   | 0.013   | 0.085   | -0.067  | -0.111  | -0.084  | 0.087   | -0.019  | 0.08    | 0.065   | 0.145   | 0.062   |
| TIC lbp 3D m2 glm Idn                 | 0.207  | 0.071  | -0.492 | -0.517 | 0.038  | 0.062  | -0.063 | 0.054  | 0.158  | -0.111  | -0.051  | -0.024  | -0.128  | 0.065   | 0.008   | 0.031   | 0.02    | 0.014   | 0.127   | 0.101   | 0.007   | -0.021  | 0.068   | 0.017   | -0.024  | -0.115  | -0.037  | 0.055   | 0.059   | -0.025  | 0.053   | 0.007   |
| TIC lbp 3D m2 glm InverseVariance     | -0.057 | -0.035 | -0.426 | -0.587 | 0.078  | -0.01  | -0.132 | 0.016  | 0.051  | -0.031  | -0.062  | -0.04   | -0.149  | 0.12    | -0.018  | 0.142   | 0.038   | -0.047  | 0.062   | -0.123  | 0.032   | -0.072  | 0.02    | -0.039  | -0.034  | -0.05   | 0.045   | 0.024   | 0.038   | 0.091   | 0.053   | 0.045   |
| TIC lbp 3D m2 glm MaximumProbability  | -0.751 | -0.057 | 0.139  | -0.092 | -0.09  | 0.025  | -0.068 | 0.024  | 0.186  | -0.081  | -0.012  | -0.044  | -0.002  | 0.011   | -0.011  | 0.024   | -0.016  | 0.024   | 0.079   | 0.1     | 0.014   | 0.018   | -0.002  | 0.034   | -0.062  | -0.095  | 0.081   | 0.016   | 0.03    | 0.005   | 0.046   | 0.014   |
| TIC lbp 3D m2 glm SumEntropy          | 0.786  | 0.074  | -0.011 | 0.122  | 0.042  | 0.028  | 0.047  | 0.015  | 0.102  | -0.02   | 0.054   | -0.035  | -0.056  | -0.035  | 0.035   | -0.013  | 0.053   | -0.063  | -0.021  | -0.017  | -0.035  | 0.014   | -0.044  | 0.057   | 0.009   | 0.072   | -0.002  | -0.06   | 0.025   | 0.062   | -0.001  | -0.084  |
| TIC lbp 3D m2 glrlm GravLevelVariance | 0.282  | -0.059 | 0.358  | 0.518  | 0.034  | 0.183  | 0.102  | 0.031  | 0.177  | -0.053  | 0.186   | -0.107  | -0.043  | -0.026  | -0.009  | 0.006   | 0.143   | -0.128  | -0.041  | -0.018  | -0.044  | 0.01    | -0.038  | 0.03    | 0.077   | 0.078   | 0.03    | -0.121  | -0.012  | 0.05    | -0.074  | -0.084  |
| TIC lbp 3D m2 glrlm RunEntropy        | 0.667  | 0.003  | -0.347 | 0.239  | 0.097  | 0.057  | 0.07   | 0.009  | 0.162  | -0.074  | 0.063   | 0.016   | -0.057  | 0.016   | 0.042   | -0.002  | 0.04    | -0.06   | -0.049  | 0.059   | 0.003   | -0.021  | 0.015   | -0.017  | 0.041   | 0.017   | -0.01   | -0.031  | -0.007  | 0.018   | -0.016  | -0.036  |
| TIC lbp 3D m2 glszm GLNUN             | -0.613 | -0.018 | 0.428  | -0.257 | 0.041  | -0.05  | -0.082 | 0.023  | 0.037  | 0.088   | -0.056  | 0.071   | 0.082   | -0.014  | -0.058  | -0.037  | 0.018   | 0.028   | 0.015   | -0.086  | 0.05    | 0.081   | 0.046   | -0.011  | -0.067  | 0.049   | -0.035  | 0.031   | 0.001   | -0.037  | -0.016  | 0.008   |
| TIC lbp 3D m2 glszm GravLevelVariance | 0.318  | -0.067 | -0.165 | -0.523 | 0.066  | 0.222  | 0.087  | 0.026  | 0.141  | -0.107  | 0.118   | -0.199  | -0.16   | -0.007  | 0.002   | -0.056  | 0.112   | -0.166  | 0.056   | 0.068   | -0.079  | 0.022   | -0.019  | 0.014   | 0.122   | 0.02    | 0.069   | -0.01   | -0.026  | 0.167   | 0.029   | 0.049   |
| TIC lbp 3D m2 glszm HGLZE             | 0.195  | -0.141 | -0.703 | 0.149  | 0.151  | 0.109  | 0.046  | 0.043  | 0.044  | 0.06    | 0.014   | -0.16   | 0.012   | 0.003   | -0.13   | 0.061   | -0.038  | -0.023  | -0.013  | -0.008  | 0       | -0.009  | -0.041  | 0.038   | 0.02    | -0.086  | 0.054   | 0.017   | -0.056  | 0.019   | 0.065   | 0.026   |
| TIC lbp 3D m2 glszm LALGLE            | 0.002  | 0.1    | 0.542  | -0.124 | 0.051  | -0.12  | -0.058 | 0.116  | 0.112  | -0.072  | -0.043  | 0.015   | 0.004   | -0.059  | -0.021  | -0.037  | 0.3     | 0.071   | 0.199   | -0.029  | 0.143   | 0.207   | -0.125  | 0.083   | -0.117  | 0.099   | -0.022  | -0.091  | 0.024   | 0.182   | 0.044   | -0.004  |
| TIC lbp 3D m2 glszm LGLZE             | -0.229 | 0.071  | 0.67   | 0.024  | 0.059  | 0.008  | -0.032 | 0.005  | 0.107  | 0.011   | 0.048   | -0.014  | -0.083  | -0.026  | 0.04    | -0.151  | 0.167   | -0.106  | 0.106   | -0.091  | -0.061  | 0.135   | 0.033   | 0.032   | 0.039   | 0.121   | -0.063  | -0.017  | 0.02    | 0.145   | -0.038  | 0.053   |
| TIC lbp 3D m2 glszm SmallAreaEmphasis | -0.018 | 0.062  | 0.62   | 0.199  | 0.086  | 0.164  | -0.039 | 0.012  | 0.076  | 0.074   | 0.048   | -0.1    | 0.098   | 0.041   | -0.094  | 0.015   | -0.193  | -0.142  | -0.068  | -0.205  | -0.1    | -0.121  | -0.082  | 0.132   | 0.068   | -0.045  | -0.024  | 0.001   | -0.058  | 0.005   | -0.066  | 0.038   |
| TIC lbp 3D m2 glszm SAHGLE            | 0.164  | -0.087 | -0.534 | 0.238  | 0.082  | 0.215  | 0.056  | 0.047  | 0.001  | 0.107   | 0.021   | -0.257  | 0.033   | -0.011  | -0.207  | 0.09    | -0.063  | -0.077  | -0.021  | -0.114  | -0.005  | -0.091  | -0.077  | 0.052   | 0.069   | -0.154  | 0.07    | 0.039   | -0.071  | 0.035   | 0.12    | 0.095   |
| TIC lbp 3D m2 glszm SALGLE            | -0.282 | 0.065  | 0.62   | 0.113  | 0.065  | 0.033  | -0.042 | 0.024  | 0.145  | 0.048   | 0.022   | -0.042  | -0.081  | 0.022   | 0.036   | -0.132  | 0.085   | -0.175  | 0.08    | -0.082  | -0.111  | 0.12    | 0.044   | 0.011   | 0.056   | 0.107   | -0.104  | 0.055   | 0.033   | 0.158   | -0.043  | 0.085   |
| TIC lbp 3D m2 glszm ZoneEntropy       | 0.623  | 0.003  | -0.484 | -0.006 | 0.117  | 0.066  | 0.033  | 0.01   | 0.158  | -0.031  | 0.001   | 0.068   | -0.034  | 0.014   | 0.02    | -0.014  | 0.033   | 0.011   | 0.028   | 0.077   | 0.04    | 0.088   | 0.014   | -0.034  | -0.021  | 0.021   | -0.013  | -0.005  | 0.016   | 0.009   | 0.024   | -0.012  |
| TIC lbp 3D m2 gldm DependenceVariance | 0.222  | -0.158 | -0.648 | -0.007 | 0.147  | 0.031  | -0.094 | 0.025  | 0.019  | -0.127  | -0.08   | 0.024   | -0.035  | 0.131   | -0.003  | -0.043  | -0.045  | -0.068  | 0.111   | 0.204   | 0.021   | 0.12    | -0.025  | 0.065   | -0.077  | -0.033  | 0.069   | -0.068  | 0.044   | 0.098   | 0.054   | -0.004  |
| TIC lbp 3D m2 gldm LDLGLE             | -0.024 | 0.1    | 0.639  | -0.081 | 0.005  | 0.117  | -0.024 | 0.097  | 0.046  | -0.052  | 0.014   | -0.016  | 0.011   | -0.05   | -0.029  | -0.02   | 0.293   | 0.145   | 0.145   | -0.075  | 0.124   | 0.155   | -0.094  | 0.06    | -0.079  | 0.074   | -0.01   | -0.122  | 0.032   | 0.134   | 0.026   | 0.001   |
| TIC lbp 3D m2 ngtdm Complexity        | 0.337  | 0.044  | 0.392  | 0.403  | 0.06   | 0.099  | 0.108  | 0.053  | 0.024  | -0.075  | 0.151   | -0.11   | -0.02   | -0.053  | 0.007   | -0.092  | 0.109   | -0.022  | 0.114   | -0.004  | -0.088  | 0.1     | 0.01    | 0.19    | 0.073   | 0.023   | -0.178  | -0.045  | 0.083   | -0.051  | -0.102  | 0.158   |
| TIC lbp 3D m2 ngtdm Contrast          | 0.023  | -0.094 | 0.52   | 0.455  | 0.028  | 0.145  | 0.078  | -0.06  | 0.196  | 0.059   | 0.135   | -0.086  | 0.056   | -0.023  | -0.028  | -0.017  | 0.129   | -0.091  | -0.094  | -0.119  | -0.01   | 0.013   | -0.071  | -0.04   | 0.025   | 0.101   | 0.063   | -0.134  | -0.028  | 0.079   | -0.065  | -0.042  |
| TIC lbp 3D k firstorder 10Percentile  | 0.28   | -0.14  | 0.235  | 0.476  | 0.096  | 0.001  | 0.07   | 0.07   | 0.113  | 0.016   | -0.002  | 0.039   | -0.075  | 0.18    | 0.084   | 0.015   | -0.115  | 0.02    | 0.035   | 0.059   | 0.034   | -0.119  | 0.05    | -0.062  | 0.151   | -0.018  | 0.066   | 0.325   | 0.017   | -0.009  | -0.036  | -0.049  |
| TIC lbp 3D k firstorder 90Percentile  | 0.156  | -0.22  | 0.142  | 0.306  | 0.078  | 0.655  | -0.013 | 0.019  | 0.055  | 0.003   | 0.07    | -0.052  | 0.004   | 0.045   | 0.047   | 0.018   | -0.051  | -0.035  | -0.05   | -0.003  | 0.027   | -0.049  | -0.013  | -0.049  | 0.104   | -0.027  | 0.016   | 0.137   | 0.013   | 0.045   | -0.046  | 0.051   |
| TIC lbp 3D k firstorder Maximum       | 0.378  | -0.1   | 0.049  | 0.17   | 0.11   | 0.352  | -0.026 | 0.009  | 0.051  | 0.001   | 0.562   | -0.005  | 0.034   | 0.013   | 0.02    | -0.061  | -0.027  | 0.005   | -0.079  | 0.001   | -0.003  | 0.068   | 0.025   | -0.006  | 0.09    | 0.048   | -0.036  | -0.002  | 0.004   | 0.013   | 0.012   | 0.026   |
| TIC lbp 3D k firstorder Minimum       | -0.417 | -0.084 | -0.015 | 0.058  | 0.099  | 0.015  | 0.056  | 0.018  | 0.125  | 0.024   | -0.112  | 0.028   | -0.15   | 0.188   | 0.098   | 0.014   | 0.032   | -0.01   | 0.215   | -0.187  | -0.035  | -0.199  | -0.062  | -0.159  | 0.065   | 0.098   | 0.285   | 0.218   | -0.097  | 0.049   | 0.127   | -0.041  |
| TIC lbp 3D k firstorder RMAD          | 0.02   | -0.145 | 0.085  | 0.158  | 0.057  | 0.755  | -0.007 | 0.043  | 0.027  | -0.015  | 0.042   | -0.044  | 0.037   | 0.004   | 0.043   | 0.098   | -0.047  | -0.01   | -0.087  | -0.033  | 0.003   | -0.007  | -0.05   | -0.032  | 0.083   | 0.016   | -0.064  | 0.021   | 0.018   | 0.039   | -0.074  | 0.07    |



| TIC feature name                     | TIC F1 | TIC F2 | TIC F3 | TIC F4 | TIC F5 | TIC F6 | TIC F7 | TIC F8 | TIC F9 | TIC F10 | TIC F11 | TIC F12 | TIC F13 | TIC F14 | TIC F15 | TIC F16  | TIC F17 | TIC F18 | TIC F19 | TIC F20 | TIC F21 | TIC F22 | TIC F23 | TIC F24 | TIC F25 | TIC F26 | TIC F27 | TIC F28 | TIC F29 | TIC F30 | TIC F31 | TIC F32 |
|--------------------------------------|--------|--------|--------|--------|--------|--------|--------|--------|--------|---------|---------|---------|---------|---------|---------|----------|---------|---------|---------|---------|---------|---------|---------|---------|---------|---------|---------|---------|---------|---------|---------|---------|
| TIC lbp 3D k firstorder Skewness     | 0.211  | -0.059 | 0.073  | 0.064  | 0.002  | 0.21   | 0.036  | 0.051  | 0.079  | -0.01   | 0.697   | 0.012   | -0.054  | 0.055   | -0.113  | -0.087   | 0.115   | -0.079  | -0.024  | -0.024  | -0.051  | 0.044   | 0.051   | 0.065   | 0.043   | 0.087   | 0.044   | -0.04   | 0.004   | 0.019   | 0.039   | -0.047  |
| TIC lbp 3D k glm ClusterShade        | 0.096  | -0.114 | 0.009  | 0.15   | -0.03  | 0.537  | 0.001  | 0.056  | 0.174  | -0.021  | 0.5     | -0.034  | 0.013   | -0.049  | 0.052   | 0.005    | 0.052   | 0.02    | -0.097  | -0.12   | -0.041  | -0.061  | -0.027  | -0.002  | -0.035  | -0.026  | -0.014  | -0.013  | 0.029   | 0.042   | -0.032  | -0.117  |
| TIC lbp 3D k glm Contrast            | -0.136 | -0.118 | 0.025  | 0.145  | 0.002  | 0.757  | -0.008 | 0.046  | 0.053  | 0.011   | 0.15    | -0.016  | 0.104   | 0.023   | -0.026  | -0.067   | -0.003  | -0.016  | -0.034  | -0.024  | -0.027  | -0.013  | -0.038  | -0.03   | -0.045  | 0.012   | 0.01    | -0.016  | -0.011  | -0.057  | 0.011   | -0.074  |
| TIC lbp 3D k glm Correlation         | 0.494  | -0.209 | -0.019 | -0.099 | 0.079  | 0.104  | -0.043 | 0.007  | 0.056  | -0.064  | 0.354   | -0.045  | -0.081  | -0.098  | 0.162   | -0.064   | 0.027   | -0.06   | -0.096  | -0.186  | 0.007   | -0.086  | 0.087   | 0.002   | 0.034   | -0.075  | -0.152  | 0.081   | 0.017   | 0.124   | -0.176  | 0.027   |
| TIC lbp 3D k glm DifferenceAverage   | -0.23  | -0.089 | -0.079 | 0.053  | 0.015  | 0.746  | -0.021 | 0.049  | 0.003  | 0.022   | 0.11    | -0.034  | 0.093   | 0.004   | -0.07   | -0.05    | 0.039   | 0.004   | -0.016  | -0.028  | -0.055  | -0.01   | -0.035  | -0.031  | -0.071  | 0.017   | 0.019   | -0.135  | 0       | -0.017  | -0.003  | -0.06   |
| TIC lbp 3D k glm Imc2                | -0.471 | -0.226 | 0.249  | 0.009  | 0.127  | 0.357  | -0.053 | -0.03  | 0.194  | -0.022  | 0.287   | -0.07   | 0.073   | -0.046  | -0.02   | -0.03    | -0.011  | -0.087  | -0.099  | -0.057  | 0.029   | -0.086  | 0.073   | -0.017  | -0.024  | -0.117  | -0.04   | 0       | -0.083  | -0.082  | -0.073  | -0.007  |
| TIC lbp 3D k glm Idmn                | 0.629  | -0.088 | 0.139  | 0.08   | 0.057  | 0.142  | -0.009 | 0.016  | 0.078  | 0.01    | 0.386   | -0.011  | -0.012  | 0.028   | 0.084   | -0.043   | 0.004   | -0.058  | -0.059  | 0.014   | 0.035   | 0.045   | 0.057   | 0.034   | 0.089   | -0.03   | 0.013   | 0.102   | -0.06   | -0.083  | -0.02   | 0.127   |
| TIC lbp 3D k glm InverseVariance     | -0.335 | 0.071  | -0.226 | -0.18  | 0.074  | 0.342  | -0.103 | 0.004  | 0.062  | 0.008   | -0.032  | 0.027   | 0.077   | -0.044  | -0.182  | 0.046    | 0.1     | 0.083   | -0.015  | 0.088   | -0.096  | 0.091   | -0.019  | 0.028   | -0.099  | -0.068  | 0.014   | -0.435  | 0.06    | 0.025   | -0.092  | -0.08   |
| TIC lbp 3D k glm MaximumProbability  | 0.346  | 0      | 0.212  | 0.259  | 0.072  | -0.48  | 0.068  | 0.014  | 0.042  | 0.001   | -0.044  | -0.034  | -0.133  | 0.03    | 0.142   | 0.087    | -0.063  | -0.028  | 0.031   | 0.035   | 0.104   | -0.061  | -0.013  | -0.014  | 0.136   | 0.027   | 0.031   | 0.34    | 0.002   | -0.018  | 0.045   | 0.089   |
| TIC lbp 3D k glrlm GLNUN             | -0.121 | 0.144  | 0.375  | -0.083 | 0.128  | 0.653  | 0.023  | 0.005  | 0.087  | 0.075   | -0.06   | 0.049   | -0.014  | 0.035   | -0.02   | 0.076    | -0.023  | 0.092   | 0.027   | 0.027   | -0.006  | 0.024   | 0.001   | -0.032  | -0.073  | 0.027   | -0.013  | 0.108   | 0.013   | -0.03   | 0.01    | -0.095  |
| TIC lbp 3D k glrlm LRLGLE            | 0.095  | 0.006  | -0.669 | -0.13  | 0.187  | 0.254  | -0.075 | 0.077  | 0.169  | -0.085  | -0.106  | 0.11    | 0.009   | -0.022  | 0.015   | -0.081   | -0.033  | -0.022  | 0.008   | 0.017   | 0.005   | 0.144   | 0.01    | 0.023   | -0.064  | 0.034   | -0.083  | -0.07   | -0.078  | -0.001  | 0.02    | -0.013  |
| TIC lbp 3D k glrlm RunEntropy        | 0.434  | -0.118 | -0.59  | 0.155  | 0.205  | 0.135  | -0.001 | -0.03  | 0.099  | -0.067  | 0.019   | 0.032   | -0.076  | 0.009   | 0.085   | -0.067   | -0.003  | -0.05   | 0.017   | -0.009  | 0.02    | 0.023   | -0.001  | -0.016  | 0.064   | 0.048   | -0.031  | 0.112   | -0.022  | 0.042   | -0.007  | 0.048   |
| TIC lbp 3D k glrlm ShortRunEmphasis  | -0.227 | 0.049  | 0.658  | -0.091 | 0.154  | 0.306  | -0.01  | 0.046  | 0.076  | 0.074   | 0.098   | -0.082  | 0.082   | -0.024  | -0.109  | 0.034    | 0.061   | -0.008  | -0.033  | -0.026  | -0.03   | -0.052  | -0.004  | 0.005   | -0.042  | -0.019  | 0.057   | -0.131  | 0.041   | -0.005  | -0.015  | -0.016  |
| TIC lbp 3D k glrlm SRHGLE            | 0.143  | -0.169 | 0.358  | 0.265  | 0.034  | 0.595  | 0.031  | 0.036  | 0.115  | 0.018   | 0.168   | -0.052  | -0.012  | 0.051   | -0.002  | 0.00E+00 | 0.018   | -0.059  | -0.012  | -0.022  | -0.013  | -0.064  | -0.021  | -0.054  | 0.074   | -0.011  | 0.05    | 0.148   | 0.041   | 0.01    | -0.021  | -0.006  |
| TIC lbp 3D k glrlm SRLGLE            | -0.351 | 0.228  | -0.162 | -0.423 | 0.108  | 0.263  | -0.058 | 0.029  | 0.104  | -0.015  | -0.065  | 0.008   | 0.083   | -0.141  | -0.049  | -0.019   | 0.059   | 0.045   | -0.019  | -0.033  | 0.001   | 0.07    | 0.028   | 0.104   | -0.132  | 0.008   | -0.032  | -0.364  | -0.012  | -0.012  | 0.025   | -0.026  |
| TIC lbp 3D k glszm GLNU              | 0.429  | 0.059  | 0.102  | 0.192  | 0.057  | 0.043  | 0.126  | 0.072  | 0.614  | 0.03    | -0.079  | -0.02   | 0.083   | 0.041   | -0.018  | 0.022    | 0.024   | -0.018  | -0.034  | -0.005  | -0.084  | -0.078  | -0.106  | 0.006   | 0.044   | -0.011  | 0.067   | -0.032  | 0.008   | 0.046   | 0.057   | 0.009   |
| TIC lbp 3D k glszm GLNUN             | -0.074 | 0.296  | -0.166 | -0.075 | -0.09  | 0.438  | -0.031 | 0.076  | 0.075  | -0.005  | -0.32   | 0.156   | 0.12    | -0.032  | -0.154  | 0.042    | -0.205  | 0.023   | 0.023   | 0.015   | -0.159  | 0.125   | -0.024  | 0.006   | -0.069  | -0.051  | -0.14   | -0.113  | 0.024   | 0.021   | 0.055   | -0.029  |
| TIC lbp 3D k glszm GrayLevelVariance | 0.323  | -0.052 | 0.236  | 0.164  | 0.134  | 0.309  | 0.046  | 0.079  | 0.085  | 0.012   | 0.484   | -0.097  | -0.073  | -0.015  | 0.155   | -0.026   | 0.149   | -0.044  | -0.11   | -0.062  | 0.089   | -0.097  | 0.026   | -0.018  | 0.099   | -0.078  | 0.081   | 0.124   | 0.06    | 0.025   | 0.004   | -0.042  |
| TIC lbp 3D k glszm HGLZE             | 0.381  | -0.097 | -0.345 | 0.088  | 0.147  | 0.456  | -0.025 | 0.052  | 0.035  | -0.04   | 0.232   | 0.04    | -0.03   | -0.02   | -0.02   | -0.031   | 0.136   | 0.004   | 0.041   | -0.032  | -0.045  | 0.247   | -0.004  | 0.041   | 0.019   | 0.021   | -0.145  | 0.052   | 0.055   | -0.03   | 0.04    | -0.01   |
| TIC lbp 3D k glszm LGLZE             | -0.1   | 0.042  | 0.559  | 0.013  | 0.032  | 0.285  | 0.062  | 0.116  | 0.009  | 0.069   | 0.003   | -0.083  | -0.019  | -0.02   | 0.157   | 0.009    | -0.031  | 0.006   | -0.132  | -0.057  | 0.167   | -0.321  | 0.026   | -0.044  | 0.047   | -0.034  | 0.229   | 0.066   | -0.012  | 0.073   | -0.028  | -0.001  |
| TIC lbp 3D k glszm SZNU              | 0.435  | -0.024 | 0.156  | 0.212  | 0.136  | 0.022  | 0.151  | 0.07   | 0.557  | 0.025   | 0.001   | -0.038  | 0.055   | 0.044   | 0.041   | 0.033    | 0.083   | -0.029  | -0.054  | -0.001  | -0.083  | 0.047   | -0.104  | 0.008   | 0.046   | 0.028   | 0.11    | -0.003  | 0.016   | 0.104   | 0.029   | 0.02    |
| TIC lbp 3D k glszm SZNUN             | 0.188  | -0.066 | 0.148  | -0.091 | 0.053  | 0.275  | 0.005  | 0.056  | 0.042  | 0.037   | 0.054   | 0.13    | 0.073   | -0.001  | 0.068   | 0.019    | 0.117   | -0.028  | 0.011   | -0.157  | 0.056   | 0.63    | -0.021  | 0.141   | -0.059  | 0.03    | 0.037   | -0.063  | -0.03   | 0.009   | -0.015  | -0.026  |
| TIC lbp 3D k glszm SAHGLE            | 0.509  | -0.08  | -0.108 | 0.024  | 0.114  | 0.2    | -0.031 | 0.044  | 0.042  | -0.018  | 0.273   | 0.072   | -0.028  | -0.043  | 0.048   | 0.034    | 0.171   | -0.018  | -0.007  | -0.035  | 0.017   | 0.456   | -0.034  | 0.077   | 0.043   | 0.002   | -0.124  | 0.022   | 0.027   | -0.032  | 0.016   | 0.006   |
| TIC lbp 3D k glszm SALGLE            | 0.362  | -0.002 | 0.468  | 0.005  | 0.014  | 0.254  | 0.052  | 0.092  | 0.045  | 0.054   | -0.018  | -0.039  | 0.1     | 0.04    | 0.05    | -0.05    | -0.064  | -0.079  | -0.063  | -0.094  | 0.118   | -0.058  | 0.049   | 0.098   | -0.057  | -0.14   | 0.371   | -0.017  | -0.016  | -0.019  | -0.053  | -0.094  |
| TIC lbp 3D k glszm ZoneEntropy       | 0.524  | -0.071 | 0.025  | 0.181  | 0.055  | 0.405  | 0.057  | 0.122  | 0.135  | 0.031   | 0.168   | -0.131  | -0.082  | 0.043   | 0.007   | -0.037   | 0.027   | -0.133  | -0.048  | 0.027   | -0.006  | -0.269  | 0.027   | 0       | 0.047   | 0.017   | 0.061   | 0.084   | -0.041  | 0.023   | -0.029  | 0.03    |
| TIC lbp 3D k glszm ZonePercentage    | -0.189 | -0.085 | 0.657  | 0.14   | 0.091  | 0.269  | 0.023  | 0.029  | 0.096  | -0.013  | 0.06    | -0.041  | 0.055   | 0.082   | -0.073  | 0.032    | -0.118  | -0.148  | -0.062  | 0.06    | -0.024  | -0.05   | -0.065  | 0.031   | 0.069   | -0.015  | 0.101   | 0.048   | -0.061  | -0.02   | -0.002  | 0.029   |
| TIC lbp 3D k gldm DependenceEntropy  | 0.618  | -0.096 | -0.43  | 0.081  | 0.08   | 0.108  | -0.025 | 0.011  | 0.055  | -0.078  | 0.009   | 0.002   | -0.061  | 0.01    | 0.049   | -0.039   | -0.052  | -0.11   | 0.003   | 0.034   | 0.007   | -0.092  | -0.01   | -0.01   | 0.062   | 0.112   | 0.005   | 0.098   | -0.017  | 0.081   | -0.058  | 0.081   |
| TIC lbp 3D k gldm DependenceVariance | 0.404  | -0.105 | -0.452 | 0.233  | 0.248  | 0.156  | -0.037 | 0.082  | 0.096  | -0.124  | -0.083  | 0.021   | -0.116  | -0.021  | 0.099   | -0.02    | -0.048  | -0.067  | 0.044   | 0.074   | 0.048   | -0.041  | 0.009   | -0.003  | 0.126   | 0.122   | 0.076   | 0.159   | -0.062  | -0.008  | 0.003   | 0.071   |
| TIC lbp 3D k gldm SDE                | -0.009 | -0.065 | 0.714  | 0.091  | -0.09  | 0.265  | 0.008  | 0.026  | 0.117  | -0.004  | 0.058   | -0.063  | 0.072   | 0.051   | -0.077  | 0.071    | -0.068  | -0.107  | -0.036  | 0.048   | -0.026  | 0.029   | -0.068  | 0.044   | 0.041   | -0.045  | 0.101   | 0.008   | -0.029  | -0.049  | -0.013  | 0.027   |
| TIC lbp 3D k gldm SDHGLE             | 0.073  | -0.081 | 0.559  | 0.175  | 0.054  | 0.434  | 0.012  | 0.015  | 0.144  | -0.024  | 0.2     | -0.034  | 0.047   | 0.047   | -0.069  | 0.063    | 0.014   | -0.129  | -0.007  | 0.028   | -0.03   | 0.135   | -0.076  | 0.037   | 0.061   | -0.045  | 0.037   | 0.078   | 0.011   | -0.029  | -0.004  | 0.026   |
| TIC lbp 3D k gldm SDLGLE             | 0.009  | -0.02  | 0.755  | 0.02   | 0.098  | 0.079  | 0.012  | 0.043  | -0.09  | 0.02    | -0.021  | -0.09   | 0.065   | 0.022   | -0.026  | 0.063    | -0.098  | -0.058  | -0.091  | 0.047   | 0.009   | -0.094  | -0.041  | 0.06    | 0.031   | -0.052  | 0.162   | -0.046  | -0.044  | -0.061  | -0.011  | 0.001   |

| TIC feature name              | TIC F1 | TIC F2 | TIC F3 | TIC F4 | TIC F5 | TIC F6 | TIC F7 | TIC F8 | TIC F9 | TIC F10 | TIC F11 | TIC F12 | TIC F13 | TIC F14 | TIC F15 | TIC F16 | TIC F17 | TIC F18 | TIC F19 | TIC F20 | TIC F21 | TIC F22 | TIC F23 | TIC F24 | TIC F25 | TIC F26 | TIC F27 | TIC F28 | TIC F29 | TIC F30 | TIC F31 | TIC F32 |
|-------------------------------|--------|--------|--------|--------|--------|--------|--------|--------|--------|---------|---------|---------|---------|---------|---------|---------|---------|---------|---------|---------|---------|---------|---------|---------|---------|---------|---------|---------|---------|---------|---------|---------|
| TIC lbp 3D k ngtdm Busyness   | 0.286  | 0.11   | -0.346 | -0.039 | 0.065  | -0.18  | -0.026 | 0.053  | 0.46   | 0.028   | -0.235  | 0.142   | 0.039   | -0.068  | -0.108  | -0.001  | -0.048  | -0.035  | -0.016  | 0.022   | -0.03   | 0.065   | 0.005   | 0.017   | -0.117  | 0.008   | -0.182  | -0.096  | -0.02   | -0.023  | -0.002  | -0.129  |
| TIC lbp 3D k ngtdm Complexity | 0.27   | 0.009  | 0.018  | 0.163  | 0.076  | 0.369  | -0.011 | 0.036  | 0.061  | -0.008  | 0.6     | -0.046  | 0.02    | -0.009  | 0.088   | -0.045  | 0.017   | 0.009   | -0.059  | 0.007   | -0.042  | 0.084   | 0.055   | 0.011   | 0.151   | 0.051   | -0.029  | -0.021  | 0.033   | 0.024   | -0.005  | 0.078   |
| TIC lbp 3D k ngtdm Strength   | -0.302 | -0.059 | 0.267  | 0.112  | 0.076  | 0.275  | -0.062 | 0.044  | -0.22  | -0.031  | 0.534   | 0.041   | 0.018   | -0.033  | -0.027  | 0.051   | -0.057  | -0.094  | -0.076  | 0.076   | -0.003  | 0.038   | 0.011   | 0.057   | 0.066   | -0.093  | -0.035  | -0.022  | -0.087  | -0.105  | 0.029   | 0.02    |

**Table S13** Factor loadings for the 27 PF factors. The number of each feature reflect the importance weight in the factor in which it is present. In bold...\*\*\* Abbreviations: XXX

| Pathomic feature name              | PF1    | PF2    | PF3    | PF4    | PF5    | PF6    | PF7    | PF8    | PF9    | PF10   | PF11   | PF12   | PF13   | PF14   | PF15     | PF16   | PF17   | PF18   | PF19   | PF20   | PF21   | PF22   | PF23   | PF24   | PF25   | PF26   | PF27   |
|------------------------------------|--------|--------|--------|--------|--------|--------|--------|--------|--------|--------|--------|--------|--------|--------|----------|--------|--------|--------|--------|--------|--------|--------|--------|--------|--------|--------|--------|
| MEAN Nucleus Area                  | 0.15   | 0.153  | -0.071 | 0.072  | -0.267 | -0.115 | 0.074  | 0.161  | -0.181 | -0.077 | -0.027 | -0.032 | -0.674 | 0.044  | 0.019    | -0.022 | -0.04  | 0.032  | -0.004 | 0.025  | -0.009 | -0.008 | -0.007 | 0.027  | 0.018  | -0.007 | 0.006  |
| MEAN Nucleus Perimeter             | 0.218  | 0.053  | -0.038 | 0.109  | -0.284 | -0.06  | 0.07   | 0.141  | -0.132 | -0.069 | -0.019 | -0.067 | -0.646 | -0.019 | 0.00E+00 | -0.014 | -0.024 | 0.217  | 0.011  | 0.035  | 0.005  | -0.031 | -0.008 | 0.033  | 0.031  | -0.002 | 0.007  |
| MEAN Nucleus Circularity           | -0.262 | 0.306  | -0.024 | -0.107 | 0.145  | -0.178 | -0.031 | -0.017 | -0.034 | -0.043 | 0.013  | 0.124  | 0.169  | 0.062  | 0.047    | -0.059 | -0.033 | -0.584 | -0.063 | -0.048 | -0.022 | 0.038  | -0.012 | -0.031 | -0.02  | -0.001 | 0.011  |
| MEAN Nucleus MinCaliper            | 0.032  | 0.211  | -0.045 | -0.029 | -0.233 | -0.167 | 0.062  | 0.182  | -0.106 | -0.072 | -0.112 | -0.052 | -0.676 | 0.044  | 0.026    | -0.021 | -0.058 | -0.065 | 0.014  | 0.051  | -0.011 | -0.004 | 0.016  | -0.019 | -0.018 | -0.009 | -0.028 |
| MEAN Nucleus Eccentricity          | 0.356  | -0.371 | -0.004 | 0.157  | -0.251 | 0.244  | 0.045  | -0.072 | -0.11  | -0.017 | 0.12   | -0.087 | 0.011  | -0.071 | -0.068   | 0.02   | 0.014  | 0.411  | 0.036  | -0.046 | -0.063 | -0.059 | 0.011  | 0.057  | 0.051  | -0.025 | 0.055  |
| MEAN Nucleus HematoxylinODSum      | 0.323  | 0.082  | 0.054  | 0.129  | -0.171 | 0.369  | 0.064  | 0.081  | -0.029 | 0.047  | 0.001  | 0.011  | -0.205 | 0.554  | 0.085    | 0.067  | -0.028 | -0.05  | -0.001 | -0.038 | -0.025 | 0.045  | -0.027 | 0.016  | -0.009 | 0.009  | 0.009  |
| MEAN Nucleus HematoxylinODStdDev   | 0.213  | -0.034 | -0.013 | 0.059  | -0.1   | 0.506  | 0.036  | -0.064 | -0.013 | 0.024  | -0.022 | 0.027  | 0.229  | 0.479  | 0.075    | 0.12   | 0.018  | 0.055  | -0.073 | -0.039 | -0.085 | 0.071  | -0.004 | 0.076  | 0.022  | -0.069 | -0.027 |
| MEAN Nucleus HematoxylinODMin      | 0.296  | -0.012 | 0.196  | 0.133  | -0.094 | 0.278  | 0.013  | 0.008  | -0.041 | 0.065  | -0.021 | 0.06   | -0.006 | 0.604  | 0.136    | 0.015  | 0.041  | -0.149 | 0.059  | -0.029 | 0.041  | -0.022 | 0.045  | -0.011 | -0.029 | 0.052  | 0.025  |
| MEAN Nucleus EosinODMean           | -0.008 | -0.078 | 0.073  | -0.024 | -0.017 | 0.258  | 0.067  | 0.747  | -0.006 | -0.012 | 0.093  | 0.058  | 0.002  | -0.092 | -0.015   | -0.062 | -0.005 | -0.02  | 0.04   | 0.036  | 0.027  | -0.009 | -0.02  | -0.013 | -0.034 | -0.03  | 0.015  |
| MEAN Nucleus EosinODSum            | 0.083  | 0.031  | 0.009  | 0.004  | -0.087 | 0.214  | 0.084  | 0.711  | -0.061 | -0.06  | 0.033  | 0.011  | -0.266 | -0.055 | 0.004    | -0.053 | -0.051 | -0.001 | 0.045  | 0.035  | 0.037  | 0.002  | -0.027 | -0.034 | -0.034 | -0.059 | 0.017  |
| MEAN Nucleus EosinODStdDev         | -0.107 | -0.024 | -0.095 | -0.078 | 0.07   | 0.705  | 0      | 0.066  | 0.101  | 0.051  | 0.051  | 0.069  | 0.237  | 0.018  | 0.012    | -0.028 | 0.03   | -0.023 | 0.023  | 0.077  | -0.005 | 0.1    | 0.007  | 0.038  | -0.069 | 0.034  | -0.039 |
| MEAN Nucleus EosinODMin            | 0.031  | -0.083 | 0.114  | 0.02   | -0.016 | -0.038 | 0.082  | 0.781  | -0.046 | -0.043 | 0.09   | 0.034  | -0.058 | -0.106 | -0.011   | -0.054 | -0.002 | -0.009 | 0.011  | -0.004 | 0.014  | -0.059 | 0.004  | -0.011 | -0.012 | -0.04  | 0.033  |
| MEAN Nucleus EosinODRange          | -0.046 | -0.029 | -0.054 | -0.083 | 0.003  | 0.736  | 0.03   | 0.136  | 0.107  | 0.056  | 0.029  | 0.02   | 0.154  | 0.077  | -0.008   | -0.005 | 0.01   | 0.017  | 0.029  | 0.073  | -0.022 | 0.108  | -0.037 | 0.035  | -0.029 | 0.026  | -0.06  |
| MEAN Cell MaxCaliper               | -0.087 | 0.218  | -0.647 | 0.066  | -0.059 | -0.049 | 0.039  | 0.033  | -0.092 | 0.078  | 0.038  | 0.253  | -0.269 | -0.033 | -0.043   | 0.018  | 0.009  | 0.045  | 0.017  | 0.016  | 0.004  | 0.008  | -0.1   | 0.085  | 0.067  | -0.008 | 0.046  |
| MEAN Cell Eccentricity             | 0.334  | -0.347 | 0.308  | 0.06   | -0.433 | 0.067  | 0.067  | 0.094  | -0.113 | -0.084 | 0.017  | -0.173 | -0.191 | -0.056 | -0.034   | -0.068 | -0.005 | 0.185  | 0.065  | 0.008  | -0.066 | -0.035 | 0.017  | 0.021  | 0.025  | -0.008 | 0.017  |
| MEAN Cell HematoxylinODStdDev      | 0.274  | -0.044 | 0.116  | 0.087  | -0.137 | 0.504  | 0.043  | 0.058  | -0.008 | 0.012  | 0.002  | -0.031 | 0.072  | 0.503  | 0.106    | 0.061  | -0.02  | -0.031 | -0.059 | -0.052 | -0.086 | 0.083  | 0.002  | 0.046  | -0.012 | 0      | -0.025 |
| MEAN Cell EosinODMean              | 0.106  | -0.115 | 0.116  | 0.033  | -0.04  | 0.125  | 0.106  | 0.777  | -0.025 | 0.008  | 0.075  | 0.012  | -0.035 | 0.015  | 0.038    | -0.034 | 0.012  | 0.01   | -0.013 | 0.006  | -0.002 | 0.01   | 0.012  | -0.002 | 0.01   | 0.021  | -0.015 |
| MEAN Cell EosinODStdDev            | -0.118 | -0.117 | -0.07  | -0.104 | 0.016  | 0.644  | -0.016 | 0.319  | 0.067  | 0.056  | 0.061  | -0.028 | 0.033  | -0.166 | -0.026   | -0.058 | 0.055  | 0.16   | 0.044  | 0.09   | 0.018  | 0.067  | 0.052  | -0.046 | -0.003 | 0.114  | -0.031 |
| MEAN Cell EosinODMax               | 0.013  | -0.1   | 0.031  | -0.02  | 0.008  | 0.402  | 0.086  | 0.689  | 0.048  | 0.019  | 0.075  | -0.002 | 0.041  | -0.019 | 0.012    | -0.032 | 0.017  | 0.046  | -0.004 | 0.021  | -0.037 | 0.055  | 0.007  | 0.023  | 0.011  | 0.067  | -0.038 |
| MEAN Cytoplasm HematoxylinODMean   | 0.297  | -0.041 | 0.363  | 0.139  | -0.066 | 0.069  | 0.028  | -0.037 | 0.014  | 0.087  | -0.11  | 0.009  | -0.095 | 0.543  | 0.017    | 0.024  | 0.051  | 0.02   | 0.118  | 0.018  | 0.11   | -0.118 | -0.007 | -0.045 | 0.012  | 0.036  | 0.015  |
| MEAN Cytoplasm HematoxylinODStdDev | 0.252  | -0.122 | 0.259  | 0.073  | -0.103 | 0.435  | 0.073  | 0.287  | 0.044  | 0.001  | -0.048 | -0.136 | -0.035 | 0.367  | 0.098    | 0.036  | -0.004 | 0.192  | -0.047 | -0.06  | -0.004 | 0.011  | -0.016 | -0.003 | 0.029  | 0.062  | -0.056 |

| Pathomic feature name             | PF1    | PF2    | PF3    | PF4    | PF5    | PF6    | PF7    | PF8    | PF9    | PF10   | PF11   | PF12   | PF13   | PF14   | PF15   | PF16   | PF17   | PF18   | PF19   | PF20   | PF21   | PF22   | PF23   | PF24   | PF25   | PF26   | PF27   |
|-----------------------------------|--------|--------|--------|--------|--------|--------|--------|--------|--------|--------|--------|--------|--------|--------|--------|--------|--------|--------|--------|--------|--------|--------|--------|--------|--------|--------|--------|
| MEAN Cytoplasm HematoxylinODMax   | 0.281  | -0.066 | 0.197  | 0.103  | -0.113 | 0.422  | 0.05   | 0.023  | 0.022  | 0.034  | -0.091 | -0.043 | 0.009  | 0.569  | 0.037  | 0.074  | 0.003  | 0.083  | 0      | -0.027 | -0.038 | -0.009 | -0.017 | 0.019  | 0.018  | -0.013 | -0.018 |
| MEAN Cytoplasm HematoxylinODMin   | 0.096  | 0.044  | 0.113  | 0.112  | -0.018 | -0.179 | -0.092 | -0.554 | -0.062 | 0.019  | -0.086 | 0.138  | -0.026 | 0.334  | -0.045 | -0.006 | 0.018  | -0.183 | 0.118  | 0.031  | 0.065  | -0.151 | 0.042  | -0.016 | -0.074 | -0.1   | 0.1    |
| MEAN Cytoplasm EosinODStdDev      | -0.031 | -0.174 | -0.048 | -0.071 | -0.017 | 0.528  | 0.022  | 0.439  | 0.038  | 0.111  | 0.072  | -0.041 | -0.017 | -0.059 | 0.021  | -0.033 | 0.107  | 0.246  | -0.006 | 0.064  | 0.047  | 0.058  | 0.079  | -0.087 | 0.062  | 0.139  | -0.051 |
| MEAN Cytoplasm EosinODMin         | 0.162  | -0.082 | 0.175  | 0.097  | 0.005  | -0.082 | 0.157  | 0.727  | -0.04  | -0.043 | 0.046  | 0.072  | -0.022 | 0.068  | 0.037  | -0.032 | -0.009 | -0.072 | -0.049 | -0.029 | -0.07  | -0.04  | 0.033  | 0.041  | -0.04  | -0.021 | 0.039  |
| MEAN Nucleus CellAreaRatio        | 0.244  | -0.076 | 0.508  | 0.05   | -0.245 | -0.064 | 0.039  | 0.105  | -0.081 | -0.154 | -0.05  | -0.263 | -0.392 | -0.018 | 0.035  | -0.047 | -0.045 | 0.054  | -0.016 | -0.004 | -0.02  | -0.037 | 0.066  | -0.049 | -0.006 | -0.006 | -0.026 |
| MEAN Delaunay MaxTriangleArea     | -0.174 | 0.39   | -0.176 | 0.131  | 0.599  | -0.102 | -0.028 | -0.107 | 0.1    | -0.001 | 0.027  | 0.141  | 0.046  | -0.017 | 0.056  | 0.008  | 0.035  | -0.038 | -0.134 | -0.006 | 0.072  | -0.029 | -0.042 | -0.032 | -0.009 | 0.063  | 0.04   |
| MEAN ODSum Std dev                | 0.09   | -0.004 | 0      | -0.041 | -0.117 | 0.753  | -0.022 | 0.077  | 0.004  | -0.056 | 0.044  | -0.031 | -0.074 | 0.186  | 0.027  | 0.028  | -0.015 | 0.005  | 0.038  | 0.019  | 0.018  | 0.015  | 0.012  | -0.024 | -0.07  | -0.037 | 0.002  |
| MEAN ODSum Min                    | 0.204  | -0.091 | 0.26   | 0.115  | -0.04  | -0.058 | 0.123  | 0.697  | -0.014 | 0.026  | 0.027  | 0.016  | -0.027 | 0.174  | 0.03   | -0.029 | 0.007  | -0.054 | -0.001 | -0.002 | 0.002  | -0.014 | -0.002 | 0.012  | 0.017  | 0.029  | -0.001 |
| MEAN ODSum Max                    | 0.18   | -0.045 | 0.138  | 0.056  | -0.098 | 0.428  | 0.081  | 0.586  | 0.006  | 0.007  | 0.057  | 0.022  | -0.046 | 0.263  | 0.041  | 0.01   | -0.003 | -0.055 | 0.024  | 0.006  | 0.019  | 0.012  | -0.024 | 0.002  | -0.014 | 0.006  | -0.012 |
| MEAN ODSum Haralick ASM F0        | -0.006 | -0.026 | 0.261  | 0.037  | 0.383  | -0.55  | -0.013 | -0.096 | 0.132  | 0.159  | -0.041 | -0.101 | 0.132  | -0.005 | -0.025 | 0.003  | 0.007  | 0.039  | 0.069  | 0.082  | 0.022  | 0.207  | 0.065  | -0.008 | -0.098 | 0.062  | -0.057 |
| MEAN ODSum HaralickCorrelation F2 | -0.095 | 0.159  | -0.595 | -0.036 | -0.09  | 0.165  | 0.028  | 0.038  | -0.194 | -0.024 | -0.035 | 0.204  | -0.303 | 0.009  | 0.077  | -0.04  | 0.018  | -0.016 | 0.074  | -0.038 | -0.021 | -0.106 | 0.102  | 0.024  | -0.043 | -0.082 | 0.148  |
| MEAN ODSum Haralick IDM           | -0.14  | 0.07   | -0.195 | 0.024  | 0.232  | -0.685 | 0.034  | -0.147 | 0.045  | 0.162  | -0.031 | 0.073  | 0.022  | -0.093 | -0.042 | 0      | 0.02   | -0.025 | 0.018  | 0.042  | -0.035 | 0.079  | -0.003 | 0.031  | 0      | 0.039  | -0.035 |
| MEAN ODSum HaralickSumAverage F5  | 0.216  | -0.103 | 0.232  | 0.083  | -0.083 | 0.176  | 0.103  | 0.675  | -0.02  | 0.015  | 0.037  | 0.003  | -0.071 | 0.219  | 0.054  | -0.02  | 0.01   | -0.008 | 0.013  | -0.007 | 0.024  | -0.016 | 0.006  | -0.009 | 0.009  | 0.028  | -0.006 |
| MEAN ODSum Haralick DV F9         | -0.008 | -0.14  | 0.147  | 0.024  | 0.147  | -0.72  | 0.04   | -0.096 | 0.042  | 0.15   | -0.05  | -0.078 | -0.049 | -0.04  | 0.009  | -0.031 | 0.049  | 0.104  | 0.054  | 0.029  | -0.034 | 0.061  | 0.06   | 0.024  | -0.025 | 0.058  | -0.049 |
| MEAN ODSum Haralick IMOC1 F11     | -0.194 | 0.13   | -0.336 | 0.017  | 0.187  | -0.598 | 0.033  | -0.112 | 0.054  | 0.172  | -0.012 | 0.141  | 0.046  | -0.093 | -0.056 | 0.022  | 0.008  | -0.064 | -0.002 | 0.034  | -0.023 | 0.082  | -0.067 | 0.03   | 0.04   | 0.039  | -0.04  |
| MEAN ODSum Haralick IMOC2 F12     | 0.105  | -0.027 | 0.072  | -0.012 | -0.301 | 0.625  | -0.02  | 0.101  | -0.127 | -0.251 | 0.024  | -0.038 | -0.092 | -0.006 | 0.034  | -0.016 | -0.012 | -0.018 | -0.076 | -0.097 | -0.004 | -0.217 | 0.008  | -0.016 | 0.043  | -0.066 | 0.074  |
| CD50um firstorder 10Percentile    | 0.162  | -0.114 | 0.53   | -0.391 | -0.111 | 0.014  | 0.025  | -0.014 | 0.015  | -0.221 | 0.011  | -0.362 | -0.052 | 0.003  | -0.007 | -0.014 | -0.021 | 0.053  | 0.005  | -0.007 | -0.022 | -0.008 | 0.063  | 0.011  | -0.007 | 0.041  | -0.017 |
| CD50um firstorder Kurtosis        | -0.034 | 0.266  | -0.277 | 0.055  | 0.483  | -0.107 | -0.003 | -0.168 | 0.036  | -0.034 | 0.077  | 0.185  | 0.104  | 0.065  | -0.065 | 0.366  | 0.002  | 0.045  | 0.048  | -0.077 | -0.051 | -0.179 | -0.076 | 0.014  | -0.001 | 0.039  | 0.056  |
| CD50um firstorder Maximum         | 0.45   | -0.198 | 0.574  | -0.073 | -0.167 | -0.028 | 0.111  | 0.028  | -0.002 | 0.108  | 0.023  | -0.11  | -0.065 | 0.027  | 0.015  | -0.017 | -0.039 | 0.049  | 0.059  | 0.046  | -0.054 | 0.039  | 0.027  | -0.04  | 0.074  | 0.019  | 0.05   |
| CD50um firstorder Minimum         | -0.086 | -0.046 | 0.284  | -0.116 | -0.028 | 0.06   | -0.165 | -0.03  | 0.035  | -0.157 | -0.011 | -0.608 | -0.188 | -0.041 | -0.004 | 0.106  | -0.074 | 0.016  | -0.025 | -0.048 | 0.053  | 0.054  | 0.088  | 0.047  | 0.154  | 0.032  | -0.094 |
| CD50um firstorder Range           | 0.496  | -0.187 | 0.482  | -0.031 | -0.162 | -0.052 | 0.177  | 0.041  | -0.015 | 0.17   | 0.027  | 0.12   | 0.006  | 0.044  | 0.017  | -0.059 | 0.068  | 0.044  | 0.071  | 0.066  | -0.075 | 0.019  | -0.006 | -0.059 | 0.015  | 0.008  | 0.087  |
| CD50um firstorder Skewness        | -0.146 | 0.149  | -0.47  | -0.22  | 0.334  | -0.124 | -0.066 | -0.063 | 0.035  | 0.35   | 0.038  | 0.119  | -0.007 | -0.037 | -0.084 | 0.198  | 0.013  | 0.004  | 0.06   | 0.003  | -0.001 | -0.005 | -0.063 | 0.039  | 0.131  | 0.027  | 0.063  |
| CD50um glcm ClusterProminence     | 0.087  | -0.202 | 0.259  | 0.679  | -0.014 | -0.049 | -0.03  | 0.08   | 0.004  | 0.19   | -0.034 | 0.084  | 0.117  | 0.056  | 0.018  | 0.037  | 0.007  | 0.032  | 0.087  | 0.016  | 0.023  | 0.096  | 0.006  | -0.082 | -0.072 | -0.025 | -0.018 |
| CD50um glcm Correlation           | 0.425  | -0.108 | 0.239  | 0.244  | 0.039  | -0.096 | 0.026  | -0.044 | -0.033 | 0.54   | -0.116 | 0.086  | 0.039  | 0.055  | 0.054  | -0.157 | -0.057 | 0.044  | -0.049 | -0.013 | -0.015 | -0.029 | -0.035 | -0.038 | 0      | -0.009 | -0.03  |
| CD50um glcm DifferenceAverage     | 0.126  | -0.587 | 0.35   | -0.142 | -0.147 | 0.032  | 0.028  | 0.155  | 0.031  | -0.094 | 0.011  | 0.004  | -0.061 | 0.031  | -0.069 | -0.026 | 0.134  | 0.085  | 0.083  | 0.188  | -0.086 | 0.039  | 0.111  | -0.04  | -0.101 | 0.024  | 0.045  |
| CD50um glcm JointEnergy           | -0.321 | 0.333  | -0.102 | 0.486  | 0.392  | -0.027 | -0.054 | -0.069 | 0.062  | -0.077 | 0.002  | 0.07   | 0.101  | -0.023 | 0.059  | 0.069  | 0.007  | -0.068 | -0.083 | -0.059 | 0.081  | -0.042 | -0.019 | -0.07  | -0.016 | 0.015  | 0.026  |
| CD50um glcm Imc2                  | -0.243 | -0.44  | 0.131  | 0.141  | 0.026  | -0.087 | -0.051 | -0.019 | 0.037  | 0.525  | -0.112 | 0.111  | 0.101  | 0.054  | 0.049  | -0.14  | 0.028  | 0.069  | -0.081 | -0.039 | -0.029 | -0.122 | 0.028  | -0.041 | -0.002 | -0.026 | -0.044 |
| CD50um glcm Idm                   | -0.169 | 0.484  | -0.177 | 0.388  | 0.348  | -0.015 | -0.06  | -0.113 | 0.061  | 0.105  | 0.028  | 0.085  | 0.124  | -0.011 | 0.045  | 0.022  | -0.044 | -0.066 | -0.079 | -0.143 | 0.098  | -0.078 | -0.065 | -0.016 | 0.028  | -0.033 | -0.006 |
| CD50um glcm Idn                   | 0.632  | 0.186  | 0.226  | 0.098  | 0.043  | -0.115 | 0.149  | -0.111 | -0.035 | 0.245  | 0.029  | 0.124  | 0.044  | 0.044  | 0.059  | -0.043 | -0.029 | -0.036 | 0.004  | -0.027 | -0.057 | -0.042 | -0.066 | -0.042 | 0.055  | -0.02  | 0.097  |
| CD50um glcm InverseVariance       | -0.164 | 0.54   | -0.313 | -0.055 | 0.263  | 0.007  | -0.063 | -0.163 | 0.015  | 0.091  | -0.023 | 0.082  | 0.13   | 0.011  | -0.013 | 0.046  | -0.099 | -0.078 | -0.097 | -0.159 | 0.147  | -0.059 | -0.092 | 0.109  | 0.089  | -0.092 | -0.022 |
| CD50um glcm MaximumProbability    | -0.168 | 0.155  | 0.002  | 0.69   | 0.32   | -0.052 | -0.042 | -0.047 | 0.06   | -0.029 | -0.031 | 0.064  | 0.072  | -0.012 | 0.081  | 0.046  | 0.007  | -0.051 | -0.036 | -0.04  | 0.029  | -0.059 | -0.003 | -0.108 | -0.038 | 0.007  | 0.032  |

| Pathomic feature name           | PF1    | PF2    | PF3    | PF4    | PF5    | PF6    | PF7    | PF8    | PF9    | PF10   | PF11   | PF12   | PF13   | PF14   | PF15   | PF16   | PF17   | PF18   | PF19   | PF20   | PF21   | PF22   | PF23   | PF24   | PF25   | PF26   | PF27   |
|---------------------------------|--------|--------|--------|--------|--------|--------|--------|--------|--------|--------|--------|--------|--------|--------|--------|--------|--------|--------|--------|--------|--------|--------|--------|--------|--------|--------|--------|
| CD50um glrlm RunVariance        | 0.033  | -0.049 | 0.127  | 0.802  | -0.029 | 0.024  | -0.015 | 0.043  | -0.001 | 0.003  | -0.02  | 0.018  | 0.06   | 0.013  | 0.033  | 0.038  | -0.02  | -0.044 | 0.009  | -0.035 | 0.006  | -0.009 | -0.015 | -0.074 | -0.038 | -0.028 | 0.011  |
| CD50um glszm SALGLE             | -0.468 | 0.406  | -0.186 | 0.083  | 0.397  | -0.043 | -0.097 | -0.026 | 0.146  | -0.004 | 0.044  | 0.1    | 0.056  | -0.039 | 0.011  | 0.056  | 0.045  | -0.024 | -0.132 | -0.03  | 0.143  | 0.001  | -0.027 | 0.03   | 0.03   | 0.061  | -0.002 |
| CD50um glldm LDLGLE             | -0.049 | -0.021 | 0.112  | 0.804  | 0.03   | 0.019  | -0.024 | 0.041  | -0.003 | -0.003 | -0.025 | -0.036 | 0.063  | 0.003  | 0.034  | 0.046  | -0.009 | -0.042 | -0.005 | -0.029 | 0.022  | -0.01  | -0.011 | -0.073 | -0.032 | -0.024 | 0.011  |
| CD50um ngtdm Busyness           | 0.208  | 0.41   | 0.079  | -0.04  | -0.075 | 0.029  | 0.625  | 0.107  | -0.049 | -0.085 | 0.043  | 0.065  | -0.102 | 0.003  | 0.001  | -0.019 | -0.006 | -0.017 | 0.038  | 0.066  | -0.02  | 0.095  | -0.039 | 0.04   | -0.013 | -0.03  | 0.032  |
| CD50um ngtdm Complexity         | 0.377  | -0.218 | 0.56   | -0.039 | -0.08  | -0.017 | 0.199  | 0.145  | -0.011 | 0.089  | 0.04   | 0.17   | 0.046  | 0.083  | -0.052 | -0.013 | 0.114  | 0.039  | 0.03   | 0.086  | -0.024 | 0.023  | 0.005  | -0.018 | -0.084 | 0.028  | 0.087  |
| CD50um ngtdm Contrast           | -0.32  | -0.523 | 0.194  | 0.339  | -0.123 | 0.051  | -0.137 | 0.12   | 0.089  | 0.153  | -0.062 | -0.039 | 0.022  | 0.01   | 0.019  | -0.085 | 0.103  | 0.042  | 0.022  | 0.103  | 0.004  | 0.043  | 0.095  | -0.065 | -0.055 | -0.031 | -0.078 |
| CD100um firstorder Kurtosis     | 0.159  | 0.251  | -0.18  | 0.051  | 0.327  | 0.013  | 0.021  | -0.144 | 0.042  | -0.05  | -0.01  | 0.026  | 0.042  | 0.059  | -0.053 | 0.628  | -0.017 | 0.049  | 0.071  | -0.019 | -0.02  | -0.058 | -0.016 | -0.009 | -0.002 | 0.04   | 0      |
| CD100um firstorder Maximum      | 0.446  | -0.202 | 0.56   | -0.034 | -0.162 | -0.012 | 0.114  | 0.057  | 0.002  | 0.114  | -0.057 | -0.184 | -0.043 | 0.081  | 0.034  | 0.098  | 0      | 0.073  | -0.001 | 0.049  | 0.002  | 0.023  | 0.004  | -0.009 | -0.03  | 0.046  | 0.064  |
| CD100um firstorder Minimum      | 0.006  | -0.094 | 0.081  | -0.224 | -0.124 | -0.022 | -0.127 | -0.077 | 0.084  | -0.161 | -0.019 | -0.675 | -0.004 | 0.097  | 0.034  | -0.006 | 0.017  | -0.026 | 0.002  | 0.062  | -0.053 | 0.112  | -0.068 | -0.029 | 0.083  | -0.021 | 0.116  |
| CD100um firstorder Range        | 0.457  | -0.162 | 0.538  | 0.073  | -0.107 | -0.001 | 0.179  | 0.096  | -0.038 | 0.195  | -0.051 | 0.14   | -0.043 | 0.036  | 0.019  | 0.103  | -0.009 | 0.088  | -0.001 | 0.019  | 0.029  | -0.031 | 0.038  | 0.006  | -0.072 | 0.058  | 0.008  |
| CD100um firstorder Uniformity   | -0.382 | 0.412  | -0.287 | 0.115  | 0.433  | -0.076 | -0.049 | -0.085 | 0.085  | -0.151 | 0.031  | 0.053  | 0.077  | -0.035 | 0.037  | 0.13   | 0.01   | -0.044 | -0.024 | -0.005 | 0.05   | -0.002 | -0.019 | -0.051 | -0.001 | 0.036  | 0.024  |
| CD100um glcm Correlation        | 0.459  | 0.156  | 0.184  | 0.181  | 0.116  | -0.174 | 0.076  | -0.026 | -0.209 | 0.418  | -0.164 | -0.011 | -0.048 | 0.004  | 0.001  | -0.212 | -0.096 | 0.012  | -0.068 | -0.011 | -0.086 | 0.06   | -0.029 | 0.006  | 0.003  | 0.056  | 0.029  |
| CD100um glcm DifferenceAverage  | -0.074 | -0.656 | 0.334  | 0.022  | -0.061 | 0.143  | -0.025 | 0.026  | 0.101  | 0.046  | 0.043  | 0.112  | -0.009 | 0.07   | -0.013 | -0.042 | 0.161  | 0.049  | 0.007  | 0.135  | 0.031  | -0.069 | 0.097  | -0.056 | -0.107 | -0.021 | -0.002 |
| CD100um glcm DifferenceEntropy  | 0.2    | -0.664 | 0.326  | 0.022  | -0.168 | 0.108  | -0.001 | 0.036  | 0.054  | 0.05   | 0.022  | 0.067  | -0.06  | 0.062  | -0.02  | -0.023 | 0.065  | 0.083  | 0.059  | 0.091  | -0.008 | -0.067 | 0.037  | -0.025 | -0.062 | -0.034 | -0.046 |
| CD100um glcm DifferenceVariance | 0.001  | -0.545 | 0.401  | 0.293  | 0.104  | 0.084  | -0.053 | 0.048  | 0.075  | 0.098  | 0.009  | -0.105 | 0.066  | 0.098  | -0.097 | 0.031  | -0.142 | 0.013  | 0.028  | 0.135  | 0.02   | -0.047 | 0.089  | -0.005 | -0.115 | -0.054 | 0.007  |
| CD100um glcm Imc2               | -0.318 | -0.459 | 0.067  | 0.067  | 0.067  | -0.106 | -0.198 | 0.02   | 0.113  | 0.36   | -0.137 | -0.016 | 0.133  | 0.028  | -0.013 | -0.137 | 0.03   | 0.064  | -0.168 | -0.119 | 0.024  | -0.172 | 0.072  | 0.052  | 0.055  | 0.007  | -0.054 |
| CD100um glcm Idm                | 0.091  | 0.493  | -0.206 | 0.294  | 0.424  | -0.149 | 0.001  | -0.1   | 0.04   | -0.038 | -0.069 | -0.016 | 0.061  | 0.007  | -0.093 | 0.032  | -0.144 | -0.016 | -0.067 | -0.035 | -0.095 | -0.025 | -0.092 | 0.072  | 0.038  | -0.04  | 0.067  |
| CD100um glcm Idn                | 0.658  | 0.256  | 0.2    | 0.059  | 0.131  | -0.112 | 0.12   | 0.009  | -0.128 | 0.12   | -0.13  | 0.009  | -0.086 | 0.008  | -0.027 | 0.108  | -0.104 | 0      | -0.024 | 0.012  | -0.075 | 0.001  | -0.004 | 0.041  | -0.011 | 0.087  | 0.056  |
| CD100um glcm InverseVariance    | -0.077 | 0.642  | -0.17  | 0.036  | 0.383  | -0.089 | 0.001  | -0.038 | -0.054 | -0.059 | -0.106 | -0.045 | 0.044  | -0.047 | 0.017  | 0.11   | -0.018 | -0.127 | -0.081 | -0.057 | 0.033  | 0.035  | -0.042 | 0.022  | 0.04   | 0.05   | -0.048 |
| CD100um glcm MaximumProbability | -0.332 | 0.069  | -0.061 | 0.691  | 0.159  | -0.118 | -0.069 | -0.03  | 0.046  | -0.009 | -0.041 | 0.1    | 0.013  | 0.026  | -0.042 | 0.023  | 0.054  | 0.099  | -0.012 | 0.053  | 0.022  | 0.006  | -0.027 | 0.077  | 0.017  | -0.01  | -0.035 |
| CD100um glcm SumEntropy         | 0.51   | -0.228 | 0.435  | -0.004 | -0.174 | -0.046 | 0.057  | 0.079  | -0.086 | 0.28   | -0.09  | 0.024  | -0.028 | 0.019  | -0.007 | -0.184 | -0.026 | 0.044  | -0.059 | 0.008  | -0.049 | 0.008  | 0.005  | 0.017  | -0.007 | 0.034  | -0.005 |
| CD100um glrlm RunVariance       | 0.125  | 0.052  | -0.039 | 0.656  | -0.02  | -0.141 | -0.018 | -0.043 | 0.022  | 0.005  | 0.048  | 0.111  | -0.108 | 0.083  | -0.061 | -0.059 | 0.043  | 0.207  | -0.041 | 0.073  | -0.016 | 0.001  | -0.033 | 0.312  | 0.051  | -0.029 | 0.036  |
| CD100um glldm LDLGLE            | -0.071 | -0.037 | 0.017  | 0.785  | -0.053 | -0.049 | -0.033 | -0.005 | 0.045  | 0.005  | 0.021  | 0.088  | -0.02  | 0.053  | -0.01  | -0.003 | 0.017  | 0.11   | -0.042 | 0.02   | 0.023  | 0.002  | -0.034 | 0.144  | 0.029  | -0.036 | 0.048  |
| CD100um glldm SDHGLE            | 0.235  | -0.148 | 0.661  | 0.143  | -0.088 | 0.045  | 0.092  | 0.068  | -0.013 | -0.069 | -0.015 | 0.186  | 0.005  | -0.034 | -0.006 | -0.017 | -0.087 | 0.086  | -0.068 | -0.057 | 0.035  | -0.085 | 0.089  | -0.027 | -0.111 | 0.069  | -0.118 |
| CD100um glldm SDLGLE            | -0.677 | 0.098  | -0.183 | 0.112  | -0.008 | 0.045  | -0.08  | -0.04  | 0.234  | 0.029  | -0.012 | 0.045  | 0.149  | -0.008 | -0.003 | 0.096  | -0.062 | 0.106  | -0.051 | -0.065 | 0.061  | 0.022  | -0.081 | 0.023  | 0.075  | -0.067 | 0.153  |
| CD100um ngtdm Busyness          | 0.156  | 0.503  | -0.13  | -0.043 | 0.013  | 0.016  | 0.482  | 0.082  | -0.044 | -0.105 | 0.124  | 0.08   | -0.068 | -0.004 | -0.022 | 0.031  | 0.013  | -0.063 | 0.034  | 0.124  | -0.041 | 0.144  | -0.148 | 0.028  | -0.031 | -0.098 | 0.087  |
| CD100um ngtdm Complexity        | 0.274  | -0.23  | 0.582  | 0.248  | -0.042 | 0.037  | 0.19   | 0.086  | 0.002  | 0.172  | 0.004  | 0.175  | 0.054  | 0.062  | -0.024 | -0.001 | 0.029  | 0.085  | 0.033  | 0.075  | 0.065  | 0.03   | -0.009 | -0.06  | -0.091 | 0.026  | -0.068 |
| CD100um ngtdm Contrast          | -0.47  | -0.533 | 0.113  | 0.123  | -0.009 | 0.082  | -0.087 | -0.016 | 0.106  | 0.179  | -0.015 | 0.041  | 0.046  | 0.032  | 0.018  | -0.08  | 0.161  | 0.03   | -0.022 | 0.112  | 0      | -0.002 | 0.139  | -0.054 | -0.074 | -0.087 | 0.074  |
| CD100um ngtdm Strength          | -0.263 | -0.485 | 0.046  | 0.084  | 0.221  | -0.123 | -0.095 | -0.03  | -0.066 | 0.385  | -0.148 | -0.01  | 0.055  | 0.082  | -0.021 | 0.032  | 0.031  | 0.087  | 0.146  | 0.149  | 0.015  | 0.128  | 0.101  | -0.071 | -0.097 | 0.08   | 0.02   |

| Pathomic feature name                 | PF1    | PF2    | PF3    | PF4    | PF5    | PF6    | PF7    | PF8    | PF9    | PF10   | PF11   | PF12   | PF13   | PF14   | PF15   | PF16   | PF17   | PF18   | PF19   | PF20   | PF21   | PF22   | PF23   | PF24   | PF25   | PF26   | PF27   |
|---------------------------------------|--------|--------|--------|--------|--------|--------|--------|--------|--------|--------|--------|--------|--------|--------|--------|--------|--------|--------|--------|--------|--------|--------|--------|--------|--------|--------|--------|
| CD150um firstorder InterquartileRange | 0.093  | -0.366 | 0.484  | 0.043  | -0.07  | -0.069 | -0.062 | 0.057  | -0.062 | 0.308  | -0.111 | 0.133  | 0.033  | 0.029  | 0.02   | -0.301 | 0.048  | -0.079 | -0.135 | 0.019  | -0.074 | -0.007 | 0.007  | 0.017  | -0.023 | -0.029 | 0.033  |
| CD150um firstorder Kurtosis           | 0.187  | 0.13   | -0.166 | 0.006  | 0.097  | 0.025  | 0.016  | -0.14  | -0.074 | -0.025 | 0.07   | 0.006  | 0.03   | 0.081  | 0.014  | 0.698  | 0.027  | -0.036 | 0.055  | 0.008  | 0.008  | 0.025  | 0.043  | -0.003 | -0.024 | -0.03  | -0.014 |
| CD150um firstorder Minimum            | 0.051  | -0.078 | 0.146  | -0.285 | -0.128 | 0.046  | -0.126 | -0.07  | 0.059  | -0.085 | 0.001  | -0.656 | -0.01  | -0.088 | 0.038  | -0.136 | -0.006 | 0.021  | 0.043  | 0.125  | -0.013 | 0.084  | -0.044 | -0.027 | -0.084 | 0.025  | 0.005  |
| CD150um firstorder Range              | 0.438  | -0.156 | 0.555  | 0.088  | -0.142 | -0.038 | 0.161  | 0.061  | -0.073 | 0.175  | -0.007 | 0.133  | -0.017 | 0.124  | 0.006  | 0.135  | 0.016  | 0.006  | -0.037 | 0.001  | 0.029  | 0.002  | 0.028  | -0.017 | -0.016 | 0.022  | 0.016  |
| CD150um firstorder Skewness           | -0.039 | 0.041  | -0.41  | -0.163 | 0.28   | -0.094 | -0.003 | -0.082 | -0.056 | 0.498  | 0.037  | 0.187  | 0.039  | 0.052  | -0.102 | 0.2    | 0.057  | -0.091 | 0.05   | 0.021  | 0.011  | -0.048 | -0.093 | -0.017 | -0.005 | 0.012  | 0.034  |
| CD150um firstorder Uniformity         | -0.584 | 0.233  | -0.352 | 0.096  | 0.243  | 0.009  | -0.059 | -0.087 | 0.156  | -0.108 | 0.06   | 0.036  | 0.107  | -0.034 | 0.004  | 0.136  | 0.016  | 0.021  | -0.015 | -0.015 | 0.07   | -0.016 | 0.009  | -0.048 | 0.013  | -0.024 | 0.043  |
| CD150um glm JointAverage              | 0.311  | -0.132 | 0.662  | 0.102  | -0.156 | 0.004  | 0.125  | 0.072  | -0.012 | -0.134 | -0.041 | 0.049  | -0.023 | 0.082  | 0.024  | 0.024  | -0.058 | 0.047  | -0.075 | -0.092 | -0.011 | -0.05  | 0.094  | -0.037 | 0.025  | 0.037  | -0.036 |
| CD150um glm ClusterShade              | -0.014 | 0.039  | -0.139 | -0.711 | 0.13   | -0.136 | 0.005  | -0.019 | 0.04   | 0.245  | 0.01   | -0.024 | 0.006  | 0.02   | -0.043 | -0.02  | 0.026  | 0.062  | 0.103  | 0.06   | 0.069  | 0.164  | 0.015  | 0.046  | 0.026  | 0.03   | -0.043 |
| CD150um glm Correlation               | 0.516  | 0.196  | 0.139  | 0.127  | 0.077  | -0.153 | 0.103  | -0.1   | -0.104 | 0.321  | -0.257 | 0.01   | -0.007 | 0.029  | -0.048 | -0.187 | -0.054 | 0.054  | -0.099 | 0.057  | -0.131 | 0.067  | 0.002  | 0.024  | -0.02  | 0.031  | 0.149  |
| CD150um glm DifferenceEntropy         | 0.513  | -0.418 | 0.41   | 0.1    | -0.102 | 0.044  | -0.037 | 0.092  | 0.018  | 0.001  | 0.058  | 0.107  | -0.01  | 0.036  | -0.004 | -0.053 | 0.044  | 0.005  | 0.053  | 0.004  | 0.059  | -0.054 | -0.038 | -0.016 | -0.019 | 0.01   | -0.102 |
| CD150um glm DifferenceVariance        | 0.019  | -0.501 | 0.447  | 0.368  | 0.1    | -0.02  | -0.087 | 0.081  | 0.082  | 0.064  | 0.004  | 0.069  | 0.021  | 0.089  | -0.024 | 0.044  | 0.063  | -0.075 | 0.084  | 0.041  | 0.02   | -0.012 | 0.056  | 0.021  | -0.099 | -0.054 | -0.083 |
| CD150um glm JointEnergy               | -0.794 | -0.046 | -0.103 | 0.072  | -0.087 | 0.032  | -0.056 | 0.005  | 0.071  | 0.034  | -0.004 | 0.037  | 0.052  | -0.041 | 0.035  | 0.011  | 0.053  | 0.061  | 0.003  | -0.024 | 0.063  | 0.002  | 0.012  | 0.009  | 0.022  | -0.015 | 0.022  |
| CD150um glm Idm                       | 0.228  | 0.577  | -0.138 | 0.225  | 0.238  | -0.094 | -0.006 | 0.061  | 0.145  | 0.034  | -0.162 | -0.085 | 0.023  | -0.069 | -0.088 | 0.062  | -0.097 | -0.013 | 0.08   | 0.03   | -0.053 | 0.102  | 0.018  | 0.148  | 0.047  | -0.043 | -0.067 |
| CD150um glm Idmn                      | 0.732  | 0.242  | 0.104  | -0.017 | 0.029  | -0.05  | 0.088  | -0.048 | -0.013 | 0.081  | -0.054 | 0.006  | -0.048 | 0.065  | -0.012 | 0.115  | -0.05  | -0.001 | -0.043 | 0.055  | -0.068 | 0.029  | 0.033  | -0.007 | -0.007 | 0.052  | 0.137  |
| CD150um glm InverseVariance           | 0.07   | 0.617  | -0.235 | -0.019 | 0.258  | 0.026  | 0.001  | 0.058  | 0.101  | -0.054 | -0.13  | -0.097 | 0.138  | -0.082 | -0.18  | 0.033  | -0.108 | 0.011  | 0.027  | 0.012  | -0.044 | 0.05   | -0.042 | 0.077  | 0.073  | -0.035 | -0.075 |
| CD150um glm MaximumProbability        | -0.39  | -0.135 | -0.103 | 0.644  | 0.007  | -0.06  | -0.083 | 0.017  | 0.138  | 0.046  | 0.016  | 0.089  | -0.004 | -0.018 | 0.024  | -0.005 | 0.083  | 0.107  | -0.018 | 0.056  | 0.026  | -0.027 | -0.007 | 0.131  | 0.024  | -0.038 | 0.038  |
| CD150um glszm LALGLE                  | -0.092 | -0.036 | -0.054 | 0.68   | -0.006 | -0.118 | -0.029 | -0.058 | 0.015  | 0.008  | 0.026  | 0.119  | -0.111 | 0.083  | -0.028 | -0.079 | 0.058  | 0.193  | -0.068 | 0.078  | 0.024  | 0.019  | -0.033 | 0.277  | 0.055  | -0.008 | 0.032  |
| CD150um gldm DependenceVariance       | 0.337  | 0.277  | 0.05   | 0.566  | 0.005  | -0.139 | -0.001 | 0.055  | 0.09   | 0.086  | -0.077 | 0.009  | -0.141 | -0.007 | 0.006  | 0.048  | 0.001  | 0.038  | 0.098  | 0.038  | -0.042 | 0.068  | 0.072  | 0.222  | 0.021  | -0.051 | -0.038 |
| CD150um ngtdm Busyness                | -0.156 | 0.541  | -0.21  | 0.038  | 0.304  | 0.02   | 0.27   | -0.001 | 0.036  | -0.058 | 0.164  | 0.164  | 0.028  | -0.057 | -0.022 | -0.003 | 0.02   | -0.11  | -0.017 | 0.106  | 0.011  | 0.077  | -0.163 | -0.019 | -0.048 | 0.004  | 0.025  |
| CD150um ngtdm Strength                | -0.177 | -0.54  | 0.137  | 0.117  | 0.145  | -0.126 | -0.155 | -0.038 | 0.044  | 0.365  | -0.179 | -0.032 | 0.052  | 0.115  | 0.061  | 0.004  | 0.006  | 0.045  | 0.069  | 0.053  | -0.032 | 0.069  | 0.131  | -0.041 | -0.073 | 0.074  | 0.12   |
| CD200um firstorder Kurtosis           | 0.261  | 0.156  | -0.099 | 0.034  | 0.154  | 0.076  | 0.073  | -0.108 | -0.032 | -0.007 | 0.089  | 0.028  | -0.016 | 0.036  | 0.064  | 0.513  | 0.006  | 0.062  | 0.457  | -0.041 | -0.018 | 0.006  | -0.018 | -0.009 | 0.01   | -0.016 | 0.047  |
| CD200um firstorder Minimum            | 0.06   | -0.128 | 0.232  | -0.307 | -0.098 | -0.022 | -0.133 | -0.011 | -0.008 | 0.007  | -0.068 | -0.587 | 0.035  | 0.004  | 0.015  | 0.01   | -0.044 | 0.112  | -0.071 | 0.117  | 0.044  | -0.147 | -0.002 | -0.013 | -0.179 | 0.045  | -0.01  |
| CD200um firstorder Range              | 0.446  | -0.105 | 0.553  | 0.145  | -0.181 | -0.013 | 0.188  | 0.051  | -0.015 | 0.143  | -0.019 | 0.074  | -0.036 | 0.097  | 0.029  | -0.003 | -0.011 | 0.006  | 0.065  | -0.042 | 0.009  | 0.093  | -0.009 | -0.026 | 0.065  | 0.002  | 0.018  |
| CD200um firstorder RMAD               | 0.134  | -0.36  | 0.497  | 0.148  | -0.124 | -0.02  | -0.079 | 0.036  | 0      | 0.246  | -0.094 | 0.036  | 0.005  | 0.047  | 0.01   | -0.273 | 0.05   | -0.112 | -0.114 | 0.057  | 0.001  | -0.023 | 0.032  | -0.07  | 0.185  | 0.02   | -0.008 |
| CD200um firstorder Skewness           | -0.143 | 0.024  | -0.324 | -0.155 | 0.244  | -0.067 | -0.036 | -0.041 | 0.018  | 0.598  | -0.011 | 0.194  | 0.076  | 0.054  | -0.074 | 0.109  | 0.056  | 0.012  | 0.063  | -0.008 | 0.041  | -0.109 | -0.068 | 0.013  | -0.038 | -0.004 | 0.045  |
| CD200um firstorder TotalEnergy        | 0.179  | 0.209  | 0.318  | -0.053 | -0.106 | 0.004  | 0.675  | 0.079  | -0.036 | -0.055 | -0.004 | -0.045 | 0.019  | -0.029 | 0.028  | -0.018 | -0.034 | 0.085  | 0.005  | -0.037 | -0.01  | 0.01   | -0.033 | -0.022 | 0.019  | -0.035 | -0.001 |
| CD200um firstorder Uniformity         | -0.73  | 0.126  | -0.231 | 0.041  | 0.154  | 0.011  | -0.057 | -0.06  | 0.059  | -0.039 | 0.014  | 0.045  | 0.056  | -0.029 | 0.096  | 0.087  | 0.083  | 0.001  | 0.001  | 0.006  | 0.078  | -0.016 | 0.054  | -0.057 | -0.005 | 0.024  | 0.043  |
| CD200um glm JointAverage              | 0.334  | -0.073 | 0.615  | 0.134  | -0.177 | 0.042  | 0.146  | 0.035  | 0.008  | -0.207 | -0.022 | 0.03   | -0.062 | 0.026  | 0.041  | -0.079 | -0.049 | -0.017 | 0.003  | -0.107 | -0.084 | 0.108  | 0.049  | -0.03  | 0.067  | 0.023  | -0.03  |
| CD200um glm ClusterProminence         | 0.089  | -0.155 | 0.246  | 0.652  | -0.02  | -0.12  | -0.027 | 0.06   | 0.015  | 0.147  | -0.032 | 0.032  | 0.103  | 0.093  | 0.031  | 0.035  | -0.025 | -0.003 | 0.173  | 0.03   | 0.059  | 0.185  | 0.017  | -0.113 | 0.111  | 0.001  | 0.011  |
| CD200um glm ClusterShade              | -0.04  | 0.005  | -0.124 | -0.648 | 0.151  | -0.15  | -0.001 | 0.022  | 0.045  | 0.316  | -0.029 | -0.015 | 0.037  | 0.02   | -0.049 | -0.009 | 0.019  | 0.076  | 0.071  | 0.023  | 0.033  | 0.171  | -0.007 | 0.103  | -0.158 | 0.008  | -0.076 |
| CD200um glm Correlation               | 0.277  | 0.463  | 0.116  | 0.131  | -0.079 | -0.286 | 0.066  | -0.054 | -0.069 | 0.299  | -0.177 | 0.079  | 0.05   | -0.053 | 0.061  | -0.223 | -0.032 | 0.046  | 0.048  | -0.045 | 0.036  | 0.176  | 0.057  | -0.031 | 0.06   | 0.015  | 0.087  |

| Pathomic feature name               | PF1    | PF2    | PF3    | PF4    | PF5    | PF6    | PF7    | PF8    | PF9    | PF10   | PF11   | PF12   | PF13   | PF14   | PF15   | PF16   | PF17   | PF18   | PF19   | PF20     | PF21   | PF22   | PF23   | PF24   | PF25   | PF26   | PF27   |
|-------------------------------------|--------|--------|--------|--------|--------|--------|--------|--------|--------|--------|--------|--------|--------|--------|--------|--------|--------|--------|--------|----------|--------|--------|--------|--------|--------|--------|--------|
| CD200um glcm DifferenceAverage      | -0.046 | -0.665 | 0.345  | 0.138  | 0.043  | 0.142  | -0.038 | 0.007  | 0.064  | 0.013  | -0.018 | 0.037  | -0.083 | 0.068  | -0.03  | -0.072 | 0.068  | -0.105 | -0.08  | 0.079    | 0.002  | -0.113 | -0.005 | 0.011  | -0.062 | 0.039  | 0.022  |
| CD200um glcm DifferenceEntropy      | 0.694  | -0.173 | 0.32   | 0.106  | -0.114 | 0.083  | -0.02  | 0.089  | 0.034  | -0.01  | 0.016  | 0.056  | -0.015 | 0.003  | -0.024 | -0.004 | -0.042 | -0.017 | -0.007 | -0.017   | 0.08   | 0.003  | -0.091 | 0.044  | 0.046  | 0.011  | -0.024 |
| CD200um glcm DifferenceVariance     | 0.047  | -0.499 | 0.409  | 0.335  | 0.081  | 0.225  | -0.053 | -0.009 | 0.078  | 0.054  | 0.077  | -0.027 | 0.033  | 0.076  | -0.071 | -0.026 | 0.074  | -0.06  | -0.076 | 0.077    | 0.082  | -0.081 | 0.034  | -0.025 | -0.002 | -0.069 | -0.007 |
| CD200um glcm Imc2                   | -0.124 | -0.321 | -0.064 | 0.048  | 0.051  | -0.13  | -0.593 | -0.058 | 0.053  | 0.171  | -0.062 | -0.08  | 0.041  | -0.023 | -0.026 | -0.056 | 0.017  | 0.022  | -0.192 | -0.134   | 0.074  | -0.125 | 0.081  | 0.04   | 0.057  | -0.031 | -0.043 |
| CD200um glcm Idm                    | 0.059  | 0.644  | -0.13  | 0.156  | 0.286  | -0.089 | 0.006  | -0.004 | -0.009 | -0.053 | 0.221  | -0.031 | 0.182  | -0.011 | 0.004  | 0.012  | -0.054 | 0.049  | -0.015 | -0.032   | 0.124  | 0.09   | 0.019  | 0.017  | 0.081  | -0.045 | 0.024  |
| CD200um glcm Idmn                   | 0.515  | 0.542  | 0.073  | -0.004 | -0.131 | -0.139 | 0.053  | 0.008  | -0.002 | 0.052  | -0.016 | 0.06   | 0.063  | 0.029  | 0.034  | 0.102  | -0.05  | 0.062  | 0.119  | -0.079   | 0.036  | 0.134  | -0.016 | 0.002  | 0.043  | -0.021 | 0.06   |
| CD200um glcm InverseVariance        | -0.099 | 0.621  | -0.119 | -0.026 | 0.287  | 0.049  | -0.008 | -0.093 | 0.049  | 0.028  | 0.116  | -0.013 | 0.224  | -0.019 | 0.042  | 0.032  | 0.005  | 0.026  | 0.015  | -0.055   | 0.259  | 0.04   | 0.011  | 0.015  | -0.036 | -0.051 | -0.019 |
| CD200um glcm MaximumProbability     | -0.616 | -0.105 | -0.111 | 0.334  | 0.034  | -0.083 | -0.088 | 0.015  | -0.06  | -0.079 | 0.203  | 0.104  | 0.078  | 0.026  | -0.023 | -0.01  | 0.043  | 0.064  | 0.004  | 0.066    | 0.027  | -0.038 | 0.033  | 0.013  | 0.249  | -0.007 | 0.043  |
| CD200um gldm LDLGLE                 | -0.171 | 0.015  | 0.034  | 0.589  | 0.053  | -0.13  | -0.055 | -0.068 | 0.018  | -0.036 | 0.079  | 0.088  | -0.024 | 0.126  | 0.011  | -0.036 | 0.078  | 0.073  | 0.07   | 0.149    | 0.171  | 0.071  | 0.054  | 0.061  | 0.31   | 0.074  | 0.089  |
| CD200um gldm SDE                    | -0.295 | -0.497 | 0.033  | -0.315 | -0.13  | 0.185  | -0.049 | -0.099 | 0.096  | 0.115  | -0.219 | 0.069  | -0.017 | -0.007 | 0.033  | 0.03   | 0.084  | -0.032 | 0.031  | -0.008   | 0.053  | -0.11  | -0.05  | -0.026 | -0.124 | -0.003 | -0.083 |
| CD200um ngtdm Busyness              | -0.411 | 0.406  | -0.217 | 0.021  | 0.318  | 0.099  | 0.207  | -0.013 | 0.049  | 0.088  | 0.081  | 0.179  | -0.03  | -0.036 | 0.06   | 0.074  | 0.081  | -0.077 | -0.04  | 0.102    | 0.09   | -0.031 | -0.098 | 0.009  | -0.045 | 0.023  | 0.079  |
| CD200um ngtdm Coarseness            | -0.626 | -0.004 | -0.297 | -0.013 | 0.221  | -0.134 | -0.149 | -0.059 | 0.124  | -0.001 | -0.06  | 0.011  | 0.203  | -0.03  | -0.054 | -0.003 | -0.06  | 0.111  | -0.061 | -0.09    | -0.001 | -0.033 | -0.01  | -0.065 | 0.059  | -0.006 | -0.017 |
| CD200um ngtdm Contrast              | -0.522 | -0.437 | 0.049  | 0.006  | 0.057  | 0.081  | 0.025  | -0.106 | -0.134 | 0.15   | -0.084 | -0.002 | -0.129 | 0.012  | 0.032  | -0.088 | 0.153  | 0.006  | -0.026 | 0.179    | -0.063 | -0.027 | 0.168  | -0.108 | -0.078 | 0.013  | 0.086  |
| CD200um ngtdm Strength              | -0.123 | -0.395 | 0.147  | 0.134  | 0.092  | -0.242 | -0.209 | -0.003 | 0.11   | 0.396  | -0.135 | -0.089 | 0.144  | 0.131  | 0      | -0.019 | -0.036 | 0.06   | 0.183  | 0.025    | 0.074  | 0.218  | 0.106  | -0.064 | 0.028  | 0.043  | 0.018  |
| CD50um wav LH glcm Correlation      | 0.077  | 0.237  | 0.012  | 0.039  | 0.09   | -0.109 | -0.041 | 0.088  | 0.652  | -0.054 | -0.068 | -0.062 | 0.162  | 0.084  | 0.032  | -0.133 | 0.024  | -0.069 | 0.12   | 0.006    | 0.124  | 0.117  | -0.072 | -0.059 | 0.014  | -0.008 | -0.148 |
| CD50um wav LH glcm Imc2             | 0.019  | -0.154 | -0.078 | 0.032  | 0.054  | 0.041  | -0.742 | -0.094 | 0.019  | -0.068 | 0.011  | -0.023 | -0.008 | -0.027 | 0.006  | -0.022 | 0.011  | 0.007  | 0.046  | 0.059    | -0.037 | 0.076  | -0.078 | -0.018 | -0.019 | -0.017 | 0.033  |
| CD50um wav LH glcm InverseVariance  | -0.101 | 0.745  | 0.015  | 0.017  | 0.084  | -0.039 | 0.061  | -0.056 | -0.078 | -0.036 | 0.037  | 0.053  | -0.121 | 0.065  | 0.133  | -0.052 | 0.069  | -0.103 | 0.028  | 0.00E+00 | 0.079  | -0.088 | 0.044  | 0.003  | -0.086 | 0.041  | -0.045 |
| CD50um wav LH glrlm RunVariance     | 0.357  | 0.553  | 0.066  | 0.058  | 0.165  | 0.131  | 0.087  | -0.104 | -0.061 | -0.048 | 0.078  | 0.111  | -0.109 | 0.076  | 0.026  | 0.066  | 0.066  | -0.088 | -0.118 | 0.011    | 0.001  | -0.03  | 0.022  | 0.128  | -0.13  | 0.041  | -0.034 |
| CD50um wav LH ngtdm Busyness        | -0.765 | -0.145 | -0.146 | -0.036 | 0.01   | -0.036 | 0.062  | -0.05  | -0.134 | 0.014  | -0.034 | 0.036  | -0.064 | -0.048 | 0.051  | -0.026 | 0.017  | 0.003  | -0.023 | -0.008   | -0.102 | -0.024 | 0.021  | -0.064 | -0.004 | 0.033  | 0.007  |
| CD50um wav LH ngtdm Coarseness      | -0.493 | 0.12   | -0.334 | 0.035  | 0.217  | -0.065 | -0.252 | -0.065 | 0.291  | -0.036 | -0.042 | 0.029  | 0.181  | -0.015 | 0.086  | 0.062  | 0.096  | 0.036  | -0.044 | -0.053   | 0.077  | -0.102 | 0.024  | -0.108 | 0.031  | 0.028  | -0.102 |
| CD50um wav LH ngtdm Strength        | -0.125 | -0.608 | 0.253  | 0.049  | 0.058  | -0.042 | -0.234 | -0.007 | 0.066  | 0.04   | -0.122 | -0.274 | 0.041  | 0.053  | -0.011 | 0.003  | -0.028 | -0.032 | 0.036  | -0.06    | 0.161  | 0.055  | 0.035  | 0.069  | -0.019 | 0.091  | 0.089  |
| CD50um wav HL glcm ClusterShade     | 0.073  | -0.269 | 0.311  | -0.057 | 0.127  | -0.075 | -0.029 | -0.045 | 0.429  | -0.203 | 0.028  | -0.113 | 0.024  | 0.167  | -0.069 | 0.039  | -0.024 | -0.189 | 0.017  | -0.169   | -0.08  | 0.136  | -0.111 | 0.253  | -0.078 | -0.023 | -0.008 |
| CD50um wav HL glcm Imc2             | 0.031  | -0.165 | -0.075 | 0.028  | 0.036  | 0.053  | -0.727 | -0.091 | 0.027  | -0.071 | 0.013  | -0.016 | -0.003 | -0.022 | 0.013  | -0.017 | 0.019  | -0.002 | 0.052  | 0.063    | -0.054 | 0.086  | -0.096 | -0.029 | -0.012 | -0.019 | 0.023  |
| CD50um wav HL glcm InverseVariance  | 0.251  | 0.596  | -0.116 | 0.04   | 0.277  | -0.131 | 0.04   | -0.061 | 0.109  | 0.013  | -0.122 | 0.06   | 0.027  | 0.004  | -0.217 | 0.036  | -0.062 | 0.094  | 0.033  | 0.073    | -0.12  | -0.079 | 0.003  | 0.026  | 0.021  | -0.082 | -0.043 |
| CD50um wav HL glrlm RunVariance     | 0.289  | 0.506  | -0.137 | 0.029  | 0.099  | -0.043 | 0.086  | -0.013 | -0.04  | -0.065 | -0.076 | -0.003 | -0.046 | 0.033  | 0.014  | -0.014 | 0.111  | 0.005  | -0.124 | 0.051    | 0.023  | 0.004  | 0.423  | -0.035 | -0.066 | 0.022  | -0.029 |
| CD50um wav HL ngtdm Busyness        | -0.785 | -0.039 | -0.138 | -0.021 | 0.021  | -0.011 | 0.053  | -0.055 | -0.051 | -0.019 | -0.1   | 0.012  | -0.017 | -0.019 | 0.084  | -0.045 | 0.041  | -0.006 | -0.056 | -0.034   | 0.019  | 0.005  | 0.04   | -0.031 | -0.014 | 0.087  | 0.024  |
| CD50um wav HL ngtdm Coarseness      | -0.299 | 0.166  | -0.343 | 0.067  | 0.444  | -0.086 | -0.273 | -0.097 | 0.135  | 0.066  | -0.084 | 0.03   | 0.186  | -0.076 | -0.013 | 0.08   | -0.036 | -0.018 | -0.064 | -0.136   | 0.149  | -0.07  | 0.055  | -0.047 | 0.044  | 0.093  | 0.039  |
| CD50um wav HH firstorder Uniformity | -0.785 | 0.119  | -0.158 | -0.019 | -0.009 | -0.027 | -0.035 | -0.035 | 0.1    | 0.029  | -0.021 | 0.025  | 0.049  | -0.04  | 0.059  | 0.007  | 0.045  | 0.014  | -0.019 | -0.024   | 0.039  | -0.017 | 0.015  | -0.038 | -0.003 | -0.002 | 0.018  |
| CD50um wav HH glcm Imc2             | -0.012 | -0.212 | -0.093 | 0.035  | 0.05   | 0.026  | -0.749 | -0.112 | -0.005 | -0.048 | -0.001 | -0.03  | -0.025 | -0.024 | 0.003  | -0.009 | 0.009  | -0.002 | 0.037  | 0.048    | -0.043 | 0.055  | -0.066 | -0.019 | -0.01  | 0.002  | 0.01   |

| Pathomic feature name                 | PF1    | PF2    | PF3    | PF4    | PF5    | PF6    | PF7    | PF8    | PF9    | PF10   | PF11   | PF12   | PF13   | PF14   | PF15   | PF16     | PF17   | PF18   | PF19   | PF20   | PF21   | PF22     | PF23   | PF24   | PF25   | PF26   | PF27   |
|---------------------------------------|--------|--------|--------|--------|--------|--------|--------|--------|--------|--------|--------|--------|--------|--------|--------|----------|--------|--------|--------|--------|--------|----------|--------|--------|--------|--------|--------|
| CD50um wav HH glcm Idm                | -0.127 | 0.754  | -0.082 | 0.011  | 0.044  | 0.054  | 0.011  | -0.048 | 0.211  | 0.044  | -0.036 | 0.055  | 0.046  | 0.003  | -0.094 | 0.034    | 0.049  | -0.021 | -0.021 | 0.028  | 0.069  | 0.026    | -0.007 | -0.013 | -0.004 | 0.006  | 0.051  |
| CD50um wav HH glcm Idn                | 0.623  | 0.341  | 0.269  | -0.041 | -0.06  | 0.056  | 0.123  | 0.116  | -0.041 | 0.059  | 0.012  | -0.042 | -0.022 | 0.081  | -0.07  | -0.001   | 0.019  | -0.001 | 0.177  | -0.013 | -0.009 | 0.036    | 0.034  | 0.068  | 0.002  | -0.013 | -0.074 |
| CD50um wav HH glcm InverseVariance    | 0.118  | 0.667  | -0.09  | 0.026  | 0.245  | 0.058  | 0.04   | -0.107 | 0.102  | 0.061  | -0.019 | 0.064  | 0.044  | -0.019 | -0.277 | 0.095    | 0.024  | 0.046  | -0.061 | 0.063  | -0.049 | 0.034    | 0.014  | -0.015 | -0.031 | 0.012  | 0.018  |
| CD50um wav HH glrlm RunVariance       | 0.074  | 0.686  | -0.034 | -0.016 | -0.24  | 0.02   | 0.058  | 0.038  | 0.147  | -0.005 | -0.07  | -0.011 | -0.051 | 0.115  | 0.037  | -0.103   | 0.012  | -0.127 | 0.061  | 0.041  | 0.064  | -0.029   | -0.032 | -0.02  | 0.06   | 0.039  | 0.059  |
| CD50um wav HH ngtdm Busyness          | -0.736 | 0.27   | -0.069 | 0.01   | 0.01   | 0.012  | 0.022  | 0.004  | 0.12   | -0.005 | 0.011  | 0.088  | 0.07   | -0.056 | 0.067  | 0.015    | 0.084  | 0.007  | -0.067 | -0.006 | 0.131  | 0.019    | -0.007 | -0.003 | 0.002  | -0.005 | 0.034  |
| CD50um wav LL glcm Imc2               | 0.727  | 0.014  | -0.004 | 0.017  | 0.113  | 0.063  | -0.048 | 0.006  | 0.287  | -0.027 | 0.104  | -0.007 | 0.158  | 0.041  | -0.054 | 0.001    | -0.005 | 0.037  | -0.048 | 0.047  | 0.021  | 0.00E+00 | 0.038  | 0.003  | -0.011 | -0.054 | 0.057  |
| CD50um wav LL glcm Idmn               | 0.676  | 0.315  | 0.152  | 0.048  | -0.005 | -0.095 | 0.101  | 0.022  | -0.151 | 0.102  | 0.067  | -0.104 | -0.051 | 0.087  | 0.001  | 0.027    | -0.034 | -0.017 | 0.091  | 0.016  | -0.083 | -0.004   | -0.014 | -0.007 | -0.017 | -0.005 | 0.055  |
| CD50um wav LL glcm InverseVariance    | 0.152  | 0.68   | -0.067 | -0.015 | 0.127  | 0.009  | 0.101  | -0.04  | -0.111 | -0.036 | 0.194  | 0.013  | -0.061 | -0.01  | 0.156  | 0.08     | -0.06  | -0.098 | 0.059  | 0.134  | -0.052 | -0.046   | 0.121  | -0.05  | -0.075 | 0.028  | 0.084  |
| CD50um wav LL glrlm ShortRunEmphasis  | -0.376 | -0.424 | -0.054 | 0.009  | 0.112  | 0.036  | -0.132 | -0.081 | 0      | 0.017  | -0.075 | 0.05   | 0.202  | -0.106 | 0.168  | -0.025   | 0.116  | 0.147  | -0.236 | -0.271 | -0.019 | 0.025    | 0.05   | -0.13  | -0.041 | 0.097  | 0.004  |
| CD50um wav LL ngtdm Busyness          | -0.806 | -0.064 | -0.093 | -0.035 | -0.092 | 0.006  | -0.025 | -0.006 | 0.039  | 0.038  | -0.015 | 0.018  | -0.002 | -0.044 | 0.048  | 0.00E+00 | 0.034  | 0.002  | 0.022  | -0.041 | 0.038  | -0.008   | -0.012 | -0.005 | 0.001  | -0.003 | -0.009 |
| CD50um wav LL ngtdm Coarseness        | -0.353 | 0.268  | -0.324 | 0.067  | 0.44   | -0.054 | -0.25  | -0.117 | -0.066 | 0.017  | 0.004  | 0.101  | 0.116  | 0.03   | 0.036  | 0.083    | 0.015  | 0.054  | -0.11  | -0.097 | 0.02   | -0.157   | 0.053  | -0.042 | 0.008  | 0.051  | -0.029 |
| CD50um lbp 2D firstorder Kurtosis     | 0.044  | -0.129 | 0.339  | 0.297  | -0.353 | 0.023  | 0.118  | 0.043  | -0.429 | -0.053 | 0.027  | -0.034 | -0.223 | 0.115  | -0.052 | -0.134   | -0.006 | -0.114 | -0.003 | 0.06   | -0.027 | 0.053    | 0.024  | -0.048 | -0.107 | 0.064  | -0.026 |
| CD50um lbp 2D firstorder RMAD         | 0.148  | 0.506  | -0.273 | -0.096 | 0.374  | -0.068 | -0.031 | 0.016  | 0.3    | 0.021  | -0.074 | -0.088 | 0.147  | -0.067 | -0.019 | 0.108    | -0.022 | 0.08   | 0.083  | -0.063 | -0.068 | -0.04    | 0.033  | 0.02   | 0.055  | -0.047 | 0.054  |
| CD50um lbp 2D firstorder Skewness     | -0.51  | -0.348 | -0.077 | -0.166 | 0.441  | -0.096 | -0.07  | -0.098 | -0.05  | 0.143  | -0.015 | 0.125  | 0.033  | -0.04  | 0.05   | 0.017    | 0.05   | 0.024  | 0.01   | 0.034  | 0.002  | -0.035   | -0.008 | -0.011 | -0.01  | -0.008 | 0.014  |
| CD50um lbp 2D glcm Autocorrelation    | 0.513  | 0.486  | 0.036  | 0.311  | -0.136 | 0.055  | 0.046  | 0.052  | 0.169  | -0.077 | 0.026  | -0.08  | 0.008  | 0.039  | -0.085 | -0.019   | -0.037 | -0.021 | -0.005 | -0.029 | 0.02   | 0.034    | 0.013  | -0.023 | -0.003 | 0.018  | -0.052 |
| CD50um lbp 2D glcm ClusterProminence  | 0.081  | -0.042 | -0.132 | -0.064 | 0.671  | -0.026 | -0.068 | 0.128  | 0.044  | 0.174  | 0.149  | -0.063 | 0.083  | -0.008 | -0.148 | 0.068    | 0.049  | 0.027  | 0.17   | 0.004  | -0.067 | 0.059    | 0.07   | 0.104  | -0.008 | 0.055  | -0.14  |
| CD50um lbp 2D glcm ClusterShade       | -0.442 | -0.512 | 0.068  | -0.383 | 0.037  | -0.027 | -0.039 | -0.014 | -0.171 | 0.066  | -0.03  | 0.019  | 0.004  | -0.007 | -0.032 | 0.02     | 0.089  | -0.067 | 0.029  | 0.071  | 0.033  | 0.001    | 0.006  | 0.037  | -0.04  | -0.074 | 0.024  |
| CD50um lbp 2D glcm ClusterTendency    | 0.294  | 0.072  | -0.12  | 0.096  | 0.524  | -0.005 | -0.065 | 0.137  | 0.178  | 0.087  | 0.222  | -0.091 | 0.139  | 0.004  | -0.192 | 0.055    | 0.086  | -0.01  | 0.186  | -0.001 | -0.035 | 0.051    | 0.069  | 0.072  | -0.006 | -0.037 | -0.185 |
| CD50um lbp 2D glcm DifferenceAverage  | -0.158 | 0.364  | -0.215 | -0.53  | -0.06  | -0.032 | 0.001  | 0      | 0.116  | -0.114 | -0.18  | -0.155 | 0.03   | -0.052 | 0.066  | 0.117    | -0.058 | 0.045  | 0.077  | -0.088 | -0.083 | -0.088   | 0.005  | 0.072  | 0.084  | -0.116 | 0.157  |
| CD50um lbp 2D glcm JointEntropy       | 0.086  | -0.576 | 0.085  | -0.316 | -0.104 | -0.037 | -0.038 | -0.113 | -0.002 | 0.078  | 0.187  | 0.281  | 0.009  | -0.004 | 0.078  | -0.033   | 0.001  | 0.072  | -0.154 | 0.036  | 0.149  | 0.047    | -0.113 | 0.002  | 0.036  | 0.042  | -0.046 |
| CD50um lbp 2D glcm Imc2               | -0.701 | -0.238 | -0.041 | 0.154  | 0.031  | 0.054  | -0.059 | 0.01   | 0.029  | -0.004 | -0.174 | -0.085 | 0.073  | -0.006 | 0.141  | 0.028    | 0.059  | 0.001  | 0.052  | -0.004 | -0.017 | -0.057   | 0.091  | -0.03  | -0.029 | -0.024 | 0.099  |
| CD50um lbp 2D glcm Idm                | 0.251  | -0.009 | 0.092  | 0.695  | 0.214  | 0.043  | 0.007  | 0.022  | -0.09  | 0.088  | -0.034 | -0.054 | -0.04  | -0.003 | -0.102 | -0.059   | -0.017 | -0.049 | -0.002 | 0.028  | -0.038 | 0.013    | 0.045  | -0.09  | -0.082 | 0.079  | -0.125 |
| CD50um lbp 2D glcm Id                 | 0.215  | -0.061 | 0.111  | 0.715  | 0.196  | 0.031  | 0.003  | 0.01   | -0.078 | 0.096  | -0.003 | -0.02  | -0.034 | -0.005 | -0.1   | -0.059   | -0.015 | -0.056 | -0.01  | 0.022  | -0.019 | 0.015    | 0.028  | -0.097 | -0.085 | 0.069  | -0.119 |
| CD50um lbp 2D glcm MaximumProbability | 0.028  | 0.005  | 0.103  | 0.774  | 0.017  | 0.032  | 0.004  | 0.047  | -0.016 | 0.029  | -0.09  | -0.101 | -0.033 | 0.054  | -0.023 | 0.02     | -0.002 | -0.102 | 0.108  | -0.06  | -0.04  | -0.032   | 0.064  | -0.071 | -0.077 | 0.024  | 0.01   |
| CD50um lbp 2D glcm SumSquares         | 0.073  | 0.431  | -0.268 | -0.282 | 0.309  | -0.024 | -0.026 | 0.091  | 0.169  | -0.045 | -0.105 | -0.253 | 0.079  | -0.056 | -0.074 | 0.12     | -0.004 | 0.026  | 0.192  | -0.072 | -0.144 | -0.071   | 0.073  | 0.079  | 0.058  | -0.117 | 0.013  |
| CD50um lbp 2D glrlm LRLGLE            | -0.198 | 0.144  | -0.099 | 0.16   | 0.704  | -0.168 | -0.057 | -0.051 | 0.054  | 0.116  | -0.105 | 0.031  | 0.07   | -0.051 | 0.018  | 0.057    | -0.009 | 0.038  | 0.074  | -0.02  | -0.052 | -0.04    | -0.005 | -0.042 | -0.022 | -0.016 | 0.044  |
| CD50um lbp 2D glrlm RunEntropy        | 0.331  | -0.506 | 0.144  | 0.283  | -0.335 | 0.116  | -0.027 | -0.046 | -0.04  | 0.045  | 0.082  | 0.075  | -0.058 | -0.031 | -0.066 | -0.06    | -0.077 | -0.021 | -0.108 | -0.027 | 0.095  | 0.033    | -0.077 | -0.034 | -0.014 | 0.025  | -0.125 |
| CD50um lbp 2D glrlm RunVariance       | 0.063  | -0.09  | 0.138  | 0.793  | -0.062 | 0.025  | -0.009 | 0.051  | -0.01  | -0.003 | -0.024 | 0.005  | 0.048  | 0.009  | 0.017  | 0.041    | -0.026 | -0.04  | 0.023  | -0.031 | -0.009 | -0.005   | -0.01  | -0.074 | -0.043 | -0.03  | 0.007  |
| CD50um lbp 2D glrlm SRLGLE            | -0.194 | 0.169  | -0.119 | 0.014  | 0.706  | -0.156 | -0.057 | -0.057 | 0.082  | 0.123  | -0.114 | 0.031  | 0.063  | -0.029 | 0.035  | 0.066    | -0.003 | 0.041  | 0.095  | -0.049 | -0.04  | -0.047   | 0.007  | 0.001  | -0.018 | -0.031 | 0.091  |
| CD50um lbp 2D glszm GLNUN             | 0.035  | 0.662  | -0.096 | 0.03   | 0.409  | -0.085 | 0.053  | 0.016  | -0.004 | -0.014 | -0.106 | -0.128 | 0.012  | -0.008 | -0.059 | -0.003   | -0.012 | -0.013 | 0.063  | -0.002 | -0.088 | -0.018   | 0.079  | -0.016 | -0.019 | 0.029  | 0.044  |
| CD50um lbp 2D glldm LDHGLE            | 0.393  | 0.162  | 0.12   | 0.642  | -0.156 | 0.065  | 0.036  | 0.06   | 0.017  | -0.011 | 0.001  | -0.1   | -0.021 | 0.018  | -0.083 | 0.012    | -0.063 | -0.08  | 0.042  | -0.076 | -0.012 | 0.002    | 0.025  | -0.047 | -0.068 | -0.021 | 0.003  |

| Pathomic feature name                  | PF1    | PF2    | PF3    | PF4    | PF5    | PF6    | PF7    | PF8    | PF9    | PF10   | PF11   | PF12   | PF13   | PF14   | PF15   | PF16   | PF17   | PF18   | PF19   | PF20   | PF21   | PF22   | PF23   | PF24   | PF25   | PF26   | PF27   |
|----------------------------------------|--------|--------|--------|--------|--------|--------|--------|--------|--------|--------|--------|--------|--------|--------|--------|--------|--------|--------|--------|--------|--------|--------|--------|--------|--------|--------|--------|
| CD50um lbp 2D gldm LDLGLE              | -0.254 | 0.138  | -0.132 | -0.043 | 0.7    | -0.188 | -0.055 | -0.061 | 0.034  | 0.104  | -0.083 | 0.04   | 0.066  | -0.066 | 0.018  | 0.037  | 0.007  | 0.058  | 0.047  | 0.02   | -0.055 | -0.032 | -0.009 | -0.046 | -0.004 | 0.001  | 0.009  |
| CD50um lbp 2D gldm SDE                 | -0.334 | -0.046 | -0.108 | -0.683 | 0.011  | -0.062 | -0.024 | -0.002 | 0.055  | -0.057 | 0.036  | 0.095  | 0.06   | 0.036  | 0.146  | 0.043  | 0.095  | 0.078  | 0.012  | 0.034  | 0.013  | -0.017 | -0.011 | 0.088  | 0.078  | -0.041 | 0.09   |
| CD50um lbp 2D gldm SDHGLE              | 0.383  | 0.393  | 0.002  | -0.174 | -0.505 | 0.068  | 0.074  | 0.097  | 0.062  | -0.212 | 0.022  | -0.117 | -0.018 | 0.032  | -0.004 | -0.013 | -0.009 | 0.017  | -0.039 | 0.004  | -0.02  | 0.03   | 0.009  | 0.028  | 0.066  | 0.022  | -0.035 |
| CD50um lbp 2D ngtdm Complexity         | 0.058  | 0.458  | -0.205 | -0.331 | -0.231 | 0.05   | 0.057  | 0.087  | 0.016  | -0.138 | -0.178 | -0.268 | -0.012 | -0.054 | -0.043 | 0.083  | -0.03  | -0.005 | 0.134  | -0.07  | -0.189 | -0.129 | 0.06   | 0.071  | 0.066  | -0.119 | 0.097  |
| CD50um lbp 2D ngtdm Contrast           | 0.045  | 0.445  | -0.287 | -0.37  | -0.08  | 0.036  | -0.008 | 0.077  | 0.198  | -0.091 | -0.136 | -0.206 | 0.088  | -0.085 | -0.004 | 0.144  | -0.031 | 0.045  | 0.127  | -0.1   | -0.131 | -0.115 | 0.023  | 0.088  | 0.102  | -0.127 | 0.089  |
| CD100um lbp 2D firstorder Uniformity   | -0.732 | 0.138  | -0.054 | -0.028 | 0.032  | -0.027 | 0.064  | 0.039  | -0.094 | -0.029 | 0.078  | -0.016 | -0.055 | -0.021 | 0.122  | 0.053  | -0.029 | -0.106 | 0.125  | 0.058  | -0.086 | -0.005 | 0.108  | 0.096  | -0.07  | 0.011  | 0.042  |
| CD100um lbp 2D glcm Autocorrelation    | 0.647  | 0.374  | -0.001 | 0.166  | -0.146 | 0.084  | 0.079  | 0.007  | 0.057  | -0.045 | -0.005 | -0.037 | -0.059 | 0.023  | 0.056  | 0.037  | 0.012  | 0.138  | 0.04   | 0.015  | -0.098 | -0.075 | 0.071  | -0.035 | 0.009  | 0.066  | 0.024  |
| CD100um lbp 2D glcm ClusterShade       | -0.551 | -0.185 | -0.019 | -0.219 | -0.006 | 0.034  | -0.125 | 0.014  | 0.317  | -0.005 | -0.087 | 0.078  | 0.193  | -0.03  | -0.166 | 0.095  | 0.044  | -0.052 | 0.068  | 0.009  | 0.09   | 0.045  | -0.052 | 0.078  | 0.042  | -0.241 | -0.038 |
| CD100um lbp 2D glcm ClusterTendency    | 0.587  | 0.139  | -0.14  | 0.109  | 0.087  | 0.272  | -0.039 | 0.06   | 0.12   | 0.018  | -0.139 | -0.099 | 0.029  | -0.087 | 0      | 0.166  | -0.008 | 0.102  | -0.01  | 0.147  | -0.08  | -0.017 | 0.185  | -0.046 | 0.082  | 0.07   | -0.013 |
| CD100um lbp 2D glcm Contrast           | -0.176 | 0.372  | -0.138 | -0.266 | -0.136 | 0.156  | 0.112  | 0.04   | -0.486 | -0.14  | 0.126  | -0.091 | -0.047 | -0.071 | 0.129  | -0.009 | -0.005 | -0.097 | 0.107  | -0.024 | 0.027  | 0.007  | 0.131  | 0.04   | 0.001  | -0.11  | 0.017  |
| CD100um lbp 2D glcm Correlation        | 0.493  | -0.163 | 0.007  | 0.267  | 0.144  | 0.056  | -0.096 | 0.001  | 0.402  | 0.107  | -0.179 | -0.005 | 0.052  | -0.003 | -0.089 | 0.107  | -0.011 | 0.131  | -0.07  | 0.118  | -0.074 | -0.014 | 0.025  | -0.06  | 0.047  | 0.108  | -0.022 |
| CD100um lbp 2D glcm DifferenceEntropy  | 0.689  | 0.182  | 0.022  | -0.098 | -0.061 | 0.006  | 0.075  | -0.156 | 0.02   | -0.075 | 0.022  | 0.096  | -0.053 | -0.019 | -0.092 | -0.006 | 0.025  | -0.043 | 0.03   | 0.044  | -0.034 | -0.066 | 0.056  | -0.045 | -0.033 | -0.264 | 0.035  |
| CD100um lbp 2D glcm DifferenceVariance | -0.229 | 0.319  | -0.096 | -0.06  | 0.077  | -0.054 | 0.034  | 0.139  | -0.551 | -0.142 | 0.19   | -0.055 | -0.05  | -0.146 | 0.084  | -0.007 | -0.095 | -0.143 | 0.102  | -0.118 | -0.013 | 0.063  | 0.044  | 0.107  | 0.024  | 0.034  | -0.041 |
| CD100um lbp 2D glcm JointEnergy        | -0.75  | 0.066  | -0.058 | 0.084  | -0.138 | 0.064  | -0.013 | 0.107  | -0.175 | -0.016 | 0.092  | -0.005 | 0.009  | -0.068 | 0.081  | 0.036  | 0.001  | 0.004  | 0.084  | -0.057 | 0.018  | 0.022  | 0.04   | 0.08   | 0.02   | -0.01  | -0.02  |
| CD100um lbp 2D glcm JointEntropy       | 0.789  | 0.024  | 0.094  | 0.009  | 0.082  | -0.071 | 0.009  | -0.067 | 0.12   | 0.007  | -0.05  | 0.017  | -0.016 | 0.047  | -0.066 | -0.02  | -0.016 | -0.005 | -0.076 | 0.012  | 0.008  | -0.008 | -0.057 | -0.054 | -0.006 | 0.014  | 0.003  |
| CD100um lbp 2D glcm Imc1               | 0.784  | 0.087  | 0.127  | -0.018 | 0.035  | -0.072 | 0.055  | -0.048 | -0.009 | -0.014 | -0.066 | -0.002 | -0.094 | 0.073  | -0.038 | 0.006  | -0.041 | -0.072 | 0.009  | 0.041  | -0.035 | -0.006 | -0.023 | 0.008  | -0.042 | 0.018  | 0.025  |
| CD100um lbp 2D glcm Id                 | 0.118  | -0.131 | 0.11   | 0.522  | 0.252  | -0.31  | -0.117 | 0.082  | 0.138  | 0.008  | 0.036  | 0.115  | 0.031  | -0.052 | -0.177 | 0.003  | -0.108 | 0.003  | 0.009  | -0.056 | -0.097 | 0.043  | -0.14  | 0.087  | 0.011  | 0.077  | -0.084 |
| CD100um lbp 2D glcm InverseVariance    | 0.187  | -0.102 | 0.076  | -0.181 | 0.259  | -0.076 | -0.031 | 0.163  | -0.194 | 0.035  | -0.192 | -0.153 | 0.037  | 0.055  | 0.134  | -0.015 | 0.102  | 0.004  | -0.112 | 0.043  | 0.001  | 0.062  | 0.004  | -0.019 | -0.013 | 0.496  | -0.011 |
| CD100um lbp 2D glcm MaximumProbability | -0.485 | 0.031  | -0.059 | 0.496  | -0.045 | -0.037 | -0.034 | 0.087  | -0.297 | -0.02  | 0.135  | 0.05   | -0.034 | -0.112 | 0.093  | 0.054  | -0.052 | 0.036  | 0.063  | -0.112 | -0.018 | -0.012 | -0.007 | 0.13   | 0.059  | -0.007 | -0.044 |
| CD100um lbp 2D glcm SumEntropy         | 0.772  | -0.107 | -0.019 | 0.005  | 0.152  | -0.015 | 0.029  | -0.074 | 0.037  | 0.006  | -0.076 | -0.048 | -0.05  | 0.041  | -0.037 | -0.006 | -0.083 | -0.009 | -0.062 | 0.05   | -0.099 | -0.024 | 0.003  | -0.07  | 0.002  | 0.037  | 0.024  |
| CD100um lbp 2D glcm SumSquares         | 0.228  | 0.413  | -0.211 | -0.16  | -0.062 | 0.313  | 0.072  | 0.074  | -0.343 | -0.11  | 0.019  | -0.143 | -0.021 | -0.119 | 0.112  | 0.101  | -0.01  | -0.019 | 0.086  | 0.076  | -0.029 | -0.006 | 0.234  | 0.005  | 0.055  | -0.049 | 0.006  |
| CD100um lbp 2D glrlm GrayLevelVariance | 0.523  | 0.412  | -0.144 | -0.049 | 0.067  | 0.068  | 0.104  | 0.017  | -0.339 | -0.105 | 0.043  | -0.092 | -0.077 | -0.053 | 0.091  | 0.006  | -0.074 | -0.03  | 0.025  | 0.037  | -0.107 | -0.024 | 0.132  | -0.005 | 0.02   | 0.03   | -0.029 |
| CD100um lbp 2D glrlm LRLGLE            | -0.345 | 0.091  | -0.095 | 0.011  | 0.595  | -0.183 | -0.062 | 0.017  | -0.196 | -0.055 | 0.033  | 0.043  | 0.062  | -0.102 | -0.063 | -0.039 | -0.173 | -0.188 | -0.044 | 0.02   | 0.025  | 0.068  | 0.008  | 0.062  | 0.028  | -0.028 | -0.048 |
| CD100um lbp 2D glrlm LGLRE             | -0.4   | 0.149  | -0.11  | -0.061 | 0.562  | -0.099 | -0.059 | 0.013  | -0.221 | -0.021 | -0.112 | 0.036  | 0.057  | -0.117 | -0.04  | -0.007 | -0.137 | -0.176 | -0.002 | 0.06   | 0.066  | 0.07   | 0.046  | 0.052  | 0.037  | -0.032 | -0.02  |
| CD100um lbp 2D glszm GLNUN             | -0.759 | 0.106  | -0.055 | -0.087 | 0.066  | -0.043 | 0.047  | 0.058  | -0.101 | -0.019 | 0.072  | -0.026 | -0.012 | -0.03  | 0.112  | 0.002  | -0.018 | -0.118 | 0.059  | 0.053  | -0.042 | 0.021  | 0.082  | 0.06   | -0.066 | 0.038  | 0.007  |
| CD100um lbp 2D glszm ZoneVariance      | 0.122  | 0.019  | -0.003 | 0.65   | -0.066 | -0.139 | -0.028 | -0.026 | 0.003  | -0.019 | 0.104  | 0.144  | -0.132 | 0.053  | -0.063 | -0.046 | 0.05   | 0.187  | -0.035 | 0.052  | -0.002 | 0.005  | -0.019 | 0.302  | 0.07   | -0.039 | 0.005  |
| CD100um lbp 2D gldm DependenceEntropy  | 0.747  | 0.065  | 0.112  | 0.197  | 0.017  | -0.106 | -0.026 | 0.006  | 0.096  | -0.033 | -0.007 | 0.04   | -0.013 | -0.005 | -0.148 | -0.027 | -0.042 | 0.014  | -0.025 | -0.042 | -0.024 | 0.024  | -0.072 | 0      | 0      | -0.009 | -0.062 |
| CD100um lbp 2D gldm LDHGLE             | 0.389  | 0.377  | 0.065  | 0.472  | -0.218 | 0.041  | 0.02   | 0.047  | -0.008 | -0.035 | -0.008 | 0.081  | -0.081 | -0.034 | -0.034 | 0.109  | -0.027 | 0.118  | 0.154  | -0.015 | -0.048 | -0.032 | 0.049  | 0.112  | 0.04   | -0.075 | 0.05   |
| CD100um lbp 2D gldm SDHGLE             | 0.601  | 0.325  | -0.037 | -0.081 | -0.24  | 0.07   | 0.153  | 0.002  | -0.142 | -0.094 | 0.068  | -0.129 | -0.098 | 0.063  | 0.107  | -0.015 | -0.002 | 0.08   | 0.003  | 0.01   | -0.119 | -0.068 | 0.079  | -0.057 | -0.008 | 0.089  | -0.009 |



| Pathomic feature name                  | PF1    | PF2    | PF3    | PF4    | PF5    | PF6    | PF7    | PF8    | PF9    | PF10     | PF11   | PF12   | PF13   | PF14   | PF15   | PF16   | PF17   | PF18   | PF19   | PF20   | PF21   | PF22   | PF23   | PF24   | PF25   | PF26   | PF27   |
|----------------------------------------|--------|--------|--------|--------|--------|--------|--------|--------|--------|----------|--------|--------|--------|--------|--------|--------|--------|--------|--------|--------|--------|--------|--------|--------|--------|--------|--------|
| CD100um lbp 2D ngtdm Contrast          | -0.312 | 0.363  | -0.082 | -0.151 | -0.201 | 0.136  | 0.079  | 0.058  | -0.525 | -0.075   | 0.002  | -0.066 | -0.125 | -0.072 | 0.072  | 0.044  | -0.006 | -0.053 | 0.135  | -0.028 | -0.002 | -0.011 | 0.081  | 0.047  | 0.046  | -0.041 | -0.071 |
| CD150um wav LH firstorder Uniformity   | -0.753 | 0.198  | -0.156 | -0.017 | 0.102  | -0.034 | 0.008  | -0.069 | 0.027  | 0.017    | -0.033 | 0.032  | -0.027 | -0.007 | 0.107  | -0.023 | 0.054  | -0.034 | -0.044 | 0.029  | -0.013 | -0.077 | 0.039  | -0.068 | -0.033 | 0.031  | 0.02   |
| CD150um wav LH glcm DifferenceEntropy  | 0.742  | -0.001 | 0.274  | 0.071  | -0.131 | 0.033  | -0.03  | 0.063  | 0.038  | -0.041   | 0.049  | -0.004 | -0.001 | -0.037 | -0.018 | 0.051  | -0.016 | 0.015  | 0.015  | -0.05  | 0.087  | 0.057  | -0.043 | 0.046  | 0.035  | -0.002 | -0.004 |
| CD150um wav LH glcm DifferenceVariance | -0.015 | -0.428 | 0.483  | 0.135  | 0.018  | -0.018 | -0.111 | -0.088 | -0.263 | -0.025   | -0.091 | -0.215 | -0.097 | 0.026  | -0.008 | 0.02   | -0.071 | -0.063 | -0.04  | -0.057 | 0.091  | -0.03  | -0.002 | 0.074  | 0.016  | 0.105  | 0.161  |
| CD150um wav LH glcm Idmn               | 0.619  | 0.385  | 0.229  | 0.006  | -0.105 | 0.037  | 0.07   | 0.027  | 0.167  | -0.022   | -0.002 | 0      | -0.039 | 0.048  | -0.047 | -0.015 | 0.087  | 0.016  | 0.068  | 0.077  | 0.092  | -0.009 | -0.028 | -0.018 | -0.024 | -0.075 | -0.085 |
| CD150um wav LH glcm InverseVariance    | 0.044  | 0.74   | -0.028 | 0.013  | 0.092  | -0.06  | 0.078  | -0.072 | 0.042  | -0.067   | 0.11   | 0.03   | -0.036 | 0.083  | 0.144  | -0.012 | 0.059  | -0.087 | -0.074 | 0.073  | 0.048  | -0.056 | 0.083  | -0.063 | -0.071 | -0.018 | -0.006 |
| CD150um wav LH glrlm LRHGLE            | 0.189  | -0.21  | 0.571  | 0.114  | -0.09  | -0.073 | 0.043  | 0.026  | -0.127 | 0.126    | -0.074 | -0.208 | -0.071 | 0.133  | -0.079 | -0.084 | -0.072 | 0.017  | -0.004 | -0.027 | 0.211  | -0.09  | -0.026 | 0.018  | -0.001 | 0.07   | 0.04   |
| CD150um wav LH glszm SZNUN             | -0.073 | -0.702 | -0.095 | -0.059 | -0.047 | -0.113 | -0.08  | 0.053  | 0.202  | 0.047    | -0.039 | -0.069 | 0.13   | -0.05  | -0.05  | -0.028 | -0.081 | 0.061  | -0.09  | 0.069  | -0.02  | 0.104  | -0.073 | -0.103 | 0.125  | -0.039 | 0.05   |
| CD150um wav LH glDm DependenceVariance | 0.137  | 0.678  | 0.064  | 0.063  | 0.146  | 0.057  | 0.077  | -0.065 | -0.111 | 0.009    | 0.041  | 0.105  | -0.147 | 0.047  | 0.054  | -0.029 | 0.042  | -0.103 | -0.091 | 0.005  | 0.071  | -0.059 | -0.039 | 0.134  | -0.088 | 0.066  | -0.06  |
| CD150um wav LH ngtdm Busyness          | -0.707 | 0.046  | -0.183 | -0.034 | 0.094  | -0.007 | 0.241  | -0.05  | -0.101 | -0.016   | 0.013  | 0.112  | -0.081 | -0.043 | 0.056  | -0.017 | 0.029  | -0.042 | -0.046 | 0.014  | -0.15  | 0.011  | 0.008  | -0.088 | -0.017 | 0.053  | 0.012  |
| CD150um wav HL firstorder Uniformity   | -0.742 | 0.183  | -0.187 | -0.01  | 0.167  | -0.034 | -0.003 | -0.063 | -0.001 | 0.03     | -0.073 | 0.029  | 0.037  | -0.032 | 0.039  | -0.003 | 0.019  | 0.036  | -0.042 | -0.002 | 0.021  | -0.031 | 0.085  | -0.021 | -0.025 | 0.051  | 0.074  |
| CD150um wav HL glcm Imc2               | -0.06  | -0.269 | -0.086 | 0.024  | -0.018 | 0.035  | -0.743 | -0.101 | 0.009  | -0.028   | -0.009 | -0.039 | 0      | -0.033 | 0.007  | 0      | 0.024  | -0.009 | 0.041  | 0.014  | -0.039 | 0.052  | -0.067 | -0.027 | 0.012  | -0.016 | -0.011 |
| CD150um wav HL glszm SmallAreaEmphasis | -0.342 | -0.57  | 0.162  | -0.054 | -0.132 | 0.045  | -0.085 | -0.001 | 0.027  | -0.051   | 0.075  | -0.046 | 0.022  | -0.017 | 0.155  | -0.101 | -0.086 | -0.083 | -0.023 | -0.098 | 0.103  | 0.011  | -0.26  | 0.013  | 0.052  | 0.054  | 0.016  |
| CD150um wav HL ngtdm Contrast          | -0.62  | -0.313 | 0.047  | -0.049 | -0.022 | -0.103 | 0.038  | -0.084 | -0.134 | -0.005   | -0.077 | 0.001  | -0.195 | 0.016  | 0.037  | -0.069 | 0.166  | -0.071 | -0.016 | 0.1    | -0.157 | -0.091 | 0.089  | -0.083 | -0.096 | 0.035  | -0.055 |
| CD150um wav HH glcm ClusterProminence  | -0.031 | -0.452 | 0.406  | 0.115  | 0.164  | 0.021  | -0.055 | 0.113  | 0.167  | -0.136   | 0.054  | 0.044  | 0.081  | 0.206  | -0.108 | 0.021  | 0.116  | -0.231 | 0.009  | 0.015  | -0.016 | -0.123 | -0.016 | 0.196  | -0.107 | 0.012  | 0.087  |
| CD150um wav HH glcm Correlation        | 0.51   | -0.053 | -0.019 | 0.07   | 0.143  | -0.073 | 0.023  | -0.024 | 0.238  | 0.079    | 0.163  | -0.262 | -0.014 | 0.189  | 0.019  | -0.145 | -0.06  | -0.098 | 0.192  | -0.071 | 0.017  | 0.143  | -0.18  | -0.042 | -0.131 | -0.059 | -0.079 |
| CD150um wav HH glcm InverseVariance    | 0.154  | 0.704  | -0.082 | 0.025  | 0.283  | 0.013  | 0.049  | -0.124 | 0.038  | 0.063    | 0.035  | 0.033  | -0.029 | 0      | -0.105 | 0.035  | 0.09   | -0.024 | -0.066 | 0.046  | -0.012 | 0.02   | 0.062  | -0.054 | -0.09  | -0.025 | -0.021 |
| CD150um wav HH glszm SZNUN             | -0.229 | -0.715 | 0.058  | 0.004  | 0.112  | -0.066 | -0.055 | -0.026 | -0.104 | -0.022   | 0.136  | 0.017  | -0.043 | -0.047 | 0.067  | -0.033 | -0.002 | -0.009 | -0.007 | -0.04  | 0.053  | 0.006  | -0.01  | -0.017 | -0.03  | -0.14  | -0.138 |
| CD150um wav HH ngtdm Busyness          | -0.517 | 0.485  | -0.093 | 0.042  | 0.23   | -0.03  | 0.168  | -0.027 | 0.106  | -0.037   | 0.011  | 0.124  | 0.046  | -0.052 | 0.046  | -0.005 | 0.091  | -0.011 | -0.157 | 0.07   | 0.091  | 0.024  | -0.012 | -0.033 | -0.022 | 0.024  | 0.046  |
| CD150um wav HH ngtdm Strength          | -0.184 | -0.678 | 0.165  | 0.017  | 0.17   | 0.046  | -0.14  | 0.086  | 0.166  | 0.001    | -0.025 | -0.096 | 0.067  | 0.144  | -0.016 | -0.015 | 0.019  | -0.062 | 0.029  | 0.026  | 0.014  | -0.09  | 0.07   | 0.094  | -0.056 | 0.085  | 0.053  |
| CD150um wav LL glcm Imc2               | 0.577  | -0.1   | -0.032 | 0.034  | 0.105  | 0.036  | -0.394 | -0.034 | 0.301  | 0.01     | 0.078  | -0.045 | 0.179  | 0.009  | -0.054 | -0.045 | -0.008 | 0.052  | -0.097 | 0.017  | 0.044  | -0.011 | 0.054  | 0.03   | 0      | -0.077 | 0.083  |
| CD150um wav LL glcm InverseVariance    | -0.108 | 0.649  | -0.04  | -0.02  | 0.026  | 0.032  | 0.113  | 0.035  | -0.345 | 0.00E+00 | 0.099  | 0.018  | -0.186 | 0.011  | 0.05   | 0.065  | -0.036 | -0.111 | 0.136  | 0.05   | -0.05  | -0.045 | -0.018 | 0.051  | -0.056 | 0.014  | 0.026  |
| CD150um wav LL glszm SmallAreaEmphasis | -0.352 | -0.553 | -0.037 | -0.009 | 0.035  | 0.057  | -0.122 | 0.019  | 0.015  | 0.069    | -0.138 | 0.026  | 0.153  | -0.028 | 0.019  | 0.002  | 0.068  | 0.126  | -0.159 | -0.244 | 0.061  | 0.077  | -0.161 | 0.037  | 0.029  | 0.039  | -0.018 |
| CD150um wav LL ngtdm Coarseness        | -0.461 | 0.109  | -0.337 | 0.043  | 0.381  | -0.039 | -0.259 | -0.1   | -0.027 | 0.044    | -0.011 | 0.092  | 0.181  | 0.026  | -0.01  | 0.077  | 0.013  | 0.084  | -0.092 | -0.1   | 0.028  | -0.156 | 0.045  | -0.075 | 0.033  | 0.03   | -0.008 |
| CD150um lbp 2D firstorder Uniformity   | -0.742 | -0.101 | -0.107 | -0.032 | 0.233  | 0.016  | -0.005 | -0.071 | 0.023  | -0.015   | 0.017  | 0.017  | 0.046  | -0.006 | -0.069 | -0.049 | -0.134 | -0.043 | -0.02  | 0.019  | 0.087  | -0.003 | -0.035 | 0.06   | -0.011 | -0.072 | 0.029  |
| CD150um lbp 2D glcm Autocorrelation    | 0.656  | 0.339  | 0.107  | 0.133  | -0.177 | 0.071  | 0.086  | 0.035  | -0.044 | -0.047   | -0.006 | 0.018  | -0.062 | 0.078  | 0.063  | 0.024  | 0.071  | 0.14   | 0.032  | 0.064  | 0.007  | -0.058 | 0.1    | 0.021  | -0.008 | 0.018  | 0.024  |
| CD150um lbp 2D glcm ClusterProminence  | 0.645  | -0.033 | 0.022  | -0.025 | 0.021  | 0.119  | -0.015 | 0.005  | -0.036 | -0.072   | 0.086  | 0.031  | 0.048  | -0.081 | 0.065  | 0.069  | 0.232  | -0.008 | 0.006  | 0.183  | 0.227  | -0.037 | 0.242  | 0.013  | -0.042 | 0.005  | 0.063  |
| CD150um lbp 2D glcm ClusterShade       | -0.081 | -0.438 | -0.087 | -0.241 | 0.087  | 0.033  | -0.13  | 0.034  | 0.138  | -0.062   | 0.049  | -0.047 | 0.183  | -0.186 | -0.131 | -0.019 | 0.314  | -0.213 | -0.008 | 0.065  | 0.052  | -0.015 | 0.13   | -0.058 | -0.102 | -0.057 | -0.044 |
| CD150um lbp 2D glcm ClusterTendency    | 0.645  | 0.048  | 0.028  | 0.055  | -0.018 | 0.169  | -0.003 | 0.021  | -0.118 | -0.073   | 0.008  | 0.008  | -0.003 | -0.037 | 0.149  | 0.056  | 0.24   | 0.051  | 0.001  | 0.157  | 0.209  | -0.048 | 0.22   | 0.022  | -0.007 | 0.033  | 0.014  |
| CD150um lbp 2D glcm Contrast           | 0.116  | 0.395  | -0.186 | -0.056 | 0.014  | 0.118  | 0.112  | 0.1    | -0.117 | -0.135   | 0.294  | -0.08  | -0.074 | 0.037  | 0.368  | -0.028 | -0.391 | -0.009 | 0.035  | -0.05  | -0.028 | -0.024 | 0.056  | -0.07  | -0.009 | -0.006 | 0.012  |
| CD150um lbp 2D glcm Correlation        | 0.539  | -0.206 | 0.145  | 0.072  | 0.008  | 0.053  | -0.068 | -0.029 | -0.016 | 0.019    | -0.134 | 0.06   | 0.054  | -0.046 | -0.082 | 0.059  | -0.432 | 0.02   | -0.022 | 0.155  | 0.174  | -0.022 | 0.161  | 0.059  | -0.024 | 0.04   | 0.026  |

| Pathomic feature name                        | PF1    | PF2    | PF3    | PF4    | PF5    | PF6    | PF7    | PF8    | PF9    | PF10   | PF11   | PF12   | PF13   | PF14     | PF15   | PF16   | PF17   | PF18   | PF19   | PF20   | PF21   | PF22   | PF23   | PF24   | PF25   | PF26   | PF27   |
|----------------------------------------------|--------|--------|--------|--------|--------|--------|--------|--------|--------|--------|--------|--------|--------|----------|--------|--------|--------|--------|--------|--------|--------|--------|--------|--------|--------|--------|--------|
| CD150um lbp 2D glcm DifferenceEntropy        | 0.714  | 0.21   | -0.032 | 0.045  | 0.047  | 0.046  | 0.08   | 0.007  | -0.018 | -0.074 | 0.124  | -0.073 | -0.098 | 0.014    | 0.2    | -0.046 | -0.064 | 0.018  | -0.06  | 0.01   | -0.073 | -0.017 | 0.076  | -0.107 | -0.02  | 0.047  | -0.027 |
| CD150um lbp 2D glcm DifferenceVariance       | 0.058  | 0.375  | -0.198 | 0.073  | 0.138  | -0.024 | 0.101  | -0.023 | -0.049 | -0.071 | 0.084  | -0.109 | -0.122 | -0.11    | -0.069 | 0.003  | -0.588 | -0.068 | 0.014  | 0.057  | 0.054  | 0.08   | 0.023  | 0.006  | 0.005  | -0.059 | 0.012  |
| CD150um lbp 2D glcm JointEnergy              | -0.794 | -0.052 | -0.087 | 0.004  | -0.054 | 0.059  | -0.035 | 0.008  | 0.018  | 0.022  | 0.026  | 0.038  | 0.068  | -0.035   | -0.069 | -0.005 | -0.061 | 0.026  | 0.033  | -0.021 | 0.088  | 0.007  | -0.014 | 0.05   | 0.03   | -0.069 | 0.025  |
| CD150um lbp 2D glcm Idm                      | -0.023 | -0.079 | 0.033  | 0.185  | 0.131  | -0.168 | -0.065 | -0.137 | 0.177  | 0.056  | -0.276 | 0.043  | 0.045  | -0.152   | -0.627 | 0.042  | 0.002  | 0.009  | -0.027 | 0.136  | 0.041  | 0.044  | -0.026 | 0.058  | 0.038  | -0.077 | 0.02   |
| CD150um lbp 2D glcm InverseVariance          | -0.587 | -0.186 | 0.126  | -0.181 | -0.07  | -0.083 | -0.054 | -0.048 | 0.123  | 0.04   | -0.212 | 0.03   | 0.056  | 0.00E+00 | -0.199 | 0.125  | 0.021  | -0.045 | 0.001  | 0.061  | 0.139  | 0.025  | -0.108 | 0.184  | 0.017  | -0.077 | 0.114  |
| CD150um lbp 2D glcm MaximumProbability       | -0.606 | -0.017 | -0.162 | 0.22   | -0.12  | -0.011 | -0.056 | 0.071  | 0.099  | -0.035 | 0.055  | 0.125  | 0.147  | -0.062   | -0.192 | 0.006  | -0.186 | 0.074  | 0      | -0.022 | 0.032  | -0.052 | -0.03  | 0.117  | 0.104  | -0.079 | 0.065  |
| CD150um lbp 2D glcm SumEntropy               | 0.794  | 0.109  | 0.052  | 0.031  | 0.055  | -0.008 | 0.029  | -0.001 | -0.036 | -0.076 | -0.043 | -0.028 | -0.035 | 0.03     | 0.09   | 0.001  | 0.055  | -0.012 | -0.034 | 0.026  | 0.004  | -0.01  | 0.042  | -0.009 | -0.014 | 0.055  | -0.046 |
| CD150um lbp 2D glcm SumSquares               | 0.521  | 0.285  | -0.099 | 0.002  | -0.003 | 0.193  | 0.069  | 0.079  | -0.156 | -0.137 | 0.193  | -0.045 | -0.049 | -0.002   | 0.338  | 0.021  | -0.082 | 0.03   | 0.022  | 0.078  | 0.127  | -0.049 | 0.189  | -0.029 | -0.01  | 0.02   | 0.017  |
| CD150um lbp 2D glrlm RunVariance             | 0.247  | 0.159  | -0.044 | 0.51   | -0.002 | -0.211 | -0.021 | -0.064 | 0.056  | 0.004  | -0.012 | 0.146  | -0.132 | -0.005   | -0.283 | -0.07  | 0.03   | 0.201  | -0.014 | 0.116  | 0.004  | 0.062  | 0.017  | 0.267  | 0.086  | -0.026 | -0.006 |
| CD150um lbp 2D glrlm ShortRunEmphasis        | -0.482 | -0.125 | 0.002  | -0.202 | 0.008  | 0.06   | 0.01   | 0.089  | -0.055 | -0.009 | 0.145  | 0.039  | -0.007 | 0.202    | 0.514  | 0.012  | 0.004  | 0.013  | 0.016  | -0.003 | 0.012  | 0.006  | -0.103 | 0.11   | 0.007  | -0.01  | 0      |
| CD150um lbp 2D glszm ZoneEntropy             | 0.747  | 0.199  | 0.12   | 0.101  | -0.158 | -0.036 | 0.015  | 0.03   | 0.01   | -0.02  | -0.035 | -0.011 | -0.039 | -0.039   | -0.1   | 0.027  | 0.091  | 0.021  | -0.012 | 0.014  | -0.053 | 0.009  | 0.035  | -0.062 | 0.012  | 0.022  | -0.039 |
| CD150um lbp 2D glgm GrayLevelVariance        | 0.621  | 0.343  | -0.038 | 0.044  | 0.008  | 0.101  | 0.087  | 0.039  | -0.127 | -0.099 | 0.112  | -0.018 | -0.056 | 0.042    | 0.253  | 0.047  | -0.07  | 0.069  | 0.005  | 0.08   | 0.063  | -0.038 | 0.15   | -0.03  | -0.031 | 0.029  | 0.031  |
| CD150um lbp 2D glgm LargeDependenceEmphasis  | 0.425  | 0.191  | -0.006 | 0.374  | 0.041  | -0.14  | -0.017 | -0.076 | 0.078  | 0.001  | -0.128 | 0.042  | -0.026 | -0.142   | -0.479 | -0.02  | -0.034 | 0.059  | 0.009  | 0.061  | -0.028 | 0.037  | 0.06   | -0.007 | 0.038  | -0.03  | -0.013 |
| CD150um lbp 2D glgm LDHGLE                   | 0.578  | 0.32   | 0.056  | 0.351  | -0.197 | 0.052  | 0.072  | 0.03   | -0.077 | -0.029 | 0.042  | 0.02   | -0.092 | 0.012    | -0.091 | -0.037 | -0.017 | 0.086  | 0.082  | 0.054  | 0.011  | -0.034 | 0.127  | 0.03   | -0.03  | 0.015  | 0.06   |
| CD150um lbp 2D glgm LDLGLE                   | -0.48  | -0.041 | -0.109 | -0.034 | 0.523  | -0.154 | -0.052 | -0.022 | -0.178 | 0      | -0.006 | 0.001  | -0.022 | -0.084   | -0.012 | -0.009 | -0.093 | -0.182 | -0.084 | 0.039  | 0.105  | 0.077  | -0.015 | -0.048 | 0.017  | 0.077  | -0.049 |
| CD150um lbp 2D glgm SDHGLE                   | 0.599  | 0.35   | 0.101  | -0.009 | -0.218 | 0.047  | 0.127  | 0.051  | -0.078 | -0.083 | 0.042  | -0.011 | -0.118 | 0.125    | 0.207  | 0.049  | -0.01  | 0.136  | 0.031  | 0.038  | -0.041 | -0.031 | 0.076  | 0.016  | -0.009 | 0.016  | -0.013 |
| CD150um lbp 2D glgm SDLGLE                   | -0.585 | -0.058 | -0.147 | -0.053 | 0.415  | -0.058 | -0.026 | 0.011  | -0.183 | -0.04  | 0.084  | 0.014  | 0.031  | -0.03    | 0.122  | -0.053 | -0.1   | -0.183 | -0.104 | 0.032  | 0.071  | 0.03   | -0.015 | -0.045 | -0.033 | 0.056  | -0.001 |
| CD150um lbp 2D ngtdm Complexity              | 0.479  | 0.16   | -0.198 | -0.068 | 0.103  | 0.079  | 0.081  | 0.087  | 0.046  | -0.113 | 0.412  | -0.048 | 0.076  | 0.044    | 0.263  | -0.009 | -0.254 | -0.032 | 0.005  | 0.043  | 0.022  | -0.038 | 0.087  | -0.063 | -0.057 | -0.066 | -0.031 |
| CD200um wav LH firstorder 90Percentile       | -0.026 | -0.677 | 0.28   | 0.081  | 0.085  | 0.027  | -0.133 | 0.04   | 0.001  | -0.048 | -0.041 | -0.051 | 0.009  | 0.005    | -0.038 | 0.095  | -0.012 | -0.084 | -0.059 | -0.101 | 0.126  | 0.08   | 0.009  | 0.128  | 0.03   | 0.11   | 0.083  |
| CD200um wav LH firstorder InterquartileRange | -0.172 | -0.682 | 0.156  | -0.003 | 0.108  | 0.021  | -0.083 | -0.015 | 0.055  | 0.027  | -0.039 | 0.012  | 0.076  | 0.052    | -0.083 | 0.017  | -0.058 | -0.042 | 0.002  | -0.083 | 0.081  | 0.134  | 0.01   | 0.148  | -0.047 | 0.006  | 0.238  |
| CD200um wav LH firstorder Kurtosis           | 0.34   | 0.44   | 0.289  | -0.04  | -0.127 | -0.051 | 0.272  | 0.125  | -0.158 | 0.027  | -0.027 | -0.131 | -0.134 | 0.054    | -0.009 | -0.115 | 0.021  | 0.066  | 0.001  | 0.067  | 0.026  | -0.091 | -0.033 | -0.05  | -0.004 | -0.027 | 0.049  |
| CD200um wav LH firstorder Maximum            | 0.385  | -0.068 | 0.58   | 0.004  | -0.134 | 0.031  | 0.106  | 0.048  | -0.112 | -0.046 | -0.014 | -0.104 | -0.074 | -0.09    | -0.048 | -0.049 | 0.022  | 0.058  | 0.018  | -0.053 | 0.071  | 0.065  | -0.091 | -0.011 | 0.012  | -0.014 | 0.104  |
| CD200um wav LH firstorder Mean               | -0.052 | 0.264  | -0.044 | 0.07   | 0.094  | -0.15  | 0.084  | 0.136  | -0.622 | 0.063  | 0.075  | 0.257  | -0.047 | 0.075    | -0.036 | 0.026  | -0.033 | 0.026  | 0.063  | -0.018 | 0      | 0.023  | -0.143 | -0.047 | 0.019  | 0.003  | -0.016 |
| CD200um wav LH firstorder Median             | -0.133 | 0.276  | -0.029 | 0.103  | 0.033  | -0.261 | 0.062  | -0.025 | -0.623 | 0.119  | -0.051 | 0.073  | -0.079 | 0.107    | 0.031  | 0.019  | -0.143 | 0.042  | 0.091  | 0.021  | 0.018  | 0.016  | -0.146 | -0.036 | 0.08   | 0.027  | -0.069 |
| CD200um wav LH firstorder Range              | 0.355  | -0.165 | 0.605  | 0.034  | -0.144 | -0.001 | 0.089  | 0.042  | -0.123 | 0.034  | -0.054 | -0.162 | -0.092 | -0.003   | -0.06  | -0.073 | -0.02  | 0.044  | 0.016  | -0.03  | 0.152  | 0.016  | -0.061 | 0.01   | 0.009  | 0.011  | 0.089  |
| CD200um wav LH firstorder Uniformity         | -0.666 | 0.326  | -0.179 | -0.007 | 0.174  | -0.064 | 0.036  | -0.092 | 0.006  | -0.004 | -0.02  | 0.04   | -0.04  | 0.008    | 0.115  | -0.028 | 0.06   | -0.034 | -0.059 | 0.055  | -0.051 | -0.106 | 0.043  | -0.103 | -0.044 | 0.037  | 0.003  |
| CD200um wav LH glcm InverseVariance          | 0.021  | 0.698  | -0.062 | 0.032  | 0.219  | -0.072 | 0.083  | -0.081 | -0.09  | -0.086 | 0.069  | -0.024 | -0.074 | 0.103    | 0.152  | -0.053 | -0.052 | -0.142 | -0.064 | 0.001  | 0.025  | -0.062 | 0.05   | -0.053 | -0.057 | -0.003 | -0.011 |
| CD200um wav LH glszm SZNUN                   | -0.242 | -0.666 | -0.053 | -0.008 | 0.08   | -0.093 | -0.126 | 0.079  | -0.033 | 0.019  | -0.078 | -0.029 | 0.102  | -0.013   | -0.051 | 0.012  | -0.201 | 0.028  | -0.022 | -0.054 | 0.008  | 0.075  | -0.15  | -0.013 | 0.197  | -0.046 | 0.05   |
| CD200um wav LH glgm DependenceVariance       | 0.254  | 0.661  | 0.013  | 0.028  | 0.098  | 0.029  | 0.12   | -0.088 | 0.018  | 0.036  | 0.11   | 0.094  | -0.188 | 0.079    | 0.077  | -0.033 | 0.128  | 0.015  | -0.021 | 0.027  | 0.045  | -0.125 | 0.039  | 0.115  | -0.089 | 0.061  | -0.027 |

| Pathomic feature name                        | PF1    | PF2    | PF3    | PF4    | PF5    | PF6    | PF7    | PF8    | PF9    | PF10   | PF11   | PF12   | PF13   | PF14   | PF15   | PF16   | PF17   | PF18   | PF19   | PF20   | PF21   | PF22   | PF23   | PF24   | PF25   | PF26   | PF27   |
|----------------------------------------------|--------|--------|--------|--------|--------|--------|--------|--------|--------|--------|--------|--------|--------|--------|--------|--------|--------|--------|--------|--------|--------|--------|--------|--------|--------|--------|--------|
| CD200um wav LH gldm LDLGLE                   | -0.729 | 0.072  | -0.175 | 0.013  | 0.185  | -0.039 | -0.059 | -0.081 | 0.051  | -0.036 | -0.033 | 0.013  | 0.02   | -0.046 | 0.088  | -0.021 | -0.002 | -0.027 | -0.058 | 0.053  | 0.02   | -0.03  | 0.065  | -0.065 | -0.056 | 0.058  | 0.047  |
| CD200um wav LH ngtdm Busyness                | -0.497 | 0.227  | -0.211 | -0.036 | 0.1    | 0.018  | 0.432  | -0.054 | -0.046 | -0.059 | 0.052  | 0.201  | -0.056 | -0.02  | 0.032  | 0      | 0.049  | -0.049 | -0.031 | 0.046  | -0.214 | 0.036  | -0.025 | -0.105 | -0.022 | 0.034  | 0.003  |
| CD200um wav LH ngtdm Complexity              | 0.287  | -0.155 | 0.654  | 0.174  | -0.069 | -0.032 | 0.059  | 0.015  | -0.041 | -0.101 | 0.022  | -0.107 | 0.006  | -0.055 | -0.018 | 0.044  | 0.007  | 0.012  | -0.012 | -0.076 | 0.099  | 0.043  | -0.093 | 0.055  | 0.023  | 0.031  | 0.102  |
| CD200um wav HL firstorder 10Percentile       | 0.094  | 0.624  | -0.342 | -0.054 | 0.035  | 0.004  | 0.079  | 0.045  | -0.093 | 0.081  | -0.025 | 0.116  | 0.081  | 0.014  | -0.062 | 0.117  | -0.181 | 0.126  | 0.073  | -0.099 | 0.049  | 0.068  | -0.004 | 0.099  | 0.025  | 0.048  | 0.125  |
| CD200um wav HL firstorder 90Percentile       | -0.127 | -0.62  | 0.309  | 0.105  | 0.03   | 0.068  | -0.1   | 0.036  | 0.204  | -0.159 | 0.019  | -0.001 | -0.019 | 0.109  | -0.002 | -0.045 | 0.137  | -0.12  | -0.055 | -0.001 | -0.024 | -0.064 | -0.037 | 0.028  | -0.049 | -0.075 | -0.113 |
| CD200um wav HL firstorder Mean               | -0.143 | 0.488  | -0.153 | 0.06   | -0.096 | -0.064 | 0.056  | 0.159  | 0.112  | 0.032  | 0.144  | 0.349  | 0.172  | 0.046  | -0.009 | 0.11   | -0.082 | 0.054  | 0.122  | -0.13  | 0.03   | 0.092  | -0.05  | 0.144  | 0.024  | -0.081 | 0.182  |
| CD200um wav HL firstorder Median             | -0.292 | 0.523  | -0.164 | 0.096  | -0.289 | -0.097 | 0.015  | 0.009  | -0.002 | 0.157  | 0.086  | 0.149  | 0.066  | -0.069 | 0.104  | 0.062  | -0.119 | 0.106  | 0.127  | -0.108 | 0.152  | 0.035  | -0.076 | -0.054 | 0.092  | -0.098 | 0.103  |
| CD200um wav HL firstorder Minimum            | -0.257 | 0.306  | -0.563 | -0.049 | 0.056  | 0.032  | -0.016 | -0.134 | 0.095  | -0.073 | -0.067 | 0.012  | -0.003 | -0.002 | 0.021  | 0.002  | -0.109 | -0.066 | -0.023 | -0.153 | 0.145  | 0.158  | 0.073  | 0.007  | 0.046  | 0.229  | 0.093  |
| CD200um wav HL firstorder Range              | 0.313  | -0.239 | 0.629  | 0.003  | -0.089 | -0.044 | 0.049  | 0.109  | -0.026 | 0.037  | 0.064  | -0.058 | 0.025  | -0.004 | -0.031 | -0.047 | 0.094  | 0.041  | 0.028  | 0.041  | -0.141 | -0.005 | -0.087 | 0      | -0.01  | -0.188 | -0.059 |
| CD200um wav HL firstorder Skewness           | 0.258  | -0.081 | 0.171  | -0.115 | -0.17  | -0.005 | 0.046  | -0.005 | 0.117  | -0.226 | -0.135 | -0.188 | 0.093  | -0.039 | -0.12  | -0.067 | -0.123 | -0.065 | -0.041 | -0.082 | 0.007  | 0.522  | -0.026 | 0.026  | 0.007  | 0.066  | 0.015  |
| CD200um wav HL firstorder TotalEnergy        | 0.234  | 0.137  | 0.433  | 0.026  | -0.094 | 0.045  | 0.556  | 0.092  | -0.024 | -0.099 | -0.003 | 0.05   | -0.01  | -0.046 | 0.056  | -0.055 | 0.023  | 0.041  | 0.033  | -0.01  | -0.062 | 0.095  | -0.121 | -0.04  | 0.043  | -0.083 | 0.01   |
| CD200um wav HL glcm ClusterProminence        | -0.039 | -0.399 | 0.491  | 0.057  | 0.151  | -0.021 | -0.067 | 0.033  | 0.101  | -0.109 | 0.076  | -0.022 | 0.074  | 0.126  | -0.096 | 0.014  | 0.259  | -0.174 | -0.017 | 0.044  | -0.116 | -0.08  | 0.04   | 0.136  | -0.098 | -0.123 | 0.041  |
| CD200um wav HL glcm Correlation              | 0.527  | 0.061  | 0.097  | 0.148  | -0.012 | 0.12   | 0.014  | 0.034  | 0.36   | 0.1    | 0.089  | -0.003 | 0.101  | -0.057 | -0.125 | -0.132 | -0.065 | -0.104 | 0.008  | 0.068  | 0.286  | 0.067  | 0.073  | -0.043 | 0.066  | 0.004  | -0.007 |
| CD200um wav HL glcm MaximumProbability       | -0.776 | -0.031 | -0.126 | -0.013 | 0.071  | -0.068 | -0.042 | -0.048 | -0.117 | 0.035  | -0.142 | 0.007  | -0.057 | -0.047 | -0.002 | 0.001  | 0.041  | 0.009  | -0.02  | 0.002  | -0.01  | -0.028 | 0.053  | -0.047 | -0.006 | 0.051  | -0.029 |
| CD200um wav HL glcm SumEntropy               | 0.726  | 0.064  | 0.286  | 0.087  | -0.16  | 0.041  | -0.006 | 0.086  | 0.043  | -0.064 | 0.048  | 0.005  | -0.011 | 0.002  | 0.01   | 0.012  | 0.004  | -0.013 | 0.011  | -0.027 | 0.039  | 0.062  | -0.077 | 0.015  | 0.054  | -0.046 | -0.047 |
| CD200um wav HL ngtdm Busyness                | -0.4   | 0.372  | -0.127 | 0.05   | 0.42   | -0.068 | 0.251  | -0.097 | 0.06   | -0.078 | -0.061 | 0.097  | 0.017  | -0.008 | 0.059  | -0.062 | 0.043  | -0.065 | -0.183 | -0.011 | 0.07   | 0.011  | 0.038  | -0.07  | -0.044 | 0.161  | 0.063  |
| CD200um wav HL ngtdm Complexity              | 0.179  | -0.239 | 0.652  | 0.12   | 0.017  | 0.014  | 0.052  | 0.078  | 0.052  | -0.175 | 0.046  | -0.003 | 0.043  | 0.024  | -0.014 | -0.018 | 0.164  | -0.125 | -0.028 | -0.023 | -0.098 | -0.013 | -0.095 | 0.095  | -0.026 | -0.115 | 0.024  |
| CD200um wav HL ngtdm Strength                | -0.225 | -0.624 | 0.249  | 0.013  | 0.117  | -0.003 | -0.172 | 0.025  | 0.152  | 0.014  | 0.047  | -0.136 | 0.064  | 0.066  | -0.052 | -0.03  | 0.154  | -0.056 | 0.024  | 0.094  | -0.058 | -0.07  | 0.092  | 0.01   | -0.049 | -0.104 | -0.084 |
| CD200um wav HH firstorder 10Percentile       | -0.104 | 0.645  | -0.327 | -0.15  | -0.038 | -0.055 | 0.078  | -0.083 | -0.216 | 0.067  | 0.029  | 0.015  | -0.047 | -0.127 | -0.013 | 0.025  | -0.016 | 0.07   | 0.01   | -0.017 | -0.047 | 0.038  | 0.018  | -0.073 | 0.046  | -0.075 | -0.063 |
| CD200um wav HH firstorder 90Percentile       | -0.103 | -0.704 | 0.301  | 0.113  | 0.064  | 0.006  | -0.067 | 0.049  | 0.148  | -0.09  | 0.02   | -0.062 | -0.062 | 0.04   | 0.034  | -0.012 | -0.058 | -0.067 | -0.014 | 0.014  | -0.041 | -0.014 | -0.004 | 0.089  | -0.027 | 0.031  | 0.007  |
| CD200um wav HH firstorder InterquartileRange | -0.087 | -0.628 | 0.3    | 0.04   | 0.002  | -0.083 | -0.066 | 0.092  | 0.203  | -0.135 | 0.008  | 0.081  | 0.005  | 0.062  | 0.068  | 0.003  | 0.099  | -0.137 | -0.037 | 0.05   | -0.063 | -0.132 | -0.053 | 0.091  | -0.073 | 0.124  | 0.01   |
| CD200um wav HH firstorder Kurtosis           | 0.481  | 0.346  | 0.242  | -0.106 | -0.052 | 0.053  | 0.119  | 0.12   | -0.09  | 0.166  | 0.036  | -0.146 | -0.014 | 0.071  | -0.079 | -0.034 | -0.006 | 0.038  | 0.256  | -0.005 | -0.052 | -0.144 | 0.089  | 0.03   | 0.036  | -0.001 | 0.02   |
| CD200um wav HH firstorder Maximum            | 0.315  | -0.37  | 0.538  | 0.073  | -0.012 | 0.056  | 0.054  | 0.186  | 0.103  | -0.068 | 0.024  | -0.02  | -0.006 | 0.109  | -0.034 | -0.025 | 0.038  | -0.029 | 0.094  | 0.119  | -0.026 | -0.096 | 0.009  | 0.111  | -0.027 | 0.037  | -0.011 |
| CD200um wav HH firstorder Skewness           | 0.16   | 0.074  | -0.075 | 0.074  | -0.059 | 0.044  | -0.017 | 0.047  | 0.043  | -0.045 | -0.127 | -0.155 | -0.069 | -0.072 | -0.089 | -0.034 | 0.024  | 0.025  | -0.079 | 0.648  | 0.008  | -0.023 | 0.022  | 0.013  | 0.02   | 0.015  | -0.009 |
| CD200um wav HH firstorder Uniformity         | -0.639 | 0.435  | -0.14  | 0.002  | 0.099  | -0.009 | -0.026 | -0.037 | 0.133  | 0.013  | 0.024  | 0.062  | 0.082  | -0.042 | 0.018  | 0.026  | 0.085  | -0.019 | -0.054 | -0.026 | 0.092  | -0.009 | 0.027  | -0.043 | -0.017 | -0.024 | 0.02   |
| CD200um wav HH glcm JointAverage             | 0.295  | -0.304 | 0.61   | -0.013 | -0.014 | 0.04   | 0.091  | 0.189  | 0.086  | -0.034 | 0.025  | -0.025 | 0.039  | 0.107  | 0.001  | -0.024 | -0.009 | -0.051 | 0.094  | -0.143 | -0.015 | -0.011 | -0.017 | 0.098  | 0.031  | 0.072  | -0.019 |
| CD200um wav HH gldm DependenceVariance       | 0.115  | 0.703  | -0.051 | 0.016  | -0.151 | 0.045  | 0.089  | -0.02  | 0.124  | -0.028 | -0.046 | 0.04   | 0.012  | 0.117  | -0.188 | 0.026  | -0.011 | 0.024  | -0.035 | 0.086  | -0.101 | 0.004  | -0.088 | 0.009  | 0.082  | 0.017  | -0.012 |
| CD200um wav HH ngtdm Busyness                | -0.399 | 0.55   | -0.054 | 0.05   | 0.243  | -0.034 | 0.208  | -0.016 | 0.117  | -0.031 | 0.041  | 0.139  | 0.031  | -0.051 | 0.066  | -0.01  | 0.107  | -0.032 | -0.158 | 0.061  | 0.123  | 0.039  | -0.009 | -0.021 | -0.033 | 0.026  | 0.056  |
| CD200um wav HH ngtdm Complexity              | 0.169  | -0.333 | 0.603  | 0.184  | 0.04   | 0.023  | 0.036  | 0.159  | 0.094  | -0.197 | 0.039  | 0.082  | 0.057  | 0.093  | -0.027 | 0.026  | 0.04   | -0.103 | -0.013 | -0.015 | 0.011  | -0.086 | -0.058 | 0.125  | -0.033 | 0.058  | 0.034  |
| CD200um wav LL firstorder InterquartileRange | 0.266  | -0.279 | 0.491  | 0.073  | -0.13  | 0.05   | -0.09  | 0.043  | 0.174  | 0.203  | -0.171 | -0.09  | 0.028  | -0.01  | 0.045  | -0.226 | 0.007  | -0.001 | -0.215 | 0.011  | -0.067 | 0.026  | 0.051  | -0.038 | 0.084  | 0.012  | 0.027  |
| CD200um wav LL firstorder Kurtosis           | 0.168  | 0.045  | -0.049 | 0.081  | 0.16   | -0.119 | 0.108  | 0      | -0.115 | 0.128  | 0.195  | 0.064  | -0.028 | 0.045  | 0.045  | 0.272  | -0.016 | 0.04   | 0.626  | -0.091 | 0.007  | -0.008 | -0.033 | -0.015 | -0.002 | -0.06  | -0.015 |

| Pathomic feature name                  | PF1    | PF2    | PF3    | PF4    | PF5    | PF6    | PF7    | PF8    | PF9    | PF10   | PF11   | PF12   | PF13   | PF14   | PF15     | PF16   | PF17   | PF18   | PF19   | PF20   | PF21   | PF22   | PF23   | PF24   | PF25   | PF26   | PF27   |
|----------------------------------------|--------|--------|--------|--------|--------|--------|--------|--------|--------|--------|--------|--------|--------|--------|----------|--------|--------|--------|--------|--------|--------|--------|--------|--------|--------|--------|--------|
| CD200um wav LL firstorder Minimum      | 0.174  | -0.013 | 0.359  | -0.422 | -0.131 | 0.021  | -0.117 | -0.02  | -0.007 | -0.06  | -0.046 | -0.447 | -0.033 | -0.014 | -0.018   | -0.021 | -0.081 | 0.152  | -0.086 | -0.042 | 0.017  | -0.059 | 0.051  | -0.031 | -0.158 | 0.066  | -0.137 |
| CD200um wav LL firstorder Range        | 0.435  | -0.098 | 0.57   | 0.191  | -0.163 | -0.05  | 0.169  | 0.067  | 0.047  | 0.141  | -0.035 | -0.045 | 0.008  | 0.064  | 0.023    | -0.074 | -0.031 | -0.023 | 0.1    | -0.011 | 0.006  | 0.078  | 0.003  | -0.037 | 0.067  | -0.004 | 0.021  |
| CD200um wav LL firstorder Skewness     | -0.142 | -0.075 | -0.217 | -0.175 | 0.289  | -0.126 | -0.051 | 0.001  | 0.009  | 0.587  | 0.015  | -0.181 | 0.071  | -0.013 | -0.085   | -0.047 | 0.037  | -0.073 | 0.113  | -0.138 | 0.039  | -0.06  | -0.016 | 0.054  | -0.046 | -0.03  | -0.076 |
| CD200um wav LL glcm JointAverage       | 0.364  | -0.102 | 0.592  | 0.207  | -0.208 | 0.012  | 0.141  | 0.045  | 0.047  | -0.172 | -0.036 | -0.112 | 0.006  | 0.031  | 0.087    | -0.055 | -0.032 | -0.006 | 0.003  | 0.011  | -0.066 | 0.044  | 0.026  | -0.04  | 0.043  | 0.016  | 0.074  |
| CD200um wav LL glcm ClusterShade       | -0.036 | 0.026  | -0.135 | -0.655 | 0.133  | -0.154 | -0.006 | 0.039  | 0.048  | 0.304  | -0.029 | 0.03   | 0.03   | 0.013  | -0.057   | -0.037 | 0.025  | 0.049  | 0.051  | -0.015 | 0.019  | 0.154  | 0.007  | 0.089  | -0.154 | 0.005  | -0.089 |
| CD200um wav LL glcm ClusterTendency    | 0.251  | -0.148 | 0.473  | 0.439  | -0.09  | -0.094 | -0.045 | 0.058  | 0.044  | 0.257  | -0.061 | -0.009 | 0.087  | 0.062  | 0.022    | -0.091 | 0.007  | -0.003 | 0.028  | -0.01  | 0.015  | 0.151  | 0.026  | -0.102 | 0.16   | -0.004 | -0.004 |
| CD200um wav LL glcm Contrast           | 0.042  | -0.541 | 0.428  | 0.178  | 0.062  | 0.048  | -0.094 | -0.057 | 0.259  | 0.027  | -0.055 | -0.231 | -0.002 | 0.035  | -0.006   | -0.036 | 0.01   | -0.096 | 0.003  | 0.024  | 0.09   | 0.073  | 0.035  | 0.023  | 0.025  | -0.004 | 0.005  |
| CD200um wav LL glcm Correlation        | 0.591  | 0.327  | 0.172  | 0.135  | 0.038  | -0.122 | 0.092  | 0.008  | -0.13  | 0.269  | -0.016 | 0.159  | -0.012 | 0.048  | 0.00E+00 | -0.082 | 0.003  | 0.057  | -0.022 | 0.035  | -0.09  | 0.035  | 0.025  | -0.022 | 0.033  | 0.034  | 0.047  |
| CD200um wav LL glcm DifferenceVariance | 0.176  | -0.372 | 0.544  | 0.209  | 0.007  | -0.001 | -0.113 | -0.019 | 0.183  | 0.012  | -0.026 | -0.292 | 0.02   | 0.009  | 0.008    | -0.003 | 0.031  | -0.056 | 0.039  | 0.013  | 0.091  | 0.097  | 0.038  | 0      | 0.081  | -0.019 | -0.048 |
| CD200um wav LL glcm lmc2               | 0.044  | -0.241 | -0.048 | 0.049  | 0.034  | -0.061 | -0.701 | -0.078 | 0.11   | 0.086  | -0.018 | -0.104 | 0.09   | -0.038 | -0.038   | -0.077 | 0.005  | 0.017  | -0.143 | -0.061 | 0.061  | -0.05  | 0.072  | 0.064  | 0.022  | -0.048 | 0.008  |
| CD200um wav LL glrlm ShortRunEmphasis  | -0.372 | -0.604 | 0.019  | 0.024  | -0.009 | 0.031  | -0.146 | 0.018  | 0.068  | 0.029  | -0.168 | 0.026  | 0.121  | -0.025 | -0.022   | -0.063 | 0.051  | 0.103  | -0.132 | -0.189 | 0.061  | 0.122  | -0.074 | -0.018 | 0.012  | -0.001 | -0.048 |
| CD200um wav LL glgm LDLGLE             | -0.607 | 0.199  | -0.125 | 0.068  | 0.418  | -0.043 | -0.049 | -0.057 | 0.108  | -0.023 | -0.037 | 0.036  | 0.046  | -0.041 | 0.07     | -0.025 | 0.045  | -0.002 | -0.16  | 0.015  | 0.065  | -0.019 | 0.008  | -0.055 | -0.003 | 0.119  | 0.019  |
| CD200um wav LL ngtdm Busyness          | -0.781 | 0.066  | -0.149 | -0.018 | 0.134  | -0.015 | 0.034  | -0.027 | -0.058 | 0.047  | -0.027 | 0.055  | -0.059 | -0.053 | 0.023    | 0.004  | 0.035  | -0.045 | 0.002  | -0.024 | 0.026  | -0.014 | -0.046 | 0.002  | -0.011 | 0.02   | -0.038 |
| CD200um wav LL ngtdm Complexity        | 0.321  | -0.03  | 0.614  | 0.272  | -0.13  | -0.001 | 0.07   | -0.015 | 0.03   | 0.017  | -0.032 | -0.106 | -0.009 | -0.097 | 0.046    | -0.032 | -0.004 | -0.007 | -0.048 | -0.099 | 0.028  | 0.097  | -0.075 | -0.045 | 0.165  | -0.029 | -0.061 |
| CD200um lbp 2D firstorder Kurtosis     | -0.489 | -0.131 | -0.08  | -0.039 | 0.146  | 0.033  | -0.048 | -0.117 | 0.448  | 0.068  | -0.173 | -0.038 | 0.174  | 0.044  | -0.244   | -0.035 | -0.113 | 0.049  | -0.001 | 0.045  | 0.058  | 0.055  | -0.074 | 0.048  | 0.014  | -0.13  | -0.013 |
| CD200um lbp 2D firstorder Skewness     | -0.464 | -0.284 | -0.097 | -0.096 | 0.205  | 0.053  | -0.134 | -0.054 | 0.405  | 0.064  | -0.1   | -0.03  | 0.239  | -0.035 | -0.105   | -0.013 | -0.008 | -0.078 | -0.04  | -0.015 | 0.152  | 0.072  | -0.028 | 0.048  | -0.021 | -0.107 | -0.03  |
| CD200um lbp 2D firstorder Uniformity   | -0.68  | -0.307 | -0.131 | -0.054 | 0.174  | -0.056 | -0.007 | -0.07  | -0.057 | 0.043  | -0.023 | -0.047 | -0.033 | -0.059 | -0.157   | -0.071 | -0.062 | -0.007 | -0.006 | 0.062  | -0.093 | -0.02  | -0.016 | -0.047 | 0.018  | -0.015 | -0.072 |
| CD200um lbp 2D glcm ClusterProminence  | 0.488  | 0      | -0.005 | 0.02   | -0.001 | 0.174  | 0.006  | 0.131  | -0.262 | -0.078 | 0.433  | 0.026  | 0.172  | 0.06   | 0.086    | -0.021 | 0.138  | 0.029  | -0.058 | -0.01  | 0.161  | -0.096 | -0.036 | -0.064 | 0.011  | -0.018 | -0.027 |
| CD200um lbp 2D glcm ClusterTendency    | 0.553  | 0.037  | 0.024  | 0.049  | -0.07  | 0.198  | 0.011  | 0.178  | -0.218 | -0.031 | 0.378  | 0.043  | 0.153  | 0.076  | 0.079    | 0.039  | 0.152  | 0.062  | -0.032 | 0.013  | 0.159  | -0.028 | 0.017  | -0.038 | 0.005  | 0.012  | 0.033  |
| CD200um lbp 2D glcm Contrast           | 0.479  | 0.151  | -0.001 | -0.038 | -0.058 | 0.142  | 0.006  | 0.271  | 0.024  | -0.1   | 0.493  | 0.066  | -0.025 | -0.111 | 0.113    | 0.121  | -0.022 | -0.031 | 0.098  | -0.045 | -0.057 | -0.034 | -0.007 | 0.101  | 0.014  | 0.027  | 0.035  |
| CD200um lbp 2D glcm Correlation        | 0.112  | -0.154 | 0.054  | 0.089  | 0.047  | 0.099  | 0.017  | -0.074 | -0.575 | 0.088  | -0.126 | -0.062 | 0.136  | 0.228  | 0.021    | -0.111 | 0.171  | 0.03   | -0.114 | 0.01   | 0.271  | 0.03   | 0.03   | -0.086 | -0.02  | 0.041  | -0.032 |
| CD200um lbp 2D glcm DifferenceEntropy  | 0.71   | 0.214  | 0.095  | 0.017  | -0.082 | 0.039  | -0.008 | 0.152  | 0.096  | -0.059 | 0.212  | 0.044  | 0.023  | -0.027 | 0.084    | 0.087  | 0.09   | -0.031 | 0.048  | -0.017 | 0.046  | 0.005  | 0.026  | 0.039  | -0.01  | 0.007  | -0.038 |
| CD200um lbp 2D glcm DifferenceVariance | 0.344  | 0.183  | -0.001 | -0.038 | -0.045 | 0.045  | -0.038 | 0.225  | 0.139  | -0.122 | 0.52   | 0.072  | 0.109  | -0.172 | -0.012   | 0.083  | -0.189 | -0.053 | 0.037  | -0.144 | 0.025  | -0.004 | -0.1   | 0.138  | 0.089  | -0.014 | 0.088  |
| CD200um lbp 2D glcm JointEnergy        | -0.724 | -0.228 | -0.079 | -0.023 | 0.074  | -0.032 | 0.004  | -0.036 | -0.207 | 0.02   | -0.059 | -0.031 | -0.094 | -0.022 | -0.112   | -0.043 | -0.05  | 0.012  | 0.004  | 0.02   | -0.099 | -0.025 | -0.039 | -0.01  | 0.036  | 0.014  | -0.074 |
| CD200um lbp 2D glcm ldm                | -0.567 | -0.04  | -0.033 | 0.037  | 0.085  | -0.23  | -0.016 | -0.169 | -0.159 | -0.001 | -0.249 | -0.023 | 0.007  | -0.042 | -0.235   | -0.079 | -0.238 | 0.011  | -0.041 | -0.066 | -0.03  | 0.005  | -0.16  | 0.012  | 0.124  | -0.032 | -0.029 |
| CD200um lbp 2D glcm ldn                | -0.488 | -0.051 | -0.028 | 0.034  | 0.096  | -0.101 | -0.05  | -0.225 | 0.107  | 0.065  | -0.364 | -0.042 | 0.195  | 0.063  | -0.258   | -0.104 | -0.162 | 0.063  | -0.099 | -0.045 | 0.124  | 0.05   | -0.103 | -0.003 | 0.082  | -0.085 | 0.033  |
| CD200um lbp 2D glcm InverseVariance    | -0.526 | -0.138 | -0.038 | -0.071 | 0.12   | -0.178 | 0.011  | -0.198 | -0.095 | 0.074  | -0.406 | -0.072 | -0.003 | 0.072  | -0.064   | -0.074 | -0.228 | -0.033 | -0.007 | -0.062 | 0.021  | 0.061  | -0.096 | 0.032  | -0.011 | 0.041  | 0.083  |
| CD200um lbp 2D glcm MaximumProbability | -0.686 | -0.203 | -0.101 | 0.028  | 0.065  | 0.003  | -0.031 | 0.011  | -0.206 | -0.011 | -0.013 | 0.018  | -0.028 | -0.019 | -0.188   | -0.036 | -0.035 | 0.112  | 0.02   | 0.046  | -0.124 | -0.043 | -0.039 | 0.027  | 0.145  | 0.011  | -0.069 |
| CD200um lbp 2D glcm SumEntropy         | 0.747  | 0.221  | 0.076  | 0.045  | -0.103 | 0.032  | 0.007  | 0.096  | 0.023  | -0.038 | 0.119  | 0.026  | 0.054  | 0.016  | 0.089    | 0.056  | 0.04   | -0.012 | 0.009  | -0.046 | 0.104  | 0.038  | -0.01  | 0.029  | -0.015 | 0.031  | 0.03   |

| Pathomic feature name                 | PF1   | PF2    | PF3    | PF4    | PF5    | PF6    | PF7    | PF8    | PF9    | PF10   | PF11  | PF12  | PF13   | PF14   | PF15   | PF16   | PF17   | PF18   | PF19   | PF20   | PF21   | PF22   | PF23   | PF24   | PF25   | PF26   | PF27   |
|---------------------------------------|-------|--------|--------|--------|--------|--------|--------|--------|--------|--------|-------|-------|--------|--------|--------|--------|--------|--------|--------|--------|--------|--------|--------|--------|--------|--------|--------|
| CD200um lbp 2D glcm SumSquares        | 0.549 | 0.104  | 0.011  | 0.002  | -0.068 | 0.18   | 0.009  | 0.243  | -0.095 | -0.072 | 0.47  | 0.059 | 0.063  | -0.025 | 0.104  | 0.088  | 0.064  | 0.014  | 0.04   | -0.019 | 0.047  | -0.034 | 0.004  | 0.038  | 0.011  | 0.021  | 0.037  |
| CD200um lbp 2D glrlm LongRunEmphasis  | 0.018 | 0.209  | 0.067  | 0.263  | -0.059 | -0.257 | -0.005 | -0.117 | -0.181 | -0.188 | 0.12  | 0.046 | -0.058 | -0.066 | -0.287 | -0.079 | -0.141 | 0.107  | -0.008 | 0.019  | -0.029 | -0.021 | -0.081 | 0.031  | 0.458  | -0.025 | -0.037 |
| CD200um lbp 2D glszm ZoneEntropy      | 0.635 | 0.381  | 0.174  | 0.085  | -0.232 | -0.007 | 0.02   | 0.035  | -0.045 | -0.087 | -0.02 | 0.065 | -0.012 | -0.021 | -0.008 | 0.035  | -0.006 | 0.029  | -0.008 | -0.077 | 0.043  | -0.024 | -0.037 | 0.043  | 0.044  | -0.023 | 0.038  |
| CD200um lbp 2D glgm GrayLevelVariance | 0.535 | 0.187  | 0.05   | 0.026  | -0.118 | 0.16   | 0.029  | 0.225  | -0.129 | -0.065 | 0.457 | 0.083 | 0.025  | -0.011 | 0.101  | 0.078  | 0.055  | 0.025  | 0.062  | -0.029 | 0.052  | -0.048 | 0.004  | 0.039  | 0.015  | 0.009  | 0.041  |
| CD200um lbp 2D glgm LDHGLE            | 0.448 | 0.33   | 0.092  | 0.251  | -0.174 | -0.007 | 0.077  | 0.094  | -0.168 | -0.07  | 0.4   | 0.024 | -0.089 | 0.021  | -0.006 | -0.01  | -0.021 | 0.108  | 0.075  | 0.012  | -0.016 | -0.045 | -0.011 | -0.002 | 0.159  | -0.024 | 0.055  |
| CD200um lbp 2D glgm SDHGLE            | 0.596 | 0.319  | 0.126  | -0.014 | -0.248 | 0.137  | 0.085  | 0.139  | -0.099 | -0.05  | 0.209 | 0.054 | -0.034 | 0.068  | 0.074  | 0.057  | 0.058  | 0.071  | 0.051  | -0.025 | 0.032  | -0.025 | 0.06   | 0.034  | -0.019 | 0.059  | 0.048  |
| CD200um lbp 2D glgm SDLGLE            | -0.51 | -0.415 | -0.104 | -0.076 | 0.348  | 0.045  | -0.04  | 0.127  | -0.096 | 0.065  | 0.098 | 0.026 | -0.031 | -0.047 | 0.038  | 0.018  | -0.003 | -0.116 | 0.043  | 0.129  | -0.071 | -0.007 | -0.082 | 0.062  | -0.05  | 0.055  | 0.005  |
| CD200um lbp 2D ngtdm Busyness         | 0.189 | 0.231  | 0.202  | -0.057 | -0.096 | 0.02   | 0.708  | 0.115  | -0.036 | -0.018 | 0.013 | 0.071 | -0.038 | -0.008 | 0.029  | -0.046 | -0.033 | 0.039  | 0.04   | 0.015  | -0.019 | 0.063  | -0.045 | -0.014 | -0.002 | -0.041 | 0.009  |
| CD200um lbp 2D ngtdm Complexity       | 0.593 | 0.101  | 0.02   | -0.044 | -0.07  | 0.231  | -0.02  | 0.261  | -0.088 | -0.109 | 0.274 | 0.068 | -0.018 | -0.11  | 0.1    | 0.127  | 0.093  | -0.04  | 0.044  | 0.01   | -0.017 | -0.109 | 0.047  | 0.115  | 0.033  | 0.084  | 0.031  |
| CD200um lbp 2D ngtdm Contrast         | 0.14  | -0.026 | -0.113 | -0.014 | 0.015  | 0.029  | 0.057  | 0.172  | -0.087 | 0      | 0.746 | 0.019 | 0.049  | -0.043 | 0.09   | 0.006  | -0.102 | 0.012  | 0.069  | -0.062 | -0.043 | 0.023  | -0.034 | -0.037 | -0.003 | -0.078 | -0.042 |

**Table S14** Summary of the significantly correlated radiomic-pathomic factors, with radiomic factors extracted from ADC. Abbreviations: ADC = Apparent Diffusion Coefficient; FDR = False Discovery Rate; BF = Bayes Factor; F = Factor.

| Radiomic factor name | Pathomic factor name | $\rho$                | FDR q-value | BF                 |
|----------------------|----------------------|-----------------------|-------------|--------------------|
| ADC_F7               | P_F8                 | $3.81 \times 10^{-3}$ | 0.643       | $1.97 \times 10^4$ |
| ADC_F10              | P_F8                 | $3.81 \times 10^{-3}$ | 0.637       | $1.46 \times 10^4$ |
| ADC_F5               | P_F3                 | $4.46 \times 10^{-3}$ | 0.614       | $4.93 \times 10^3$ |
| ADC_F2               | P_F24                | $2.21 \times 10^{-3}$ | 0.613       | $4.65 \times 10^3$ |
| ADC_F1               | P_F22                | $1.37 \times 10^{-2}$ | 0.528       | $1.83 \times 10^2$ |

**Table S15** Summary of the significantly correlated radiomic-pathomic factors, with radiomic factors extracted from T1C. Abbreviations: T1C = post-contrast T1; FDR = False Discovery Rate; BF = Bayes Factor; F = Factor.

| Radiomic factor name | Pathomic factor name | $\rho$                | FDR q-value | BF                 |
|----------------------|----------------------|-----------------------|-------------|--------------------|
| T1C_F7               | P_F9                 | $2.47 \times 10^{-2}$ | 0.597       | $2.38 \times 10^3$ |
| T1C_F13              | P_F7                 | $2.47 \times 10^{-2}$ | 0.586       | $1.53 \times 10^3$ |
| T1C_F2               | P_F7                 | $4.10 \times 10^{-2}$ | -0.545      | $3.23 \times 10^2$ |
